# Supplementary material
Source: publisher figshare collection journal article supplement (https://acs.figshare.com/ndownloader/files/11378051)
Supplement: Supplementary file 1 [file 11378051]

## Sheet: Table S1
Table S1. NCI-60 cell line gene expression 5 Platform Gene Transcript data downloaded CellMiner resource website
Note: For selection of genes expressed in individual cell lines, threshold filter of expression values ≤4.42 were excluded
Probe ID	Gene name	Entrez Gene ID	Chromosome	Start	End	Cytoband	RefSeq (mRNA)	RefSeq (protein)	BR:MCF7	BR:MDA-MB-231	BR:HS 578T	BR:BT-549	BR:T-47D	CNS:SF-268	CNS:SF-295	CNS:SF-539	CNS:SNB-19	CNS:SNB-75	CNS:U251	CO:COLO 205	CO:HCC-2998	CO:HCT-116	CO:HCT-15	CO:HT29	CO:KM12	CO:SW-620	LE:CCRF-CEM	LE:HL-60(TB)	LE:K-562	LE:MOLT-4	LE:RPMI-8226	LE:SR	ME:LOX IMVI	ME:MALME-3M	ME:M14	ME:SK-MEL-2	ME:SK-MEL-28	ME:SK-MEL-5	ME:UACC-257	ME:UACC-62	ME:MDA-MB-435	ME:MDA-N	LC:A549/ATCC	LC:EKVX	LC:HOP-62	LC:HOP-92	LC:NCI-H226	LC:NCI-H23	LC:NCI-H322M
C1orf222	C1orf222	339457	1			1p36.33			6.692	6.788	6.794	6.655	6.567	6.196	6.67		6.847	6.524	6.848	6.931	6.508	6.399	6.495	6.523	6.844	6.747	6.853	6.949	6.973	6.828	6.707	6.377	6.306	6.114	6.344	6.382	6.616	6.647	6.427	6.617	6.508	6.708	6.983	6.754	6.78	7.045	6.601	6.508	6.654
HMGN2P18	HMGN2P18	648822	1			1q22			4.685			4.925		4.969			4.727			4.705	4.445		4.916	4.517	4.574		4.689	4.421	4.761			4.682	4.706									4.486			4.646				4.428
LOC100133616	LOC100133616	100133616	1						4.51				4.831	5.146	4.526		4.626		4.534		4.956	5.187	4.607	5.471	4.911		4.537	4.731		4.67	4.77		4.662		4.547	4.521	4.841	5.281	4.487				5.621	5.564	5.093	4.645	4.524	6.058	4.516
LOC100134237	LOC100134237	100134237	1						4.736			4.428			4.942				4.476					4.638	4.68	5.191	5.073		4.775							4.527	4.438		4.436	4.462			4.962	4.641					4.599
LOC100996724	LOC100996724	100996724	1						4.695	5.78	4.998		5.038	5.599	4.762		6.805	6.83	4.97	4.79	4.615		4.602	4.425	4.653	4.498	5.098	4.515	5.934	5.019	4.426	6.156	5.287	5.963	5.166	5.346	7.372	4.867	8.033	4.83	4.777	5.045	4.458	4.762	6.295	5.222	6.538	4.858	4.661
LOC100996732	LOC100996732	100996732	1						6.666	6.33	6.876	5.093	5.329	6.558	5.424		4.845	6.54	5.902	5.245	5.789	5.514	6.698	5.656	4.857	7.91	5.267	4.705	5.671	5.757	5.287	6.556	8.26	6.123	7.092	5.066	6.735	7.458	6.918	7.547	6.941	6.502	6.652	6.434	8.373	7.117	6.778	7.898	6.007
LOC100996740	LOC100996740	100996740	1						5.641	7.776	6.882	5.908	7.799	7.95	8.257	5.885	7.513	7.09	7.489	8.593	7.544	7.35	7.224	8.734	7.845	8.765	8.04	6.962	6.435	7.263	8.308	7.457	8.517	7.233	7.638	8.683	7.332	7.705	6.947	7.502	8.422	8.114	5.758	9.487	8.397	6.952	7.895	8.07	8.735
LOC100996741	LOC100996741	100996741	1						4.639	5.769	5.777	4.424	6.985	5.466	6.366		5.562	5.92	5.602	6.594	5.833	7.161	6.502	8.147	5.78	7.946	5.418	6.894	4.759	5.367	6.835	6.898	6.732	5.145	6.852	6.636	6.627	6.803	5.497	7.3	6.758	6.744		7.224	6.38	5.771	5.791	7.096	6.653
LOC100996756	LOC100996756	100996756	1																												4.444	6.894
LOC100996761	LOC100996761	100996761	1							4.999	5.006	5.587	6.229	8.251	5.588		8.087	8.007	5.981													11.002	5.954	7.495	5.065	6.475	5.675	5.59	5.88	5.248		4.698			5.741	4.95	5.016
RAB7B	RAB7B	338382	1			1q32																						4.962
RNA5SP18	RNA5SP18	100873273	1						5.079	5.239	5.631	4.881	5.214	4.565	4.839		5.84	4.884	5.501	5.237		5.401	5.172	5.575	5.184	4.749	5.087	5.326	4.914	5.142	5.424	5.058	4.928	4.69	4.923	4.889	4.623	5.178	5.063	5.024	4.718	4.855	5.218	4.904	5.055	4.882	4.839	4.797	4.601
RNA5SP19	RNA5SP19	100873274	1						7.499	6.578	6.688	6.521	7.225	6.973	7.53		6.928	7.182	6.782	7.228	7.36	7.362	7.485	7.405	7.529	7.16	6.137	7.98	7.445	6.592	7.585	7.965	8.624	7.592	7.363	7.534	6.998	7.394	7.207	7.328	7.524	7.564	6.829	7.169	7.195	6.383	6.649	6.689	6.619
RNA5SP42	RNA5SP42	100873281	1						7.065	7.722	7.879	6.986	7.119	7.934	7.176		7.661	7.256	7.129	7.15	6.751	7.029	7.375	7.26	7.463	7.425	7.646	7.25	7.331	6.79	8.207	7.231	7.87	8.452	7.713	7.765	8.264	8.591	9.425	7.93	7.996	8.054	7.58	7.416	7.253	6.915	6.876	7.497	6.979
RNA5SP43	RNA5SP43	100873282	1						4.795	4.93	4.588	4.705	5.011	4.499	4.886		5.226		4.847	5.257	5.492	4.521	4.783	5.367	4.752	4.63	4.788	4.973	4.688	4.87		4.529			4.459		5.023		4.995	4.828	5.072	4.916		4.464	4.846	5.009	4.827	4.583	4.932
RNA5SP45	RNA5SP45	100873284	1								4.688	5.057	4.453				4.918	4.716	5.147	4.94			5.297		4.73	5.133	5.259	4.536	5.118	5.305	4.966		6.02		4.421		4.532		4.866	4.951	4.745	5.188	4.695			5.427	4.832	5.635	5.142
RNA5SP46	RNA5SP46	100873285	1																								4.527							4.567
RNA5SP49	RNA5SP49	100873288	1						4.96	5.877	4.474	5.192			4.74		5.089		5.575		4.939	6.049	4.922	5.368	4.496		5.464	5.344	5.34	5.398	4.675	5.16	4.461	5.224		6.012	5.432	4.675	4.824	5.782	6.607	5.501	4.597	4.688	5.044	4.588	5.46	5.339	4.726
RNA5SP53	RNA5SP53	100873291	1						5.066	5.217	6.271	5.794	4.946	5.138	4.951		4.969	5.655	6.165	5.586	4.427		4.541	4.969	5.41	4.569	5.843	5.421	5.658	5.392	5.089		5.287	4.52	4.492	4.822	4.642	5.037	4.645	5.448	4.837	5.541	5.379		5.512	5.528	6.027	5.005	6.105
RNA5SP55	RNA5SP55	100873293	1						4.609	5.118	4.812	4.924	4.882	4.728	5.085		5.583	5.446	5.205	5.181	4.84	5.118	5.356	5.157	5.226	5.066	5.306	6.029	5.883	4.995	6.572	5.648	5.745	5.528	5.416	5.411	4.82	6.054	5.887	5.818	5.504	5.188	5.253	5.224	4.651	5.152	4.73	4.939	5.276
RNA5SP60	RNA5SP60	100873295	1						6.946	7.226	7.178	6.879	7.478	7.445	7.483		7.038	7.303	6.713	7.365	7.415	7.458	7.146	7.685	7.934	7.071	6.318	6.518	6.604	6.344	7.035	7.277	7.92	7.486	7.455	6.973	7.127	7.172	6.833	7.217	7.18	6.865	7.357	7.227	7.705	6.291	7.619	7.036	7.547
RNA5SP62	RNA5SP62	100873297	1						6.386	6.013	5.951	5.921	6.169	6.007	6.058		6.436	5.682	6.152	5.383	6.499	6.251	6.224	6.36	6.59	5.964	6.375	6.346	6.767	6.529	6.533	5.72	6.073	5.441	5.567	6.172	6.04	6.173	6.068	6.393	6.549	6.72	6.486	5.946	6.303	6.419	6.282	6.219	6.121
RNA5SP63	RNA5SP63	100873298	1							4.435				4.718	4.557		4.769	4.744							4.567			5.213	5.098	4.869		4.799					4.558	4.79		4.735			4.497	4.544		4.766			5.009
RNA5SP64	RNA5SP64	100873299	1						4.948	5.137	5.102	4.745	5.076		4.437		4.947		4.979	4.955	4.822		5.075	5.017	5.145	5.076	5.155	4.749	4.768	5.585	4.653		4.59		5.351	4.925		5.136		4.945		4.596	5.282	4.829	4.56	5.285	4.773		4.7
RNA5SP65	RNA5SP65	100873300	1										4.713												4.642																4.773
RNA5SP68	RNA5SP68	100873303	1						5.087	4.516	4.497	4.503	5.875	5.267	5.576		5.214	4.575	5.863	5.186	5.378	5.25	5.508	5.379	5.478	5.367	5.28	4.763	5.438	5.11	4.516	5.176	5.053	5.48	4.984	4.424	4.515	5.293	5.158	4.896	4.923	4.677	5.223	4.772	4.847	5.209	4.432		4.827
RNA5SP69	RNA5SP69	100873304	1						6.166	6.485	6.214	5.623	5.601	5.856	5.711		6.148	6.168	6.054	5.473	5.699	5.869	6.096	6.151	5.58	6.115	6.147	5.964	6.271	6.136	5.174	4.783	5.267	6.299	6.07	5.924	5.74	6.158	5.652	5.475	5.458	5.827	6.413	5.772	6.086	5.995	5.788	5.977	6.039
RNA5SP71	RNA5SP71	100873305	1						6.687	6.395	6.318	6.108	6.434	6.612	6.819		6.445	6.43	6.486	6.602	6.719	6.536	6.504	6.621	6.791	6.705	6.408	6.446	6.625	6.434	6.261	6.119	6.243	6.391	6.235	6.474	6.114	6.26	6.17	6.26	6.728	6.323	6.222	6.081	6.695	6.071	6.37	5.987	5.66
RNA5SP74	RNA5SP74	100873308	1						5.105	5.007	5.147	4.614	5.34	5.312	5.819		4.705	5.152	5.151	5.168	5.1	5.238	4.997	5.615	5.368	5.027	5.524	5.419	5.307	5.023	6.307	5.927	5.612	5.596	4.957	5.148	5.279	5.078	4.716	5.245	5.316	5.356	5.074	5.142	5.062	4.917	5.255	5.149	4.604
RNA5SP76	RNA5SP76	100873310	1						5.275	4.573	4.449	4.465	4.595	4.422	4.731		4.474	4.564	5.106			4.563	4.566	4.808	5.084	4.593	4.844	4.742	5.199	4.947	5.012		4.718							4.479	4.951	4.474	4.952		5.041	4.634	4.717	4.529
RNA5SP81	RNA5SP81	100873315	1																										4.817
RNA5SP82	RNA5SP82	100873316	1						5.473	6.058		5.373	5.597	6.165	4.57		5.966	5.143	5.322	4.717	5.959	5.256	6.111	5.886	4.683	6.063	5.915	6.08	5.023	6.367	5.246	6.702	4.845	5.804	5.958	5.224	4.73	5.269	6.285	5.234	5.841	5.06	4.709	5.514	5.517	6.097	5.577	4.499	5.685
C1orf143	C1orf143	440714	1			1q41																								4.869						4.531									4.429
C1orf148	C1orf148	574432	1			1q42.13			5.048	4.641	4.629	4.985	5.519	5.244			5.691	5.242	4.786	4.842	5.481	5.281	6.021	5.673	5.536	5.06	5.032		4.983	5.047	5.587	4.713		5.906	5.629	4.82	5.31	4.648	5.573	5.199	5.804	5.647	5.202	5.123	5.653	5.19	5.193	5.634	5.987
CAMTA1-IT1	CAMTA1-IT1	100874340	1								4.435	4.469									4.489	4.439		4.542	4.619		4.907										4.881
CDC42-IT1	CDC42-IT1	100874292	1															4.444						4.698								4.533
DPYD-IT1	DPYD-IT1	100874267	1							6.531	6.373	5.398		5.935	5.626		6.761	6.731					4.51				6.5			6.396	5.95	6.875	5.134		5.883	5.301		4.63	4.793	4.637	5.502	5.32		5.33	4.974	5.032	5.513		5.061
ERVK-7	ERVK-7	449619	1			1q22			6.856	6.998	7.025	7.612	7.481	6.997	7.082	4.701	6.959	7.588	7.444	6.678	7.848	7.118	7.019	7.283	6.882	6.808	7.265	6.334	6.582	7.526	7.13	7.413	7.412	7.301	8.121	7.714	8.412	7.303	10.94	7.418	7.686	7.608	7.202	7.872	6.796	7.472	7.513	7.498	7.74
ERVK11-1	ERVK11-1	100859922	1			1p13.3			5.074	5.604	5.726	5.672	5.245	5.952	5.448		5.958	5.265	6.329	4.978	5.146	5.495	5.692	5.387	5.558	5.516	5.921	5.522	5.813	6.527	5.909	5.488	5.758	5.309	5.621	5.38	5.861	5.749	5.124	5.701	5.133	5.448	5.788	5.714	5.519	6.443	5.757	6.555	5.678
FLJ43585	FLJ43585	400800	1			1q31.3-q32.1			5.341	5.876	5.596	6.287	5.209	5.607	5.67		5.955	5.59	5.704	5.065	5.515	5.272	5.238	5.513	5.303	5.581	5.49	5.143	5.677	5.561	5.689	4.946	4.668	5.421	5.197	5.622	5.274	5.215	5.555	5.792	5.268	5.335	5.793	5.145	5.699	5.921	5.873	5.441	5.442
IGKV1OR2-3	IGKV1OR2-3	28866	1						7.58	7.59	7.672	7.529	7.456	9.009	9.442		7.779	7.265	7.508	8.711	10.826	7.406	7.367	7.879	7.697	7.481	7.619	7.574	7.391	7.479	7.989	8.116	9.842	6.881	7.584	9.364	7.297	7.501	7.177	8.018	8.493	8.804	7.587	7.263	7.723	8.492	7.427	7.591	8.227
IGKV1OR2-6	IGKV1OR2-6	28865	1						6.425	6.094	6.084	5.88	6.098	7.291	7.499		6.536	6.51	6.246	6.997	8.74	7.034	6.658	7.15	6.135	7.037	6.745	6.375	5.822	6.33	6.66	6.74	8.07	5.872	6.015	7.339	6.076	6.367	6.26	6.575	6.85	7.075	7.184	6.004	6.652	6.699	5.769	6.251	6.634
ITPKB-AS1	ITPKB-AS1	100873994	1																												4.726								4.847
KCNH1-IT1	KCNH1-IT1	100874296	1						4.506	4.763	4.665	5.166	5.752	5.464	4.735		4.565	5.164	4.913	4.714	4.545		4.674		4.882	4.641	4.484	4.565	4.996	4.496	4.867		4.504	6.49	4.46	5.63	5.544	5.857	5.066	4.647	4.934	4.572	4.837	5.123	4.635	4.601	4.513		4.788
LOC148638	LOC148638	148638	1			1q42.3			4.601	4.792			4.52						4.604								4.556	4.696	4.938	4.538		4.577	4.509	4.57		4.628	4.469			4.54	4.423		4.508		5.199	5.739		4.537	4.474
LOC284513	LOC284513	284513	1			1p36.13								4.669					4.444				4.689	4.766		4.742	4.579	4.915	4.951	4.811	4.562	4.543			4.547	4.681	5.12				4.886	4.905
LOC284628	LOC284628	284628	1			1p36.32			5.919	6.403	6.368	6.241	6.07	5.87	5.765		6.296	5.875	6.244	5.703	5.932	6.102	6.007	5.907	5.933	5.88	6.104	6.346	6.267	6.246	6.576	5.441	5.945	5.623	6.196	6.182	6.288	6.023	6.08	6.375	5.481	5.796	6.107	6.224	6.09	6.209	6.236	6.243	6.215
LOC284669	LOC284669	284669	1			1q32.3																				5.017				4.447
LOC440716	LOC440716	440716	1			1q41			4.641	4.473	4.593	4.564			4.465			4.615	4.706		4.436			5.222	4.676		4.962		4.92	4.626				4.801		4.871	4.537		4.692				4.456	5.011		4.775		4.486	4.581
LOC91548	LOC91548	91548	1			1q32.3			5.141				5.126	4.47			4.48		4.474	4.502	4.47	4.439	4.463	4.422	4.637	4.743	4.766	4.606	5.56	5.633	4.667	4.461		4.46	4.428	4.601	4.469		4.505		4.499			4.435		4.463	4.482	6.004	4.458
LRRC53	LRRC53	100144878	1			1p31.3			4.472	4.867	4.982	4.637	4.881	4.869	5.047		4.547	4.526	5.094	4.929	4.941	4.856	4.758	4.902	4.839	4.696	5.143	4.674	4.869	4.527	5.233	4.614	4.52	4.483		4.897	4.95	4.586	4.492	5.053	5.407		5.368	4.679	4.631	4.613	4.908	4.735	4.804
MIG7	MIG7	723788	1			1p22.1																																											4.588
PRO2012	PRO2012	55478	1			1q42.13			5.321	7.025	6.322	6.686	7.277	6.715	5.836		6.581	6.954	5.411	6.413	6.435	7.348	7.278	7.736	5.544	6.714	5.066	4.463	6.466	5.165		6.555	5.548	7.289	6.636	6.514	6.205	6.818	7.033	5.298	6.041	5.337	6.022	6.638	6.138	7.175	5.922	6.193	7.588
ZBTB40-IT1	ZBTB40-IT1	100874345	1						5.964	5.305	5.331	5.469	6.714	5.128	4.968		5.564	5.902	5.228	4.98	6.083	5.948	5.982	5.76	4.983	5.573	6.364	5.901	5.616	6.491	5.74	6.386	4.866	5.644	6.005	5.214	6.186	5.643	6.523	5.451	5.771	5.253	5.758	5.372	5.797	5.597	5.275	5.477	5.485
LOC729737	LOC729737	729737	1	134772	140566	1p36.33			9.412	9.313	8.476	8.175	9.621	8.712	8.422		8.472	8.488	8.308	8.727	9.139	9.45	9.098	10.116	8.585	8.577	8.594	9.133	9.416	9.1	8.478	10.47	8.229	8.603	9.098	9.198	8.717	8.706	8.823	8.355	8.978	8.862	8.413	9.484	8.833	8.587	8.143	9.265	9.207
CICP3	CICP3	100132630	1	656152	659631	1p36.33			6.152	6.484	6.477	6.223	6.434	6.282	6.075		6.453	6.455	5.708	5.809	6.203	5.698	6.127	6.452	6.287	6.248	6.559	6.243	6.202	6.156	7.39	5.623	5.968	5.858	5.886	5.756	6.325	5.911	6.511	6.39	6.264	6.411	6.233	6.517	6.496	6.383	6.303	6.461	6.292
LOC101060494	LOC101060494	101060494	1	661696	663628				5.435	5.021		4.719	6.252	5.48			5	6.13			5.071	5.778	5.853	6.864		5.631	5.133	5.921	6.849	5.473	4.616	5.402	4.971		5.479	6.68	5.208	4.499	6.336	4.547	5.184	6.074		5.832	5.736	6.145		6.32	6.131
LINC00115	LINC00115	79854	1	761585	762902	1p36.33																							5.617
LINC01128	LINC01128	643837	1	762970	794826	1p36.33			6.737	6.892	7.388	7.342	6.88	7.014	7.503	5.664	6.946	8.169	7.064	6.883	6.823	7.371	6.49	6.541	7.044	6.995	7.455	6.421	7.764	7.209	6.966	6.853	6.937	6.891	7.731	7.097	6.839	6.971	7.227	6.92	7.521	7.487	6.554	6.448	7.024	7.023	6.474	7.004	6.723
LOC284600	LOC284600	284600	1	846814	850734	1p36.33			7.275	7.1	6.979	7.321	6.984	6.417	7.04		6.91	7.142	7.098	6.994	6.692	7.064	6.798	6.909	7.011	6.737	6.989	7.152	7.073	6.92	7.042	6.495	6.432	6.045	6.644	6.548	6.942	6.701	6.444	7.092	6.953	7.067	7.438	7.137	7.219	7.29	6.923	7.306	7.208
LOC100130417	LOC100130417	100130417	1	852197	855072	1p36.33			6.684	5.511	5.905	6.037	6.937	5.154	6.629		5.865	6.352	6.014	5.277	5.254	5.646	5.064	5.103	5.449	5.341	5.476	5.339	5.692	5.428	5.652	5.001	5.329	5.092	5.214	5.186	5.337	5.319	5.075	5.463	5.168	5.529	6.16	6.202	5.385	5.464	5.619	6.1	5.858
SAMD11	SAMD11	148398	1	861120	879961	1p36.33	NM_152486.2	NP_689699.2	6.9	6.175	6.575	7.329	6.777	6.135	7.937		6.557	7.624	6.992	6.257	6.082	6.362	6.091	6.099	6.187	6.119	6.158	6.315	6.482	6.14	6.475	6.592	6.58	5.89	6.005	6.05	6.205	6.095	6.08	6.228	6.208	6.156	7.233	7.077	6.399	6.299	6.379	7.144	6.312
NOC2L	NOC2L	26155	1	879582	894679	1p36.33	NM_015658.3	NP_056473.2	8.107	7.805	8.198	8.967	7.805	8.708	8.438	5.409	8.325	8.128	8.558	8.424	8.432	9.018	8.489	8.374	8.672	8.284	8.152	8.894	9.36	7.974	8.726	8.858	8.54	7.727	8.579	8.969	9.135	8.163	8.93	9.245	9.416	9.282	8.042	7.991	8.88	8.042	7.404	8.794	8.024
KLHL17	KLHL17	339451	1	895966	901099	1p36.33	NM_198317.2	NP_938073.1	6.744	6.561	6.843	7.2	6.457	7.303	6.852		6.517	6.723	6.687	6.264	7.309	7.534	7.402	6.711	6.556	6.61	6.647	7.164	7.258	6.552	6.485	7.141	6.769	6.11	7.173	6.402	6.93	6.635	7.28	6.804	6.986	7.016	6.694	6.775	6.918	6.691	6.377	7.402	6.669
PLEKHN1	PLEKHN1	84069	1	901876	910484	1p36.33	NM_032129.2	NP_001153656.1	7.587	7.427	7.356	7.124	7.282	6.882	7.298		7.221	7.122	7.524	6.991	7.46	7.433	7.49	7.446	7.347	6.975	6.914	6.936	7.277	6.97	7.676	8.504	7.476	6.77	7.172	6.7	7.089	7.036	6.958	7.379	7.597	7.55	7.532	7.34	7.46	7.656	7.39	7.286	7.813
PERM1	PERM1	84808	1	910578	917497	1p36.33			5.419	5.803	5.585	5.808	5.708	5.406	5.642		5.705	5.011	5.696	5.4	5.528	5.271	5.14	5.77	5.448	5.194	5.512	5.601	5.958	5.583	6.053	5.493	5.192	5.528	5.345	5.54	5.443	5.649	6.271	5.599	5.766	5.822	5.269	5.795	5.363	5.633	5.322	5.787	5.825
HES4	HES4	57801	1	934341	935552	1p36.33	NM_001142467.1	NP_066993.1	6.599	6.274	6.965	7.034	7.208	6.908	4.978	6.681	6.595	6.246	6.965	5.163	7.369	7.283	7.343	7.358	5.951	6.549	5.509	5.205	6.467	5.428	6.62	4.912	6.274	4.974	5.525	5.459	5.884	5.235	5.821	5.264	6.185	6.4	6.37	7.019	6.49	5.144	6.256	6.301	6.818
ISG15	ISG15	9636	1	948846	949919	1p36.33	NM_005101.3	NP_005092.1	5.235	7.482	6.042	8.929	5.09	6.93	7.157	10.022	5.914	6.829	7.374	6.148	7.923	7.853	7.498	10.851	6.095	6.822	7.789	6.045	6.328	6.249	9.452	8.22	8.429	5.806	5.915	5.993	6.22	5.115	5.728	5.911	6.747	6.723	5.011	6.044	6.917	8.365	8.525	6.117	8.098
AGRN	AGRN	375790	1	955502	991499	1p36.33	NM_198576.3	NP_940978.2	8.717	8.855	8.734	8.207	9.562	8.594	8.552	8.168	8.561	9.008	9.052	7.739	8.737	8.09	8.91	10.308	8.159	8.261	6.925	7.086	8.266	6.703	7.901	7.483	8.7	8.611	8.415	7.852	8.312	8.033	8.861	8.572	8.549	8.367	8.882	9.311	9.518	9.211	9.503	9.196	9.649
LOC100288175	LOC100288175	100288175	1	993747	1004718	1p36.33			7.003	6.884	7.243	6.988	6.957	6.501	7.068		6.706	6.939	7.205	6.73	7.437	7.109	6.779	6.958	6.787	7.012	6.633	7.028	7.13	6.745	6.773	7.062	7.061	6.353	6.669	6.75	6.898	7.043	6.638	6.814	6.681	6.683	6.764	6.634	6.959	6.845	6.997	6.559	6.791
RNF223	RNF223	401934	1	1007125	1009687	1p36.33	NM_001205252.1	NP_001192181.1	7.427	6.271	6.3	5.997	7.281	5.886	6.056		6.233	6.11	6.171	6.354	6.832	6.252	6.45	6.433	6.577	6.193	6.205	6.032	6.136	5.885	6.394	5.793	6.111	6.18	5.992	6.006	5.999	6.217	5.952	6.039	6.07	6.281	6.064	6.057	6.215	6.035	6.152	6.11	7.366
C1orf159	C1orf159	54991	1	1017197	1051736	1p36.33	NM_017891.4	NP_060361.4	8.512	7.983	7.888	8.721	8.319	8.163	7.767		7.792	8.433	8.166	7.307	7.969	7.978	8.564	8.503	7.467	8.114	8.385	8.402	8.339	8.259	7.99	7.932	7.21	7.262	8.114	8.111	7.769	7.618	8.099	7.967	7.698	7.909	7.729	7.746	8.406	8.168	7.477	8.284	8.09
MIR200A	MIR200A	406983	1	1103242	1103332	1p36.33														4.919	5.377		4.445	5.267																							4.559
MIR429	MIR429	554210	1	1104384	1104467	1p36.33			5.023	4.809	4.579	4.793	4.615				5.988			5.515	6.097	4.455	5.952	7.425	5.167	6.319		4.904	5.172				4.455												4.536	4.6		4.959	4.728
TTLL10-AS1	TTLL10-AS1	100506376	1	1108435	1114934	1p36.33									4.549								4.886						4.461	4.611															4.53		4.689		4.783
TTLL10	TTLL10	254173	1	1109285	1133313	1p36.33	NM_001130045.1	NP_694986.2	5.589	5.628	5.417	5.571	5.683	5.251	5.167		5.437	5.227	5.494	5.249	6.032	5.012	5.855	6.624	6.115	6.036	6.151	5.738	5.787	5.469	5.797	5.18	5.506	5.49	5.781	5.842	5.606	5.383	5.174	5.568	5.531	5.419	5.791	5.219	5.513	5.487	5.483	5.294	5.889
TNFRSF18	TNFRSF18	8784	1	1138887	1142089	1p36.3	NM_148901.1	NP_004186.1	4.634				4.488									6.586				6.565					8.65	5.464										4.911			4.742	4.777		4.901
SDF4	SDF4	51150	1	1152287	1167447	1p36.33	NM_016547.2	NP_057260.2	7.65	7.798	8.676	8.719	7.975	8.685	8.919	9.109	8.34	9.181	8.567	8.738	8.506	8.208	8.046	8.305	8.449	8.059	7.36	8.408	8.267	7.403	8.974	8.537	7.792	8.335	8.595	8.053	9.521	8.01	8.824	8.832	8.587	8.27	7.54	8.102	8.207	8.369	7.786	8.71	7.854
B3GALT6	B3GALT6	126792	1	1167628	1170420	1p36.33	NM_080605.3	NP_542172.2	6.732	6.262	6.527	7.332	6.553	7.778	7.071	6.582	6.899	7.228	7.159	6.887	7.049	6.401	6.622	7.517	6.656	7.1	6.879	7.169	6.662	6.972	6.371	7.004	6.534	6.741	7.125	6.52	7.181	6.444	6.81	6.833	6.982	6.828	6.418	6.809	7.309	6.639	6.09	7.674	6.769
FAM132A	FAM132A	388581	1	1177825	1182102	1p36.33	NM_001014980.2	NP_001014980.1	7.526	7.37	7.989	7.567	7.864	7.032	7.533		7.563	7.576	7.762	7.436	7.614	7.255	7.093	7.498	7.668	7.433	7.274	7.889	7.405	7.44	7.219	6.839	7.15	6.699	7.239	7.201	7.571	7.408	7.136	7.459	7.243	6.95	7.524	7.209	7.595	7.201	7.31	7.079	7.311
UBE2J2	UBE2J2	118424	1	1189291	1209234	1p36.33	NM_194458.1	NP_477515.2	6.913	7.208	7.243	7.619	7.145	8.317	7.784	6.898	7.681	7.303	7.773	7.632	7.389	7.458	7.722	7.372	7.329	7.289	7.443	7.349	7.812	7.412	7.506	7.911	7.705	6.943	7.245	7.665	7.495	7.033	7.629	7.535	7.896	8.027	6.714	7	8.294	7.384	6.81	7.831	7.382
SCNN1D	SCNN1D	6339	1	1215815	1227409	1p36.3-p36.2	NM_001130413.3	NP_001123885.2	5.081	6.133	5.301	5.415	5.848	5.763	5.569		5.202	5.82	5.418	4.927	5.207	5.08	5.788	5.297	5.011	5.108	5.394	5.208	5.03	5.31	5.268	5.391	5.262	5.165	5.418	5.616	5.078	5.439	5.34	5.463	5.221	5.389	5.317	5.343	5.374	5.368	5.454	6.063	5.186
ACAP3	ACAP3	116983	1	1227763	1243269		NM_030649.2	NP_085152.2	7.078	6.762	6.81	7.293	7.386	7.083	7.405	5.422	7.14	7.874	7.106	7.405	8.147	7.118	7.042	7.331	7.181	7.141	7.411	7.134	7.102	7.308	8.219	7.243	6.785	7.207	7.618	7.278	7.369	6.835	7.908	7.409	7.6	7.847	6.455	6.923	6.831	6.964	6.374	7.166	6.782
PUSL1	PUSL1	126789	1	1243993	1247057	1p36.33	NM_153339.1	NP_699170.1	7.111	6.713	6.818	7.004	6.87	7.594	6.889	5.622	7.088	6.703	7.218	7.757	7.92	7.526	7.468	7.606	7.276	6.486	6.885	7.247	7.774	7.277	7.425	8.031	7.095	6.755	7.108	6.867	7.504	6.711	8.238	7.526	7.691	7.339	6.597	6.985	7.311	6.415	6.281	7.682	7.449
CPSF3L	CPSF3L	54973	1	1246964	1260067	1p36.33	NM_001256463.1	NP_001243392.1	6.87	7.738	8.108	8.063	7.346	7.829	7.796	7.375	7.672	7.756	8.089	7.709	8.101	7.911	7.68	7.548	7.084	8.049	8.154	8.012	8.012	7.57	8.727	7.616	7.647	6.7	7.588	8.133	7.681	7.626	7.82	8.436	8.595		7.369	6.61	7.932	7.505	6.765	8.06	7.778
CPTP	CPTP	80772	1	1260142	1264276	1p36.33	NM_001029885.1	NP_001025056.1	6.218	6.625	6.668	6.889	6.568	7.054	6.824	5.38	6.782	6.723	6.932	6.868	7.396	6.205	6.96	6.681	6.147	5.884	5.895	5.693	6.427	5.887	7.705	6.47	6.772	6.52	6.756	7.174	7.337	6.71	7.328	6.559	7.64	7.363	5.902	6.115	6.94	6.445	6.219	7.153	6.746
TAS1R3	TAS1R3	83756	1	1266725	1270700	1p36.33	NM_152228.1	NP_689414.1	8.275	8.233	8.712	8.321	7.925	7.844	8.027		8.158	8.359	8.593	7.871	7.924	7.928	7.914	7.994	8.388	8.181	8.275	8.548	8.739	8.476	8.411	7.747	7.834	7.32	7.771	8.046	8.073	7.984	7.786	8.138	7.904	8.206	8.63	8.28	8.172	8.415	8.551	8.138	8.455
DVL1	DVL1	1855	1	1270657	1284492	1p36	NM_004421.2	NP_004412.2	8.025	8.427	8.333	8.244	8.047	8.295	8.244	7.023	7.952	8.078	8.399	8.389	8.815	8.871	8.607	8.839	8.615	8.243	7.591	7.927	8.559	7.577	8.223	8.168	8.18	7.585	8.248	8.059	8.359	7.929	8.578	8.291	8.474	8.251	7.839	8.001	8.837	8.425	7.856	8.197	8.968
MXRA8	MXRA8	54587	1	1288068	1298921	1p36.33	NM_032348.2	NP_115724.1	5.984	7.24	9.551	6.935	8.854	5.782	6.076	5.251	5.966	6.008	6.099	5.955	6.063	5.826	5.877	5.948	6.091	5.933	5.923	5.998	6.987	5.985	5.984	5.694	5.875	5.831	5.782	5.901	6.038	6.282	5.891	5.965	5.906	6.164	6.045	6.012	6.628	8.699	5.992	6.291	6.004
AURKAIP1	AURKAIP1	54998	1	1309109	1310818	1p36.33	NM_001127229.1	NP_060370.1	8.556	8.419	8.49	9.257	8.582	9.034	8.986	8.333	9.026	8.669	8.88	9.18	9.282	8.834	9.015	8.831	8.866	8.715	8.367	8.818	9.213	8.471	9.125	8.968	8.806	8.728	9.102	9.226	9.442	8.822	9.435	9.344	9.732	9.694	8.621	8.567	9.091	8.708	8.19	8.879	8.94
CCNL2	CCNL2	81669	1	1321090	1334718	1p36.33	NM_030937.4	NP_112199.2	7.738	7.289	8.109	8.086	8.172	8.569	7.801	6.214	8.294	8.87	8.261	7.303	8.01	8.402	8.386	8.89	7.523	8.098	8.047	8.184	8.267	8.252	8.107	8.425	7.302	7.718	8.875	7.753	8.573	7.731	9.399	8.154	8.238	7.908	7.326	7.877	8.223	8.319	7.558	8.455	8.073
LOC148413	LOC148413	148413	1	1334909	1337426	1p36.33			6.396	5.609	5.535	6.143	6.438	6.54	6.298	6.574	6.168	6.273	6.188	6.574	6.386	6.507	6.525	6.708	5.886	6.656	6.183	6.488	7.065	6.513	6.64	6.568	5.975	6.091	6.119	6.363	6.334	6.003	7.184	6.308	6.826	6.406	5.607	5.828	6.457	5.911	5.598	6.292	5.897
MRPL20	MRPL20	55052	1	1337275	1342693	1p36.3-p36.2	NM_017971.3	NP_060441.2	8.733	7.984	8.475	8.965	8.937	9.716	8.98	10.035	9.51	8.626	9.231	9.588	9.063	9.073	9.348	9.1	8.996	9.023	9.152	9.454	9.486	9.245	9.52	9.267	9.484	8.967	9.504	9.505	9.558	8.725	9.793	9.442	9.704	9.508	8.498	8.763	9.06	8.431	8.275	9.113	9.256
ANKRD65	ANKRD65	441869	1	1353799	1356824	1p36.33	NM_001243536.1	NP_001230464.1	6.433	6.616	6.706	6.673	6.209	6.028	6.226		6.588	6.194	6.921	6.412	6.068	6.081	6.217	6.126	6.563	6.223	6.754	6.606	7.217	6.6	6.639	6.048	6.21	5.818	5.942	6.375	6.419	6.453	6.207	6.706	6.646	6.594	6.811	6.7	6.271	6.897	6.992	6.66	7.015
VWA1	VWA1	64856	1	1370902	1378262	1p36.33	NM_022834.4	NP_073745.2	6.631	6.207	6.067	5.8	7.733	6.013	5.947	4.52	5.751	6.878	6.563	6.734	7.623	6.968	6.519	8.385	6.38	6.868	5.73	5.75	5.91	5.616	5.794	6.985	5.659	6.862	5.752	5.606	6.696	6.029	5.739	5.765	5.512	5.741	6.357	6.226	5.764	6.712	5.586	6.4	6.931
ATAD3C	ATAD3C	219293	1	1385068	1405538	1p36.33	NM_001039211.2	NP_001034300.2	4.751	4.684	4.617	4.753	4.767	4.805	4.787		4.829	4.673	4.683	4.85	4.92	4.727	4.842	4.954	4.723	4.769	4.812	4.866	5.081	4.952	5.92	5.249	4.93	4.765	4.638	4.98	4.876	4.72	5.106	5.059	5.04	5.603	4.674	4.71	4.954	4.832	4.576	5.038	4.751
ATAD3B	ATAD3B	83858	1	1407134	1431584	1p36.33	NM_031921.4	NP_114127.3	6.803	6.445	6.586	7.343	6.728	7.301	6.456	6.07	6.768	6.873	6.867	6.798	7.459	7.156	7.569	7.275	6.751	7.004	6.956	7.099	7.643	7.158	7.188	7.774	6.566	6.604	7.246	7.329	7.637	6.763	7.726	7.31	7.716	7.461	5.143	6.616	7.312	6.897	6.1	7.856	6.44
ATAD3A	ATAD3A	55210	1	1447522	1470067	1p36.33	NM_018188.3	NP_060658.3	6.26	6.58	6.665	7.581	5.563	7.188	6.924	6.846	6.966	7.301	7.068	7.59	7.05	7.05	7.024	7.029	7.502	7.374	7.052	7.986	8.395	7.387	8.009	6.912	6.867	5.795	7.417	7.179	8.14	6.601	7.778	7.484	7.774	7.322	5.797	6.145	7.382	6.923	5.702	7.12	6.524
SSU72	SSU72	29101	1	1477052	1510262	1p36.33	NM_014188.2	NP_054907.1	9.557	9.369	9.377	10.216	9.532	9.75	9.646	9.54	9.643	9.65	9.372	9.745	10.284	9.485	9.93	9.7	9.615	9.121	9.129	9.41	9.787	9.384	10.329	9.859	9.374	9.491	9.644	10.158	10.291	9.841	10.206	9.739	10.389	10.113	9.222	9.367	9.476	9.832	8.946	10.053	9.813
C1orf233	C1orf233	643988	1	1533387	1535476	1p36.33	NM_001242659.1	NP_001229588.1	7.705	6.245	5.929	7.203	5.703	5.71	5.76		5.773	7.498	5.604	5.949	7.946	6.273	5.56	5.539	6.551	5.852	5.929	6.915	6.305	5.997	7.234	5.44	5.561	6.829	7.359	6.27	6.517	6.865	6.805	6.37	5.422	5.617	6.402	6.953	6.15	5.948	6.342	7.888	6.448
MIB2	MIB2	142678	1	1550794	1565990	1p36.33	NM_001170687.1	NP_001164159.1	5.801	6.064	6.622	6.309	5.91	6.126	6.33	4.482	6.086	6.901	6.041	6.159	7.922	8.034	6.209	6.243	8.001	6.211	6.166	5.829	5.724	6.195	7.476	6.139	5.539	5.959	6.067	5.868	6.339	5.586	5.753	6.025	6.296	6.262	5.654	5.863	6.461	6.284	6.125	6.712	5.981
SLC35E2B	SLC35E2B	728661	1	1592938	1624243	1p36.33	NM_001110781.1	NP_001104251.1	7.951	7.379	7.647	7.795	8.279	8.047	7.474		7.487	8.159	7.627	7.331	7.973	7.693	8.719	8.086	7.474	8.322	8.493	7.901	7.738	7.904	7.56	7.61	7.502	7.221	8.332	7.488	7.993	7.381	8.314	7.002	7.496	7.291	6.841	7.135	7.675	7.532	6.973	7.928	7.301
CDK11A	CDK11A	728642	1	1633822	1656004	1p36.33	NM_024011.2	NP_076916.2	5.001	5.297	5.206	5.264	5.384	5.846	5.123		5.539	4.673	5.594		5.297	5.144	5.351	4.752	4.667	4.851	4.734	5.705	6.146	5.288	4.818	5.164	4.543	4.675	5.451	5.112	5.557	4.501	5.325	5.361	5.613		4.839	4.887	5.394	4.951	4.86	5.332	4.678
SLC35E2	SLC35E2	9906	1	1656276	1677438	1p36.33	NM_182838.2	NP_878258.1	5.745	5.321	5.143	5.436	6.437	5.943	5.885		5.548	5.597	5.497	5.496	6.08	5.748	6.113	6.213	5.21	6.086	5.904	5.659	5.014	5.755	5.107	5.968	5.738	5.791	5.972	5.331	5.762	5.119	6.087	5.21	5.899	5.351	5.191	5.696	5.731	5.421	5.27	5.522	5.675
NADK	NADK	65220	1	1682670	1711508	1p36.33	NM_001198994.1	NP_001185923.1	7.33	7.524	7.502	8.123	7.55	8.161	7.881	6.62	8.018	7.759	7.817	8.462	8.531	7.833	7.807	8.227	7.842	7.477	7.721	7.985	8.234	7.896	8.936	8.332	7.617	8.117	8.065	7.8	8.562	7.891	8.731	8.111	8.002	7.844	7.057	7.412	7.95	7.572	7.088	8.383	7.874
GNB1	GNB1	2782	1	1716723	1822556	1p36.33	NM_002074.3	NP_002065.1	10.174	10.67	11.223	11.498	10.375	11.723	11.161	10.954	11.47	11.152	11.403	10.783	10.89	11.018	10.913	10.938	10.897	11.022	11.048	10.756	10.439	10.557	10.715	11.028	10.685	11.016	11.388	10.855	11.533	10.345	11.494	10.997	11.011	10.888	10.38	10.777	11.453	10.814	10.468	11.265	10.615
CALML6	CALML6	163688	1	1846265	1848733	1p36.33	NM_138705.2	NP_619650.2	7.622	7.572	7.594	7.761	7.694	7.402	7.942		7.508	7.493	7.872	7.772	7.5	7.649	7.641	7.548	7.612	7.529	7.667	7.68	7.858	7.687	7.559	7.008	7.061	6.877	7.137	7.297	7.507	7.223	6.891	7.426	6.93	7.604	7.793	7.558	7.67	7.834	7.903	7.839	7.848
TMEM52	TMEM52	339456	1	1849028	1850740	1p36.33	NM_178545.3	NP_848640.1	6.17	5.77	5.362	5.398	5.597	5.672	5.237		5.283	5.173	5.44	5.539	6.423	7.069	6.312	5.625	6.285	5.756	5.301	5.441	6.514	5.432	7.047	5.424	5.361	5.249	5.221	5.258	5.436	5.369	5.124	5.39	5.153	5.621	5.61	5.468	5.558	5.676	5.43	5.865	5.271
GABRD	GABRD	2563	1	1950767	1962192	1p36.3	NM_000815.4	NP_000806.2														5.494																				4.823						5.082
PRKCZ	PRKCZ	5590	1	1981908	2116834	1p36.33-p36.2	NM_002744.4	NP_002735.3	7.654	6.837	5.865	5.738	7.979	6.142	6.468		6.255	6.79	6.532	8.122	8.762	8.225	8.649	8.078	8.206	7.913	5.779	6.178	6.122	5.909	7.069	6.135	6.387	8.246	8.567	8.059	8.402	7.409	7.902	8.122	6.739	7.032	7.245	7.228	7.698	5.866	7.385	7.926	7.732
LOC100506504	LOC100506504	100506504	1	2113245	2115491				5.647	5.327	5.414	5.318	5.18	5.502	5.782		5.478	5.71	5.581	5.166	5.745	5.445	5.096	5.667	5.431	5.39	5.35	5.536	5.186	5.135	4.947	5.535	5.421	5.283	5.526	5.428	5.186	5.024	5.051	5.25	5.388	5.105	5.575	5.044	5.625	4.915	5.414	5.417	5.12
FAAP20	FAAP20	199990	1	2115898	2144159	1p36.33	NM_182533.2	NP_001243875.1	6.614	6.59	6.827	7.294	6.396	7.635	7.137	7.373	7.219	7.072	7.36	6.686	7.329	7.334	7.52	7.047	6.815	6.998	6.888	6.195	7.264	6.872	6.657	7.662	7.043	6.986	7.47	7.375	7.62	6.772	7.386	7.183	7.782	7.346	6.345	6.756	7.286	6.777	6.455	7.744	6.773
SKI	SKI	6497	1	2160133	2241652	1p36.33	NM_003036.3	NP_003027.1	7.662	7.996	8.414	8.506	7.176	8.749	8.241	8.215	8.111	8.404	8.051	7.917	7.97	8.239	8.683	7.969	7.527	7.692	7.284	7.889	8.063	6.453	7.522	8.233	7.938	8.393	8.603	8.082	8.921	7.614	8.531	8.37	8.48	8.18	7.339	7.867	8.263	7.878	7.349	8.293	7.595
MORN1	MORN1	79906	1	2252691	2323190	1p36.33-p36.32	NM_024848.1	NP_079124.1	6.582	6.44	6.079	6.322	6.921	6.437	6.473		6.013	7.109	6.736	7.16	6.616	6.852	7.569	7.146	6.972	7.101	6.221	6.273	6.004	6.303	6.053	6.191	6.419	6.451	6.934	7.052	7.565	6.828	6.431	6.439	6.445	6.497	6.423	6.199	6.664	6.342	6.627	7.245	6.93
LOC100129534	LOC100129534	100129534	1	2281852	2284100	1p36.33			5.662	5.969	5.791	5.67	6.266	5.361	6.257		5.6	6.386	6.028	6.399	5.641	6.143	7.061	6.323	6.189	5.965	6.09	5.488	5.607	5.844	5.7	5.744	5.768	5.805	6.125	6.247	6.341	5.785	6.001	5.796	5.765	6.054	6.032	5.475	5.87	6.182	6.125	6.729	6.1
LOC100129110	LOC100129110	100129110	1	2296151	2296865	1p36.33			6.456	5.922	5.482	6.277	6.363	6.099	6.088		5.994	6.402	6.31	5.998	6.471	6.312	7.431	6.727	6.059	6.575	6.412	6.319	5.906	6.326	5.799	5.776	5.457	5.72	6.55	6.382	6.603	6.14	6.165	6.062	6.135	6.21	6.014	6.21	6.461	6.072	6.263	6.708	6.229
RER1	RER1	11079	1	2323213	2336885	1p36	NM_007033.4	NP_008964.3	8.146	8.321	8.63	9.249	8.64	9.316	9.263	9.346	9.35	9.303	9.114	9.278	8.98	8.762	9.556	8.79	8.457	8.385	8.188	8.568	8.966	8.103	8.829	9.238	8.963	8.851	9.257	9.534	9.897	8.769	9.554	9.223	9.79	9.458	8.138	8.563	9.228	8.537	8.321	8.906	8.753
PEX10	PEX10	5192	1	2336240	2344010	1p36.32	NM_002617.3	NP_002608.1	7.082	6.348	6.624	6.917	6.777	7.58	6.705	4.876	7.22	6.728	6.53	6.865	7.615	6.735	7.654	7.221	7.208	6.693	6.218	6.177	5.986	6.24	6.809	6.537	6.713	7.423	7.119	6.664	7.785	6.695	7.857	7.373	7.302	7.355	6.369	6.739	7.026	6.858	6.053	7.498	7.107
PLCH2	PLCH2	9651	1	2398897	2436969	1p36.32	NM_014638.2	NP_055453.2	5.006		4.827	4.65					4.616		4.462	4.762	5.125	4.856	5.198	5.104	4.582	4.883	4.526	4.647	4.702	4.584	4.628			4.444		4.806	4.51	4.557	4.613	4.674			4.56	4.667	4.811	4.569	4.969	5.757	5.379
PANK4	PANK4	55229	1	2439969	2458067	1p36.32	NM_018216.1	NP_060686.1	7.18	7.125	7.271	7.542	6.903	8.109	6.946	5.98	7.382	7.424	6.747	7.244	7.524	7.385	8.242	7.391	7.112	7.009	7.458	7.242	7.748	7.481	7.01	7.588	7.235	6.889	7.354	7.317	7.756	7.254	8.073	7.394	7.756	7.698	6.696	6.928	7.458	6.977	6.697	7.824	7.351
HES5	HES5	388585	1	2460183	2461684	1p36.32	NM_001010926.3	NP_001010926.1	5.723	5.97	5.357	5.112	4.96	5.24	5.057		5.355	5.217	5.984	4.891	6.907	5.066	5.074	5.721	5.413	5.445	5.359	5.56	5.708	5.497	5.691	5.608	5.242	5.276	5.379	5.765	5.304	5.987	5.471	5.74	5.276	5.616	5.51	5.291	6.064	5.956	5.276	5.419	5.649
LOC100133445	LOC100133445	100133445	1	2487565	2488447	1p36			5.944	6.089	5.995	6.073	5.999	5.629	5.931		6.166	5.896	6.085	6.241	7.626	6.131	6.604	6.448	6.108	6.662	6.231	6.259	6.205	6.039	6.693	6.36	5.987	7.316	7.777	6.826	7.532	6.891	7.956	6.76	7.62	7.498	6.317	5.94	6.147	6.092	6.154	6.073	6.066
TNFRSF14	TNFRSF14	8764	1	2487803	2497061	1p36.32	NM_003820.2	NP_003811.2	5.952	6.248	5.979	5.889	6.142	5.867	6.134		5.893	6.03	6.091	6.338	7.017	5.772	6.37	6.785	6.338	6.3	6.663	6.308	6.026	6.721	6.669	6.705	6.26	8.253	8.989	7.452	9.316	8.315	9.512	7.553	8.713	8.527	5.931	5.727	6.224	6.385	6.289	6.243	5.84
LOC100996583	LOC100996583	100996583	1	2497973	2515973																6.583														4.558	4.476	4.831	4.712	4.637			4.596
FAM213B	FAM213B	127281	1	2517898	2522908	1p36.32	NM_152371.3	NP_001182669.1	8.07	8.035	7.614	7.595	7.493	8.027	8.122	4.734	7.997	8.13	7.074	7.892	9.7	8.098	8.959	8.941	8.282	7.978	7.386	7.44	7.239	7.92	7.542	7.69	7.197	8.701	8.497	8.236	8.468	6.994	8.811	7.341	8.762	8.611	7.342	7.108	8.162	8.07	6.532	7.571	6.422
MMEL1	MMEL1	79258	1	2522080	2564481	1p36	NM_033467.3	NP_258428.2	6.29	6.328	6.543	6.413	6.404	6.155	6.437		6.306	6.31	6.527	6.133	6.262	5.902	6.026	6.179	6.293	6.098	6.43	6.535	6.414	6.483	6.247	5.66	6.007	5.926	5.927	6.161	6.133	5.752	6.061	6.244	6.017	6.013	6.431	6.223	6.456	6.428	6.434	6.125	6.306
TTC34	TTC34	100287898	1	2572806	2706230	1p36.32	NM_001242672.1	NP_001229601.1	5.145	5.274	5.377	4.906		4.89	5.289		4.947	5.19	5.019	4.781	4.886	4.782	4.927	4.713	4.875	4.884	4.741	4.872	5.203	4.653	5.264	5.066	5.466	4.522	4.56	5.017	4.946	4.75	5.407	5.132		5.241	4.441	4.982	5.055	5.067	4.59	4.621	4.776
LINC00982	LINC00982	440556	1	2976180	2984289	1p36.32			5.033	5.288	5.474	5.341	5.131		4.888		5.416	5.359	5.485	5.068	5.196	5.395	5.193	5.017	5.6	5.664	5.407	5.18	5.513	5.368	5.399	5.216	5.128	4.506	5.236	5.543	5.045	5.154	5.23	4.892	4.889	5.553	5.451	5.259	5.669	5.414	5.792	5.406	5.294
PRDM16	PRDM16	63976	1	2985741	3355185	1p36.23-p33	NM_022114.3	NP_955533.2	5.775	5.44	5.456	5.402	5.438	5.519	6.433		6.346	6.2	6.049	5.52	6.05	6.207	5.818	5.353	5.997	6.652	5.437	5.466	5.403	6.168	5.468	5.152	5.469	5.26	5.267	5.324	5.353	5.7	5.304	5.46	5.428	5.628	5.51	5.375	5.479	5.442	6.245	5.611	5.498
ARHGEF16	ARHGEF16	27237	1	3371146	3397677	1p36.3	NM_014448.3	NP_055263.2	6.47	5.596	5.502	5.544	6.458	5.34	5.431		5.567	5.411	5.41	7.03	7.556	6.516	7.275	7.303	7.226	6.565	5.474	5.488	5.473	5.396	5.602	5.269	5.376	6.438	5.391	5.403	5.472	5.637	5.66	5.478	5.377	5.591	5.745	5.797	5.879	6.177	5.617	6.043	6.407
MEGF6	MEGF6	1953	1	3404505	3528059	1p36.3	NM_001409.3	NP_001400.3	6.776	6.341	7.727	8.957	6.637	6.411	7.068	5.225	6.389	6.471	6.221	6.22	6.628	6.751	6.781	6.445	6.669	6.508	6.605	6.735	6.312	6.228	6.329	6.027	6.143	6.424	6.553	6.295	6.335	6.303	6.346	6.134	6.079	6.301	6.579	6.603	6.479	7.581	7.627	6.62	6.446
TPRG1L	TPRG1L	127262	1	3541555	3546694	1p36.32	NM_182752.3	NP_877429.2	6.372	6.1	6.827	6.734	7.084	6.871	6.529		5.784	6.656	6.059	7.908	7.611	6.861	6.558	7.753	6.734	6.142	5.703	6.046	5.366	5.751	6.627	6.077	6.276	6.842	7.111	7.207	8.036	6.212	6.944	6.686	7.27	7.188	5.541	6.195	6.535	6.166	6.623	6.805	6.475
WRAP73	WRAP73	49856	1	3547330	3566671	1p36.3	NM_017818.3	NP_060288.3	6.511	6.256	6.317	6.795	6.704	7.459	6.668	5.278	6.783	6.905	6.685	6.88	7.184	7.693	7.511	7.331	7.518	6.891	6.882	6.872	6.951	7.046	6.619	7.622	6.458	6.398	7.112	7.065	7.335	6.272	7.108	6.499	7.936	7.412	6.081	5.904	6.998	6.372	6.083	7.366	6.408
TP73	TP73	7161	1	3569128	3652765	1p36.3	NM_001126240.2	NP_001191120.1	7.36	6.548	6.186	6.168	7.391	7.077	6.727		7.715	7.021	6.777	6.692	6.131	7.652	7.731	7.55	7.201	6.471	6.545	6.56	6.489	6.706	6.133	6.383	5.992	5.937	6.728	6.103	7.433	6.235	7.53	6.153	5.912	6.01	6.186	6.036	6.553	6.107	6.129	7.067	6.893
TP73-AS1	TP73-AS1	57212	1	3652547	3663937	1p36.32			5.333	6.801	6.041	7.44	7.089	7.844	7.176	4.58	6.768	7.201	7.374	5.366	5.364	5.202	5.21	5.345	5.435	5.33	7.079	5.619	7.702	7.499	5.75	6.805	5.303	7.26	7.414	5.252	7.89	5.872	8.045	5.656	5.346	5.547	6.873	6.791	7.584	6.139	7.222	7.695	5.764
CCDC27	CCDC27	148870	1	3668964	3688209	1p36.32	NM_152492.2	NP_689705.2	6.551	6.512	6.511	6.582	6.079	5.927	6.169		6.344	6.103	6.732	6.392	6.25	5.754	6.044	6.111	6.225	6.007	6.49	6.557	6.69	6.533	6.455	5.7	5.774	5.559	5.591	5.655	6.255	5.937	5.777	6.253	5.97	6.119	6.546	6.265	6.481	6.386	6.592	6.476	6.632
SMIM1	SMIM1	388588	1	3689324	3692546	1p36.32	NM_001163724.1	NP_001157196.1																					5.699
LRRC47	LRRC47	57470	1	3696783	3713068	1p36.32	NM_020710.2	NP_065761.1	8.553	8.295	8.786	9.348	8.491	9.494	8.872	9.855	8.971	8.897	8.884	8.954	9.118	8.858	8.983	8.588	8.829	8.764	8.746	9.055	9.175	8.951	8.911	8.939	8.693	8.573	8.962	9.077	9.442	8.592	9.316	9.172	9.641	9.346	8.426	8.4	8.885	8.565	8.27	8.982	8.431
CEP104	CEP104	9731	1	3728644	3773797	1p36.32	NM_014704.3	NP_055519.1	7.693	7.188	7.851	7.768	7.712	8.234	8.31	6.849	7.694	8.176	7.656	7.996	8.176	7.746	8.303	7.768	7.589	7.791	8.045	7.666	7.964	8.036	8.267	8.152	7.736	8.121	8.376	8.197	8.517	7.436	8.474	8.415	8.243	8.04	7.019	7.689	8.135	7.466	7.034	8.204	7.125
DFFB	DFFB	1677	1	3773830	3801993	1p36.3	NM_004402.2	NP_004393.1	6.158	5.441	5.906	6.235	5.415	6.399	6.03		5.915	6.143	5.914	6.997	7.091	6.642	7.069	6.268	6.514	6.514	6.343	7.299	6.734	6.321	6.643	6.588	5.983	6.082	6.903	6.167	6.658	5.914	6.789	6.158	7.051	6.699	5.589	5.474	5.698	5.636	5.169	5.723	5.213
C1orf174	C1orf174	339448	1	3805696	3816857	1p36.32	NM_207356.2	NP_997239.2	7.491	7.626	7.879	8.402	6.981	8.732	7.94	8.095	8.019	7.987	7.88	8.489	7.951	8.281	8.374	7.849	8.195	7.884	8.365	8.395	8.43	8.043	7.787	7.671	8.195	7.51	8.477	8.246	8.621	7.879	8.566	8.097	8.371	8.29	7.504	7.551	8.264	7.883	7.251	8.564	8.006
LINC01134	LINC01134	100133612	1	3816967	3832011	1p36.32			5.67	5.793	5.426	5.321	5.453	5.258	5.679		5.867	5.531	5.413	5.758	5.937	5.193	5.583	5.681	5.924	7.062	5.67	5.819	5.451	5.822	5.878	4.899	5.322	5.439	6.345	5.482	5.878	5.529	6.011	5.408	5.55	5.918	5.755	5.645	5.758	5.763	5.742	5.518	5.691
LINC01346	LINC01346	728716	1	4000671	4012643	1p36.32																				6.653																4.948
AJAP1	AJAP1	55966	1	4715104	4843851	1p36.32	NM_018836.3	NP_061324.1							4.866			5.177															8.196											4.475				4.581
NPHP4	NPHP4	261734	1	5922867	6052533	1p36	NM_015102.3	NP_055917.1	6.774	6.374	6.864	6.925	6.879	6.792	6.888		6.438	7.034	6.555	7.163	6.952	6.906	6.737	7.065	6.93	6.896	6.485	7.15	7	7.151	6.82	8.249	6.669	7.206	7.838	7.231	7.669	6.751	7.435	7.346	7.593	7.405	6.494	6.478	6.781	6.483	6.391	7.094	6.465
KCNAB2	KCNAB2	8514	1	6052357	6161253	1p36.3	NM_172130.2	NP_001186792.1	6.145	5.586	5.561	5.592	5.832	5.557	6.439		5.972	6.648	6.874	8.246	7.464	6.518	6.517	6.233	6.561	7.613	7.875	9.67	5.787	8.399	8.219	9.175	8.133	9.617	8.72	8.558	10.2	9.027	10.108	5.579	6.047	6.387	6.45	5.664	6.252	7.556	6.535	6.476	6.032
LOC100131864	LOC100131864	100131864	1	6160102	6161094	1p36.31				5.046	5.23	4.611	4.459		4.51		4.923	4.502	4.862	4.471					4.717	4.491	4.597	4.597	4.903		4.559		4.472				4.587			4.445	4.622	4.728	4.533	4.726	4.926	4.936	4.675	4.541	4.845
CHD5	CHD5	26038	1	6161846	6240194	1p36.31	NM_015557.2	NP_056372.1	5.199	5.091	5.08	5.202	5.371	5.014	5.076		5.122	4.903	5.121	5.008	5.068	5.831	4.914	5.023	5.174	5.24	5.178	5.211	5.179	5.245	5.196	4.912	5.273	4.805	4.947	4.948	5.064	5.173	4.889	5.217	4.976	5.126	5.112	5.006	5.157	5.017	5.252	5.833	5.042
RPL22	RPL22	6146	1	6245079	6259679	1p36.31	NM_000983.3	NP_000974.1	10.468	9.946	10.34	10.809	10.582	10.92	10.238	11.233	10.623	10.503	10.63	11.258	10.837	10.934	10.661	10.968	11.143	11.204	9.814	11.551	10.967	10.828	11.046	10.738	10.63	10.613	10.812	10.638	10.969	10.44	11.099	10.544	10.725	10.266	10.116	10.017	10.75	10.548	10.004	10.867	10.414
RNF207	RNF207	388591	1	6266188	6281359	1p36.31	NM_207396.2	NP_997279.2	6.138	6.098	6.153	5.728	6.627	5.209	5.606		5.419	5.445	6.029	5.676	6.596	7.174	7.208	6.519	6.356	6.505	5.531	5.904	6.38	5.398	6.902	6.916	5.384	5.777	7.214	6.382	7.321	6.471	7.663	6.916	7.376	7.361	6.388	7.254	6.387	6.002	6.374	6.902	7.262
ICMT	ICMT	23463	1	6281252	6296044	1p36.21	NM_012405.3	NP_036537.1	7.448	8.01	8.547	8.352	8.051	9.112	8.501	7.337	8.578	8.751	8.34	8.766	8.459	8.257	8.025	8.635	8.225	7.77	7.1	7.925	7.88	8.041	7.528	9.343	7.557	8.602	8.96	8.144	9.054	8.003	9.027	7.889	8.433	8.33	7.766	7.788	8.297	8.099	7.864	8.662	8.237
LINC00337	LINC00337	148645	1	6296299	6299502	1p36.31			4.841		4.479	4.647	4.675				4.678		4.43		4.766	4.829	4.61	4.542	4.514	4.725	4.575		4.571	4.965	4.618	5.268		4.776	4.616	4.688	4.688	4.648	4.824	4.688	4.672	5.262	4.63	4.879	4.726	4.686		6.691	5.49
GPR153	GPR153	387509	1	6307405	6321035	1p36.31	NM_207370.2	NP_997253.2	5.653	5.624	5.391	5.625	5.776	5.205	5.612		5.619	6.66	5.533	6.054	5.981	5.665	5.284	5.686	5.612	6.323	5.297	5.1	5.238	5.375	5.286	6.036	5.653	7.174	5.832	5.559	7.123	5.77	6.792	6.275	6.225	6.239	5.231	5.763	5.366	5.909	5.526	7.273	5.461
ACOT7	ACOT7	11332	1	6324331	6453826	1p36	NM_007274.3	NP_863655.1	6.667	7.992	7.973	7.944	7.368	8.72	8.321	7.361	8.799	8.046	8.745	8.981	7.918	8.697	7.879	6.891	7.943	7.998	7.94	7.442	7.703	8.125	7.989	8.128	8.31	9.162	9.842	9.292	10.269	8.379	9.427	8.891	9.386	9.202	7.595	7.097	8.777	8.109	7.036	8.135	7.94
HES2	HES2	54626	1	6475293	6479979	1p36.31	NM_019089.4	NP_061962.2	5.384	5.272	4.85	5.072	5.085	5.189	4.992		4.99	4.886	4.967	5.915	5.096	6.17	5.026	5.169	5.418	5.931	5.174	4.928	5.117	4.932	4.53	4.901	4.829	5.643	4.675	4.68	5.221	5.422	5.155	4.929	5.108	5.33	5.191	4.925	4.988	5.355	5.703	4.851	5.33
ESPN	ESPN	83715	1	6484847	6521004	1p36.31	NM_031475.2	NP_113663.2	4.832				5.804									5.812				5.661
TNFRSF25	TNFRSF25	8718	1	6521213	6526255	1p36.2	NM_148967.1	NP_683866.1	7.015	5.839	6.378	5.574	6.314	5.642	6.09		6.304	5.749	6.358	6.146	6.618	6.655	6.944	6.32	6.209	6.591	5.73	5.381	5.301	5.706	7.208	5.478	6.291	5.532	5.408	5.45	5.491	5.681	5.442	5.588	5.334	6.112	5.597	5.628	6.447	6.831	5.996	5.997	5.862
PLEKHG5	PLEKHG5	57449	1	6526151	6580121	1p36.31	NM_001042663.1	NP_001036128.1	6.879	6.124	6.81	5.883	6.804	5.944	6.5		6.609	5.809	6.705	6.334	7.263	7.181	7.051	6.484	6.457	6.968	5.529	5.727	5.788	5.901	5.864	5.916	7.061	6.136	5.763	5.727	5.939	6.172	5.825	6.079	5.861	5.918	5.859	5.883	6.796	7.216	6.466	6.203	6.306
NOL9	NOL9	79707	1	6581406	6614658	1p36.31	NM_024654.4	NP_078930.3	7.159	7.358	7.789	7.904	7.358	8.613	7.774	5.953	7.932	7.759	7.77	7.647	7.747	8.024	8.38	7.665	7.165	7.899	6.796	7.763	8.808	7.899	8.214	8.193	7.929	7.698	7.948	7.889	8.447	7.651	8.323	8.232	8.029	7.903	7.288	7.518	8.307	7.565	6.872	8.118	7.066
TAS1R1	TAS1R1	80835	1	6615337	6639817	1p36.23	NM_177540.2	NP_619642.2	5.319	5.475	5.336	5.117	4.895	4.868	4.873		5.458	4.94	4.888	4.498	5.003	4.572	4.694	5.138	4.991	4.77	5.155	5.419	5.125	4.907	4.702	5.029	5.162	4.8	4.534	5.027	5.162	4.961	4.964	4.944	4.753	5.192	4.949	4.976	5.448	5.066	5.476	5.137	5.023
ZBTB48	ZBTB48	3104	1	6640050	6649340	1p36.3	NM_005341.3	NP_005332.1	5.748	5.282	5.374	6.051	5.78	5.972	5.794		5.784	5.719	6.121	5.711	5.828	6.17	6.044	5.893	6.01	5.887	5.301	6.737	6.694	6.124	6.447	6.359	5.753	5.91	5.797	6.19	6.132	5.677	6.112	6.287	6.158	6.029	5.34	5.547	5.972	5.55	5.287	6.482	5.685
KLHL21	KLHL21	9903	1	6650783	6662958	1p36.31	NM_014851.2	NP_055666.2	6.231	6.74	7.515	6.644	6.506	7.759	7.667	6.322	7.406	7.591	7.547	6.59	6.747	7.173	7.038	6.99	7.396	6.936	6.235	7.43	7.33	6.903	7.306	7.164	7.024	7.148	9.055	8.518	9.035	6.719	7.793	7.855	8.412	8.122	6.257	6.456	7.439	7.506	6.484	6.78	6.138
PHF13	PHF13	148479	1	6673755	6684093	1p36.31	NM_153812.2	NP_722519.2	7.957	7.571	7.846	8.349	7.959	8.737	7.832	9.249	7.868	8.363	7.753	7.214	7.597	8.149	8.193	8.311	7.355	7.144	6.912	7.261	8.122	7.373	7.335	7.749	7.837	7.64	7.967	7.974	8.465	7.519	7.895	7.839	8.071	7.827	6.987	7.235	8.233	7.361	6.835	8.712	7.211
THAP3	THAP3	90326	1	6684924	6695646	1p36.31	NM_138350.3	NP_612359.2	4.634		4.576	4.603	4.427	4.755	4.498		4.795	4.527	4.869		4.685	4.869	4.601	4.469	4.925	4.527			4.952	4.915	4.49	5.064			4.691	4.466	4.717	4.78	5.076	5.287		4.543	4.502	4.554	5.023	5.126	4.461		4.783
DNAJC11	DNAJC11	55735	1	6694227	6761966	1p36.31	NM_018198.3	NP_060668.2	7.893	7.71	7.545	8.609	7.808	8.786	8.329	5.876	8.179	8.104	8.152	8.755	8.559	8.547	8.424	8.356	8.042	8.296	7.241	8.614	8.856	8.262	8.365	8.388	8.172	8.15	8.535	8.107	8.974	8.146	8.776	8.678	8.579	8.406	7.663	7.946	8.37	7.702	7.431	8.576	7.883
CAMTA1	CAMTA1	23261	1	6845383	7829766	1p36.31-p36.23	NM_001242701.1	NP_001229630.1	4.851	4.503	5.178	6.191	4.427	5.299	5.066		5.683	5.46	4.89	4.663	4.835	5.781	4.701	4.698	4.474		4.502	4.699	4.636	4.47	4.52	4.809	4.526		5.865	5.313	5.173	4.984	4.424	4.605	5.476	5.336	4.728	4.984	5.06	4.863	4.868	5.386	4.486
LOC100129476	LOC100129476	100129476	1	7032588	7034350	1p36.31			6.092	5.728	5.857	5.512	5.253	4.843	5.679		5.663	5.766	5.732	5.593	4.959	5.059	5.427	5.657	5.617	5.418	5.676	5.559	5.966	5.221	5.61	5.164	5.133	5.148	5.037	5.566	5.676	5.116	5.451	5.624	5.196	5.869	5.593	5.116	5.712	5.289	5.066	5.369	5.673
VAMP3	VAMP3	9341	1	7831328	7841492	1p36.23	NM_004781.3	NP_004772.1	7.568	8.954	9.62	9.467	8.571	9.514	9.421	8.608	8.82	9.636	8.739	8.324	8.966	8.97	8.718	8.91	8.502	7.656	7.489	7.499	7.853	6.931	7.731	8.485	8.791	9.276	9.291	9.009	10.001	8.615	9.758	9.034	8.999	8.764	8.393	8.426	8.745	9.051	8.723	9.21	8.204
PER3	PER3	8863	1	7844488	7905240	1p36.23	NM_016831.1	NP_058515.1	7.339	6.797	7.655	7.12	7.157	7.153	7.116	7.212	7.928	8.761	6.203	7.111	6.574	6.093	5.736	6.112	5.413	5.413	5.545	5.325	6.734	6.646	4.644	6.822	5.601	6.624	7.927	6.431	8.221	7.66	7.848	5.502	7.964	7.802	5.712	5.288	6.393	6.436	5.795	6.666	7.359
UTS2	UTS2	10911	1	7907671	7913551	1p36	NM_006786.3	NP_006777.1																																								4.821
TNFRSF9	TNFRSF9	3604	1	7975930	8003225	1p36	NM_001561.5	NP_001552.2		5.05	5.446				6.395	6.399	4.438	4.573	5.033													6.826	5.222										4.585		5.504	5.522	5.828
PARK7	PARK7	11315	1	8021713	8045342	1p36.23	NM_007262.4	NP_001116849.1	9.557	9.538	9.931	10.218	9.756	10.26	10.096	11.998	10.351	10.387	10.281	10.315	9.976	10.094	10.188	9.857	9.939	10.071	9.901	10.129	10.188	9.811	10.643	10.465	9.777	10.149	10.592	10.54	11.174	9.832	10.885	10.658	10.515	10.369	9.612	9.836	10.408	9.961	8.988	10.33	10.005
ERRFI1	ERRFI1	54206	1	8071778	8086393	1p36	NM_018948.3	NP_061821.1	6.303	9.546	8.69	9.469	7.057	8.549	8.759	8.828	9.048	8.179	9.379	8.289	7.971	10.485	8.958	9.123	9.955	8.215	4.533		4.592	4.503	4.663	8.204	10.165	6.303	6.352	7.973	7.02	6.605	5.966	8.238	7.831	7.46	8.61	7.828	9.442	8.67	6.363	10.806	9.913
SLC45A1	SLC45A1	50651	1	8378144	8404227	1p36.23	NM_001080397.1	NP_001073866.1	4.981	5.211	5.362	5.219	5.167	5.541	5.721		5.689	5.487	5.481	5.041	5.051	6.324	5.273	4.96	5.404	5.006	4.981	5.022	5.023	5.044	5.137	5.078	5.166	5.074	4.89	4.994	5.108	5.089	4.933	5.146	4.906	5.501	5.948	5.332	5.291	5.923	4.876	7.621	4.925
RERE	RERE	473	1	8412463	8877699	1p36.23	NM_001042681.1	NP_001036147.1	7.524	6.735	7.847	7.823	7.459	7.87	7.325	6.361	7.633	7.844	7.493	7.13	7.467	7.269	7.487	7.903	6.995	8.073	6.717	6.968	7.14	6.447	8.285	7.154	7.178	7.91	8.041	7.653	8.656	7.634	8.419	7.994	8.009	7.821	7.124	7.232	7.711	7.326	6.618	8.14	7.427
RPL7P7	RPL7P7	644896	1	8846187	8847009	1p36.23																																	4.772
ENO1	ENO1	2023	1	8921058	8939151	1p36.2	NM_001201483.1	NP_001188412.1	9.994	11.205	11.285	11.813	10.372	11.573	10.94	12.845	11.823	11.628	11.725	10.542	10.73	11.09	10.919	10.718	10.782	10.905	10.631	10.941	10.953	10.53	10.928	11.468	10.451	9.722	11.449	11.28	11.825	11.057	11.323	11.547	11.413	10.654	11.02	10.916	11.306	11.11	10.598	10.636	10.845
HMGN2P17	HMGN2P17	100113373	1	8953469	8954661	1p36.23			10.932	10.195	10.151	10.604	10.365	11.061	10.51		11.17	10.59	10.825	10.491	10.207	10.224	10.896	10.608	9.937	10.423	11.22	10.957	10.417	10.984	10.272	10.861	10.429	10.394	10.642	10.419	10.09	9.978	10.752	10.088	10.263	10.058	9.575	9.41	10.611	9.955	9.967	10.226	10.143
CA6	CA6	765	1	9005892	9035148	1p36.2	NM_001215.3	NP_001206.2	5.426	5.923	6.01	6.295	5.402	5.014	5.152		5.571	5.347	5.912	5.234	5.458	4.821	5.513	5.181	5.014	5.153	5.604	5.565	5.908	5.972	5.35	4.858	5.153	5.177	5.349	5.847	5.693	5.371	5.703	5.849	5.011	4.996	5.746	5.142	5.76	5.46	5.727	5.62	5.545
SLC2A7	SLC2A7	155184	1	9063358	9086404	1p36.2	NM_207420.2	NP_997303.2	4.954	5.567	5.622	5.451	5.436	5.125	5.697		5.753	5.258	5.815	5.375	5.131	4.715	5.308	5.294	4.836	4.916	5.703	5.62	5.487	5.466	5.494	4.809	5.443	4.909	5.358	4.892	5.033	5.527	5.402	5.277	5.376	5.039	5.463	5.261	5.424	5.289	5.229	5.163	5.416
SLC2A5	SLC2A5	6518	1	9097004	9129887	1p36.2	NM_003039.2	NP_001129057.1	4.439		5.689	4.715	4.495		4.533		4.49	6.917	4.65		4.447				4.505		4.479	7.813	4.561	4.442	5.411		4.647			4.435	4.43	4.453		4.524	4.448	4.709		5.121	4.48	4.51	4.594	4.704	4.438
GPR157	GPR157	80045	1	9164475	9189229	1p36.23	NM_024980.4	NP_079256.4	5.61	5.645	5.536	5.402	6.585	5.17	5.302		5.444	5.901	5.583	7.472	5.64	5.497	5.816	5.753	5.324	5.67	4.66	4.777	4.736	4.913	5.439	5.147	5.326	5.432	5.801	5.705	7.02	5.93	6.462	6.066	6.243	5.743	5.331	6.284	5.674	5.415	5.059	5.484	5.438
MIR34A	MIR34A	407040	1	9211726	9211836	1p36.22|1p36.22			5.077	4.613	4.701	4.658	5.828	4.514	4.531		4.649	5.358	4.798	4.987	4.448	5.289	4.992	5.592	4.588	4.82	4.646	4.636	4.687	4.614	4.857	4.783	4.943	5.658	4.664	4.629	6.056	4.691	7.175	5.901	4.506	4.782	5.09	4.994	4.827	5.085	5.787	5.953	5.107
H6PD	H6PD	9563	1	9294862	9331394	1p36	NM_004285.3	NP_004276.2	6.038	6.834	6.46	6.278	6.226	6.685	6.399	4.428	6.079	8.093	5.976	7.794	6.988	6.156	6.631	6.453	6.07	7.229	6.34	6.196	5.128	6.03	6.124	6.877	6.22	7.013	6.581	6.255	6.945	6.224	6.712	6.468	5.786	5.744	6.076	6.709	6.519	7.346	5.888	7.088	6.758
SPSB1	SPSB1	80176	1	9352940	9429590	1p36.22	NM_025106.3	NP_079382.2	5.448	6.279	6.781	6.425	5.414	6.668	6.873	5.317	5.952	7.763	6.233	8.304	7.205	6.319	5.93	6.52	6.249	6.448	5.804	5.111	5.018	5.903	6.144	7.653	6.437	7.806	8.611	6.705	9.225	6.817	7.823	7.594	8.394	8.155	6.832	6.709	6.894	6.287	6.775	6.446	7.244
SLC25A33	SLC25A33	84275	1	9599527	9642831	1p36.22	NM_032315.2	NP_115691.1	6.493	6.294		7.73	6.971	7.831	6.725	5.33	7.24	6.589	7.088	8.246	7.953	7.435	7.676	6.822	6.779	7.021	7.178	7.633	8.139	7.346	7.552	7.221	6.974	7.28	7.7	7.627	8.293	7.176	8.28	7.432	7.637	7.484	5.709	6.256	7.305	5.727	5.73	7.3	6.699
RPL9P11	RPL9P11	642740	1	9636462	9637138	1p36.22			4.67	4.609		5.221	5.205	5.402			4.662	5.243	4.88	4.693	5.495	5.1	6.994	5.069	4.605	5.046	5.098	5.159	5.292	5.364	4.885	5.172		4.944	5.788	5.048	5.596	5.108	5.416	5.229	5.194	5.559	4.594	4.508	5.062	4.825	4.672	5.177	4.838
TMEM201	TMEM201	199953	1	9648931	9674935	1p36.22	NM_001130924.2	NP_001010866.1	7.145	7.168	7.036	7.661	6.873	7.629	7.134		7.227	7.339	7.133	7.549	7.367	7.345	7.78	7.555	6.861	7.393	7.618	7.525	7.558	7.508	7.442	7.333	7.089	7.146	7.768	7.594	8.077	7.084	8.255	7.763	8.065	7.751	6.718	6.898	7.5	6.764	6.558	7.612	6.741
PIK3CD	PIK3CD	5293	1	9711789	9789172	1p36.2	NM_005026.3	NP_005017.3	5.463	6.211	6.788	6.354	5.596	7.359	6.218		6.519	5.973	6.649	5.411	5.583	6.152	5.392	5.403	5.538	5.942	7.143	8.377	6.673	6.511	5.704	5.344	7.226	8.729	6.67	7.43	8.619	6.617	8.354	5.467	5.616	6.047	5.998	6.211	7.347	6.057	6.472	6.22	5.557
PIK3CD-AS1	PIK3CD-AS1	644997	1	9712667	9714644	1p36.22			5.112	5.655	5.472	5.114	5.491	5.307	5.643		5.426	5.142	5.393	5.205	5.233	5.04	5.093	4.601	5.375	5.521	5.185	5.398	5.42	5.512	5.241	5.015	5.16	5.227	5.255	5.112	5.123	5.602	4.852	5.261	5.027	5.364	5.395	5.149	5.437	5.186	5.502	5.339	5.339
CLSTN1	CLSTN1	22883	1	9789078	9884584	1p36.22	NM_001009566.1	NP_001009566.1	8.551	8.57	9.766	9.339	8.736	9.38	9.197	8.711	9.405	9.65	9.25	8.656	8.416	9.181	9.173	9.504	9.232	8.304	8.403	7.886	7.094	8.748	8.468	8.742	8.799	9.094	9.101	8.97	10.038	8.679	9.358	9.007	8.786	8.453	8.145	9.044	9.498	9.293	8.495	9.659	9.029
CTNNBIP1	CTNNBIP1	56998	1	9908333	9970316	1p36.22	NM_020248.2	NP_001012329.1	6.354	6.906	6.242	6.401	6.921	6.774	5.622	5.753	6.168	6.865	6.115	8.283	5.914	6.608	6.61	6.829	6.504	7.082	6.412	6.753	6.301	6.558	6.023	5.372	5.891	6.717	7.17	6.687	7.543	6.163	6.786	6.458	6.853	6.801	5.843	6.306	6.941	7.331	5.932	7.057	7.593
LZIC	LZIC	84328	1	9982170	10003485	1p36.22	NM_032368.3	NP_115744.2	7.483	7.586	8.028	8.156	8.044	8.696	7.798	6.628	8.197	8.314	7.935	8.627	8.664	8.056	8.347	7.886	8.101	7.779	8.512	8.1	8.556	8.293	8.378	7.442	7.608	7.721	8.73	8.777	8.887	7.976	9.192	8.452	8.673	8.493	7.338	7.971	8.117	7.739	6.357	8.845	8.32
NMNAT1	NMNAT1	64802	1	10002980	10045556	1p36.22	NM_022787.3	NP_073624.2	5.177	5.264	5.354	5.549	4.998	6.092	5.308	4.657	4.842	6.099	4.842	6.049	6.156	5.613	5.887	4.645	6.183	5.368	4.95	5.245	5.753	5.047	5.036	4.79		5.964	6.44		7.334	4.583	5.441	5.329	5.319	5.949		4.824	5.4	4.729	4.474	5.611	4.801
RBP7	RBP7	116362	1	10057254	10076078	1p36.22	NM_052960.2	NP_443192.1					6.977	4.897								7.71																							5.466			6.076
UBE4B	UBE4B	10277	1	10093040	10241296	1p36.3	NM_001105562.2	NP_006039.2	8.18	7.764	8.336	8.247	7.751	8.414	8.338	6.311	8.132	8.536	8.369	8.56	8.323	8.48	8.574	8.428	8.284	8.379	7.696	8.159	8.796	7.787	8.619	8.06	7.869	8.072	9.084	8.518	9.27	7.995	8.989	8.678	8.653	8.709	7.619	8.202	8.462	7.993	7.272	9.2	8.428
PGAM1P11	PGAM1P11	100420660	1	10118730	10119711				4.608	4.725	4.864	5.207			5.184		4.822	4.817	5.443	5.197	5.168	4.584	4.632	4.767	4.766	5.184	4.76	5.146	4.743	5.14	5.126	4.608		4.787		4.789	5.045		4.649	4.853		4.906	4.83	4.667	4.698	5.183	5.04	4.737	4.447
KIF1B	KIF1B	23095	1	10270763	10441661	1p36.2	NM_183416.3	NP_055889.2	7.212	7.54	7.583	7.425	7.593	8.568	8.159	4.927	8.204	7.927	7.785	7.713	8.367	8.207	8.598	8.065	8.625	8.082	6.491	6.352	7.102	6.544	7.19	7.208	7.785	8.37	8.174	7.626	8.809	8.241	8.642	7.897	7.992	7.886	7.355	8.143	7.599	8.015	7.685	8.586	7.792
PGD	PGD	5226	1	10459048	10480568	1p36.22	NM_002631.2	NP_002622.2	10.021	9.479	9.098	10.789	10.135	10.364	10.638	9.425	10.819	10.161	10.28	10.508	11.51	10.553	10.314	10.37	10.461	10.476	10.277	10.736	10.981	10.394	10.79	9.776	9.619	9.375	10.028	9.802	10.052	9.337	10.208	9.94	10.076	10.016	12.049	10.242	11.123	9.705	10.425	9.645	11.59
DFFA	DFFA	1676	1	10520602	10532613	1p36.3-p36.2	NM_213566.1	NP_998731.1	6.726	6.953	7.371	7.651	6.595	7.611	7.229	6.616	7.187	7.262	7.428	7.535	7.919	7.563	7.73	7.087	7.832	7.264	7.17	7.356	8.019	7.24	7.595	7.357	8.106	7.106	7.476	7.795	8.393	7.429	8.154	7.523	8.143	7.717	6.969	6.732	7.807	7.175	6.303	8.543	7.12
PEX14	PEX14	5195	1	10535002	10690815	1p36.22	NM_004565.2	NP_004556.1	6.23	6.698	6.911	7.136	6.665	7.352	7.263	6.931	6.906	7.003	7.408	7.378	7.245	7.179	7.144	7.07	7.35	7.206	6.929	6.982	7.81	6.628	6.982	6.977	6.916	6.25	6.869	6.715	7.864	6.584	7.532	6.994	7.117	7.11	6.605	6.509	7.482	6.815	6.551	7.572	7.041
CASZ1	CASZ1	54897	1	10696665	10856733	1p36.22	NM_001079843.2	NP_001073312.1	7.224	5.861	5.471	6.276	7.582	6.172	5.584		5.759	5.529	5.906	7.239	6.894	5.615	6.238	6.891	6.3	6.895	5.65	5.575	5.547	5.68	5.38	5.58	5.5	5.456	5.376	5.3	5.471	5.76	5.513	5.401	5.613	5.775	5.636	6.032	5.595	5.582	5.757	5.678	5.717
C1orf127	C1orf127	148345	1	11006529	11042094	1p36.22	NM_001170754.1	NP_001164225.1	5.991	6.322	6.281	6.179	5.824	5.465	6.091		6.367	5.784	6.398	5.963	5.979	5.659	5.82	5.87	5.96	5.824	6.085	6.251	6.495	6.221	5.901	5.54	5.657	5.553	5.849	5.582	6.007	6.014	5.927	6.234	5.495	6.158	6.299	6.058	6.321	6.299	6.264	5.963	6.201
CFL1P6	CFL1P6	390996	1	11045886	11051853	1p36.22			5.33	5.41	5.59	5.285	5.492	5.076	5.609		5.179	5.525	5.662	5.43	5.248	5.222	5.426	5.497	5.205	5.392	5.499	5.63	5.653	5.253	5.44	5.596	5.308	5.043	5.458	5.459	5.144	5.46	5.174	5.586	5.053	5.055	5.195	5.527	5.71	5.396	5.619	5.55	5.483
TARDBP	TARDBP	23435	1	11072678	11085549	1p36.22	NM_007375.3	NP_031401.1	6.382	6.61	6.481	6.974	6.582	7.354	6.691		7.267	7.203	6.664	6.662	6.175	7.272	7.533	6.993	6.156	7.38	7.31	7.114	6.567	7.268	6.499	7.089	6.681	6.873	7.426	7.036	7.188	6.72	7.465	6.554	6.974	7.136	6.18	6.105	6.112	7.156	6.372	8.182	6.954
MASP2	MASP2	10747	1	11086579	11107296	1p36.3-p36.2	NM_006610.3	NP_006601.2	5.108	5.546	5.574	5.469	5.295	5.066	5.237		5.43	4.69	5.648	5.316	5.247	5.049	5.386	5.227	5.429	5.353	5.623	5.586	5.562	5.494	5.215	5.158	5.15	5.125	5.416	5.141	5.3	5.387	5.455	5.698	5.212	5.495	5.497	5.227	5.372	5.796	5.118	5.535	5.662
SRM	SRM	6723	1	11114648	11120091	1p36-p22	NM_003132.2	NP_003123.2	9.945	10.214	10.667	10.747	9.449	10.652	10.647	9.253	10.481	10.152	10.324	9.411	10.366	10.084	10.453	9.86	9.499	10.051	10.334	10.92	10.811	10.381	11.448	10.455	9.931	10.445	10.549	11.068	11.091	10.447	11.075	11.199	11.181	11.174	9.95	10.045	10.794	10.345	9.742	10.815	9.556
EXOSC10	EXOSC10	5394	1	11126669	11159967	1p36.22	NM_002685.2	NP_001001998.1	8.227	8.408	8.339	8.95	8.307	9.17	8.411	6.938	8.598	8.809	8.43	8.593	8.609	8.872	8.976	8.72	8.635	8.573	8.54	8.758	9.041	8.666	8.475	9.244	8.436	8.543	9.443	8.869	9.697	8.711	9.432	8.852	9.227	9.017	7.992	8.141	8.73	8.291	7.884	8.976	8.346
MTOR	MTOR	2475	1	11166587	11322608	1p36.2	NM_004958.3	NP_004949.1	7.68	7.45	7.856	8.181	7.833	8.6	8.063	4.971	8.124	8.203	7.916	7.622	7.691	8.229	8.582	8.089	8.009	7.887	8.062	7.887	8.32	7.996	8.102	8.327	7.491	8.109	8.687	8.095	9.117	8.142	9.008	8.315	8.646	8.504	7.248	7.956	8.259	7.578	7.577	8.62	7.908
UBIAD1	UBIAD1	29914	1	11333254	11348491	1p36.22	NM_013319.2	NP_037451.1	5.918	6.314	6.122	6.169	6.171	6.512	6.237		6.302	6.021	6.108	6.332	6.165	6.027	6.472	6.163	5.901	6.051	6.345	6.87	7.038	6.197	7.496	6.921	6.156	5.932	6.371	6.77	7.327	6.2	6.471	6.564	7.285	7.35	5.985	6.178	6.651	5.903	5.771	7.038	6.149
PTCHD2	PTCHD2	57540	1	11539294	11597640	1p36.22	NM_020780.1	NP_065831.1	5.668	5.095	4.759	5.153	5.209	4.688	4.989		4.838	4.817	4.998	4.923	5.195	6.024	5.015	4.963	5.028	5.684	6.288	5.171	5.432	5.313	5.847	5.297	5.09	5.146	5.117	4.977	4.748	5.023	4.862	5.038	4.805	5.303	5.047	5.264	5.028	5.168	5.356	5.467	5.185
FBXO2	FBXO2	26232	1	11708417	11714888	1p36.22	NM_012168.5	NP_036300.2	4.623				5.709								6.07	7.591	6.271		4.567	4.884		4.496	4.493		4.576		4.502	5.968	4.663	4.508	5.344	4.626	4.567	4.588	4.544	4.472	4.597	6.905	4.666	6.092	6.764	7.437	4.914
FBXO44	FBXO44	93611	1	11714431	11723384	1p36.22	NM_183412.2	NP_904319.1	6.718	6.325	6.412	6.611	7.202	7.128	6.304		6.974	7.385	6.938	5.786	6.938	8.043	7.617	5.895	5.661	6.665	5.846	6.203	6.695	6.782	6.528	7.39	6.84	7.333	7.641	6.901	8.336	7.472	8.236	7.773	7.793	8.088	6.898	7.403	6.453	6.803	6.914	7.867	6.531
FBXO6	FBXO6	26270	1	11724149	11734409	1p36.22	NM_018438.5	NP_060908.1	5.657	5.171	4.933	5.506	6.367	5.339	5.084		4.983	5.067	5.396	4.948	5.646	7.028	5.533	4.626	5.011	4.991	4.826	5.876	7.232	5.032	5.232	7.246	5.463	5.981	5.745	5.566	7.345	4.983	6.338	6.87	5.011	5.162	5.739	5.966	5.287	5.694	5.756	6.865	5.896
MAD2L2	MAD2L2	10459	1	11734536	11751678	1p36	NM_006341.3	NP_001120797.1	8.739	9.3	9.371	9.875	8.593	9.812	9.763	8.753	9.684	9.769	9.423	8.473	8.671	9.687	9.478	8.332	8.966	9.455	10.236	9.486	10.296	10.269	9.442	9.848	9.264	9.61	9.693	9.262	10.063	9.011	9.982	9.549	9.731	9.568	8.478	8.851	9.586	9.391	8.352	9.975	8.665
DRAXIN	DRAXIN	374946	1	11751780	11780336	1p36.22	NM_198545.3	NP_940947.3	5.703	5.473	5.602	6.145	5.651	5.274	5.78		5.663	5.633	6.378	5.579	5.651	6.135	5.636	5.453	5.515	5.872	7.188	5.984	6.02	6.15	5.75	4.991	5.595	7.129	5.332	5.16	5.72	5.494	5.162	5.513	5.361	5.653	5.688	5.673	5.604	5.654	6.134	5.776	5.435
AGTRAP	AGTRAP	57085	1	11796141	11810828	1p36.22	NM_001040197.1	NP_001035284.1	6.124	6.078	5.84	6.312	6.884	5.921	7.065	7.2	5.633	6.843	6.127	6.844	6.619	6.845	6.653	6.36	6.875	5.832	5.246	7.784	7.469	5.224	7.416	6.621	6.958	7.264	6.655	7.25	7.879	7.509	7.285	6.951	6.694	6.379	6.998	6.961	7.225	7.324	6.842	7.888	6.124
C1orf167	C1orf167	284498	1	11822249	11849642	1p36.22			7.262	7.395	7.813	7.594	6.943	6.877	7.127		7.343	7.122	7.486	6.938	6.995	6.907	6.976	7.072	7.277	7.105	7.308	7.32	7.47	7.248	7.217	6.855	7.042	7.032	7.031	7.104	6.959	7.24	7.233	7.486	6.989	7.094	7.28	7.021	7.373	7.294	7.184	7.138	7.288
MTHFR	MTHFR	4524	1	11845786	11866160	1p36.3	NM_005957.4	NP_005948.3	5.26	5.083	4.908	5.378	5.925	5.526	5.17		5.127	5.361	5.389	5.95	6.16	5.375	5.66	5.801	5.731	5.378	5.442	5.691	7.647	5.832	6.153	5.663	5.268	6.146	6.039	5.602	6.049	5.788	6.525	5.673	5.825	5.882	5.133	5.666	5.188	5.425	5.067	6.261	5.991
CLCN6	CLCN6	1185	1	11866152	11903201	1p36	NM_001286.3	NP_001243888.1	7.051	7.325	7.697	8.284	7.74	8.08	7.21		7.553	8.117	7.66	6.936	7.47	7.493	7.614	7.566	7.183	7.341	7.451	7.385	7.771	7.958	8.006	7.623	7.877	8.166	8.384	8.102	8.431	7.868	9.285	7.845	8.124	8.048	7.057	7.426	8.019	7.525	7.596	7.727	7.806
NPPA-AS1	NPPA-AS1	100379251	1	11900375	11907673	1p36.21			5.116	5.628	5.783	5.997	6.059	5.961	5.584		5.05	5.586	5.445	4.956	5.272	5.942	5.641	5.566	5.256	5.059	5.406	5.516	6.07	5.844	5.757	5.632	5.182	5.77	6.372	6.126	6.368	6.261	8.268	6.21	5.725	5.766	5.302	5.045	6.011	5.475	5.107	5.841	6.002
NPPA	NPPA	4878	1	11905766	11907840	1p36.21	NM_006172.3	NP_006163.1	4.784	4.942	4.891	4.758	5.293	4.985			4.841	4.768	5.04	4.456	4.608	4.987	4.961	4.854	5.087	4.709	5.135	4.633	4.786	4.664	5.191	4.588	4.724	4.908	5.002	5.207	4.508	4.945	6.245	4.87	4.552	4.737	4.791	4.509	4.817	4.855	4.731	4.868	4.982
NPPB	NPPB	4879	1	11917520	11918992	1p36.2	NM_002521.2	NP_002512.1	4.701	4.77	7.183	4.589	4.583	10.282	4.667		4.758	4.633	4.705	4.69	4.61	4.569	4.615	4.541	4.711	4.573	4.754	4.729	4.759	4.578	4.781	4.621	4.708	4.489	4.607	4.827	4.709	4.603	4.523	4.672	4.682	5.012	4.616	4.59	6.602	4.664	9.897	4.877	4.689
KIAA2013	KIAA2013	90231	1	11979644	11986485	1p36.22	NM_138346.2	NP_612355.1	6.851	6.765	6.979	7.691	6.618	7.483	7.474	7.989	7.37	7.462	7.812	8.425	7.332	7.743	7.353	7.499	7.694	7.281	6.892	7.593	7.193	6.895	7.452	7.418	7.026	7.34	6.946	7.26	7.946	6.708	7.164	7.073	7.167	6.889	6.552	6.629	7.785	7.398	6.465	7.733	6.796
RNU5E-4P	RNU5E-4P	100873829	1	11988128	11988247																											5.425
PLOD1	PLOD1	5351	1	11994723	12035599	1p36.22	NM_000302.3	NP_000293.2	7.772	8.231	10.079	9.632	8.406	9.205	9.529	9.164	9.215	10.693	9.937	8.408	8.516	9.456	8.776	7.944	9.171	8.113	5.961	7.188	8.513	6.872	8.632	8.349	8.513	9.676	9.599	9.516	10.433	8.742	9.547	9.925	9.738	9.445	7.965	8.657	9.314	9.536	7.882	9.246	7.768
MFN2	MFN2	9927	1	12040237	12073572	1p36.22	NM_014874.3	NP_055689.1	8.621	8.917	9.074	9.291	8.743	9.543	9.47	7.322	9.484	9.157	9.229	9.124	9.527	9.331	9.246	9.16	9.116	8.826	8.546	9.01	9.697	8.763	9.032	9.087	9.369	9.646	9.282	9.279	9.976	9.093	9.985	9.693	9.468	9.456	8.408	8.95	9.667	9.085	8.712	9.365	8.996
MIIP	MIIP	60672	1	12079298	12092106	1p36.22	NM_021933.3	NP_068752.2	6.529	6.555	7.159	7.71	6.542	7.331	6.78	5.259	6.591	6.964	6.801	6.687	7.571	7.197	7.485	7.053	7.073	6.815	5.789	7.542	8.291	7.27	7.76	7.141	7.209	6.914	7.354	6.482	7.657	6.333	7.761	7.125	7.319	7.325	6.3	6.462	7.553	6.844	6.705	7.39	6.55
TNFRSF8	TNFRSF8	943	1	12123433	12204264	1p36	NM_152942.2	NP_694421.1	6.321	6.315	6.38	6.336	6.25	6.129	6.367		6.395	6.242	6.437	6.193	6.324	6.171	6.195	6.25	6.304	6.278	6.814	6.439	7.997	6.874	7.515	10.968	6.187	6.163	6.156	6.248	6.299	6.457	6.225	6.529	6.144	6.545	6.394	6.213	6.502	6.957	6.384	6.621	6.346
TNFRSF1B	TNFRSF1B	7133	1	12227059	12269277	1p36.22	NM_001066.2	NP_001057.1	4.921	6.022	4.847	5.184	4.881	4.788	5.975		4.857	5.251	4.842	8.564	5.611	4.68	5	5.155	6.758	7.945	5.142	7.676	7.502	4.98	7.401	4.703	4.843	6.229	4.827	5.576	4.773	5.269	4.687	5.094	4.697	4.875	4.866	4.692	6.577	5.341	5.401	5.241	4.802
VPS13D	VPS13D	55187	1	12290095	12572098	1p36.22	NM_018156.2	NP_056193.2	7.575	6.906	7.772	7.769	8.506	8.009	7.76		7.548	8.236	7.372	7.181	7.628	7.843	7.709	7.443	7.292	7.413	7.79	7.601	7.693	7.436	7.186	7.87	7.63	7.797	8.674	8.086	8.059	8.146	8.333	7.893	8.222	7.988	6.943	7.56	7.639	7.4	7.379	8.127	7.504
DHRS3	DHRS3	9249	1	12627938	12677737	1p36.1	NM_004753.4	NP_004744.2	5.624	5.634	6.685	7.778	6.117	5.284	8.703		6.424	7.413	8.09	8.207	6.528	7.761	5.65	8.141	7.236	7.201	5.505	5.478	7.818	5.903	6.662	5.372	7.648	6.437	9.378	7.095	5.783	5.399	5.143	5.417	6.797	7.253	7.797	7.214	6.966	6.415	8.564	7.072	8.952
AADACL3	AADACL3	126767	1	12776117	12788726	1p36.21	NM_001103170.1	NP_001096640.1	5.455	5.613	6.048	6.232	5.195	5.009	5.643		5.472	5.421	5.057	5.121	4.909	4.855	5.417	5.332	5.724	5.285	5.996	5.972	5.621	5.523	5.122	5.088	5.837	4.433	5.512	5.302	5.548	5.236	5.674	5.613	5.335	5.302	5.8	5.525	5.521	5.819	5.735	5.181	5.447
C1orf158	C1orf158	93190	1	12806133	12821102	1p36.21	NM_152290.2	NP_689503.2	5.774	5.804	5.286	5.393	5.266	5.382	5.376		5.613	5.232	5.731	5.736	5.329	5.3	5.355	5.48	5.529	5.479	5.586	5.605	5.927	5.688	5.633	5.208	5.452	5.309	5.187	5.244	5.621	5.441	5.309	5.482	5.314	5.458	5.728	5.44	5.398	5.633	5.464	5.423	5.513
PRAMEF12	PRAMEF12	390999	1	12834990	12838048	1p36.21	NM_001080830.1	NP_001074299.1					4.627	4.513	4.672			4.5	4.587						4.545								4.551	4.488				4.444		4.466	4.738	4.568		4.439
PRAMEF10	PRAMEF10	343071	1	13409127	13635299	1p36.21	NM_001039361.3	NP_001034450.2	5.197	5.209	5.126	5.387	4.997		4.982		5.643	4.903	5.438	5.081	4.847	4.931	5.208	4.835	5.339	4.942	5.766	5.373	5.422	5.474	5.625	4.738	4.561	4.785	4.765	4.773	5.147	5.187	5.053	5.244	5.029	5.112	5.624	5.15	5.487	5.331	5.412	5.522	5.364
PRAMEF20	PRAMEF20	645425	1	13516065	13747803	1p36.21	NM_001099852.1	NP_001093322.1	6.691	6.501	8.232	6.71	7.216	6.451	7.19		6.811	6.978	6.712	6.668	6.767	6.732	6.449	6.487	6.621	6.337	6.813	6.716	6.606	6.425	6.636	6.728	6.621	6.226	6.794	6.524	6.691	6.461	6.479	6.679	6.643	6.759	6.494	6.247	6.765	6.784	6.64	6.406	6.529
LRRC38	LRRC38	126755	1	13801444	13840242	1p36.21	NM_001010847.1	NP_001010847.1							4.524												5.886			6.517	5.148
PDPN	PDPN	10630	1	13910251	13944452	1p36.21	NM_198389.2	NP_001006626.1						4.748	5.731			8.384																											4.504		7.902
PRDM2	PRDM2	7799	1	14026734	14151574	1p36.21	NM_012231.4	NP_001007258.1	6.579	6.091	6.914	7.024	7.024	6.973	6.961	5.544	6.903	7.226	6.65	6.993	7.076	6.385	7.4	6.735	6.304	6.643	7.304	7.106	6.892	7.066	7.581	7.017	6.818	7.367	7.668	7.135	8.156	6.779	7.849	7.243	7.362	7.336	6.086	6.317	6.91	6.313	5.964	7.4	6.778
LOC100132942	LOC100132942	100132942	1	14912035	14912875	1p36.21			4.857	6.365		4.595		6.195			5.377	4.992	4.711						4.453			4.535	4.494		6.137							4.429							5.57			4.787	4.421
KAZN	KAZN	23254	1	14925212	15444544	1p36.21	NM_001017999.2	NP_056024.1	5.958	6.694	6.613	6.625	5.567	7.188	5.385	6.024	6.643	7.043	6.449	5.347	6.202	6.303	6.029	5.414	5.437	5.53	5.166	6.489	6.729	5.035	6.851	4.861	5.208	7.919	7.804	7.043	7.007	6.684	7.913	6.92	5.003	5.202	5.629	5.058	5.798	5.018	6.567	6.552	5.455
LOC100129042	LOC100129042	100129042	1	15198112	15198834	1p36.21			5.245	5.768	5.875	5.383	5.227	5.502	4.863		5.564	5	5.002	5.08	4.662	5.235	4.816	4.981	4.583	4.845	5.304	5.023	5.373	5.173	5.194	4.694		5.788	6.15	5.523	5.532	5.234	6.322	5.775	5.042	5.662	5.44	4.912	5.444	5.528	5.457	5.065	4.958
TMEM51-AS1	TMEM51-AS1	200197	1	15438310	15478960	1p36.21														6.295	5.709	4.628	5.495	5.162	4.982									4.464		5.223	6.001	4.549	5.998	4.622	4.44	4.766		4.572					4.666
TMEM51	TMEM51	55092	1	15479027	15546974	1p36.21	NM_018022.2	NP_001129690.1	5.755	5.399	6.205	5.522	4.823	5.436	6.53	5.481	5.572	6.046	6.152	7.877	7.101	6.486	7.293	6.961	6.912	5.109	4.626	4.661	4.88	4.651	5.272	4.704	6.525	7.179	6.776	6.728	8.519	6.52	7.989	6.804	6.863	6.522	6.572	6.231	6.448	5.988	6.146	5.929	6.212
C1orf195	C1orf195	727684	1	15490691	15498120	1p36.21																	4.571			4.576								4.481	4.46	4.725	4.706		5.122
FHAD1	FHAD1	114827	1	15573767	15724622	1p36.21	NM_052929.1	NP_443161.1			6.367							6.98				4.827			4.449								7.239	5.656		6.754
EFHD2	EFHD2	79180	1	15736390	15756839	1p36.21	NM_024329.5	NP_077305.2	6.547	8.781	7.808	7.791	6.567	7.968	8.599	6.533	8.669	7.979	8.929	9.98	8.206	7.947	8.019	8.816	8.079	8.133	8.116	8.589	7.684	7.328	7.712	8.363	9.571	7.887	8.424	8.186	8.841	7.538	8.575	8.493	8.593	8.746	8.538	6.802	8.902	8.692	8.128	7.528	7.4
CTRC	CTRC	11330	1	15764937	15773153	1p36.21	NM_007272.2	NP_009203.2	6.524	6.556	6.493	6.499	6.581	6.162	6.711		6.528	6.269	6.878	6.548	6.599	6.438	6.382	6.398	6.754	6.469	6.784	6.742	6.926	6.619	6.642	5.866	6.148	5.84	5.966	6.266	6.349	6.159	6.449	6.452	6.439	6.572	6.794	6.297	6.51	6.561	6.707	6.409	6.503
CELA2A	CELA2A	63036	1	15783222	15798586	1p36.21	NM_033440.2	NP_254275.1	4.745	5.234	4.951	4.787	4.814	4.507	4.607		4.941	4.84	4.985	4.999	4.431	4.696	4.664		4.692	4.636	4.985	4.9	4.902	5.044	5.333	4.457	4.663	4.668	5.059	4.905	4.732	4.66	4.932	5.102			4.664	4.709	4.854	4.759	4.724	4.649	4.574
CASP9	CASP9	842	1	15817895	15851285	1p36.21	NM_001229.4	NP_001220.2	5.233	5.762	5.942	5.429	6.164	6.466	6.701	5.375	6.471	6.377	6.797	7.036	6.497	6.444	6.477	6.268	6.635	6.83	5.473	5.883	7.612	5.733	6.645	7.254	6.076	6.996	6.423	7.145	6.729	6.593	8.019	5.962	6.354	6.198	6.205	6.714	6.879	5.999	5.47	6.667	6.401
DNAJC16	DNAJC16	23341	1	15853307	15898228	1p36.1	NM_015291.2	NP_056106.1	6.796	7.084	7.186	7.472	7.061	7.442	7.713	4.538	7.061	7.686	7.189	7.402	7.706	7.931	7.819	7.489	7.359	7.097	6.752	7.153	7.55	7.125	7.551	7.136	7.24	7.643	7.458	7.627	8.328	7.289	7.88	7.67	7.249	7.177	6.647	7.217	7.654	7.25	6.88	7.98	7.188
AGMAT	AGMAT	79814	1	15898193	15911605	1p36.21	NM_024758.4	NP_079034.3	5.994	5.454	4.903	5.122	4.678		4.496			4.873	4.521	8.638	8.746		6.304	7.419	7.451	7.551	4.532	5.02			7.562							4.576	4.528			4.646	6.267	4.513	6.055			5.467	4.665
CHCHD2P6	CHCHD2P6	645317	1	15930403	15931537	1p36.21			7.588	7.754	7.95	8.021	8.28	8.111	8.265		7.948	7.812	7.857	8.289	8.136	8.261	8.008	8.063	8.295	8.396	8.134	8.094	8.183	7.968	8.675	8.333	8.321	7.985	8.135	8.367	8.202	8.34	8.033	8.257	8.245	8.012	7.688	7.845	7.991	8.033	7.49	8.183	7.868
PLEKHM2	PLEKHM2	23207	1	16010826	16061264	1p36.21	NM_015164.2	NP_055979.2	7.826	8.171	8.809	8.609	7.72	8.92	8.8	5.478	8.502	8.923	8.327	7.634	8.344	8.272	8.122	8.068	8.013	7.872	8.142	8.021	8.419	8.303	8.214	8.685	8.402	8.413	9.339	8.735	9.332	8.643	9.333	8.884	9.451	9.199	7.601	8.151	8.761	8.321	8.477	8.399	7.97
SLC25A34	SLC25A34	284723	1	16062808	16067887	1p36.21	NM_207348.1	NP_997231.1	5.975	5.966	6.274	6.217	6.307	5.846	6.359		6.008	6.363	6.437	5.85	5.573	5.876	6.02	5.832	5.718	5.91	6.323	6.283	6.301	6.107	6.098	5.32	5.774	5.656	6.153	6.383	5.766	6.103	5.43	6.018	6.491	6.602	6.173	5.997	6.05	6.323	6.578	5.834	6.058
FBLIM1	FBLIM1	54751	1	16085254	16113084	1p36.21	NM_001024215.1	NP_060026.2	5.51	5.981	9.918	7.541	5.993	6.711	5.344	6.734	6.96	7.671	7.485	8.038	8.023	5.639	5.567	5.964	7.132	6.762	5.401	5.321	5.388	5.51	5.407	5.24	5.346	6.908	5.257	5.508	5.284	5.783	5.384	5.259	6.552	6.564	6.297	7.022	8.163	6.359	8.195	6.027	6.563
FLJ37453	FLJ37453	729614	1	16160709	16174642	1p36.21			5.823		4.894		5.395	5.522	5.002		5.1	5.197	5.078	4.674	5.023		4.962	5.202	5.401	5.917	6.365	4.804	6.194	5.447	5.393	4.704		4.54	5.324	6.006	4.939	4.572	5.651	4.649	5.381	5.607	4.85	5.176	5.888	4.991		6.828	5.292
SPEN	SPEN	23013	1	16174358	16266950	1p36	NM_015001.2	NP_055816.2	7.894	7.276	7.972	8.031	7.078	8.258	7.9	7.302	7.706	8.139	7.485	7.741	8.215	8.364	8.282	8.294	7.981	8.089	8.49	8.439	8.324	8.484	8.579	8.677	8.119	7.667	8.361	7.854	8.296	7.716	8.525	7.786	8.301	8.091	7.44	7.312	7.768	7.384	7.465	8.244	8.033
ZBTB17	ZBTB17	7709	1	16268363	16302627	1p36.13	NM_003443.2	NP_001229813.1	6.783	6.795	7.16	7.189	7.001	7.509	7.579	5.202	7.113	7.386	7.181	7.201	7.021	7.131	7.07	6.815	6.892	7.104	7.153	7.11	7.516	7.406	6.997	7.883	7.419	6.812	7.354	7.364	7.584	7.245	7.624	7.584	7.525	7.383	6.569	6.789	7.298	6.769	6.957	7.185	6.838
C1orf64	C1orf64	149563	1	16330730	16333190	1p36.13	NM_178840.2	NP_849162.1					5.653
HSPB7	HSPB7	27129	1	16340522	16345285	1p36.23-p34.3	NM_014424.4	NP_055239.1			5.98					9.668		6.826
CLCNKA	CLCNKA	1187	1	16348485	16360545	1p36	NM_004070.3	NP_004061.3	6.01	5.453	5.777	5.685	6.047	5.657	5.608		5.916	5.569	5.974	5.224	5.449	5.563	5.651	5.402	5.549	5.485	5.906	5.41	5.798	5.156	5.699	5.659	5.78	5.274	5.529	5.615	5.811	5.385	5.727	5.655	5.331	5.508	5.663	6.229	5.827	5.818	5.662	5.848	5.636
CLCNKB	CLCNKB	1188	1	16370230	16383821	1p36	NM_001165945.2	NP_001159417.2	5.149	4.678	4.705	4.482	4.914	4.616	4.687		4.914	4.573	4.76	4.803	4.998	5.256	4.575	4.691	4.775	4.639	4.787	4.948	5.422	4.698	4.471		4.491		4.755	4.582	4.511	5.227	4.702	4.482			4.733	5.829	4.939	4.616	4.551	5.429	4.735
FAM131C	FAM131C	348487	1	16384263	16400127	1p36.13	NM_182623.2	NP_872429.2	6.698	5.992	6.257	5.937	5.694	5.988	6.243		6.132	5.914	6.159	6.054	6.424	7.309	6.488	5.968	6.672	6.298	5.665	5.838	5.864	5.926	6.434	5.462	6.198	5.515	5.628	5.765	5.609	6.63	5.826	6.19	5.721	5.809	7.206	6.782	6.308	6.203	6.027	6.521	6.099
EPHA2	EPHA2	1969	1	16450831	16482582	1p36	NM_004431.3	NP_004422.2	6.306	9.249	8.661	9.556	6.445	9.596	9.634	7.947	9.398	7.912	9.179	7.718	9.159	8.959	8.291	9.568	9.459	8.965	6.051	6.201	6.151	6.164	6.1	5.831	8.828	7.489	5.998	8.04	6.345	7.025	8.41	7.29	6.661	7.106	8.608	8.686	10.003	8.688	8.843	8.541	9.194
ARHGEF19	ARHGEF19	128272	1	16524598	16539104	1p36.13	NM_153213.3	NP_694945.2	6.813	5.697	6.218	5.945	7.145	5.784	5.491		5.676	5.641	5.421	6.919	6.82	7.57	5.861	7.297	6.292	5.893	5.944	5.673	6.076	5.974	6.015	5.762	5.869	5.766	6.272	6.2	6.042	6.122	5.965	5.833	6.25	6.086	5.79	5.916	6.648	6.417	5.771	6.947	5.811
RSG1	RSG1	79363	1	16558181	16563659	1p36.13	NM_030907.3	NP_112169.2	4.826		5.41	4.819	5.518	4.587	4.819		4.595	4.947	4.969	5.29	5.297	4.784	4.472	5.044	5.131	4.962	4.518	4.523	5.64	4.467	5.54		4.816	4.549	4.719		4.885	4.636	5.179	4.853	5.084	6.073	4.821	4.805	4.731	4.72	4.851	5.212	4.903
FBXO42	FBXO42	54455	1	16573334	16678986	1p36.23-p36.11	NM_018994.1	NP_061867.1	7.228	7.053	7.553	7.602	7.504	8.037	7.704	4.471	7.828	8.015	7.442	7.556	7.743	7.79	7.696	7.597	7.825	7.293	7.696	7.526	7.575	7.772	7.374	8.136	7.086	7.423	7.647	7.619	8.211	7.332	8.053	7.52	7.651	7.387	6.817	7.327	7.58	7.088	6.901	8.321	7.172
SZRD1	SZRD1	26099	1	16693524	16724643	1p36.13	NM_001114600.2	NP_001108072.1	8.98	9.112	9.2	9.379	8.735	9.987	9.59	7.678	9.575	9.622	9.749	9.593	9.27	9.474	9.259	9.476	9.129	9.172	8.763	9.022	8.995	8.935	9.345	9.705	9.732	9.173	9.789	9.444	9.62	9.078	9.765	9.341	9.866	9.535	8.617	8.811	9.571	9.068	8.778	9.698	8.885
SPATA21	SPATA21	374955	1	16725137	16763919	1p36.13	NM_198546.1	NP_940948.1	6.278	6.268	6.602	6.377	6.252	5.919	6.136		6.294	6.325	6.564	5.586	6.134	5.945	6.244	6.162	6.248	6.117	6.544	6.332	6.495	6.504	6.408	5.807	5.975	5.973	6.13	6.034	6.321	6.081	6.133	6.235	5.879	6.277	6.451	6.121	6.509	6.756	6.338	6.297	6.366
NECAP2	NECAP2	55707	1	16767166	16786584	1p36.13	NM_001145277.1	NP_060560.1	8.029	8.725	8.903	8.691	8.146	9.112	9.121	7.541	8.752	8.955	8.639	8.859	8.783	8.779	8.567	8.976	8.787	8.704	8.791	8.799	9.253	8.831	9.28	8.99	8.763	7.918	9.177	8.866	8.823	7.94	8.634	8.394	9.24	8.992	8.079	8.045	9.288	8.561	8.54	9.263	8.454
CROCCP3	CROCCP3	114819	1	16793930	16819196	1p36.13			5.142	5.228	5.466	5.171	4.673	5.859	4.96		5.832	6.237	5.08		5.073	5.696	6.338	4.469	4.707	5.183	5.536			5.014	4.626		4.686	5.169	6.28	5.299	5.585	5.235	6.086	4.754	5.671	5.232	5.164	5.406	5.556	5.747	4.769	5.941	4.554
NBPF1	NBPF1	55672	1	16888921	16940100	1p36.13	NM_017940.4	NP_060410.2	9.313	9.022	8.674	8.595	9.217	9.444	8.026	9.556	8.573	9.228	8.285	6.601	7.973	8.944	8.669	8.201	7.613	8.465	8.188	6.843	7.315	8.453	8.64	9.311	8.023	8.592	8.759	8.68	8.633	8.284	8.994	8.36	8.582	8.224	8.108	8.662	8.629	9.023	8.681	9.14	7.817
CROCCP2	CROCCP2	84809	1	16944750	16957401	1p36.13			5.702	5.498	5.807	5.555	5.962	6.321	5.203	5.365	5.38	6.174	5.318	5.306	5.861	6.075	6.538	5.781	5.906	6.305	6.506	6.479	6.659	6.455	6.297	5.523	5.24	5.338	6.476	6.162	6.869	5.867	6.595	5.443	6.275	5.936	5.376	5.204	5.52	5.741	4.941	6.511	5.36
ESPNP	ESPNP	284729	1	17017712	17046652	1p36.13			6.588	6.035	6.349	5.883	8.171	5.85	6.117		5.901	6.003	6.103	6.587	6.368	7.331	5.797	5.926	5.884	5.466	5.75	6.24	6.029	5.629	6.294	6.242	6.333	5.833	5.938	6.275	5.481	6.079	5.781	5.947	5.754	5.992	5.999	6.005	5.857	5.701	6.04	6.153	6.061
CROCCP4	CROCCP4	100421113	1	17076721	17077458				7.258	7.471	7.526	7.413	6.974	7.021	6.852		7.674	7.061	7.493	6.825	7.289	7.332	7.343	7.352	7.237	7.64	7.474	7.122	7.423	7.57	7.401	7.023	6.787	7.011	7.442	7.254	7.24	7.277	7.293	7.484	7.374	7.333	7.5	7.284	7.136	7.763	7.418	7.19	7.632
CROCC	CROCC	9696	1	17248444	17299474	1p36.13	NM_014675.3	NP_055490.3	4.871	4.576	4.677	4.607	4.929	4.575	4.842		4.625	4.801	4.773		4.719	5.263	5.368	4.582	4.561	4.933	5.015		4.429	4.906	5.07	4.559		5.167	5.601	5.008	5.528	5.175	5.869	4.444	4.671	5.493	4.551	4.484	4.944	4.612		5.106
MFAP2	MFAP2	4237	1	17300998	17308081	1p36.1-p35	NM_001135248.1	NP_001128719.1	6.582	6.318	9.568	9.038	5.927	6.472	5.071		4.796	7.297	5.736	4.82	5.772	8.894	4.808	5.188	5.438	7.97	4.675	4.892	4.851	4.777	5.181	4.638	8.934	8.961	5.928	6.475	5.062	5.371	5.283	5.234	4.801	4.836	4.859	6.881	5.808	5.074	7.213	7.721	4.804
ATP13A2	ATP13A2	23400	1	17312452	17338467	1p36	NM_001141973.1	NP_001135446.1	7.452	8.09	7.615	7.411	8.215	8.143	7.874	6.15	7.814	7.937	8.257	8.322	8.903	8.312	8.285	8.578	8.805	8.033	7.825	7.59	7.816	7.637	8.076	7.953	8.353	8.87	8.831	8.091	8.916	7.754	8.96	8.759	8.422	8.201	7.384	7.962	8.197	7.141	7.735	7.739	7.866
SDHB	SDHB	6390	1	17345224	17380665	1p36.1-p35	NM_003000.2	NP_002991.2	8.398	8.08	8.614	8.724	8.582	9.264	9.107	9.58	9.416	8.684	9.48	9.537	9.553	9.251	9.207	8.912	9.566	8.939	8.999	9.608	9.718	8.866	9.508	9.234	9.294	9.052	9.988	9.658	10.342	9.884	10.255	9.958	9.95	9.822	8.712	8.377	9.226	8.26	8.577	9.17	8.823
PADI2	PADI2	11240	1	17393255	17445948	1p36.13	NM_007365.2	NP_031391.2	5.878	5.12	5.226	5.36	6.08	5.262	5.165		5.251	5.206	9.265	5.272	5.248	5.36	5.072	6.222	5.241	5.17	5.29	5.707	5.272	5.287	5.223	5.106	5.164	5.033	5.029	5.126	5.145	5.374	5.064	5.121	5.031	5.495	5.648	5.547	5.197	5.166	5.138	5.584	6.693
LOC400743	LOC400743	400743	1	17520820	17521392	1p36.13			4.847	5.905	5.036	5.256	4.891	6.68	4.932		5.668	5.29	6.214	4.829	5.217	4.905	4.925	5.2	5.142	5.002	5.383	5.219	5.133	5.072	5.19	4.648	5.106	4.865	4.856	5.362	4.976	5.38	5.084	5.27	4.69	4.676	5.144	4.915	5.323	4.959	5.917	5.044	5.173
PADI1	PADI1	29943	1	17531620	17572501	1p36.13	NM_013358.2	NP_037490.2	5.225	5.6	5.251	5.39	5.263	5.877	5.255		5.405	5.082	5.836	8.588	5.201	4.946	5.107	8.015	5.545	5.257	5.32	5.405	5.415	5.233	5.266	4.989	5.127	5.122	5.049	5.305	5.281	5.141	5.372	5.255	5.04	5.501	5.417	5.321	5.813	5.41	5.469	5.319	6.007
PADI3	PADI3	51702	1	17575592	17610727	1p36.13	NM_016233.2	NP_057317.2	5.853	5.319	5.225	5.429	8.067	5.097	6.149		5.409	5.165	9.876	5.398	5.25	5.386	5.132	5.302	5.278	5.156	5.285	5.396	5.312	5.264	5.327	5.169	5.3	5.124	5.091	6.027	5.238	5.184	5.322	5.525	5.085	5.38	5.87	5.347	5.275	5.316	5.369	5.792	5.735
PADI4	PADI4	23569	1	17634689	17690495	1p36.13	NM_012387.2	NP_036519.2	4.552	4.465		4.468	4.753	4.566	4.723		4.452	4.572	5.082	4.698	4.592	4.435		4.48	4.617	4.529	4.57	5.249	4.668	4.612	5.72		4.464			4.491	4.591	4.51	4.457	4.438		5.977	4.596	4.583	4.546	4.558	4.669	4.43	4.659
PADI6	PADI6	353238	1	17698690	17728195	1p36.13	NM_207421.3	NP_997304.3	5.407	5.981	5.765	5.5	5.439	5.661	5.576		5.813	5.61	6.012	5.119	5.53	5.342	5.545	5.703	5.8	5.683	5.947	5.866	5.462	5.932	5.707	5.268	5.498	5.302	5.467	5.538	5.932	5.083	5.569	5.695	5.207	5.533	5.94	5.778	5.678	5.761	5.832	5.376	5.862
RCC2	RCC2	55920	1	17733250	17766250	1p36.13	NM_001136204.2	NP_061185.1	9.543	8.36	8.808	9.139	8.996	9.057	9.086	8.174	9.549	9.492	9.933	10.21	9.575	9.561	9.573	9.932	9.67	9.976	9.943	9.994	9.992	10.114	9.678	9.837	9.17	9.266	9.914	9.349	9.578	8.643	9.963	9.848	9.894	9.49	8.74	8.381	9.526	8.114	8.6	9.069	9.323
ARHGEF10L	ARHGEF10L	55160	1	17866329	18024370	1p36.13	NM_018125.3	NP_001011722.2	7.352	6.07	6.701	5.855	6.847	6.469	6.5		6.678	7.007	6.704	8.222	7.687	6.606	6.845	7.462	7.084	7.378	5.946	5.946	5.939	5.897	6.074	6.042	5.831	6.241	6.292	6.213	5.976	6.298	6.608	6.436	6.535	6.73	6.438	6.54	6.354	6.433	6.311	6.126	7.146
ACTL8	ACTL8	81569	1	18081807	18153558	1p36.2-p35	NM_030812.2	NP_110439.2													5.587							4.865			7.697	5.127				6.861					4.638	4.751						4.537
IGSF21	IGSF21	84966	1	18434239	18704977	1p36.13	NM_032880.4	NP_116269.3	6.12	6.32	6.325	6.103	6.133	5.952	6.206		6.519	6.142	6.526	6.021	6.106	5.975	5.995	6.11	6.477	6.089	6.614	6.56	6.431	6.396	6.716	5.901	6.068	5.914	6.172	6.281	6.113	5.896	6.183	6.499	5.944	6.579	6.531	6.218	6.387	6.469	6.252	6.297	6.386
KLHDC7A	KLHDC7A	127707	1	18807423	18812480	1p36.13	NM_152375.2	NP_689588.2	5.49	5.359	5.251	5.302	6.929	5.12	5.464		5.693	5.344	5.461	5.51	5.364	5.256	5.568	7.467	5.387	5.51	5.375	5.525	5.607	5.485	5.534	5.181	5.177	5.112	5.287	5.153	5.246	5.244	5.333	5.369	5.269	5.469	6.3	6.127	5.43	5.246	5.734	5.17	5.582
PAX7	PAX7	5081	1	18957499	19075360	1p36.13	NM_002584.2	NP_002575.1	5.019	4.896	4.863	4.955	4.61	4.731	4.861		6.369	6.794	5.298	4.783	4.766	4.507	4.795	4.812	4.976	4.875	4.963	4.791	5.094	4.868	5.057		4.771	4.61	4.636	4.629	4.989	4.54	4.875	4.79	4.877	4.902	5.197	4.845	5.024	4.908	5.026	4.83	4.818
TAS1R2	TAS1R2	80834	1	19166092	19186155	1p36.13	NM_152232.2	NP_689418.2	6.344	6.711	6.271	6.16	5.925	5.98	6.092		6.465	6.267	6.075	5.998	6.495	6.348	6.272	6.378	6.375	6.453	6.496	6.636	6.175	6.173	6.083	6.08	5.943	5.29	5.823	5.429	6.023	5.859	5.9	6.317	5.936	5.86	5.98	6.136	6.238	6.356	5.947	6.253	5.932
ALDH4A1	ALDH4A1	8659	1	19197923	19229293	1p36	NM_001161504.1	NP_001154976.1	7.556	6.275	6.513	6.709	7.842	6.793	6.481		6.201	6.639	6.465	8.588	6.956	6.657	6.99	7.453	7.049	6.659	6.467	6.909	6.946	6.357	6.384	6.327	6.16	8.301	7.113	6.585	6.747	6.389	7.331	6.723	6.657	6.816	6.508	6.801	6.497	6.123	6.245	6.611	6.474
IFFO2	IFFO2	126917	1	19230773	19282826	1p36.13	NM_001136265.1	NP_001129737.1	5.746	7.015	7.02	6.547	5.742	6.708	6.775	7.178	7.909	7.609	8.561	8.202	5.667	6.596	6.339	7.753	6.878	6.311	6.139	5.344	5.025	5.435	6.667	7.631	6.768	7.235	7.305	7.077	6.452	5.809	7.129	6.771	6.48	6.262	7.362	7.345	6.692	6.8	5.895	5.566	6.453
UBR4	UBR4	23352	1	19400999	19536746	1p36.13	NM_020765.2	NP_065816.2	8.919	9.393	9.486	9.059	8.853	9.956	9.657		9.466	9.63	9.533	8.776	9.515	9.578	9.617	9.735	9.458	9.163	9.4	9.245	10.046	9.077	9.421	9.588	9.009	9.017	9.817	9.953	10.114	9.594	10.259	9.817	9.522	9.289	9.211	9.296	9.801	9.197	9.426	9.8	9.244
EMC1	EMC1	23065	1	19542157	19578053	1p36.13	NM_001271427.1	NP_001258356.1	8.028	8.254	9.358	8.911	8.472	9.313	9.178	7.154	9.103	9.58	9.19	8.707	8.991	9.107	8.867	8.701	8.756	8.073	8.012	8.83	8.8	8.08	8.954	8.977	8.66	8.751	9.195	9.132	9.85	7.959	9.339	9.657	9.022	9.003	7.926	8.407	9.479	9.034	8.21	9.332	8.69
MRTO4	MRTO4	51154	1	19578074	19586622	1p36.13	NM_016183.3	NP_057267.2	7.858	8.018	8.086	8.334	7.898	9.08	8.679	7.903	8.44	7.63	8.527	8.614	8.728	8.618	8.694	8.744	8.117	8.46	8.21	8.79	9.141	8.39	8.743	8.823	8.772	8.135	8.471	8.746	9.018	8.025	8.998	8.895	8.886	8.586	7.965	7.647	9.136	7.768	7.376	8.349	8.231
AKR7L	AKR7L	246181	1	19592475	19600568	1p36.13|1p35-p36.1			5.949	6.34	6.285	6.095	6.528	6.301	6.072		5.964	6.718	6.466	7.17	6.554	6.172	6.398	7.038	6.536	7.141	6.039	5.785	5.95	5.609	6.497	7.019	6.521	7.012	6.528	6.127	6.2	6.355	6.656	6.943	6.104	6.606	5.531	5.728	6.023	5.774	6.007	6.429	5.83
LOC100130193	LOC100130193	100130193	1	19600474	19600872	1p36.13					4.471			5.017			4.58	5.137					4.82	4.526		4.45	4.545					5.313			4.539	5.105	4.819		4.785		4.811
AKR7A3	AKR7A3	22977	1	19609056	19615280	1p36.13	NM_012067.2	NP_036199.2	5.272	5.276	5.316	4.993	5.882	5.185	5.148	5.198	5.288	5.615	5.433	7.567	6.746	5.617	5.323	6.979	6.255	5.525	5.41	5.545	5.096	4.933	5.332	5.41	5.077	5.94	5.49	5.45	6.237	5.36	5.932	5.53	5.146	4.76	5.146	4.974	5.334	5.296	4.939	5.515	5.302
LOC100506730	LOC100506730	100506730	1	19619740	19622230	1p36			4.955	4.668	5.298	4.966	4.903	4.732	5.23	4.575	5.282	5.768	6.184	5.94	5.547	5.489	4.895	4.99	4.862	5.681	5.838	4.832	5.729	4.822	4.717	4.907		4.923	4.906				4.831			6.861			4.709			4.688	4.49
AKR7A2	AKR7A2	8574	1	19629201	19638640	1p36.13	NM_003689.3	NP_003680.2	8.08	8.071	8.52	7.459	8.908	8.412	8.426	8.483	8.096	8.946	8.347	8.874	8.797	8.892	8.37	8.719	8.547	8.778	8.358	8.287	8.058	7.727	8.402	8.457	7.883	9.528	8.861	9.03	9.721	8.288	9.38	9.018	8.497	8.527	7.831	8.078	8.607	8.177	7.517	8.5	8.336
PQLC2	PQLC2	54896	1	19638739	19658922	1p36.13	NM_001040125.1	NP_001035215.1	6.237	6.865	6.667	6.903	6.884	7.35	7.039	5.527	6.81	6.967	7.391	6.52	7.094	6.586	6.761	6.67	6.553	6.397	5.934	6.27	7.36	5.674	6.114	6.844	6.753	7.48	7.648	7.236	7.766	7.067	8.295	7.474	7.429	7.747	6.26	6.638	7.148	7.071	6.752	7.178	6.77
CAPZB	CAPZB	832	1	19665266	19812135	1p36.1	NM_004930.3	NP_004921.1	9.34	9.67	10.668	10.129	9.84	10.288	10.512	10.334	10.246	10.806	10.108	10.37	10.051	9.815	9.822	9.958	10.037	9.714	10.069	10.054	9.658	9.716	9.665	9.914	9.76	9.604	10.252	10.054	10.756	9.438	10.303	10.264	10.32	10.061	9.58	9.642	10.526	9.67	9.42	10.241	9.721
LOC644083	LOC644083	644083	1	19725372	19727707	1p36.13																										5.621
MINOS1	MINOS1	440574	1	19923470	19956315	1p36.13	NM_001204083.1	NP_001027535.1	9.875	10.471	9.742	10.9	10.135	11.244	10.853	11.17	10.926	11.247	11.205	11.302	10.723	9.897	9.924	10.6	10.744	10.527	10.496	10.492	11.389	10.408	11.374	10.397	9.765	9.931	11.395	9.957	11.394	10.399	11.481	11.405	11.302	10.641	10.203	10.78	10.791	10.724	9.762	11.138	10.385
RPS14P3	RPS14P3	644068	1	19934300	19935138	1p36.13			8.248	7.937	7.643	8.036	8.175	7.929	8.025		7.876	7.86	7.748	8.097	8.234	8.065	7.985	8.165	8.523	7.992	7.807	8.941	8.126	7.927	8.398	8.349	8.44	7.151	8.184	8.518	8.132	8.355	8.028	8.23	8.299	8.163	7.825	7.642	8.285	8.137	8.2	8.321	7.79
NBL1	NBL1	4681	1	19969722	19984949	1p36.13	NM_182744.3	NP_877421.2		6.377	7.581	6.55	7.452	6.211	6.317	9.329		9.344	4.445	8.387	8.881	7.232	8.118	7.645	8.632	6.622						8.222		8.541	10.053	7.182	11.068	9.912	11.178	10.371	8.186	8.104	6.078	6.564	7.791	8.124	5.734	5.164	6.653
HTR6	HTR6	3362	1	19991779	20007459	1p36-p35	NM_000871.1	NP_000862.1	5.98	5.599	5.944	5.644	5.873	5.592	6.13		5.928	5.637	6.116	5.956	5.815	5.87	5.589	5.44	6.088	5.91	5.797	5.932	5.673	5.826	5.931	7.009	5.904	5.368	5.802	5.464	6.008	5.943	5.616	6.084	5.726	5.809	5.795	5.84	5.797	5.255	5.87	5.945	5.623
TMCO4	TMCO4	255104	1	20008705	20126410	1p36.13	NM_181719.4	NP_859070.3	6.609	6.488	6.357	5.257	6.762	7.117	6.985		5.99	6.176	5.977	7.204	6.623	6.504	6.761	6.834	6.426	6.099	5.509	5.85	5.347	5.148	6.694	7.059	6.158	6.465	7.119	6.368	6.551	6.622	7.245	6.174	7.498	7.562	5.699	6.466	6.2	6.295	5.581	6.48	6.532
OTUD3	OTUD3	23252	1	20208887	20239437	1p36.13	NM_015207.1	NP_056022.1	5.976	5.908	6.349	6.056	6.355	7.602	6.092		6.472	6.43	6.944	7.034	5.913	7.025	6.819	6.42	6.729	6.892	6.334	6.422	6.384	6.477	5.689	6.472	6.118	6.285	6.652	6.808	7.627	5.964	7.523	7.178	6.401	6.686	5.653	6.364	6.896	5.57	5.705	7.081	6.352
PLA2G2A	PLA2G2A	5320	1	20301923	20306932	1p35	NM_001161728.1	NP_001155201.1	4.673	4.537	4.7	4.48	4.497		4.434		4.927		4.658	12.434	4.564		4.608	4.642	4.986	4.609	4.648	4.627	4.614	4.618	4.565	4.43				4.57	4.462	4.539		4.584	4.624	4.748	4.658	4.848	4.424	4.562	4.543	4.616	4.532
PLA2G5	PLA2G5	5322	1	20396700	20418394	1p36-p34	NM_000929.2	NP_000920.1	4.663	4.921	4.735	4.816	4.586		4.669		4.911	4.614	4.75		4.753		4.492	4.573		4.594	4.919	4.895	4.935	4.858	4.687	4.612	4.801	4.43	4.593	4.495	4.775	4.502	4.759	4.595	4.421	4.548	4.85	4.515	4.856	4.799	4.834	4.715	4.702
PLA2G2D	PLA2G2D	26279	1	20439142	20446059	1p36.12	NM_012400.3	NP_036532.1	7.445	7.515	7.658	7.485	7.457	7.106	7.568		7.589	7.453	7.681	7.276	7.381	7.083	7.207	7.346	7.536	7.156	7.466	7.568	7.91	7.461	7.607	7.081	7.293	6.874	7.109	7.285	7.329	7.281	7.143	7.42	7.004	7.475	7.643	7.521	7.476	7.596	7.606	7.45	7.766
PLA2G2F	PLA2G2F	64600	1	20465822	20476879	1p35	NM_022819.3	NP_073730.3	5.67	5.62	5.525	5.525	5.478	5.324	5.96		5.746	5.451	5.676	8.996	5.594	5.576	5.702	5.984	6.182	5.578	5.844	5.823	5.689	5.802	5.582	5.34	5.474	5.478	5.218	5.245	5.717	5.632	5.691	5.722	5.614	5.69	5.847	5.55	5.721	5.825	5.75	5.607	5.95
PLA2G2C	PLA2G2C	391013	1	20489584	20503857	1p36.12	NM_001105572.1	NP_001099042.1																				5.351
UBXN10	UBXN10	127733	1	20512570	20522541	1p36.12	NM_152376.3	NP_689589.1												8.167									5.316					4.683
VWA5B1	VWA5B1	127731	1	20617411	20681387	1p36.12	NM_001039500.2	NP_001034589.2	4.927	5.311	5.339	5.272	4.861	4.714	4.851		5.17	5.06	5.39	5.33	4.873	4.691	5.039	4.951	5.238	4.977	5.211	5.35	5.238	5.232	4.876	4.979	4.825	4.611	4.795	4.919	5.199	4.883	4.951	5.24	5.088	4.998	5.158	5.218	5.314	5.161	5.291	4.908	5.32
CAMK2N1	CAMK2N1	55450	1	20808883	20812728	1p36.12	NM_018584.5	NP_061054.2	7.345	6.057	7.983	5.282	8.39	7.655	8.785		6.413	8.701	5.196	8.707	7.574	7.329	6.982	8.721	8.47	7.038			4.693			5.393	7.51	6.814	7.738	5.963	7.155	6.22	7.02	7.12	7.655	7.441	8.171	8.41	7.157	8.833	5.578	5.421	7.697
MUL1	MUL1	79594	1	20825940	20834674	1p36.12	NM_024544.2	NP_078820.2	6.028	6.665	6.717	6.819	6.549	7.01	7.604		6.793	7.023	6.893	7.099	6.872	6.905	6.321	6.494	6.724	6.218	6.071	6.517	6.899	6.113	6.776	6.928	7.022	6.989	6.88	6.993	7.601	6.97	7.153	7.287	7.697	7.262	6.46	6.873	6.959	6.419	6.402	6.344	6.774
RPS4XP4	RPS4XP4	441878	1	20852444	20853302	1p36.12			9.091	9.414	9.03	9.102	9.171	9.248	9.449		9.315	9.186	9.364	9.46	9.533	9.378	9.117	9.38	9.504	9.608	9.42	9.672	9.172	9.371	9.753	9.415	9.697	9.286	9.42	9.921	9.274	9.613	8.763	9.643	9.531	9.315	9.26	9.034	9.339	9.332	9.107	9.325	8.701
FAM43B	FAM43B	163933	1	20878931	20881513	1p36.12	NM_207334.2	NP_997217.1	5.265	5.194	5.323	5.319	5.093	5.096	5.431		5.346	5.365	5.407	5.588	5.033	4.826	5.123	5.04	5.349	5.509	5.328	5.33	5.605	5.047	5.279	4.805	5.152	5.178	5.049	4.652	5.341	5.44	5.218	5.167	5.147	5.622	5.943	5.334	4.975	6.363	5.081	6.666	5.283
CDA	CDA	978	1	20915443	20945400	1p36.2-p35	NM_001785.2	NP_001776.1	4.485	7.692	4.581			5.212	4.7					8.1	5.393	6.441	4.774	5.576	4.825	5.201	4.458	5.084		4.439	4.766		7.396			4.771		5.155				4.773	5.91	4.792	7.52	8.931	4.823	4.77	4.814
PINK1	PINK1	65018	1	20959947	20978004	1p36	NM_032409.2	NP_115785.1	6.27	7.657	7.665	5.794	6.478	7.755	7.72	5.756	6.997	7.2	6.474	7.02	6.369	6.931	7.073	6.251	6.688	6.36	6.213	6.306	6.118	6.098	6.468	6.404	7.423	6.823	7.323	6.802	7.293	6.756	7.052	7.168	7.405	7.432	6.322	6.569	7.63	7.79	7.141	6.817	6.461
PINK1-AS	PINK1-AS	100861548	1	20969149	20978686	1p36.12			5.797	5.727	6.374	5.63	5.451	6.939	6.961		5.735	6.1	5.979	6.464	7.099	7.052	7.53	5.872	6.774	6.238	6.519	6.465	5.848	6.31	6.215	6.258	6.212	6.295	6.491	5.653	6.131	5.537	5.727	6.13	6.577	6.447	5.762	5.214	5.756	5.46	5.961	6.024	5.915
DDOST	DDOST	1650	1	20978259	20988037	1p36.1	NM_005216.4	NP_005207.2	9.687	9.505	10.285	9.974	10.015	10.399	10.561	10.624	10.215	10.58	10.477	10.822	10.42	10.693	10.271	10.246	10.605	9.98	9.644	10.812	9.934	9.584	10.825	10.177	10.407	10.418	10.353	10.69	11.004	9.841	10.672	10.515	10.678	10.287	9.494	9.789	10.536	10.168	9.745	10.406	10.089
KIF17	KIF17	57576	1	20990506	21044510	1p36.12	NM_001122819.1	NP_001116291.1	6.036	6.285	6.079	6.014	5.916	7.177	6.004		6.184	5.909	6.13	5.851	5.819	5.842	5.805	5.952	6.071	5.836	6.04	6.687	5.912	5.935	6.014	5.786	6.038	5.825	5.885	6	5.874	6.121	8.118	6.081	5.887	6.206	6.131	5.822	6.153	6.063	6.299	6.086	5.926
SH2D5	SH2D5	400745	1	21046224	21059133	1p36.12	NM_001103161.1	NP_001096630.1	4.93	6.131	5.402	5.844	4.828	6.179	5.212		5.172	5.056	5.09	4.957	5.146	5.339	4.906	4.986	4.893	4.781	5.033	5.05	5.057	5.02	5.08	4.958	5.939	5.123	5.391	5.484	5.285	5.299	5.099	5.244	5.238	5.423	5.438	5.151	5.765	5.313	6.274	5.366	5.141
HP1BP3	HP1BP3	50809	1	21069170	21113181	1p36.12	NM_016287.3	NP_057371.2	8.843	8.914	9.072	9.33	8.586	9.798	9.098	8.372	9.695	9.772	9.336	8.898	8.943	9.589	9.446	9.516	9.095	9.03	9.665	8.929	8.646	9.538	9.272	9.127	8.809	9.164	9.788	8.951	9.641	8.755	9.916	8.618	9.437	9.247	8.815	8.757	9.2	9.111	8.59	9.48	9
EIF4G3	EIF4G3	8672	1	21132784	21503381	1p36.12	NM_001198801.1	NP_001185730.1	7.833	7.957	8.31	8.085	7.759	8.665	8.536	7.534	8.146	8.968	8.02	7.878	8.665	7.887	9.078	8.637	7.853	7.831	8.209	8.159	7.393	7.465	7.867	8.231	8.644	8.475	8.628	8.39	9.114	7.992	8.911	8.352	8.478	7.961	7.601	8.021	8.487	7.599	7.991	8.977	8.064
ECE1	ECE1	1889	1	21543739	21672034	1p36.1	NM_001113349.1	NP_001106820.1	7.391	8.682	9.526	8.04	7.95	9.063	9.314	5.344	8.202	9.054	9.165	8.608	7.905	8.255	7.807	8.966	7.705	8.026	7.581	6.282	7.199	6.901	7.746	8.285	7.944	8.055	7.371	7.917	8.528	7.584	8.005	7.772	7.991	7.868	7.746	8.519	8.601	9.41	7.825	8.973	8.677
LOC100506801	LOC100506801	100506801	1	21619782	21626362	1p36.1				4.577	4.619	4.623			4.603		4.795		4.438	5.041				4.614		4.561	4.502		4.491		5.309	5.189	4.592	4.467				4.545	5.011	4.569	4.693		4.488	4.446	4.596		4.588	4.764	4.588
NBPF3	NBPF3	84224	1	21766582	21811393	1p36.12	NM_001256416.2	NP_001243346.1	7.459	6.582	7.249	6.916	7.171	8.514	6.755	5.203	6.155	6.879	6.496	6.981	6.463	7.034	5.919	6.474	6.744	6.933	6.659	6.159	6.049	5.341	6.153	7.15	6.808	6.488	6.31	6.173	6.752	6.385	6.745	6.76	6.549	6.562	6.199	6.194	6.18	6.934	6.036	7.044	6.368
PFN1P10	PFN1P10	767853	1	21785916	21786694	1p36.12			4.523	4.492	4.554	5.186			4.436			4.554	4.748				4.693		4.836			4.756	4.574		4.799	4.546	5.341			4.756	4.852				5.21	4.845					4.678	4.638
ALPL	ALPL	249	1	21835857	21904905	1p36.12	NM_001127501.2	NP_000469.3	4.667	4.56	7.97	4.46	4.48	4.495	4.836		4.513	5.382	4.569	4.478	4.541		4.452	4.547	4.499	4.532	4.471	4.557	4.616	4.541	4.605	4.484	4.476		4.429	4.447	4.445	4.781		4.53	4.453	4.719	4.517	4.46	4.465		5.019	5.084	4.748
RAP1GAP	RAP1GAP	5909	1	21922707	21995856	1p36.1-p35	NM_002885.2	NP_002876.2	6.249	4.958	5.151	4.736	5.314	4.885	5.138		4.942	5.137	4.836	6.146	7.103	6.263	5.162	6.866	5.626	5.759	6.212	5.046	6.661	5.008	4.901	4.716	4.834	7.351	5.341	4.831	5.585	6.022	8.256	5.402	5.285	4.877	6.736	5.621	4.899	4.818	4.967	5.624	6.616
USP48	USP48	84196	1	22004791	22109688	1p36.12	NM_001032730.1	NP_115612.4	6.433	6.393	6.994	6.714	6.22	7.311	6.562	7.517	7.019	7.396	7.019	6.406	6.843	7.021	7.261	6.917	6.549	6.58	6.871	7.202	7.461	6.794	7.041	7.642	6.928	7.658	8.482	7.69	8.536	7.504	8.433	7.267	7.676	7.382	5.761	6.165	6.636	6.481	6.165	6.587	6.27
LDLRAD2	LDLRAD2	401944	1	22138757	22151714	1p36.12	NM_001013693.2	NP_001013715.2	6.618	6.758	7.572	6.245	6.24	6.697	6.594		6.511	8.214	6.324	6.625	7.344	6.364	6.564	7.84	6.764	6.98	6.218	7.008	6.621	6.402	6.336	6.174	7.012	7.058	7.855	7.326	7.218	6.031	7.032	7.023	7.296	6.832	6.85	7.524	7.449	6.782	6.807	6.421	6.726
HSPG2	HSPG2	3339	1	22148724	22263790	1p36.1-p34	NM_005529.5	NP_005520.4	7.441	8.255	9.431	6.974	7.635	8.029	7.74	6.982	7.078	10.118	7.383	7.671	8.351	7.736	8.06	9.537	7.94	8.536	6.661	6.985	8.252	6.569	6.931	6.616	8.02	8.493	9.742	9.116	8.896	7.313	8.867	8.602	8.716	8.258	8.393	9.099	9.249	8.334	8.516	7.642	8.578
CELA3A	CELA3A	10136	1	22328148	22339035	1p36.12	NM_005747.4	NP_005738.4																						5.723
LINC00339	LINC00339	29092	1	22351683	22357717	1p36.12			5.537	5.99	6.422	5.734	5.94	6.438	5.692		5.464	6.205	5.453	5.012	5.491	5.909	5.764	5.681	5.836	5.821	6.389	5.374	5.699	6.075	6.85	5.249	6.042	6.442	6.36	6.515	6.717	6.252	7.579	6.985	6.112	6.351	6.41	5.709	6.829	5.054	5.245	6.15	5.751
CDC42	CDC42	998	1	22379119	22419436	1p36.1	NM_001039802.1	NP_426359.1	6.255	6.802	7.244	6.931	6.506	7.659	6.986		7.318	7.196	7.225	7.32	7.04	7.057	6.809	7.207	6.855	6.262	6.406	6.976	6.564	5.963	6.708	7.395	7.712	7.251	7.216	7.08	7.364	6.442	7.258	6.994	6.888	6.478	5.618	6.491	7.111	6.605	6.389	6.983	6.892
WNT4	WNT4	54361	1	22443797	22469519	1p36.23-p35.1	NM_030761.4	NP_110388.2	5.993	5.427	6.263	5.774	6.496	5.655	5.511		5.737	5.792	5.201	5.609	5.494	5.937	5.303	5.8	5.868	5.732	5.403	5.894	5.384	5.51	5.658	5.583	5.32	5.591	5.655	5.55	5.436	5.521	5.42	5.537	5.814	5.672	5.348	6.798	6.033	5.603	5.779	5.666	6.399
ZBTB40	ZBTB40	9923	1	22778343	22857650	1p36	NM_014870.3	NP_055685.3	7.164	6.768	6.313	6.527	7.933	7.11	6.958		6.547	6.891	6.611	7.017	7.321	7.284	6.951	6.697	6.718	6.927	7.042	7.311	7.324	7.066	7.046	7.735	7.394	7.121	7.24	7.349	7.448	6.882	7.715	7.187	7.233	6.662	6.32	6.835	6.866	6.941	6.187	6.984	6.537
EPHA8	EPHA8	2046	1	22890003	22930087	1p36.12	NM_020526.3	NP_065387.1	5.632	5.611	5.698	5.646	6.021	5.09	5.519		5.59	5.383	5.403	5.563	5.421	5.161	5.08	5.665	5.181	5.663	5.527	5.831	5.41	5.353	5.64	5.212	5.423	5.929	5.184	5.635	5.542	5.703	5	6.165	5.565	5.319	5.341	5.707	5.127	5.577	5.674	5.369	5.464
C1QC	C1QC	714	1	22970117	22974603	1p36.11	NM_172369.3	NP_758957.2	6.178	6.496	5.853	5.943	6.095	5.706	6.062		6.405	6.074	6.334	5.978	5.968	5.224	5.589	5.755	6.216	5.972	6.076	6.25	6.634	6.258	5.897	6.053	5.797	5.284	5.813	5.564	5.996	5.818	6.418	6.293	5.877	6.064	6.204	6.391	6.187	5.941	6.208	5.799	6.379
C1QB	C1QB	713	1	22979681	22988029	1p36.12	NM_000491.3	NP_000482.3	4.847	5.083	5.155	5.344	4.729	5.048	5.626		5.147	4.901	5.604	5.47	5.204	4.62	5.125	4.639	5.453	5.16	5.054	5.048	5.322	4.724	5.031	5.601	5.067	5.233	5.118	5.297	5.251	5.153	4.843	5.3	5.231	5.265	5.366	5.314	4.804	5.341	5.543	4.92	5.541
EPHB2	EPHB2	2048	1	23037330	23247993	1p36.1-p35	NM_004442.6	NP_004433.2	5.677	6.202	5.788	5.003	5.004	5.826	8.15	5.339	6.513	6.765	6.855	10.261	7.526	5.939	6.036	5.658	5.828	7.282	5	5.023	5.012	5.058	5.774	4.867	6.574	4.755	4.9	4.956	4.985	5.512	4.956	5.246	4.887	5.126	6.506	6.957	7.501	6.389	6.626	5.733	7.086
LACTBL1	LACTBL1	646262	1	23279535	23291923	1p36.12			4.662	4.943	5.053	5.055			4.623		5.069	4.439	5.04	4.938		4.582	4.659	4.585	4.821	4.521	4.707	4.786	4.972	5.064	4.617	4.428	4.623		4.483		4.511	4.619	4.53	5.079			5.107	4.635	4.713	4.892	4.976	4.626	4.793
C1orf234	C1orf234	729059	1	23337326	23342343	1p36.12	NM_001242521.1	NP_001229450.1	5.305	4.458	4.633	4.792	5.226		4.655		4.631	4.787	4.811	5.547		4.587	4.699	4.558	5.076		4.695	5.107	4.966	5.06	4.702	4.581	4.798		4.81	4.755	4.669	4.716	4.68	4.669	4.66	5.028	4.658		4.592	4.729	4.551	4.871	4.494
KDM1A	KDM1A	23028	1	23345940	23410184	1p36.12	NM_001009999.2	NP_055828.2	9.214	8.996	9.317	9.89	8.844	9.693	9.389	7.985	9.23	9.425	9.747	9.578	9.146	10.125	10.016	10.094	9.974	10.097	10.133	9.808	9.781	10.286	9.217	9.608	9.542	9.461	9.262	9.144	9.988	9.038	10.461	9.561	9.442	9.229	9.055	8.821	9.65	9.073	8.25	9.54	8.959
LUZP1	LUZP1	7798	1	23410515	23495351	1p36	NM_033631.3	NP_361013.3	6.267	7.137	7.788	7.527	6.694	7.713	7.794	6.492	6.923	7.761	7.406	7.253	7.466	7.288	7.236	7.307	7.461	6.441	6.828	6.899	6.63	6.473	6.202	7.165	8.147	7.546	7.632	7.643	8.258	7.361	8.317	7.6	7.809	7.811	6.926	7.297	8.041	7.136	7.792	7.328	6.781
HTR1D	HTR1D	3352	1	23518387	23521222	1p36.3-p34.3	NM_000864.4	NP_000855.1	5.809	6.054	5.379	6.082	5.35	5.808	5.488		5.184	4.967	6.421	8.859	7.698	7.267	6.172	6.18	7.362	5.044	5.119	5.542	5.242	5.181	5.146	5.153	5.333	5.167	4.921	5.378	5.051	5.294	4.96	4.937	4.935	4.872	8.094	7.095	8.207	6.023	8.315	6.609	6.454
HNRNPR	HNRNPR	10236	1	23631180	23670857	1p36.12	NM_005826.3	NP_005817.1	9.51	9.568	9.265	9.716	9.467	9.887	9.666	9.633	10.136	9.59	9.879	9.838	9.998	9.892	9.916	9.922	9.751	10.019	10.003	10.003	9.862	10.142	9.842	10.225	9.783	9.24	10.037	9.403	9.843	8.9	9.44	9.396	9.915	9.546	9.491	9.225	9.6	9.155	8.936	9.357	9.518
ZNF436	ZNF436	80818	1	23685940	23696357	1p36	NM_001077195.1	NP_001070663.1	6.064	5.474	5.827	6.238	6.05	5.665	6.272	4.987	8.676	7.976	7.735	5.788	6.256	6.213	6.373	6.616	6.194	5.62	5.642	5.938	5.906	5.711	5.829	5.904	5.868	6.04	6.324	5.538	6.307	5.165	6.279	6.165	6.06	6.086	5.308	5.83	6.18	6.426	5.592	7.222	7.187
ZNF436-AS1	ZNF436-AS1	148898	1	23695463	23698330	1p36.12			5.437	5.524	5.528	5.562	5.447	5.265	5.876		6.4	6.512	5.75	5.267	5.944	6.062	6.143	6.191	6.229	5.97	4.845	5.907	5.956	5.282	5.4	5.526	5.384	5.385	6.266	5.178	6.324	5.224	5.925	5.739	6.194	5.908	5.828	6.079	5.681	6.424	5.617	6.479	5.969
TCEA3	TCEA3	6920	1	23707401	23751272	1p36.12	NM_003196.1	NP_003187.1	8.46	5.401			8.571				4.461	5.481		4.972		5.588	4.732	5.864	4.858	5.621	4.449	4.574				4.686		5.646				4.479						4.791	5.416	7.512		7.078
ASAP3	ASAP3	55616	1	23755055	23810750	1p36.12	NM_017707.3	NP_060177.2	5.964	6.198	5.829	5.806	7.246	5.537	6.079	4.952	5.903	7.55	5.781	4.926	5.133	5.963	5.591	5.037	5.889	4.892	4.866	4.885	5.852	4.863	4.926	4.789	5.209	5.685	6.098	5.709	5.785	5.48	5.901	5.75	5.338	5.426	5.228	5.608	6.245	5.731	5.639	5.736	5.402
E2F2	E2F2	1870	1	23832919	23857712	1p36	NM_004091.3	NP_004082.1	6.55	5.612	5.935	6.28	6.262	6.02	5.863		6.668	6.028	6.054	6.762	6.581	6.678	6.551	5.832	6.415	5.906	8.559	6.528	6.667	7.197	7.67	5.09	5.891	6.195	6.214	6.479	6.676	6.32	6.687	5.746	6.867	7.443	6.027	6.267	5.77	5.325	5.176	7.026	5.95
ID3	ID3	3399	1	23884420	23886285	1p36.13-p36.12	NM_002167.4	NP_002158.3	7.462	6.589	8.702	9.304	7.531	7.949	9.344	10.183	9.596	9.322	8.989	6.063	9.079	8.763	8.211	4.906	8.524	5.178	7.111	4.702	6.116	7.349	6.658	6.184	9.305	5.729	7.777	7.693	8.922	5.984	7.392	7.528	7.465	6.383	9.061	9.646	8.022	6.123	8.391	9.908	7.399
RPL11	RPL11	6135	1	24018268	24022915	1p36.1-p35	NM_001199802.1	NP_000966.2	11.969	11.998	12.106	12.51	11.924	12.073	12.042	12.594	12.262	12.416	12.482	12.358	12.425	12.369	12.435	12.464	12.398	12.457	12.567	12.781	12.522	12.487	12.67	12.49	12.325	11.666	12.739	12.445	12.739	11.954	12.597	12.383	12.79	12.3	11.83	11.824	12.526	12.366	11.585	12.177	11.797
TCEB3	TCEB3	6924	1	24069855	24088549	1p36.1	NM_003198.2	NP_003189.2	7.432	7.618	7.986	8.023	7.442	7.846	8.321	6.619	8.305	8.109	8.182	7.458	8.307	7.515	8.084	7.938	7.032	7.383	7.578	7.448	8.18	7.256	7.813	8.096	8.857	7.916	8.458	8.584	9.035	7.83	8.817	8.735	9.09	8.811	6.975	7.984	8.356	7.75	7.753	8.497	7.715
TCEB3-AS1	TCEB3-AS1	100506963	1	24086871	24104787				5.085	4.448	5.278	4.966	5.656	5.231	5.318		4.991	5.659	5.03	5.328	6.348	5.611	5.988	5.549	5.474	5.515	5.596	5.298	6.609	5.5	6.463	4.963	5.182	5.58	5.763	5.678	6.734	5.242	6.835	6.309	6.213	5.929	4.633	4.88	5.923	5.709	4.437	6.033	6.134
PITHD1	PITHD1	57095	1	24104875	24114722	1p36.11	NM_020362.4	NP_065095.2	6.684	6.915	6.569	7.214	7.008	7.617	7.951	7.564	7.806	7.353	8.192	8.089	7.554	7.555	7.48	7.65	7.465	7.284	7.206	7.703	8.624	7.371	7.661	8.683	7.218	7.587	7.509	7.46	8.031	6.675	7.463	7.077	7.473	7.402	6.43	6.076	7.196	6.524	7.145	6.934	6.709
LYPLA2	LYPLA2	11313	1	24117645	24122029	1p36.11	NM_007260.2	NP_009191.1	5.355	5.722	5.392	6.004	5.868	5.659	5.987	5.697	5.694	5.867	6.179	6.538	6.834	6.386	5.957	6.797	6.326	6.29	5.682	5.763	6.254	5.981	6.242	6.105	6.55	5.885	6.092	6.898	7.062	5.995	6.717	6.262	7.139	7.14	5.597	5.834	6.341	5.903	5.589	6.482	6.154
GALE	GALE	2582	1	24122088	24127294	1p36-p35	NM_000403.3	NP_001008217.1	6.869	7.174	6.485	6.195	7.036	6.816	7.577	6.402	7.35	6.805	8.041	8.111	8.593	7.975	7.467	8.145	8.259	7.182	6.579	6.659	7.544	6.42	6.441	7.956	7.785	8.349	7.739	8.27	8.94	7.576	9.385	7.941	8.428	8.59	7.357	7.369	8.276	8.026	6.931	7.287	8.246
HMGCL	HMGCL	3155	1	24128366	24151949	1p36.1-p35	NM_000191.2	NP_000182.2	6.87	6.192	7.011	6.009	7.434	7.493	7.587	5.815	6.978	7.796	7.238	8.48	8.097	7.672	7.826	7.912	8.639	7.623	6.347	6.517	6.584	6.582	6.325	6.343	6.58	8.089	7.462	6.779	8.044	7.057	7.754	6.64	5.982	5.987	5.908	6.977	7.886	6.774	6.655	7.07	7.575
FUCA1	FUCA1	2517	1	24171571	24194859	1p34	NM_000147.4	NP_000138.2	6.651	7.071	5.547	5.076	7.097	7.018	7.603	5.611	7.405	7.427	6.643	7.611	8.239	7.565	7.271	8.801	7.22	6.808	5.21	7.317	6.435	5.689	6.983	5.943	4.949	8.486	7.791	6.737	9.244	6.709	7.87	6.304	6.737	6.599	5.996	7.634	6.719	7.824	6.402	6.69	8.147
CNR2	CNR2	1269	1	24200459	24239817	1p36.11	NM_001841.2	NP_001832.1	5.12	5.163	4.786	4.945	4.843	4.748	5.14		4.933	4.434	5.434	4.762	4.999	4.966	4.75	4.582	5.24	4.769	6.242	7.706	5.27	4.888	5.005	4.494		4.43	4.843	4.664	4.635	4.678	5.036	5.008	4.591	4.668	5.175	4.878	5.2	5.113	5.113	4.864	4.914
PNRC2	PNRC2	55629	1	24286300	24289949	1p36.11	NM_017761.3	NP_060231.1	9.916	9.384	9.807	10.026	9.465	10.241	9.325	7.688	9.51	9.782	9.621	10.017	10.083	9.828	10.326	10.298	10.002	10.135	9.694	10.249	10.496	10.069	9.999	10.205	10.189	9.359	10.141	9.647	10.018	9.273	10.198	9.523	9.882	9.745	8.528	9.627	9.953	9.654	9.341	10.26	9.304
SRSF10	SRSF10	10772	1	24290836	24306953	1p36.11	NM_001191007.1	NP_001177938.1	7.783	7.534	7.544	8.061	7.544	8.19	7.98		7.918	7.926	7.521	8.183	8.117	8.105	8.479	8.244	7.575	8.379	8.091	8.113	7.85	8.26	8.078	8.472	8.002	8.054	8.342	7.852	8.074	7.344	8.157	7.742	8.006	7.638	7.098	7.532	7.895	7.254	6.992	8.324	7.288
MYOM3	MYOM3	127294	1	24382530	24438665	1p36.11	NM_152372.3	NP_689585.3	5.048	5.085	5.085	5.113	4.999	4.895	5.142		5.075	4.983	5.212	6.663	7.733	5.981	4.934	6.306	5.247	5.356	5.115	5.165	5.263	5.058	5.065	4.839	5.094	4.869	4.865	4.95	5.03	5.289	4.866	5.076	4.855	5.095	5.908	5.021	5.273	5.734	5.273	5.456	5.099
IL22RA1	IL22RA1	58985	1	24446260	24469775	1p36.11	NM_021258.3	NP_067081.2	5.053	4.998	5.023	4.913	4.988	4.832	5.426		4.961	4.964	5.111	7.609	7.1	5.467	5.945	7.371	7.32	5.406	4.901	5.009	5.009	4.981	5.023	4.785	5.083	5.535	4.914	4.995	5.018	5.19	4.925	4.996	5.255	5.448	5.522	5.239	5.357	5.268	5.055	6.154	4.823
IFNLR1	IFNLR1	163702	1	24480646	24513765	1p36.11	NM_173064.2	NP_775087.1	5.354	5.243	5.09	4.97	6.047	5.241	5.241		5.533	4.938	5.883	6.027	6.657	6.628	7.088	5.742	6.705	5.483	5.051	5.073	5.189	5.197	6.047	4.972	4.992	6.451	5.235	4.886	5.001	5.158	4.785	4.964	4.81	5.347	5.346	6.053	6.33	5.458	5.117	5.936	6.251
GRHL3	GRHL3	57822	1	24645811	24690970	1p36.11	NM_001195010.1	NP_001181939.1	5.123	4.896	4.942	4.895	6.118	4.774	4.893		5.034	4.744	5.028	4.878	5.409	4.71	6.177	5.302	5.178	4.771	5.11	5.052	4.995	4.891	5.053	4.767	4.928	4.69	4.762	4.901	4.855	4.884	4.732	4.904	4.885	4.901	5.027	4.906	5.003	4.897	4.979	8.144	7.604
STPG1	STPG1	90529	1	24683488	24741587	1p36.11	NM_001199012.1	NP_001185942.1	5.627	6.303	6.433		6.327	6.892	5.319		5.728	5.196	6.162	6.719	6.837	6.472	6.645	5.859	6.575	6.17	4.441	5.459	5.373		4.935	6.575	6.953	6.663	7.544	6.034	6.802	5.998	6.703	6.367	6.953	6.777	5.731	5.814	6.975	5.825	6.013	5.581	6.341
NIPAL3	NIPAL3	57185	1	24742244	24799473	1p36.12-p35.1	NM_020448.4	NP_065181.1	6.225	6.984	7.374	4.666	7.89	7.245	7.312	4.88	7.444	7.379	7.239	7.069	7.117	6.359	7.261	7.263	7.272	6.917	6.257	7.071	6.626	6.551	7.27	7.267	7.132	7.02	8.519	7.308	8.183	6.112	7.295	8.053	8.708	8.571	5.76	5.885	6.77	6.725	7.485	6.062	6.829
RCAN3	RCAN3	11123	1	24828840	24863510	1p35.3-p33	NM_001251978.1	NP_001238906.1	5.582	6.93	6.508		7.082	7.823	7.152		7.634	7.572	7.683	7.664	6.897	7.083	7.063	7.707	7.583	6.228	6.36	5.611		6.626	5.162	6.622	7.189	7.039	8.617	7.507	8.505	6.923	7.993	8.033	7.632	7.641	6.788	6.254	7.039	7.232	5.254	7.067	6.26
LOC100506985	LOC100506985	100506985	1	24865763	24882515				5.985	6.118	5.633	5.625	5.833	6.432	6.603		5.999	6.139	6.031	6.554	6.058	6.24	6.119	6.565	6.542	6.135	5.395	6.492	5.12	5.812	5.698	5.903	6.062	6.057	6.462	6.224	6.242	6.191	5.901	5.46	6.56	6.274	6.129	5.614	5.964	5.597	5.913	5.201	5.526
NCMAP	NCMAP	400746	1	24882566	24935818	1p36.11	NM_001010980.4	NP_001010980.1	5.224	4.885	5.165	4.731	5.385	4.78	4.919		5.027	6.967	5.356	5.232	5.507	5.228	5.246	6.106	6.243	4.914	5.345	5.221	5.191	5.216	5.584	4.944	5.403	5	4.818	5.256	5.122	4.964	5.024	5.063	4.971	5.385	5.279	5.509	5.067	5	4.9	4.879	5.116
SRRM1	SRRM1	10250	1	24969593	24999772	1p36.11	NM_005839.3	NP_005830.2	8.146	8.166	8.072	8.534	7.884	9.068	8.313	8.071	8.524	8.331	8.615	8.336	8.45	9.143	9.255	8.638	8.567	8.329	8.937	8.958	8.807	8.866	8.72	8.98	8.598	8.107	8.568	8.299	8.852	7.95	8.38	8.339	8.067	8.059	8.017	7.981	8.439	7.595	7.916	8.889	8.023
CLIC4	CLIC4	25932	1	25071759	25170815	1p36.11	NM_013943.2	NP_039234.1	7.603	9.522	10.753	9.19	7.667	10.159	9.611	8.702	9.141	10.235	9.58	7.451	4.842	8.517	8.501	7.872	8.237	8.162	7.514	7.407	7.809	7.344	8.206	7.204	8.829	9.141	9.453	8.867	9.223	8.495	8.775	9.147	8.764	8.373	7.286	8.573	9.699	8.766	9.928	7.642	7.327
RUNX3	RUNX3	864	1	25226001	25291501	1p36	NM_001031680.2	NP_004341.1	4.762	4.688	4.756	4.681	4.696	4.565	4.844	4.816	4.799	4.697	5.217	5.664	5.1	6.738	4.647	4.719	4.809	8.006	5.839	8.12	4.795	5.233	8.228	9.222	6.415	8.484	9.036	7.903	9.606	8.043	8.884	4.753	4.665	5.178	5.504	7.044	7.098	5.729	4.7	6.265	6.083
SYF2	SYF2	25949	1	25548766	25559013	1p36.11	NM_207170.3	NP_997053.1	6.492	6.402	6.588	7.064	6.486	7.254	6.954		6.783	7.163	6.852	7.781	7.172	7.26	7.214	7.116	7.399	7.306	6.627	7.171	6.472	7.047	7.365	8.027	8.158	7.52	7.519	7.408	7.37	6.957	7.559	7.162	7.028	6.963	6.082	6.055	6.441	6.304	6.774	6.293	6.536
RHD	RHD	6007	1	25598976	25656936	1p36.11	NM_001127691.1	NP_057208.2																					5.914
TMEM50A	TMEM50A	23585	1	25664788	25688852	1p36.11	NM_014313.3	NP_055128.1	8.439	8.923	9.518	9.451	8.719	9.639	9.513	8.989	9.08	9.593	9.008	9.657	9.148	9.039	9.127	9.347	8.824	8.881	9.18	9.244	9.297	8.879	9.618	9.372	10.15	9.147	9.311	9.244	9.336	8.768	9.444	9.21	8.502	8.297	8.573	8.973	8.969	9.23	9.517	9.292	8.703
TMEM57	TMEM57	55219	1	25757348	25826698	1p36.11|1p36.11	NM_018202.4	NP_060672.2	6.927	7.349	7.243	8.432	7.497	7.201	7.781	7.405	7.375	7.974	7.408	8.076	7.688	7.191	7.613	7.539	7.512	7.889	7.97	8.001	7.936	8.206	8.461	7.105	8.178	7.343	7.442	7.395	7.36	6.854	7.328	7.226	7.005	7.531	6.38	7.248	7.572	7.189	6.823	6.329	6.59
LDLRAP1	LDLRAP1	26119	1	25870075	25895377	1p36-p35	NM_015627.2	NP_056442.2	5.633	6.165	6.444	5.972	6.319	6.536	6.074	5.979	6.21	6.974	6.877	6.437	5.992	6.278	6.621	5.934	5.341	5.471	4.787	6.033	6.617	4.807	7.093	5.82	5.715	6.545	7.068	6.953	6.723	5.629	7.384	7.337	6.045	6.37	5.589	5.726	6.347	6.398	5.735	6.576	5.895
MAN1C1	MAN1C1	57134	1	25943958	26112698	1p35	NM_020379.2	NP_065112.1	5.274	5.491	5.445	5.028	6.099	5.797	5.45	5.211	5.527	6.858	5.313	5.132	5.185	5.389	5.229	4.985	5.181	5.125	5.228	6.63	5.225	5.171	5.319	5.468	5.153	7.786	5.933	6.497	5.634	5.226	6.536	6.974	5.157	5.615	5.222	6.031	5.185	5.13	5.284	5.261	5.063
SEPN1	SEPN1	57190	1	26126666	26144713	1p36.13	NM_206926.1	NP_996809.1	7.593	8.239	8.455	8.174	8.206	8.887	8.606	6.688	8.662	9.327	8.678	7.303	8.8	8.862	8.222	6.561	7.25	7.767	6.609	8.68	7.184	6.047	6.728	8.201	8.666	10.207	10.099	9.023	9.183	8.713	9.104	9.689	8.844	8.731	8.365	8.556	8.074	8.669	8.172	8.611	8.22
MTFR1L	MTFR1L	56181	1	26146396	26159433	1p36.11	NM_001099626.1	NP_001093095.1	7.656	7.704	7.975	7.668	7.763	8.701	8.05	7.039	8.421	8.595	8.275	8.081	7.857	8.045	7.954	7.07	7.575	7.32	7.193	8.019	8.238	7.642	7.089	7.941	8.4	8.524	8.616	8.427	8.356	7.997	8.944	8.426	8.414	8.193	7.217	8.35	8.198	7.807	7.311	8.325	7.681
LOC646471	LOC646471	646471	1	26146444	26150097	1p36.11			5.516	4.936	4.814	5.385	5.822	5.075	4.958		5.127	5.517	5.417		5.243	5.277	5.433	5.437	5.08	5.461	5.202	5.297	5.175	5.291	5.384	5.093	4.643	5.593	6.043	5.147	5.557	4.981	5.445	5.028	5.509	5.335	5.049	5.359	5.248	4.838	4.666	5.433	4.839
AUNIP	AUNIP	79000	1	26158403	26185949	1p36.11	NM_024037.1	NP_076942.1	5.885	5.42	5.879	6.759	5.468	6.456	5.981		6.001	5.518	5.518	6.353	6.275	6.409	6.693	6.151	5.962	5.898	6.224	6.833	7.206	6.026	6.393	6.122	5.619	5.817	6.502	5.762	6.595	5.79	6.336	5.961	5.864	6.018	5.093	5.297	5.753	5.079	4.689	6.483	6.189
PAQR7	PAQR7	164091	1	26187974	26197744	1p36.11	NM_178422.5	NP_848509.1	5.518	6.228	6.213	5.823	5.928	6.351	5.684	5.245	5.252	5.818	5.651		5.556	6.731	6.325	6.283	5.146	5.54	4.552	4.778	5.609		4.978	6.677	6.686	6.388	4.996	5.17	5.617	4.981	5.992	4.561	4.695	4.643	5.231	6.836	6.532	6.254	5.863	7.434	6.94
STMN1	STMN1	3925	1	26210676	26233368	1p36.11	NM_005563.3	NP_001138926.1	7.827	8.837	8.177	9.118	7.839	9.529	7.913	7.251	9.12	8.897	8.521	7.335	7.381	8.711	8.65	7.847	7.857	9.146	9.896	9.155	8.609	9.929	8.117	8.264	8.29	8.085	8.507	8.883	8.158	8.398	8.911	7.622	8.459	8.49	7.484	7.36	8.272	8.179	7.312	8.532	7.776
PAFAH2	PAFAH2	5051	1	26286257	26324648	1p36	NM_000437.3	NP_000428.2	7.093	6.292	6.992	6.797	7.479	6.788	7.516	4.504	7.034	7.182	7.029	8.436	7.845	7.191	7.339	7.251	7.571	7.094	7.142	6.146	6.84	7.079	6.832	7.099	7.052	7.513	7.385	7.411	6.838	6.92	7.466	7.301	7.38	7.637	6.887	7.286	7.261	7.236	6.35	7.375	7.707
EXTL1	EXTL1	2134	1	26348270	26362954	1p36.1	NM_004455.2	NP_004446.2	5.59	5.665	5.735	5.602	5.638	5.386	5.532		5.639	7.859	5.768	5.332	5.47	5.414	5.363	5.527	5.632	5.548	5.719	5.744	5.705	5.567	5.751	5.307	5.853	7.968	8.427	7.846	7.686	5.836	6.355	7.644	6.001	6.08	5.577	5.459	5.619	5.59	5.652	5.812	6.07
SLC30A2	SLC30A2	7780	1	26364512	26372629	1p35.3	NM_001004434.1	NP_115902.1	5.401	5.741	5.373	5.674	5.644	5.441	5.985		5.697	5.646	5.7	5.652	5.929	5.645	5.649	5.77	5.851	5.594	5.622	5.347	5.705	5.072	5.584	5.404	5.414	5.12	5.344	4.917	5.439	5.295	5.412	5.294	5.069	5.523	5.606	5.542	5.798	5.613	5.414	5.475	5.462
TRIM63	TRIM63	84676	1	26377795	26394125	1p34-p33	NM_032588.3	NP_115977.2		4.563	4.52	4.438													4.517			4.532	4.68		4.519	4.491	4.512	7.012	6.24	5.859	8.02	7.464	9.733	5.51	5.72	5.819					4.438	4.47
PDIK1L	PDIK1L	149420	1	26437655	26452039	1p36.11	NM_001243532.1	NP_001230461.1	6.747	6.121	6.351	6.271	6.678	6.457	6.898	4.544	6.849	6.39	7.172	7.579	7.221	6.834	7.435	7.234	7.312	6.487	7.129	7.181	8.344	7.667	7.438	6.533	6.12	6.425	6.738	6.135	6.183	6.168	6.985	6.177	6.347	6.1	5.837	5.993	6.266	6.357	5.907	6.496	6.839
FAM110D	FAM110D	79927	1	26485510	26489119	1p36.11	NM_024869.2	NP_079145.2	4.499	5.101	4.871	4.588	5.165	5.231	4.904		4.886	4.676	5.035	5.296	5.353	4.849		4.86	5.343	4.776	4.962	5.166	5.292	5.116	4.981	4.737	4.858	4.928	4.906		4.572	5.247		5.264	5.217	4.889	4.992	4.983	5.023	4.803	4.759	5.044	5.258
ZNF593	ZNF593	51042	1	26496387	26497364	1p36.11	NM_015871.4	NP_056955.2	6.995	7.446	7.761	8.678	7.403	8.033	8.348	7.35	7.552	7.042	8.046	8.198	8.809	7.946	7.959	7.935	8	8.203	7.116	8.843	8.724	7.442	8.346	8.527	8.233	7.641	8.123	8.104	8.131	8.058	9.03	9.24	8.269	7.907	7.604	7.516	7.968	8.313	6.925	8.068	8.463
CNKSR1	CNKSR1	10256	1	26503980	26516376	1p36.11	NM_006314.2	NP_006305.2	6.305	5.07	5.027	4.914	7.213	5.197	5.033		5.019	4.899	5.179	6.559	7.012	7.002	7.078	7.138	6.908	6.161	5.087	4.979	5.24	5.036	5.076	4.884	4.921	4.862	4.868	5.013	4.849	4.825	4.803	4.864	4.882	4.961	4.951	5.146	5.77	5.351	4.932	5.813	6.794
CEP85	CEP85	64793	1	26560643	26605529	1p36.11	NM_022778.2	NP_073615.2	7.103	7.567	7.319	7.963	7.196	8.047	7.436	6.194	8.117	7.97	7.838	7.637	8.054	8.035	7.642	7.705	7.587	7.917	8.145	8.35	8.665	8.089	7.74	8.007	7.262	7.402	7.999	7.696	7.611	7.142	7.936	7.373	7.201	7.128	7.059	6.723	7.779	7.581	6.582	7.789	7.396
SH3BGRL3	SH3BGRL3	83442	1	26606212	26608013	1p36.11	NM_031286.3	NP_112576.1	8.134	10.217	10.464	9.875	7.158	10.052	10.493	10.358	8.92	10.512	9.222	9.432	9.934	9.099	8.727	10.231	9.454	9.047	9.675	9.04	8.682	8.493	8.621	9.215	10.637	10.453	10.346	9.568	9.859	8.42	9.603	10.171	9.31	9.087	7.824	9.016	10.357	10.956	9.931	9.144	8.856
UBXN11	UBXN11	91544	1	26608772	26644756	1p36.11	NM_183008.2	NP_663320.2	6.254	6.349	6.09	6.697	6.778	7.088	6.625		6.256	6.735	6.275	6.875	7.031	6.396	7.025	7.31	6.523	6.849	6.645	7.638	6.423	6.117	6.821	6.566	6.575	6.683	7.14	6.925	7.014	6.69	7.353	7.127	6.729	6.393	6.037	6.275	6.744	6.416	5.96	6.392	6.812
CD52	CD52	1043	1	26644410	26647014	1p36	NM_001803.2	NP_001794.2																			7.695	5.788	6.925	4.513
AIM1L	AIM1L	55057	1	26648349	26680621	1p36.11	NM_001039775.3	NP_001034864.2	5.822	5.755	5.677	5.725	6.64	5.478	5.572		5.608	5.55	5.764	6.731	7.539	5.846	7.207	6.581	6.138	6.727	5.604	5.781	5.992	5.551	5.628	5.454	5.509	5.306	5.421	5.544	5.587	5.648	5.468	5.616	5.362	5.642	6.03	5.613	6.139	5.692	5.8	5.593	6.805
ZNF683	ZNF683	257101	1	26688124	26699285	1p36.11	NM_001114759.1	NP_775845.2	5.692	5.839	6.001	5.898	5.593	5.337	5.428		5.664	5.35	5.759	5.277	5.619	5.014	5.223	5.439	5.593	5.413	5.903	5.607	5.735	5.697	5.76	4.986	5.483	4.932	5.008	5.257	5.461	5.408	5.216	5.767	5.338	5.687	5.97	5.682	5.897	5.724	5.767	5.547	5.622
LIN28A	LIN28A	79727	1	26737258	26756219	1p36.11	NM_024674.4	NP_078950.1	4.621	4.73	4.592	4.671	7.266	4.485	4.669		4.837	4.553	4.634	4.689	4.597	4.678	4.551	4.673	4.868	4.721	4.874	4.898	5.1	4.77	4.829	4.651	4.552	4.616	4.559	4.542	4.607	4.645	4.66	4.735	4.536	4.908	4.592	4.599	5.233	4.739	4.68	4.881	4.656
DHDDS	DHDDS	79947	1	26758772	26797795	1p36.11	NM_205861.2	NP_001230494.1	7.456	7.835	8.557	8.871	8.066	8.604	8.117	5.968	8.371	8.372	8.337	8.653	8.354	8.148	8.263	8.238	7.958	7.828	7.865	8.067	8.245	7.708	8.145	8.421	8.216	8.177	8.42	7.953	8.226	7.72	8.795	8.482	8.101	8.265	7.413	7.585	8.318	7.96	7.976	7.859	8.134
HMGN2	HMGN2	3151	1	26798901	26803133	1p36.1	NM_005517.3	NP_005508.1	9.93	9.637	9.243	9.919	9.525	10.313	9.289	12.779	9.973	10.14	9.623	9.084	9.189	9.351	10.229	9.943	8.888	9.488	10.45	10.185	9.442	10.336	9.401	10.283	9.006	9.327	9.912	9.219	9.064	8.715	10.173	9.016	9.387	8.962	8.528	8.67	9.45	9.306	8.824	9.424	9.041
RPS6KA1	RPS6KA1	6195	1	26856248	26901520	1p	NM_002953.3	NP_001006666.1	7.07	6.98	6.057	6.484	7.056	6.769	7.259		6.82	7.152	7.377	7.654	8.622	7.758	8.084	7.82	8.241	7.302	7.38	8.828	7.296	6.579	7.334	7.791	6.618	7.474	7.963	7.383	7.049	7.346	7.353	6.847	7.894	7.975	6.538	6.978	6.897	6.317	6.239	6.65	7.108
ARID1A	ARID1A	8289	1	27022521	27108601	1p35.3	NM_139135.2	NP_624361.1	8.108	7.538	7.889	9.021	6.623	8.873	7.926	7.769	8.055	8.139	8.13	8.052	8.32	8.142	8.616	8.374	8.377	8.266	8.988	8.506	8.397	8.958	8.51	8.621	7.825	7.961	8.168	7.89	7.835	8.025	8.423	8.041	7.703	7.37	7.582	8.039	8.13	7.565	7.358	8.582	8.28
PIGV	PIGV	55650	1	27114453	27124894	1p36.11	NM_017837.3	NP_060307.2	7.344	6.994	6.748	6.299	7.625	6.981	7.236	5.933	6.415	6.608	6.071	7.799	7.667	7.243	7.304	7.848	7.809	6.925	6.714	7.02	7.108	6.83	7.478	6.972	7.14	7.231	7.48	7.13	7.4	7.152	7.412	6.972	6.986	6.723	6.835	7.288	7.266	7.201	6.686	7.856	7.748
ZDHHC18	ZDHHC18	84243	1	27153200	27182211	1p36.11	NM_032283.2	NP_115659.1	7.933	7.985	7.798	7.965	7.451	8.262	8.207		8.009	7.944	8.238	7.695	7.951	8.001	8.105	8.454	7.63	7.003	7.859	7.3	7.762	7.975	7.736	8.74	7.706	7.896	8.056	7.621	7.714	7.498	8.11	7.314	7.767	7.578	7.701	7.514	8.127	7.662	7.438	8.289	8.067
SFN	SFN	2810	1	27189632	27190947	1p36.11	NM_006142.3	NP_006133.1	8.662	9.204	8.44	5.192	9.024	5.117	5.288		5.638	4.773	7.199	9.876	10.512	10.241	10.501	9.465	10.289	8.747	5.518	5.476	5.588	5.457	7.726	6.597	5.37	5.092	5.393	5.345	5.293	5.807	5.055	4.956	5.314	5.627	9.726	7.966	6.36	8.578	9.379	8.948	10.322
GPN2	GPN2	54707	1	27205872	27216869	1p36.11	NM_018066.3	NP_060536.3	6.811	7.007	6.855	7.093	7.153	7.489	7.325	6.022	7.249	7.366	7.828	7.665	7.413	7.199	7.354	7.127	7.213	7.184	6.543	7.178	7.815	6.736	7.199	7.728	7.341	6.982	7.344	7.656	7.221	6.868	8.15	7.96	7.554	7.394	6.335	6.545	7.809	6.786	6.369	6.853	7.123
GPATCH3	GPATCH3	63906	1	27216978	27226962	1p35.3-p35.1	NM_022078.2	NP_071361.2	5.799	5.815	5.681	6.674	6.181	6.729	6.218		5.83	6.32	6.389	6.607	6.427	6.518	6.363	6.147	5.971	6.382	5.93	6.114	6.561	6.185	5.869	6.878	6.788	6.269	6.617	6.09	6.333	6.283	7.044	6.132	6.103	6.14	5.539	5.652	6.056	5.808	5.554	5.945	6.111
NR0B2	NR0B2	8431	1	27237974	27240567	1p36.1	NM_021969.2	NP_068804.1	4.586	4.619	4.541	4.585	4.481	4.432	4.549		4.68	4.5	4.638	4.66	6.067			4.536	4.739	4.621	4.696	4.619	4.761	4.589	4.542		4.559	4.43	4.432	4.582	4.481	4.556	4.557	4.728	4.569	6.968	4.627	4.54	4.886	4.682	4.656	4.622	4.635
NUDC	NUDC	10726	1	27248212	27273362	1p35-p34	NM_006600.3	NP_006591.1	7.732	7.9	8.158	8.708	7.823	8.788	8.659	9.289	8.24	8.351	8.784	8.788	8.785	8.737	8.403	8.365	8.479	8.81	8.39	8.544	8.956	8.558	8.667	8.673	9.33	7.837	8.677	9.095	9.021	8.166	9.115	8.7	8.5	8.697	8.037	7.467	8.733	7.954	8.032	8.088	8.151
KDF1	KDF1	126695	1	27276046	27286901	1p36.11	NM_152365.2	NP_689578.2	6.072	4.816	4.769	4.83	6.336	4.661	4.735		4.734	4.703	4.795	7.292	6.965	6.544	6.948	6.864	6.41	5.828	4.784	4.847	4.984	4.773	5.263	4.587	4.68	4.593	4.594	4.722	4.817	4.739	4.69	4.72	4.702	5.057	4.667	4.856	4.85	4.724	4.709	4.996	6.513
OSTCP2	OSTCP2	646567	1	27312387	27312842	1p36.11				4.616		4.497	4.512	4.529	4.614			4.877	4.781	5.108	4.859		4.437	4.958	4.694		4.515	4.836	5.055		4.505		4.993	5.164		4.541	4.516	4.616	4.592	4.444	4.767	4.709		4.53	4.501	4.75		4.897	4.799
TRNP1	TRNP1	388610	1	27320194	27327377	1p36.11	NM_001013642.2	NP_001013664.1	5.708	5.805	6.963	6.204	5.725	6.791	6.355		5.894	6.442	6.172	7.272	7.935	7.93	6.239	8.9	7.94	7.893	4.832	4.923	5.095	4.669	5.436	4.76	6.141	6.778	6.929	7.389	6.35	7.062	6.892	6.742	6.849	6.612	8.402	7.686	7.929	6.879	7.608	5.714	5.872
FAM46B	FAM46B	115572	1	27331510	27339333	1p36.11	NM_052943.3	NP_443175.2	5.172	4.674	6.005	5.504	6.652	5.858				5.151	5.132			4.756													5.107	6.065					5.301	5.216			4.611		4.77	4.467	4.671
SLC9A1	SLC9A1	6548	1	27425299	27481621	1p36.1-p35	NM_003047.4	NP_003038.2	7.131	6.693	7.824	7.296	7.887	7.42	7.809	6.086	7.322	7.697	7.671	7.591	7.749	6.919	7.442	7.137	7.548	6.798	6.955	6.491	6.632	6.84	6.446	7.23	7.941	7.594	7.469	7.107	7.288	7.319	8.037	7.867	7.383	7.291	6.543	7.052	7.711	7.078	7.948	7.334	7.812
CHCHD3P3	CHCHD3P3	646572	1	27527320	27527963	1p36.11			5.954	6.327	5.559	6.395		5.39	6.168		6.373	4.723	5.432	6.187	5.895	5.484	5.487	4.972	5.233	5.076	5.952	6.679	6.577	6.089	6.696	6.478	6.191	7.244	6.678	6.389	6.037	6.619	5.619	5.581	7.039	5.613	5.286	5.603	5.076	6.132	5.664	6.635
NPM1P39	NPM1P39	440577	1	27533420	27534280	1p36.11						5.041		4.511	4.688		4.509					5.071				4.421		5.658	4.612	4.914	5.32		5.273			5.173		4.971		5.137	4.66	5.387	4.481					4.953	4.479
WDTC1	WDTC1	23038	1	27561006	27635124	1p36.11	NM_015023.4	NP_055838.2	7.747	7.264	7.893	8.064	8.111	8.072	7.905		7.812	8.191	7.447	8.13	8.025	7.829	8.088	7.618	8.041	8.142	7.438	7.727	7.748	7.108	7.711	7.624	7.987	7.824	8.3	7.632	7.741	7.703	8.01	7.343	7.824	7.522	6.779	7.186	7.872	7.715	6.883	7.464	7.06
TMEM222	TMEM222	84065	1	27648635	27662891	1p36.11	NM_032125.2	NP_115501.2	7.162	7.01	7.433	7.79	7.817	8.015	7.948	6.438	7.82	7.947	7.974	8.3	7.904	7.593	7.581	8.019	7.742	7.917	7.384	7.735	7.605	7.666	7.224	7.532	8.402	7.406	8.075	7.501	8.112	7.548	8.082	7.647	7.864	7.627	7.201	7.403	7.695	7.113	7.408	7.95	7.441
ACTG1P20	ACTG1P20	644961	1	27650364	27653016	1p36.11			5.753	5.532	5.769	6.421	6.079	6.453	5.663		5.811	6.324	6.008	5.39	6.089	6.026	6.147	6.474	5.424	6.095	6.095	6.29	5.777	6.591	6.177	6.499	5.235	5.745	6.653	6.026	5.913	5.733	6.416	5.664	6.048	5.321	5.303	5.432	5.425	5.745	5.222	5.885	5.759
SYTL1	SYTL1	84958	1	27668482	27680423	1p36.11	NM_032872.2	NP_001180237.1	6.735	5.867	5.74	5.719	7.466	5.563	5.637		5.886	5.601	6.021	7.086	6.786	7.223	7.281	7.27	6.509	6.787	7.152	8.27	6.056	6.748	6.946	5.564	5.668	5.551	5.627	5.596	5.616	5.795	5.5	5.625	5.672	5.789	5.84	5.738	5.871	6.078	5.749	5.894	7.637
MAP3K6	MAP3K6	9064	1	27681669	27693357	1p36.11	NM_004672.3	NP_004663.3	7.226	7.157	8.067	7.737	7.055	7.012	7.063	4.546	7.335	8.009	7.229	6.71	7.334	7.369	7.338	7.202	6.832	6.71	6.44	6.609	6.772	6.156	6.541	8.136	7.337	7.856	8.61	7.95	8.035	7.207	8.345	7.958	8.197	8.041	6.615	7.054	6.737	6.755	6.778	7.434	7.145
FCN3	FCN3	8547	1	27695600	27701315	1p36.11	NM_173452.1	NP_003656.2	6.189	6.306	6.257	6.105	6.184	5.658	5.944		6.159	6.085	6.265	5.932	5.693	5.842	5.909	5.663	6.17	5.945	6.325	6.222	6.538	6.114	6.448	5.495	5.652	5.805	5.748	5.874	6.054	5.981	6.122	6.147	5.776	5.839	6.388	5.915	6.143	6.314	6.028	5.977	6.168
CD164L2	CD164L2	388611	1	27705589	27709823	1p36.11	NM_207397.2	NP_997280.1	4.503				5.12	4.567	4.846			4.555		4.652		6.048			4.499	4.462			4.856		4.834													4.794				4.583
GPR3	GPR3	2827	1	27719147	27722317	1p36.1-p35	NM_005281.3	NP_005272.1	5.152	5.771	5.184	5.32	5.037	5.757	5.308		5.662	5.275	5.289	5.182	5.476	5.648	5.38	5.205	5.751	5.429	5.116	5.294	5.839	5.169	5.467	5.509	5.928	6.184	6.28	5.926	6.218	6.036	6.693	6.239	6.05	7.323	5.309	5.514	5.657	5.6	5.039	5.965	5.275
WASF2	WASF2	10163	1	27730729	27816698	1p36.11	NM_001201404.1	NP_008921.1	7.61	8.134	8.909	9.127	7.869	8.757	8.252	8.421	8.359	9.139	8.647	8.741	7.806	8.222	8.655	8.731	8.9	8.346	8.438	8.561	8.93	8.681	8.621	8.126	9.108	8.17	8.897	8.474	8.881	8.187	9.256	8.797	7.9	7.878	7.709	8.157	9	8.773	7.813	8.497	8.629
AHDC1	AHDC1	27245	1	27860755	27930005	1p36.13	NM_001029882.2	NP_001025053.1	6.787	6.951	7.39	7.748	6.925	6.925	7.365	6.859	6.994	8.141	7.112	6.928	7.08	7.396	7.315	7.268	7.35	7.085	6.84	6.818	7.334	6.941	6.295	6.673	7.395	7.759	7.393	7.444	7.345	6.935	7.732	7.343	7.348	7.075	6.632	6.861	7.305	7.544	7.241	6.765	7.254
FGR	FGR	2268	1	27938800	27961727	1p36.2-p36.1	NM_001042747.1	NP_001036194.1																				5.82
IFI6	IFI6	2537	1	27992571	27998724	1p35	NM_002038.3	NP_002029.3	5.653	6.455	7.245	10.466	7.42	7.368	7.803	7.272	7.049	8.781	7.851	7.734	9.67	7.769	7.766	11.465	7.655	7.175	6.729	6.386	5.783	7.972	10.402	9.664	9.726	8.193	8.758	8.911	8.754	7.373	8.515	8.125	7.663	7.609	6.294	6.336	6.51	7.201	10.89	7.9	8.721
FAM76A	FAM76A	199870	1	28052489	28089423	1p35.3	NM_152660.2	NP_689873.1	6.177	6.182	6.708	7.086	6.95	7.138	7.016		6.537	7.13	6.357	7.16	7.635	6.831	6.959	7.093	6.931	6.545	6.759	6.448	6.487	7.187	6.796	6.984	6.554	6.628	7.442	6.599	6.85	6.602	7.321	6.679	6.431	6.25	5.952	6.406	6.442	6.325	5.557	6.4	6.354
STX12	STX12	23673	1	28099693	28150963	1p35.3	NM_177424.2	NP_803173.1	6.825	6.775	8.098	8.172	7.208	7.706	7.899	6.899	7.568	8.192	7.363	7.344	7.78	7.468	7.444	7.41	7.185	6.82	6.789	7.181	7.151	6.476	7.184	8.49	7.895	7.865	7.701	7.56	7.694	6.991	8.2	7.429	7.378	7.216	6.259	6.91	7.37	7.56	7.658	7.698	6.911
PPP1R8	PPP1R8	5511	1	28157251	28178183	1p35.3	NM_138558.2	NP_612568.1	7.953	7.849	8.014	8.639	8.014	8.614	8.362		8.293	8.411	8.661	8.757	8.535	8.652	8.411	8.357	8.302	8.394	8.419	8.615	8.833	8.47	8.707	9.119	8.563	8.478	8.771	8.574	8.528	8.014	8.836	8.44	8.352	8.218	7.554	7.606	8.125	7.713	7.36	8.386	8.159
SCARNA1	SCARNA1	677774	1	28160911	28161077	1p35.3			4.892		5.121	5.017	4.978	5.234	4.679		4.734	5.158	4.951	4.768	5.144	5.496	5.263	5.137	5.26	5.459	4.914	5.385	5.407	5.895	5.758	6.28	5.144	5.711	5.777	4.733	5.221	4.617	5.371	5.103	5.399	4.622	4.487		4.86	4.788	4.518	5.132	4.46
THEMIS2	THEMIS2	9473	1	28199053	28213196	1p35.3	NM_004848.2	NP_001034566.1	4.527	4.762	4.962	4.831		4.969			4.432	4.669			4.744	5.491	4.627				4.932	6.789	5.626	4.496	6.774	5.945	4.925	6.91	5.14	4.92	5.655	5.467	7.176	4.801	4.699	4.825			5.026	4.957	4.884	5.195
RPA2	RPA2	6118	1	28218035	28241308	1p35	NM_002946.3	NP_002937.1	6.801	7.118	6.793	7.419	6.743	7.931	7.418	6.989	7.541	7.468	7.869	7.781	7.721	7.8	7.329	7.425	7.528	7.327	7.504	7.707	8.335	7.772	7.141	8.816	7.154	7.427	7.766	7.922	7.536	6.973	7.905	6.926	7.545	7.331	6.741	6.406	7.205	6.972	6.287	7.9	6.936
SMPDL3B	SMPDL3B	27293	1	28261465	28285668	1p35.3	NM_014474.2	NP_055289.2	6.499	4.695	4.646	4.628	6.954	4.619	4.717		4.685	4.591	5.121	6.041	6.649	6.533	7.335	6.702	6.022	5.693	4.808	5.382	4.747	4.602	7.159	5.53	4.594	4.892	4.632	4.635	4.744	5.384	4.634	4.619	4.694	5.131	5.102	5.653	4.655	4.761	4.727	5.834	4.931
XKR8	XKR8	55113	1	28285972	28294607	1p35.3	NM_018053.2	NP_060523.2	6.764	7.35	6.511	6.519	6.599	7.303	6.541	6.682	6.978	7.76	7.347	7.108	7.032	7.259	7.126	6.957	6.859	6.794	6.862	6.63	6.689	6.892	6.901	7.798	7.618	7.381	5.857	7.012	7.503	6.533	6.673	6.407	5.968	5.829	6.757	6.488	6.977	7.503	6.818	6.999	7.046
EYA3	EYA3	2140	1	28296854	28415148	1p36	NM_001990.3	NP_001981.2	7.028	6.206	7.193	7.434	6.56	7.633	7.591	6.062	7.225	7.459	7.239	7.834	7.549	7.761	7.774	7.127	7.305	7.452	7.71	8.18	7.936	7.397	8.134	7.794	7.794	8.084	7.682	7.879	7.895	7.703	8.543	7.502	8.07	7.764	6.082	6.407	7.537	6.679	6.169	7.275	6.585
PTAFR	PTAFR	5724	1	28473676	28520447	1p35-p34.3	NM_001164721.1	NP_000943.1												5.613																						4.818							5.796
DNAJC8	DNAJC8	22826	1	28526789	28559542	1p35.3	NM_014280.2	NP_055095.2	8.348	8.033	8.468	9.205	8.499	9.244	9.016	7.379	8.96	8.836	9.163	8.951	8.845	9.142	9.118	8.577	8.653	8.609	8.894	9.051	9.011	8.753	8.933	9.195	9.254	8.906	9.055	8.797	8.962	8.683	9.352	8.926	8.454	8.221	7.796	8.045	8.86	8.321	8.278	8.716	8.082
ATPIF1	ATPIF1	93974	1	28562601	28564616	1p35.3	NM_178191.2	NP_835497.1	8.503	8.459	8.271	9.027	9.576	9.197	9.086	9.676	8.765	8.898	9.127	10.012	9.822	9.252	9.747	9.448	10.025	9.316	9.557	8.94	10.011	8.914	9.627	8.758	8.439	8.357	9.077	8.309	9.069	7.328	9.175	8.755	8.212	8.081	8.39	8.77	8.512	8.695	8.249	8.691	9.182
SESN2	SESN2	83667	1	28585962	28609002	1p35.3	NM_031459.4	NP_113647.1	6.042	6.33	7.084	6.705	6.585	6.381	6.589		5.817	6.354	6.464	6.2	6.137	6.624	6.388	6.42	7.797	7.04	5.915	5.906	7.539	5.978	6.275	7.111	7.741	6.558	5.663	5.764	5.642	7.06	6.47	6.795	5.501	5.585	5.646	5.762	6.398	6.488	7.939	6.763	6.136
PHACTR4	PHACTR4	65979	1	28696092	28826881	1p35.3	NM_023923.3	NP_076412.3	7.242	7.091	7.393	8.52	7.672	8.116	7.923	7.574	7.948	7.807	8.19	8.035	8.147	8.039	8.39	8.115	7.976	8.146	7.561	6.764	7.519	7.752	8.146	8.214	8.098	7.235	8.163	7.873	7.82	7.795	7.853	7.237	7.655	7.519	7.536	7.472	7.428	7.413	7.522	8.091	7.709
RCC1	RCC1	1104	1	28832454	28865708	1p36.1	NM_001048199.2	NP_001041660.1	8.673	8.264	8.292	8.992	7.828	8.75	8.536	6.948	8.451	8.307	8.839	8.912	9.276	9.161	9.563	9.281	9.276	9.032	8.895	9.2	9.133	9.024	8.849	8.598	9.025	7.449	8.674	8.539	8.411	8.322	8.952	8.701	8.811	8.882	8.444	7.83	8.388	7.641	7.601	8.588	9.056
PRDX3P2	PRDX3P2	100128092	1	28852827	28853739	1p35.3			8.193	8.772	7.687	7.852	7.553	8.355	8.115		8.244	6.834	7.881	8.705	8.76	9.154	8.705	8.409	8.753	8.762	7.11	8.668	7.835	8.046	8.06	8.565	8.563	8.988	8.185	8.658	8.199	8.155	8.14	7.985	8.817	8.854	8.203	8.482	7.862	7.748	7.755	8.316	8.485
TRNAU1AP	TRNAU1AP	54952	1	28879528	28905057	1p35.3	NM_017846.4	NP_060316.1	6.621	6.975	7.064	7.523	7.316	7.727	6.856	5.994	7.529	7.525	7.632	7.168	7.042	7.22	7.047	7.65	6.875	6.999	7.186	6.643	7.584	7.28	6.824	7.324	7.846	6.716	7.674	7.096	7.197	6.782	7.828	7.173	6.896	6.972	6.361	6.788	7.483	6.485	6.542	7.502	7.81
RAB42	RAB42	115273	1	28918711	28921088	1p35.3	NM_001193532.1	NP_689517.1											4.865																									4.688	4.421	4.478
TAF12	TAF12	6883	1	28929608	28969604	1p35.3	NM_005644.3	NP_001128690.1	6.86	5.207	6.887	7.493	6.785	7.611	7.893	6.828	7.043	7.606	7.417	7.487	7.808	7.91	7.116	7.406	7.334	7.233	6.698	6.835	7.414	7.093	7.023	7.221	7.262	7.102	6.868	7.151	6.786	6.516	7.457	6.782	6.628	6.493	6.438	6.791	7.71	6.296	6.31	7.802	6.577
RNU11	RNU11	26824	1	28975111	28975246	1p35			7.27	7.33	7.911	8.199	6.762	8.02	7.563		7.681	8.105	7.756	6.721	8.19	7.611	8.036	7.208	7.535	7.264	8.482	7.91	8.44	8.389	8.994	9.56	7.611	8.182	8.318	8.093	7.91	8.091	8.646	7.706	7.799	7.628	6.818	7.206	7.279	7.43	6.787	7.076	6.318
GMEB1	GMEB1	10691	1	28995239	29042115	1p35.3	NM_024482.2	NP_006573.2	6.77	6.564	6.104	7.438	6.177	7.274	6.78	5.968	6.984	6.925	6.937	7.143	7.176	7.143	7.311	6.738	6.606	6.644	7.102	7.558	6.706	6.824	7.183	6.916	7.282	6.278	6.988	6.45	6.398	6.171	7.165	6.219	6.538	6.467	6.152	6.413	6.716	5.754	6.161	6.989	6.649
YTHDF2	YTHDF2	51441	1	29063132	29096287	1p35	NM_001173128.1	NP_057342.2	8.335	8.298	8.184	9.268	8.458	9.089	8.742	9.045	8.583	8.739	9.167	8.912	9.154	9.213	9.243	8.775	8.485	8.653	9.018	8.972	9.202	9.173	9.159	9.418	8.956	9.218	9.415	9.389	9.521	8.959	9.544	9.289	8.77	8.559	8.155	8.307	8.615	7.872	7.901	8.786	8.409
OPRD1	OPRD1	4985	1	29138653	29190208	1p36.1-p34.3	NM_000911.3	NP_000902.3	4.975	4.972	4.954	5.039	5.104	4.767	5.444		5.006	7.384	5.191	4.978	5.148	4.845	4.674	4.99	5.111	6.015	4.995	5.059	5.1	5.029	5.415	4.942	5.454	6.932	5.176	7.448	6.093	5.081	5.219	5.605	4.899	4.849	5.411	4.903	5.073	4.963	5.309	5.258	5.079
EPB41	EPB41	2035	1	29213602	29446558	1p33-p32	NM_203343.2	NP_004428.1	7.29	6.149	5.279		6.452	7.33	6.622	4.483	7.001	6.702	7.208	7.793	8.051	7.773	8.023	7.561	7.635	8.616	8.255	7.917	9.141	8.275	8.985	6.621	5.841	7.487	7.229	7.156	7.555	7.1	8.087	6.084	7.255	7.181	6.135	6.399	6.671	6.494	6.321	6.181	6.55
TMEM200B	TMEM200B	399474	1	29445936	29450421	1p35	NM_001171868.1	NP_001003682.1	4.573	7.386	6.933	4.649	4.554	4.609	4.535	4.829	5.414	6.366	5.582	4.53	4.546	6.441	5.549	4.588	4.637	4.729	4.766	4.655	5.031	4.716	4.859		5.336	6.582	5.95	4.536	4.555	4.677	4.791	4.558	4.745	4.627	4.512	4.911	5.574	6.128	6.028	5.6	4.512
SRSF4	SRSF4	6429	1	29474249	29508637	1p35.3	NM_005626.4	NP_005617.2	8.851	9.252	9.688	9.826	8.821	10.116	9.825	8.999	10.138	9.948	10.048	9.623	9.976	9.736	10.205	9.635	9.496	9.341	10.115	9.611	9.986	9.937	9.58	10.129	9.383	9.177	9.969	8.947	9.47	8.86	9.913	9.214	9.31	8.993	8.823	9.052	9.819	8.911	9.278	9.466	9.006
MECR	MECR	51102	1	29519168	29557470	1p35.3	NM_016011.2	NP_057095.2	7.764	6.961	7.497	7.887	7.202	7.749	7.66		7.637	7.803	7.361	7.999	8.471	8.134	7.794	8.097	8.118	8.058	7.614	8.253	7.748	7.717	8.224	8.49	8.149	7.928	8.113	7.684	7.844	8.095	8.365	7.854	7.617	7.549	7.305	7.117	7.897	7.619	7.105	8.159	7.668
PTPRU	PTPRU	10076	1	29563027	29653325	1p35.3	NM_001195001.1	NP_005695.3	6.661	5.688	5.714	5.367	6.881	5.404	6.182		6.256	7.643	6.228	5.526	6.29	7.315	8.037	6.192	5.837	5.881	5.88	5.525	5.529	5.879	5.879	6.251	6.237	7.662	6.67	6.499	6.43	6.233	8.422	6.019	5.405	5.557	6.557	7.437	5.546	5.395	5.857	5.587	7.654
MATN1	MATN1	4146	1	31184123	31196432	1p35	NM_002379.3	NP_002370.1	5.747	6.073	6.099	5.796	5.599	5.678	5.922		6.267	5.731	6.355	5.769	5.564	5.646	5.493	5.775	6.039	5.845	5.927	6.004	6.139	6.037	5.973	5.557	5.933	5.775	5.501	5.798	5.783	5.615	5.765	5.806	5.794	5.666	6.085	5.563	6.039	6.113	6.044	5.8	5.596
MATN1-AS1	MATN1-AS1	100129196	1	31191618	31199593	1p35.2			5.673	5.219	5.331	5.715	5.651	4.707	5.667		5.563	5.468	5.549	5.429	6.104	5.127	5.594	5.752	5.426	5.936	5.062	5.581	6.251	4.942	5.158	5.025	5.073	5.899	6.246	5.932	5.479	5.535	6.003	5.637	5.364	5.415	5.473	5.5	5.469	5.569	5.311	5.929	5.747
LAPTM5	LAPTM5	7805	1	31205314	31230683	1p34	NM_006762.2	NP_006753.1		6.715					5.401		5.222	5.478	4.746	4.722				4.955		5.928	10.403	11.132	7.605	9.116	10.29	7.19	4.518	8.109		7.149	4.541								9.145	7.633		4.6	4.506
SDC3	SDC3	9672	1	31342312	31381480	1pter-p22.3	NM_014654.3	NP_055469.3	6.113	6.802	7.175	6.725	5.945	7.039	7.22		7.232	8.283	7.149	6.301	7.079	7.246	6.521	5.839	6.049	7.43	5.406	5.405	6.852	5.455	5.666	5.647	7.075	9.419	9.746	8.456	9.751	7.885	9.065	8.809	8.172	8.443	6.199	6.541	7.21	8.261	6.449	7.443	5.886
PUM1	PUM1	9698	1	31404352	31538564	1p35.2	NM_014676.2	NP_055491.1	8.801	8.794	8.959	9.561	9.011	9.345	9.012	8.661	9.128	9.483	9.381	9.255	9.66	9.543	9.87	9.638	9.718	9.637	9.292	9.19	9.291	9.484	9.458	9.528	9.265	9.185	9.366	9.029	9.239	8.895	9.544	9.214	8.746	8.456	8.714	8.97	9.235	8.942	9.033	9.56	9.317
NKAIN1	NKAIN1	79570	1	31652591	31712734	1p35.2	NM_024522.2	NP_078798.2	4.798		4.457	4.563	5.987				4.482	4.467	4.504	4.467		4.642	4.466		4.533	5.703	4.472	4.634	4.522	4.641	4.518			4.437	4.466		4.46	4.945	4.473	4.944		4.659	4.724	4.559		4.501		5.268	4.438
SNRNP40	SNRNP40	9410	1	31732414	31769644	1p35.2	NM_004814.2	NP_004805.2	8.447	8.874	8.951	9.253	8.466	9.616	9.284	7.931	9.318	9.155	9.709	9.429	9.455	9.739	9.519	9.391	9.612	9.152	9.526	9.493	9.837	9.475	9.004	9.397	9.778	8.879	9.432	8.441	9.098	8.531	9.449	9.106	8.739	8.555	8.61	8.515	9.666	8.61	8.625	9.743	8.906
ZCCHC17	ZCCHC17	51538	1	31769828	31837800	1p35.2	NM_016505.2	NP_057589.2	6.202	6.655	6.943	7.013	6.65	7.541	7.594	6.959	7.436	7.887	7.638	7.266	7.017	6.985	6.875	7.148	6.821	6.953	6.943	7.018	7.379	6.986	7.001	6.833	7.436	8.493	8.915	8.415	8.446	6.35	8.148	8.39	8.065	7.887	5.933	6.366	7.221	6.575	6.289	6.98	6.685
FABP3	FABP3	2170	1	31838099	31845923	1p33-p32	NM_004102.3	NP_004093.1				4.669																						5.806	4.479				4.67			4.656			4.913
SERINC2	SERINC2	347735	1	31882411	31907527	1p35.1	NM_001199038.1	NP_001185966.1	7.435	9.431	7.051	6.372	10.371	7.829	8.485	5.174	6.99	7.117	7.489	8.099	9.347	9.453	8.432	10.495	9.627	8.004	6.83	6.545	6.569	6.708	7.988	6.714	6.346	8.512	7.159	6.392	6.982	7.68	7.813	7.818	6.423	6.569	7.485	8.734	10.627	6.878	7.526	7.052	9.486
LINC01225	LINC01225	149086	1	31971838	31974167	1p35.2			5.831	5.686	5.967	5.917	5.538	5.401	5.727		6.016	5.759	6.213	5.927	5.781	5.597	5.657	5.84	5.737	6.723	7.715	6.052	6.021	7.313	5.957	5.469	5.734	5.498	5.772	5.656	5.771	5.696	5.78	5.687	5.735	5.935	5.943	5.796	6.053	5.959	5.961	5.744	5.948
LINC01226	LINC01226	284551	1	31984035	31989846	1p35.2														4.577						5.196	6.903			5.846
TINAGL1	TINAGL1	64129	1	32042085	32053287	1p35.2	NM_001204415.1	NP_001191343.1	5.666	7.879	5.68	5.736	6.587	5.827	5.622		7.344	5.581	7.902	8.467	7.614	7.562	6.626	9.468	9.362	7.91	6.023	5.681	5.739	5.784	5.807	5.498	5.736	6.043	5.646	6.417	5.736	6.039	5.685	5.801	5.586	5.83	5.932	7.01	8.815	7.531	7.802	5.777	7.774
HCRTR1	HCRTR1	3061	1	32083300	32092919	1p33	NM_001525.2	NP_001516.2	5.343	5.051	5.017	5.332	4.735	5.057	5.307		4.889		4.904	4.94	5.06	5.117	4.852	4.811	5.157	4.995	4.86	5.124	5.192	5.348	4.951	5.064	4.82	4.597	4.797	4.582	5.034	4.706	4.832	5.146	5.156	5.268	4.867	4.615	5.058	5.063	4.942	4.737	4.837
MEMO1	MEMO1	7795	1	32092878	32236121	1p36.1-p35			6.013	5.834	5.602	5.181	5.263	5.897	5.021		5.7	5.663	4.612	5.03	6.014	6.149	6.541	5.798	5.199	6.11	6.162	6.312	5.227	5.958	5.921	6.01	5.891	6.707	6.242	5.705	5.974	6.061	6.702	5.889	6.011	5.832	5.68	5.541	5.615	6.044	5.735	6.515	5.939
PEF1	PEF1	553115	1	32095462	32110838	1p34	NM_012392.3	NP_036524.1	7.986	8.001	8.525	8.54	8.166	8.968	8.967	7.574	8.553	8.77	8.857	8.752	8.571	8.437	8.651	8.534	8.971	8.44	8.456	8.39	8.583	8.419	8.538	8.428	8.522	8.566	8.885	8.879	8.511	7.964	8.641	8.498	8.43	8.283	8.149	8.103	9.108	7.976	7.976	8.352	8.226
COL16A1	COL16A1	1307	1	32117847	32169768	1p35-p34	NM_001856.3	NP_001847.3	5.575	5.644	8.037	5.97	5.566	5.749	5.703	8.175	5.626	6.724	5.88	5.482	5.595	5.45	5.488	7.164	5.669	5.797	5.626	5.612	5.627	5.485	5.648	6.602	5.653	6.159	5.714	7.195	5.711	5.591	6.636	6.767	6.626	6.452	5.63	7.165	6.435	5.898	5.826	5.511	5.577
ADGRB2	ADGRB2	576	1	32192705	32229664	1p35	NM_001703.2	NP_001694.2	6.527	6.227	6.871	7.155	8.126	6.987	7.34	5.509	7.166	8.103	7.159	5.906	5.941	6.967	6.129	6.07	6.147	6.991	6.495	5.958	6.048	7.336	6.261	5.935	6.768	7.168	6.461	5.877	6.989	7.113	7.228	6.765	5.747	6.199	6.928	8.057	7.26	6.479	6.807	7.392	6.168
SPOCD1	SPOCD1	90853	1	32256022	32281652	1p35.2	NM_144569.4	NP_653170.3	5.778	6.321	8.201	5.822	7.069	5.973	8.179	5.126	5.834	8.687	6.333	5.479	5.549	5.715	5.627	5.556	5.616	5.592	5.727	5.558	5.655	5.805	5.568	5.467	8.787	6.021	6.299	5.482	5.702	5.64	5.817	6.074	5.881	5.928	5.575	5.799	7.465	7.351	6.155	5.954	5.632
PTP4A2	PTP4A2	8073	1	32372021	32403988	1p35	NM_001195100.1	NP_001182030.1	9.129	10.056	10.322	10.686	11.064	10.493	10.465	10.595	10.117	10.717	10.37	10.396	9.668	10.396	9.848	10.357	10.173	10.162	11.128	10.103	10.838	11.242	10.41	9.97	10.811	10.324	9.824	10.05	9.967	9.563	10.193	9.604	9.358	8.756	9.876	10.052	10.769	10.706	9.586	10.921	9.223
KHDRBS1	KHDRBS1	10657	1	32479294	32526460	1p32	NM_006559.2	NP_006550.1	9.579	9.78	9.341	10.033	9.694	10.462	10.143	9.958	9.918	9.679	10.157	9.958	10.1	10.125	10.017	10.062	10.01	10.355	10.339	10.349	10.147	10.389	10.102	10.214	10.248	9.474	9.81	9.689	9.884	9.68	9.597	9.74	9.517	9.336	9.654	9.495	9.958	9.512	9.211	10.191	9.745
TMEM39B	TMEM39B	55116	1	32538502	32568467	1p35.1	NM_018056.2	NP_060526.2	6.955	6.904	7.24	7.956	6.849	7.581	7.56	6.814	7.121	7.917	7.469	7.601	6.586	7.323	7.186	7.601	7.135	7.478	7.848	7.024	7.151	7.772	7.765	7.735	8.037	7.083	7.853	7.07	7.372	6.805	7.553	7.403	7.702	7.392	6.316	6.272	8.046	6.679	6.772	7.745	7.127
KPNA6	KPNA6	23633	1	32573643	32642168	1p35.1	NM_012316.4	NP_036448.1	8.518	8.764	9.079	9.446	8.385	9.566	9.385	8.402	9.394	9.355	9.373	8.672	9.356	9.258	9.4	8.924	8.857	8.685	8.809	8.692	8.649	8.594	8.887	9.109	9.332	8.996	9.306	9.336	9.195	8.576	9.46	9.419	8.726	8.454	8.502	8.682	9.366	8.948	8.635	9.288	8.97
TXLNA	TXLNA	200081	1	32645344	32663886	1p35.1	NM_175852.3	NP_787048.1	7.793	8.645	8.831	9.51	8.473	9.54	9.117	7.528	9.278	9.463	9.471	8.753	8.77	8.183	8.816	8.849	8.425	8.422	8.539	8.465	8.608	8.61	8.654	9.496	9.098	9.071	9.503	9.075	9.361	8.409	9.753	9.05	8.996	8.836	8.207	8.491	8.973	8.677	8.477	9.004	8.357
CCDC28B	CCDC28B	79140	1	32665986	32670991	1p36.11-p34.2	NM_024296.3	NP_077272.2			5.136	5.185		4.51	5.514	5.534	4.645	5.424						4.632	4.904		6.08		6.276	5.815	5.014	5.474	5.075	4.734	4.711	4.626		4.434	5.577	4.499	4.889	4.694		4.767	5.306	4.639		4.509
IQCC	IQCC	55721	1	32671235	32674288	1p36.11-p34.2	NM_001160042.1	NP_060604.2	5.867	5.5	5.691	5.755	6.046	6.081	6.038		5.87	5.786	5.237	6.062	5.715	5.576	6.331	6.08	5.779	5.752	5.682	5.495	6.23	6.001	5.621	6.287	5.789	5.508	6.147	5.96	5.714	5.527	6.502	5.741	5.152	5.462	4.933	5.55	5.941	5.073	5.031	5.762	5.614
DCDC2B	DCDC2B	149069	1	32674694	32681797	1p35.1	NM_001099434.1	NP_001092904.1	6.153	6.493	5.996	6.3	5.947	5.818	5.628		6.079	5.874	6.555	5.99	5.522	5.781	5.843	5.96	6.006	6.135	6.334	6.423	6.431	6.329	6.426	5.588	5.58	5.762	6.023	5.914	6.232	5.794	5.916	6.199	5.694	6.321	6.457	5.798	6.231	6.379	6.315	6.167	6.226
TMEM234	TMEM234	56063	1	32680077	32687972	1p36.11-p34.2	NM_019118.3	NP_061991.3	6.073	6.095	6.239	6.386	6.959	6.701	5.961		6.725	6.848	6.746	5.848	6.653	6.262	6.868	7.092	6.896	6.956	6.238	6.058	5.924	6.276	6.038	6.179	6.174	6.283	6.844	6.854	6.505	6.268	7.166	6.653	6.346	6.224	5.986	6.493	6.401	6.445	5.929	6.429	6.702
EIF3I	EIF3I	8668	1	32687970	32697205	1p34.1	NM_003757.2	NP_003748.1	9.481	9.685	9.949	9.86	9.557	10.191	10.69	9.02	10.311	10.109	10.523	10.581	10.248	10.47	10.118	10.143	10.362	10.278	9.581	10.139	10.711	9.958	10.366	10.235	10.525	9.836	9.985	10.897	10.28	10.226	10.55	10.877	10.385	10.162	9.622	9.498	10.5	9.903	9.477	9.922	9.792
MTMR9LP	MTMR9LP	339483	1	32697260	32707311	1p35.1			6.126	6.145	6.332	6.258	6.207	6.142	6.29		6.231	6.345	6.217	6.034	5.981	6.391	6.369	6.199	6.38	6.502	6.203	6.146	6.231	6.137	6.216	5.942	5.923	7.601	8.315	6.509	8.02	6.229	7.736	6.155	6.162	6.992	6.249	6.384	6.33	6.254	6.021	6.368	6.238
FAM167B	FAM167B	84734	1	32712817	32714461	1p35.1	NM_032648.2	NP_116037.2				4.548			4.432		4.47	4.53			4.47			4.453	4.472	4.474	4.497	4.527		4.568	4.53			5.895	9.431	6.643	7.806	5.448	7.932	7.43	5.576	6.635			4.423		4.601	4.787
LCK	LCK	3932	1	32716839	32751768	1p34.3	NM_001042771.1	NP_001036236.1	5.076	4.958	4.945	5.007	4.992	4.847	5.071		5.029	4.908	5.055	10.479	5.116	4.933	4.937	5.017	7.904	8.958	9.859	4.986	4.992	9.797	5.027	4.886	4.87	4.734	4.835	4.877	4.911	4.884	4.811	4.869	4.86	5.275	4.961	4.854	5.044	4.856	4.932	5.257	5.034
HDAC1	HDAC1	3065	1	32757707	32799224	1p34	NM_004964.2	NP_004955.2	8.922	8.083	8.468	8.499	8.728	8.818	8.795	9.295	9.213	8.815	9.565	9.92	9.619	9.677	9.549	9.704	10.01	9.406	9.391	9.25	9.217	9.531	8.476	9.181	9.098	8.517	9.542	8.745	9.121	8.36	8.925	8.957	8.706	8.525	8.274	7.989	9.084	8.752	7.628	9.067	8.736
MARCKSL1	MARCKSL1	65108	1	32799429	32801840	1p35.1	NM_023009.6	NP_075385.1	9.568	7.646	8.885	10.151	8.872	9.413	8.584	8.609	9.097	9.573	10.049	10.925	10.197	9.865	8.794	10.929	10.923	10.832	9.997	6.947	10.324	10.429	8.007	7.705	8.798	10.929	11.115	9.866	10.583	9.729	10.878	10.785	10.67	10.788	8.896	9.082	9.424	7.959	7.203	9.063	6.071
FAM229A	FAM229A	100128071	1	32826870	32827844	1p35.1	NM_001167676.1	NP_001161148.1	5.633	5.526	5.215	5.441	5.245	5.319	5.43		5.639	5.169	5.658	5.81	5.667	4.733	4.759	5.143	5.559	4.488	5.285	5.717	5.607	5.747	5.208	4.774	5.947	5.294	4.82	5.422	5.64	5.534	5.152	5.106	4.926	5.173	5.355	5.256	5.53	5.083	5.44	5.198	4.838
TSSK3	TSSK3	81629	1	32827861	32829924	1p35-p34	NM_052841.3	NP_443073.1	5.542	5.275	5.629	5.624	5.923	6.158	5.548		5.873	5.973	5.6	5.197	5.812	5.655	6.093	5.722	5.328	5.676	5.752	5.2	5.798	5.578	5.442	5.588	5.489	6.21	6.904	6.147	6.256	6.011	6.991	6.604	6.519	6.431	5.476	5.827	5.468	5.584	5.905	5.956	5.685
BSDC1	BSDC1	55108	1	32830233	32860062	1p35.1	NM_001143890.1	NP_001137361.1	7.355	7.374	7.998	7.988	8.172	8.414	8.277	7.315	8.099	8.506	8.172	8.306	7.969	8.228	8.227	8.19	7.977	7.756	7.455	7.298	8.588	7.608	7.962	8.403	8.079	7.908	8.602	7.754	8.222	7.4	8.184	7.793	7.68	7.528	7.005	7.044	7.731	7.763	9.044	7.961	7.456
GAPDHP20	GAPDHP20	343338	1	32867500	32868783	1p35.1															4.485							4.578						4.571								4.481
ZBTB8B	ZBTB8B	728116	1	32930657	32953459	1p35.1	NM_001145720.1	NP_001139192.1	4.543					5.312	4.574		4.636					5.348												4.47	4.531		4.972	5.326	6.508									5.118
ZBTB8A	ZBTB8A	653121	1	33004745	33071551	1p35.1	NM_001040441.1	NP_001035531.1	6.125	5.924	6.411	6.41	6.244	6.86	6.103	8.264	6.175	6.687	5.63	5.754	5.973	6.689	6.774	5.459	6.064	5.896	5.834	4.644		5.807	5.554	4.627	6.266	6.619	6.289	4.984	6.202	5.509	6.207	5.626	4.829	4.677	5.229	5.831	5.886	5.242	6.165	5.952	5.679
ZBTB8OS	ZBTB8OS	339487	1	33086816	33116191	1p35.1	NM_178547.2	NP_848642.1	5.625	5.528	6.069	6.411	5.802	6.719	6.075		6.205	6.209	6.453	6.844	5.986	6.464	5.973	6.174	5.88	5.725	5.714	5.701	6.098	5.379	6.99	6.168	6.657	6.312	6.819	6.768	6.673	5.491	7.11	6.269	6.403	6.393	5.247	5.939	5.783	5.634	6.737	6.478	6.404
RBBP4	RBBP4	5928	1	33116748	33151812	1p35.1	NM_001135255.1	NP_001128727.1	7.87	7.459	7.705	8.882	7.607	8.399	8.108	7.47	8.322	8.202	8.878	8.838	8.255	8.725	8.213	8.492	8.653	8.886	9.632	8.782	8.938	9.517	9.29	8.316	8.16	7.651	8.417	7.672	8.002	6.947	8.728	7.23	7.738	7.819	7.825	7.814	8.549	8.004	8.167	8.679	7.22
SYNC	SYNC	81493	1	33145506	33168361	1p35.1	NM_001161708.1	NP_110413.2	4.51	4.965	8.487	7.622	5.449	7.41	7.315	7.867	6.821	8.166	5.884	4.684	4.744	4.585		4.564		4.474	4.617		4.654		4.696		4.92	5.494	5.841	4.923	4.75	4.928	5.604	4.435			5.151	5.706	5.237	4.937	8.409	4.774
KIAA1522	KIAA1522	57648	1	33207511	33240571	1p35.1	NM_001198973.1	NP_065939.2	7.8	6.345	7.046	7.195	8.495	6.431	6.483	6.382	7.176	7.033	7.472	7.982	8.429	7.328	7.685	8.852	7.829	7.089	5.598	5.544	6.898	5.496	6.601	5.266	5.414	6.565	6.815	6.091	6.608	6.867	7.071	5.92	5.967	6.144	7.073	7.374	6.788	6.589	8.016	6.505	8.177
YARS	YARS	8565	1	33240839	33283633	1p35.1	NM_003680.3	NP_003671.1	8.064	9.225	9.853	9.727	8.228	9.421	9.287	8.974	8.783	9.017	9.316	9.735	9.147	9.749	9.437	9.491	9.528	9.947	9.46	9.494	9.838	9.156	9.359	9.51	9.558	8.157	9.188	9.03	9.016	9.258	9.448	9.682	9.034	9.001	8.782	8.547	9.274	8.517	9.963	9.261	8.892
S100PBP	S100PBP	64766	1	33283042	33324480	1p35.1	NM_022753.3	NP_001243050.1	6.934	6.585	7.124	7.519	6.94	7.204	7.347	8.422	7.033	7.715	7.204	7.012	7.119	7.387	7.475	7.129	6.958	6.971	8.089	7.528	7.71	7.891	8.086	7.934	7.135	7.05	7.673	7.425	7.35	6.739	7.843	6.823	7.197	7.232	6.718	6.725	7.475	6.864	7.562	7.857	6.814
FNDC5	FNDC5	252995	1	33327868	33338093	1p35.1	NM_001171941.2	NP_715637.2	4.44		6.441	4.616		4.478				4.537					4.444																			4.763		5.144
TMEM54	TMEM54	113452	1	33360195	33366953	1p35-p34	NM_033504.2	NP_277039.1	8.538	7.931	7.838	6.356	8.408	8.24	7.719	5.988	7.59	7.248	6.708	9.776	10.016	8.294	8.799	10.022	9.012	6.975	5.52	5.433	6.392	5.517	5.581	7.643	7.772	8.258	7.073	7.559	7.245	7.723	8.615	6.462	5.7	5.771	7.25	7.775	8.529	8.094	7.505	7.772	8.702
RNF19B	RNF19B	127544	1	33402046	33430414	1p35.1	NM_153341.2	NP_001120833.1	6.371	6.914	7.273	7.517	6.802	7.428	7.536	5.032	7.69	6.955	7.746	7.949	8.049	7.449	7.611	8.753	8.956	6.813	6.5	6.177	7.045	6.584	6.901	7.246	7.461	8.359	8.053	7.896	8.449	8.256	9.171	7.803	7.556	7.435	6.824	7.488	7.684	7.458	8.887	7.598	7.609
AK2	AK2	204	1	33473540	33502512	1p34	NM_001199199.1	NP_001186128.1	9.028	9.067	9.325	9.764	9.48	9.69	9.461	9.324	9.454	9.54	9.375	10.452	10.106	9.739	10.211	10.196	9.942	10.201	9.612	10.454	10.205	9.156	10.161	9.765	9.94	9.319	10.4	9.694	10.146	9.702	10.606	10.117	10.043	9.778	8.996	9.042	9.757	9.29	9.799	9.722	9.189
AZIN2	AZIN2	113451	1	33546713	33586132	1p35.1	NM_052998.2	NP_443724.1	5.304	6.329	5.859	6.013	5.437	5.675	6.235		5.823	6.017	6.384	5.028	5.518	6.59	5.848	5.501	5.48	5.865	5.85	5.121	5.242	5.295	5.17	6.301	6.224	5.963	6.503	6.693	6.127	6.183	7.921	6.557	6.311	5.981	5.576	5.742	6.788	6.781	6.365	5.352	5.406
TRIM62	TRIM62	55223	1	33611002	33647671	1p35.1	NM_018207.2	NP_060677.2	5.823	5.215	5.866	5.873	5.627	5.333	5.847		5.401	5.728	5.978	5.445	5.437	5.637	5.65	5.236	5.457	5.169	5.344	4.851	4.892	5.339	5.272	5.174	5.814	7.169	5.713	6.283	6.517	5.495	7.537	5.94	5.64	5.934	4.957	5.034	5.543	5.414	5.756	5.286	5.85
ZNF362	ZNF362	149076	1	33722173	33766320	1p35.1	NM_152493.2	NP_689706.2	7.569	6.298	7.189	6.816	6.509	7.446	6.844	6.691	6.772	7.861	7.275	5.655	5.713	6.317	6.956	5.447	5.794	6.64	7.75	6.499	5.172	7.439	5.732	6.227	6.831	7.706	7.815	7.17	7.191	6.989	8.417	7.152	7.238	6.771	6.656	7.541	6.812	5.547	7.627	7.246	8.244
PHC2	PHC2	1912	1	33789223	33841194	1p34.3	NM_198040.2	NP_004418.2	6.28	7.335	7.237	7.373	6.596	7.548	7.443	6.972	7.419	8.25	7.525	7.747	7.145	8.482	6.885	7.592	8.029	7.611	6.729	6.755	6.798	6.981	6.58	6.797	8.35	7.737	8.277	7.848	7.922	6.799	8.383	8.554	7.654	7.678	6.486	6.957	7.766	8.342	7.677	6.827	6.71
MIR3605	MIR3605	100500853	1	33797993	33798093				5.694	7.423	7.113	7.475	6.49	7.772	6.833		7.457	8.352	7.197	6.612	6.98	8.054	6.948	8.089	7.788	7.549	6.397	6.434	6.126	6.457	6.277	6.389	6.923	7.295	8.158	7.673	7.223	6.675	8.505	7.705	6.691	6.872	6.148	6.731	7.36	7.803	7.394	6.026	6.812
TLR12P	TLR12P	100131451	1	33931849	33934575	1p35.1			4.484					4.615					4.484	4.68	4.6		4.624				4.447	4.472	4.462			4.494	4.944				4.595	4.607			4.789			4.533
ZSCAN20	ZSCAN20	7579	1	33938231	33961995	1p34.3	NM_145238.3	NP_660281.2	5.54	5.529	5.929	6.211	5.346	6.335	6.308		6.05	6.564	6.22	6.236	6.153	6.659	6.719	6	6.116	5.45	5.334	6.031	5.301	5.656	5.383	5.855	6.322	6.258	6.265	5.848	6.3	5.742	6.788	5.88	5.612	5.663	5.315	5.479	5.967	5.873	6.741	5.828	5.255
CSMD2	CSMD2	114784	1	33979598	34631443	1p34.3	NM_052896.3	NP_443128.2	5.157	5.176	5.239	5.18	5.294	5.439	6.627		6.33	5.064	5.677	5.419	5.162	5.002	5.082	5.153	5.266	5.107	5.19	5.249	5.293	5.177	5.153	8.02	5.12	4.938	5.023	5.076	5.148	5.03	5.053	5.142	5.005	5.144	5.21	5.051	5.183	5.191	7.863	5.101	5.102
HMGB4	HMGB4	127540	1	34326075	34330392	1p35.1	NM_145205.4	NP_660206.2	5.435	5.33	5.231	5.703	5.187	4.853	5.146		5.184	5.437	5.768	5.329	5.021	5.043	5.192	5.173	5.336	5.306	5.566	5.575	5.883	5.762	5.131	4.77	4.842	4.474	5.174	5.096	5.116	4.925	4.919	5.141	4.9	5.351	5.661	5.27	5.467	5.728	5.719	5.128	5.67
C1orf94	C1orf94	84970	1	34632483	34684731	1p34.3	NM_032884.3	NP_001128206.1							4.657																	7.122
GJB5	GJB5	2709	1	35220647	35224113	1p35.1	NM_005268.3	NP_005259.1																																									5.772
GJB4	GJB4	127534	1	35225341	35229325	1p34.3	NM_153212.2	NP_694944.1	5.154	5.31	5.475	5.43	5.084	5.24	5.568		5.344	5.142	5.33	7.194	5.435	5.723	5.061	5.243	6.54	5.383	5.446	5.537	5.674	5.538	5.345	5.008	5.027	5.068	5.02	5.241	5.431	5.544	5.295	5.17	5.448	5.337	5.53	5.246	5.399	5.248	5.203	5.417	5.907
GJB3	GJB3	2707	1	35246789	35251967	1p34	NM_001005752.1	NP_076872.1												6.646	4.955	5.435	4.817	5.691	6.397																								6.755
GJA4	GJA4	2701	1	35258598	35261348	1p35.1	NM_002060.2	NP_002051.2	6.868	6.939	6.821	6.503	6.899	6.237	6.953		6.889	6.64	6.918	6.943	6.885	6.606	6.693	6.678	7.182	6.875	7.059	7.014	7.211	7.111	6.938	6.648	7.017	6.532	6.458	6.211	6.902	7.175	6.576	6.919	6.527	6.753	7.069	6.589	6.751	7.03	6.8	6.387	6.894
SMIM12	SMIM12	113444	1	35315962	35325417	1p34.3	NM_001164824.1	NP_612437.3	7.409	7.774	7.538	7.996	7.598	7.831	8.209	6.693	7.973	8.009	8.162	8.226	8.277	7.718	8.095	7.819	7.866	7.784	7.47	8.419	8.894	7.704	8.559	9.172	8.502	7.893	8.247	8.223	8.379	8.284	8.988	8.709	8.136	8.113	7.602	7.673	8.068	7.73	8.6	7.82	7.597
DLGAP3	DLGAP3	58512	1	35331036	35395186	1p35.3-p34.1	NM_001080418.1	NP_001073887.1	6.155	5.758	5.681	5.962	5.645	5.326	5.701		5.74	5.163	6.028	5.943	5.578	5.431	5.706	5.643	5.899	5.663	5.762	6.013	5.97	5.919	5.966	5.34	5.619	5.281	5.439	5.455	5.636	6.16	5.509	5.752	5.665	5.339	5.844	5.658	5.858	5.852	5.768	6.386	5.858
LOC653160	LOC653160	653160	1	35441299	35444307	1p34.3			4.929	4.48				4.592	4.513		4.527	5.622	4.855		5.664	6.096	5.357	5.388	5.011	4.966	5.669		4.552	5.58		5.739	4.623	5.063	5.223	4.678			5.155						5.036	4.722	5.239	5.077
ZMYM6	ZMYM6	9204	1	35451766	35497569	1p34.2	NM_007167.3	NP_009098.3	6.76	6.702	6.998	7.235	6.857	7.641	7.27		7.259	7.37	6.86	7.232	7.58	7.392	7.403	6.999	7.418	6.899	7.136	7.603	7.412	7.458	7.178	7.711	7.355	7.629	7.825	7.069	7.197	7.049	7.9	7.382	6.546	6.484	6.071	6.758	7.143	7.189	7.366	7.419	6.772
ZMYM1	ZMYM1	79830	1	35525386	35581459	1p34.3	NM_024772.3	NP_079048.3	7.354	7.794	7.324	7.833	7.205	8.284	7.293	7.074	7.79	7.726	7.635	7.001	7.456	8.223	8.08	7.457	7.42	7.276	7.236	6.675	7.146	7.464	5.075	6.75	7.943	7.537	7.674	7.575	7.65	7.757	8.32	7.607	6.763	6.861	7.091	7.029	7.851	7.742	7.868	8.191	7.021
SFPQ	SFPQ	6421	1	35649200	35658743	1p34.3	NM_005066.2	NP_005057.1	6.964	7.047	7.125	7.74	7.087	8.131	6.792	7.985	7.656	8.071	7.918	5.712	6.997	7.892	8.201	7.751	6.787	7.942	8.453	7.789	7.125	8.277	6.883	8.161	6.519	7.124	8.26	7.322	7.487	6.816	7.92	6.968	6.933	6.733	6.712	6.751	7.428	7.264	7.795	7.611	7.141
ZMYM4	ZMYM4	9202	1	35734567	35887545	1p32-p34	NM_005095.2	NP_005086.2	8.144	7.911	8.793	8.609	7.939	8.956	8.667	8.116	8.567	8.535	8.538	8.12	8.623	8.934	8.825	8.519	8.316	8.382	8.608	8.74	9.105	8.714	8.343	8.636	8.751	8.692	8.515	8.486	8.347	8.405	8.98	8.631	7.859	7.716	7.952	8.515	8.471	8.371	9.345	9.219	8.519
RPL5P4	RPL5P4	643343	1	35816248	35817266	1p34.3			6.227	7.299	6.654	6.724	5.652	6.711	6.175		6.556	6.118	6.172	6.472	6.218	6.462	6.599	6.405	6.848	6.352	6.67	7.443	6.811	6.637	6.857	6.87	7.214	6.117	6.515	6.882	6.306	6.388	5.786	6.184	5.913	6.148	5.624	5.989	5.958	6.262	6.708	6.431	6.207
KIAA0319L	KIAA0319L	79932	1	35899090	36023037	1p34.2	NM_024874.4	NP_079150.3	7.674	7.43	7.266	7.294	8.326	7.813	7.835	7.841	7.828	8.25	7.737	8.344	7.928	7.779	7.706	8.175	7.832	7.802	7.067	7.232	7.302	6.8	7.463	7.844	7.772	8.473	7.983	8.592	8.136	7.868	8.779	7.719	7.887	7.492	7.032	7.759	7.972	8.343	8.63	7.923	7.948
NCDN	NCDN	23154	1	36023392	36032380	1p34.3	NM_001014841.1	NP_001014841.1	6.911	6.264	7.213	7.005	6.889	6.839	7.323		6.774	7.419	7.006	6.889	6.735	6.901	6.913	6.892	6.513	6.557	6.835	6.825	7.095	6.668	6.701	7.035	7.419	7.067	7.401	7.646	7.439	6.773	7.672	7.693	7.701	7.66	6.219	6.432	7.189	6.826	7.639	7.368	6.681
TFAP2E	TFAP2E	339488	1	36038970	36060927	1p34.3	NM_178548.3	NP_848643.2														4.551													6.013							5.814
PSMB2	PSMB2	5690	1	36065142	36107445	1p34.2	NM_001199779.1	NP_001186708.1	7.688	8.652	8.579	9.233	8.152	9.439	9.647	8.966	9.479	8.953	9.797	9.393	9.237	9.277	8.935	9.417	8.879	8.69	9.493	9.167	9.762	9.237	9.055	9.408	9.23	8.507	9.442	9.5	8.885	8.251	9.328	8.916	8.466	8.524	8.437	8.267	9.472	8.749	9.484	9.175	8.655
C1orf216	C1orf216	127703	1	36179476	36184790	1p34.3	NM_152374.1	NP_689587.1	5.351	5.355	5.952	5.897	5.28	6.534	6.604	6.634	6.233	6.64	6.353	5.522	5.44	5.985	6.502	5.903	5.366	5.606	5.833	6.091	6.048	5.518	5.47	6.253	6.482	6.48	7.052	6.894	7.023	6.167	7.338	6.313	6.126	5.886	5.545	5.643	6.392	5.824	7.092	5.995	4.924
CLSPN	CLSPN	63967	1	36197712	36235551	1p34.2	NM_001190481.1	NP_001177410.1	6.713	7.217	7.258	7.655	6.357	8.26	7.242		7.353	7.632	7.225	7.15	7.338	7.366	7.471	7.356	6.559	6.993	7.659	7.136	7.621	7.64	7.094	8.219	7.919	7.161	7.759	7.806	7.604	7.251	8.138	7.169	7.79	7.545	6.591	6.557	7.713	6.005	7.368	7.53	7.021
AGO4	AGO4	192670	1	36273827	36323490	1p34	NM_017629.3	NP_060099.2	5.408	5.576	5.93	6.376	5.698	6.723	5.359		5.824	6.4	5.709	6.21	5.957	6.009	6.512	6.578	6.117	6.21	6.742	6.853	5.485	6.518	5.256	6.372	6.692	6.842	7.243	6.29	6.649	6.447	7.262	6.018	6.123	6.068	5.102	6.027	5.741	6.328	6.431	5.747	5.383
AGO1	AGO1	26523	1	36335408	36389899	1p34.3	NM_012199.2	NP_036331.1	6.902	6.575	7.231	7.107	7.043	7.631	7.749	5.047	7.782	7.498	8.232	7.276	7.31	7.856	7.984	6.973	7.11	7.775	7.629	7.306	8.521	7.653	6.725	7.403	7.541	7.4	9.038	7.383	7.837	7.266	8.918	7.818	8.274	8.213	6.743	7.435	7.579	6.869	7.861	7.874	7.133
AGO3	AGO3	192669	1	36396682	36522063	1p34	NM_177422.2	NP_803171.1	6.291	6.236	7.126	7.062	6.325	7.304	7.046	6.786	6.909	7.154	7.124	6.722	7.061	7.545	7.532	6.881	6.572	7.157	7.42	7.171	6.83	7.086	7.21	7.124	7.085	6.382	7.919	6.941	6.409	6.162	7.271	6.952	7.135	6.95	5.934	6.713	6.858	6.672	7.888	6.932	6.389
TEKT2	TEKT2	27285	1	36549675	36553876	1p34.3	NM_014466.2	NP_055281.2	6.608	6.738	6.642	6.944	6.689	6.537	6.703		6.825	6.551	6.845	6.666	6.532	6.643	6.483	6.627	6.725	6.663	6.797	6.749	6.808	6.901	6.629	5.885	6.183	5.901	6.22	6.401	6.309	6.43	6.168	6.409	6.27	6.394	6.59	6.832	6.617	6.804	6.953	6.823	6.575
ADPRHL2	ADPRHL2	54936	1	36554452	36559533	1p34.3	NM_017825.2	NP_060295.1	6.684	7.159	6.839	7.582	7.141	7.881	7.317	6.758	7.436	7.266	7.784	7.381	7.604	7.205	7.406	8.262	7.622	7.093	7.015	7.059	7.222	7.192	7.655	8.158	7.409	7.043	7.709	7.702	7.373	6.728	7.519	7.118	7.795	7.257	6.699	6.553	7.45	6.682	7.918	7.115	6.927
COL8A2	COL8A2	1296	1	36560836	36590685	1p34.2	NM_005202.2	NP_005193.1										5.527
TRAPPC3	TRAPPC3	27095	1	36602169	36621654	1p34.3	NM_001270895.1	NP_001257825.1	7.381	7.527	7.898	8.428	7.334	8.24	8.049	7.892	7.773	8.376	8.065	8.399	7.906	8.06	8.178	8.253	7.714	7.647	7.734	7.865	8.196	7.723	8.253	8.321	8.528	7.741	8.415	7.952	7.911	7.779	8.473	8.063	7.823	7.768	7.34	7.554	7.795	6.873	9.04	8.04	7.492
MAP7D1	MAP7D1	55700	1	36621565	36646451	1p34.3	NM_018067.3	NP_060537.3	7.109	8.697	8.867	8.954	7.697	8.926	9.274	9.401	9.304	9.22	9.45	7.62	8.26	8.183	7.562	8.045	7.29	8.012	8.6	8.062	8.282	8.468	8.077	8.931	9.463	8.235	9.036	8.38	8.747	8.542	9.175	8.995	8.618	8.463	8.284	8.197	9.223	8.577	9.691	8.738	8.385
THRAP3	THRAP3	9967	1	36690016	36770957	1p34.3	NM_005119.3	NP_005110.2	7.377	7.494	7.161	7.14	7.265	8.089	7.748		7.537	7.821	7.833	7.344	7.383	8.191	8.106	8.015	7.414	7.724	7.345	7.833	7.288	7.591	7.521	8.149	7.87	7.605	7.766	7.482	7.811	7.503	7.693	7.321	7.571	7.27	6.911	6.93	7.338	6.822	7.601	7.434	7.271
SH3D21	SH3D21	79729	1	36771993	36786948	1p34.3	NM_001162530.1	NP_078952.4	6.903	6.766	7.582	7.287	6.36	7.063	6.257		6.682	6.757	7.322	7.828	7.968	6.537	6.993	7.159	7.055	6.7	6.436	6.035	6.302	6.315	6.039	7.505	6.42	7.68	7.419	6.374	7.581	6.44	7.943	6.439	6.356	6.281	6.438	6.212	6.927	6.837	7.907	6.724	6.523
EVA1B	EVA1B	55194	1	36787630	36789755	1p34.3	NM_018166.1	NP_060636.1	5.08	4.63	6.247	5.576	4.617	5.614	5.005	5.983	5.666	4.934	5.45	4.766	4.776	6.106	5.091	5.102	4.936	4.832	4.787	4.995	5.774	4.822	5.029	5.272	7.293	7.052	5.652	4.799	5.459	4.718	6.031	5.234	4.974	4.732	5.251	4.549	6.756	7.609	6.951	6.696	4.878
STK40	STK40	83931	1	36805219	36851528	1p34.3	NM_032017.1	NP_114406.1	6.861	8.133	6.682	7.046	6.883	7.822	7.086	4.996	7.399	7.058	7.758	8.264	7.952	6.831	7.413	7.265	7.541	7.889	7.62	6.977	8.343	7.324	7.757	7.685	7.716	7.41	7.892	7.241	7.477	7.12	7.864	7.516	7.992	7.741	6.202	6.716	7.259	7.441	8.576	7.752	8.18
LSM10	LSM10	84967	1	36859020	36863560	1p34.3	NM_032881.1	NP_116270.1	6.241	6.788	6.809	7.193	6.349	7.506	7.911	7.379	7.617	7.459	8.151	7.215	7.111	7.25	7.012	6.365	6.303	6.78	6.804	6.524	7.924	6.687	8.117	7.46	8.175	7.435	7.623	7.26	7.503	7.397	8.452	8.479	7.46	7.353	6.504	7.449	7.744	7.098	8.471	7.674	7.006
OSCP1	OSCP1	127700	1	36883506	36916086	1p34.3	NM_206837.2	NP_659484.4	5.772	5.278	5.648	5.995	6.118	6.337	5.784		5.782	6.396	5.782	5.169	5.388	5.702	5.894	5.566	5.537	5.478	4.797	4.456	4.526	5.171	4.444	5.467	5.683	5.512	5.877	5.347	5.713	5.244	5.686	6.167	5.167	4.976	5.102	5.633	5.657	5.275	6.176	5.572	5.604
MRPS15	MRPS15	64960	1	36921361	36930040	1p34.3	NM_031280.3	NP_112570.2	9.441	9.719	9.759	10.159	9.45	10.32	10.167	9.735	10.244	9.924	10.449	10.387	10.688	10.094	10.54	10.245	10.328	10.225	10.229	10.366	10.531	10.065	10.436	9.577	10.635	9.464	10.345	9.944	10.2	10.288	10.617	10.56	9.723	9.42	9.694	9.782	10.499	9.651	10.715	9.861	10.267
CSF3R	CSF3R	1441	1	36931643	36948915	1p35-p34.3	NM_156039.3	NP_758519.1	4.51	4.71	4.772	4.603	4.532		4.631		4.798	4.546	4.735	4.625			4.442	4.472	4.675	4.603	4.675	7.597	4.766	5.064	4.684	4.443	4.441		4.441	4.689	4.586	4.481	4.6	4.735	4.445	4.977	4.692	4.531	4.687	4.697	4.685	4.482	4.619
GRIK3	GRIK3	2899	1	37261127	37499844	1p34.3	NM_000831.3	NP_000822.2	5.437	4.985	4.92	4.911	8.177	4.758	4.989		4.942	8.191	5.014	5.02	4.812	4.791	4.741	4.833	4.928	4.899	4.919	4.965	4.97	4.839	4.949	4.802	4.857	4.795	4.703	4.886	4.851	4.846	4.739	4.945	4.888	5.048	4.908	4.82	5.004	4.875	4.893	5.173	4.874
RPS29P6	RPS29P6	100270903	1	37796452	37796579	1p34.3			5.324	4.878	5.159	5.097	5.139		4.843		5.463	4.752			4.48	4.764	5.072	5.073	5.04	4.855	4.993	5.273		5.109	5.263	4.845	5.302	5.448	5.189	4.948	4.818	5.236	5.267	5.446	4.729	4.553	5.088	5.069	5.237	5.097	5.094	4.496	5.055
LINC01137	LINC01137	728431	1	37920479	37940044	1p34.3			4.816		4.702		6.229	4.975	6.247		4.684	5.425	5.338	5.418	5.306		4.57	5.62	4.49	4.798	4.68		4.456			4.468	5.811	4.952	4.712	4.764	4.426	4.572	4.805	4.633	4.627	5.027	6.835	5.66	5.318		6.009	4.807	5.262
ZC3H12A	ZC3H12A	80149	1	37940118	37949978	1p34.3	NM_025079.2	NP_079355.2	6.607	6.586	6.518	6.508	6.155	5.906	6.158		6.743	6.114	7.14	5.916	6.049	6.026	6.404	6.621	5.921	6.163	6.849	6.719	6.296	6.647	6.078	6.46	6.309	5.829	6.274	6.096	6.089	5.75	5.905	6.028	6.218	6.379	7.212	6.567	6.755	6.657	6.974	5.873	6.491
MEAF6	MEAF6	64769	1	37955560	37980420	1p35.3-p33	NM_001270875.1	NP_001257804.1	6.816	6.344	7.271	7.276	7.446	7.896	7.147	8.219	6.843	7.262	6.975	7.048	7.384	7.32	7.148	7.142	7.167	7.215	7.433	7.12	7.729	7.518	7.342	7.53	7.805	7.582	7.676	7.357	7.367	6.984	7.907	6.759	6.924	6.938	6.36	6.867	7.223	6.341	8.029	7.322	6.931
SNIP1	SNIP1	79753	1	38000049	38019945	1p34.3	NM_024700.3	NP_078976.2	6.601	6.299	6.643	7.041	6.62	7.118	6.907		6.712	6.766	6.77	6.916	6.555	6.749	6.952	6.865	6.707	6.502	6.531	6.805	6.611	6.586	6.942	7.249	7.152	6.938	7.05	7.008	6.699	6.533	7.027	6.75	6.977	6.553	6.202	6.056	6.595	6.265	7.278	6.665	6.473
FTH1P1	FTH1P1	2496	1	38010163	38011058	1p34.3			7.429	7.034	7.035	7.689	6.777	6.923	6.482		7.195	7.534	6.878	7.283	7.606	7.043	6.679	7.48	7.644	7.192	7.169	6.667	6.854	6.421	7.172	6.546	6.843	6.931	6.893	6.524	7.179	7.565	8.162	7.321	6.382	7.235	7.185	7.017	7.314	7.462	8.44	7.271	7.902
DNALI1	DNALI1	7802	1	38022519	38032458	1p35.1	NM_003462.3	NP_003453.2					7.863		5.595																													4.642
GNL2	GNL2	29889	1	38032412	38061586	1p34.3	NM_013285.2	NP_037417.1	8.824	8.805	9.265	9.111	8.777	9.919	9.277	8.624	9.122	9.257	9.269	9.186	8.968	9.392	9.315	9.323	8.964	9.046	9.048	9.75	10.044	8.873	9.784	9.577	9.641	8.865	9.571	9.533	9.316	8.803	9.861	9.427	9.158	8.95	8.678	8.718	9.27	8.576	9.42	9.526	9.055
RSPO1	RSPO1	284654	1	38076950	38100595	1p34.3	NM_001242909.1	NP_001229837.1	6.816	6.684	6.549	7.002	6.642	6.096	6.663		6.83	6.426	7.18	6.754	6.541	6.416	6.401	6.378	6.779	6.456	6.82	6.942	7.229	6.922	6.488	6.35	6.435	6.279	5.892	6.464	6.634	6.491	6.479	6.841	6.446	6.449	6.617	6.864	6.573	6.83	6.982	6.8	6.978
C1orf109	C1orf109	54955	1	38147241	38156267	1p34.3	NM_017850.1	NP_060320.1	6.571	6.397	6.694	6.985	6.593	7.753	7.057		6.737	6.802	7.014	6.855	7.765	7.102	7.524	6.867	6.959	6.603	6.43	6.785	7.752	6.929	7.542	7.838	7.546	6.661	7.34	6.448	6.769	6.6	7.945	6.98	6.689	6.5	6.42	6.582	7.334	6.78	7.421	7.448	6.532
CDCA8	CDCA8	55143	1	38158072	38175391	1p34.3	NM_018101.3	NP_060571.1	7.341	8.334	8.122	8.99	7.537	9.021	8.342	7.881	8.617	8.308	8.558	8.074	8.057	8.233	8.227	7.921	8.256	7.914	8.088	7.847	8.229	7.884	7.858	8.694	8.242	7.229	8.205	7.757	7.87	7.581	8.322	7.871	7.935	7.686	7.393	7.219	8.289	7.987	8.154	8.118	7.631
EPHA10	EPHA10	284656	1	38181645	38230824	1p34.3	NM_001099439.1	NP_775912.2	4.899	4.489			5.237								5.109	5.287	5.842	4.758	5.382	4.992					4.557							4.443				4.533	4.611	4.576			4.531	5.139	4.894
ACTN4P2	ACTN4P2	391026	1	38232106	38245183	1p34.3			6.694	7.289	7.484	7.12	6.559	6.484	7.316		7.878	7.097	6.869	6.951	6.755	6.458	6.54	7.016	7.133	6.669	6.202	6.77	6.399	5.934	6.276	6.604	6.681	6.844	6.734	6.374	6.824	6.447	6.482	6.982	6.398	6.696	7.449	6.743	7.312	6.881	7.043	6.468	6.648
MANEAL	MANEAL	149175	1	38259773	38267278	1p34.3	NM_001113482.1	NP_001106954.1	6.61	6.955	7.44	5.068	7.62	7.591	7.187	4.587	7.112	7.016	6.533	5.843	8.263	7.123	8.202	7.631	7.68	7.588	7.282	5.2	5.458	6.743	8.213	7.722	7.009	5.44	8.246	6.077	7.342	7.349	8.522	8.131	7.952	7.987	7.007	7.626	5.35	5.535	7.1	7.835	8.198
YRDC	YRDC	79693	1	38268613	38273865	1p34.3	NM_024640.3	NP_078916.3	6.963	7.321	7.287	7.552	6.659	7.748	7.952	6.1	7.557	7.074	7.896	7.552	7.896	7.98	7.756	7.599	7.559	7.657	7.495	7.427	8.529	7.715	8.03	7.973	8.448	7.217	7.846	8.514	7.871	7.576	8.901	8.446	7.97	7.76	6.713	7.262	8.406	6.899	8.227	7.702	7.269
C1orf122	C1orf122	127687	1	38273472	38275126	1p34.3	NM_001142726.1	NP_940848.2	8.372	8.325	8.571	8.613	9.124	8.726	8.69	8.75	8.734	9.093	8.955	8.705	9.096	8.148	8.406	8.327	8.84	8.248	7.776	6.947	8.379	7.891	8.606	8.758	8.491	8.557	8.332	9.175	8.277	7.961	9.015	9.106	9.022	8.829	8.133	8.742	8.665	8.509	9.469	9.085	8.512
MTF1	MTF1	4520	1	38275238	38325292	1p33	NM_005955.2	NP_005946.2	6.711	6.271	6.583	7.022	6.713	6.854	7.307	6.768	6.8	6.996	6.905	6.753	7.359	7.207	7.137	7.346	6.849	6.24	6.623	6.764	6.132	6.439	6.749	7.315	7.151	6.81	7.14	7.57	6.756	6.138	7.207	7.043	6.754	6.583	5.995	6.39	6.864	6.668	7.298	7.146	6.388
INPP5B	INPP5B	3633	1	38326368	38412729	1p34	NM_005540.2	NP_005531.2	7.084	6.528	6.979	6.221	6.869	7.776	6.909	5.179	7.401	7.937	7.422	7.236	7.543	7.867	7.995	7.673	7.455	7.784	7.797	8.3	7.931	7.677	7.376	7.832	7.812	7.563	7.53	7.414	7.601	7.868	8.229	7.594	6.982	6.955	6.386	6.655	6.976	6.651	7.47	6.93	6.782
SF3A3	SF3A3	10946	1	38422651	38455761	1p34.3	NM_006802.2	NP_006793.1	8.095	8.386	8.392	9.274	8.097	9.322	8.851	7.979	8.739	8.697	8.897	8.853	8.618	8.908	8.901	8.885	8.991	8.982	9.185	9.775	9.747	8.88	9.207	9.395	9.697	8.609	9.391	9.222	8.997	8.278	9.549	9.213	9.205	8.915	8.106	8.059	8.807	8.145	9.317	8.829	8.085
FHL3	FHL3	2275	1	38462441	38471187	1p34	NM_001243878.1	NP_001230807.1	6.078	6.67	7.073	6.416	6	6.856	6.827	5.664	6.486	7.624	7.103	6.613	6.864	7.07	6.861	6.9	6.716	7.195	5.913	7.539	8.887	5.562	5.322	6.767	6.98	7.038	6.821	6.315	6.534	6.406	7.187	7.869	7.023	7.1	6.012	6.927	7.181	6.532	6.147	6.525	6.402
UTP11L	UTP11L	51118	1	38478383	38490497	1p34.3	NM_016037.3	NP_057121.2	7.694	7.674	8.286	8.76	7.793	8.821	8.584	7.792	8.361	8.195	8.545	8.594	8.659	8.476	8.425	8.099	8.287	8.314	8.299	8.981	9.374	8.35	8.634	9.001	8.972	8.845	8.353	8.816	8.591	8.11	9.099	8.825	8.423	8.234	7.656	7.778	8.367	7.592	8.772	8.257	7.982
POU3F1	POU3F1	5453	1	38509522	38512450	1p34.1	NM_002699.3	NP_002690.3											4.428					4.493					4.654					7.716		4.546	5.151	5.227	7.764
LOC100130627	LOC100130627	100130627	1	39137774	39138478	1p34.3			4.46	4.433			4.912				4.619		4.562					6.26			4.535																	4.478	4.705		4.553
RRAGC	RRAGC	64121	1	39303868	39325495	1p34	NM_022157.3	NP_071440.1	6.349	7.001	7.423	8.206	6.935	8.212	7.273	7.389	7.234	7.695	7.573	6.488	7.436	6.588	6.721	6.955	6.273	6.128	6.434	6.661	6.714	6.508	6.665	8.452	7.292	7.473	8.257	7.165	7.627	7.543	8.319	7.313	7.32	7.184	6.232	7.677	7.182	7.248	8.24	6.706	6.847
MYCBP	MYCBP	26292	1	39328161	39339050	1p33-p32.2	NM_012333.4	NP_036465.2	5.62	5.315	5.4	4.73	5.595	5.075	5.476	5.359	5.524	5.369	5.772	5.979	5.902	5.514	6.191	5.65	5.164	5.508	5.251	6.527	6.654	5.426	5.988	5.301	5.641		4.568	5.457	5.257		5.539	5.74	5.384	4.521	4.933	6.449	5.553	5.736	5.292	5.325	5.324
RHBDL2	RHBDL2	54933	1	39351477	39407502	1p34.3	NM_017821.3	NP_060291.2		5.317			4.938		4.867			4.602						7.635																							5.105
AKIRIN1	AKIRIN1	79647	1	39456915	39471737	1p34.3	NM_001136275.1	NP_078871.1	6.917	7.256	7.767	7.863	7.132	8.283	7.868	7.47	7.869	7.821	8.244	7.582	8.133	8.17	7.948	8.633	7.862	7.763	7.139	8.138	8.719	7.284	7.908	9.019	8.612	8.042	8.195	8.44	8.718	8.263	8.954	8.379	7.623	7.32	7.251	9.187	8.378	7.557	8.668	9.335	7.984
NDUFS5	NDUFS5	4725	1	39491966	39500308	1p34.2-p33	NM_004552.2	NP_001171908.1	7.683	7.566	8.205	8.845	8.242	8.318	7.993	9.088	8.229	7.965	8.387	7.898	7.98	8.337	7.689	8.266	7.616	7.39	8.4	8.795	8.547	7.621	8.226	9.081	8.516	7.477	8.075	8.177	8.003	7.954	8.953	8.78	8.026	7.829	7.059	10.027	8.048	8.195	8.301	8.484	8.142
MACF1	MACF1	23499	1	39549838	39952810	1p32-p31	NM_012090.5	NP_036222.3	7.029	8.088	8.716	8.109	6.273	8.947	7.956	8.383	8.768	9.156	8.687	8.013	6.944	7.767	7.59	7.396	7.403	7.973	8.718	7.801	8.154	6.584	6.922	9.035	8.323	7.898	8.836	7.889	8.223	7.818	8.48	8.62	8.221	7.916	7.642	9.237	8.277	7.769	9.613	7.281	8.029
LOC100292290	LOC100292290	100292290	1	39769965	39770569	1p32-p31								4.667
KIAA0754	KIAA0754	643314	1	39875175	39882154	1p34.3	NM_015038.1	NP_055853.1	5.925	6.989	7.525	7.34	4.997	7.78	6.565		7.025	7.084	6.837	7.585	6.144	7.026	6.709	7.147	6.396	7.162	6.995	5.328	6.029	6.094	5.441	7.101	7.104	6.583	7.403	7.059	7.322	6.756	7.484	6.7	6.904	6.791	6.07	8.663	7.584	6.931	8.061	5.926	7.072
BMP8A	BMP8A	353500	1	39957317	39995541	1p34.3	NM_181809.3	NP_861525.2	5.886	5.148	4.984	5.342	5.463	5.311	5.357		5.554	5.674	5.553	5.207	5.626	6.077	5.223	5.25	5.777	5.672	5.569	5.873	5.269	5.522	5.97	5.606	5.102	4.975	5.184	5.157	5.545	5.136	4.995	5.135	5.118	5.833	5.182	5.458	5.124	5.653	5.431	5.446	5.394
PPIEL	PPIEL	728448	1	39987951	40025370	1p34.3							5.322					5.043			4.558	4.897	4.797	4.477			4.467	7.463		4.462		4.94		4.768		4.626	4.626	4.498	4.916	4.492			4.618	4.859			4.553	5.022
SNORA55	SNORA55	677834	1	40033045	40033182	1p34.3			7.824	7.75	7.806	8.017	7.953	8.206	7.759		7.981	7.648	7.878	7.466	7.918	8.448	8.28	8.279	7.942	8.052	8.145	7.967	8.303	7.991	7.988	8.49	7.491	8.019	8.204	8.275	7.872	8.119	8.456	8.067	8.096	7.834	8.1	8.147	8.013	7.465	7.542	7.782	7.826
HEYL	HEYL	26508	1	40089102	40105348	1p34.3	NM_014571.3	NP_055386.1	5.229	5.005	4.677	4.601	4.777		4.741		4.665	4.622	4.857	4.718	4.813	6.473	4.628	4.719	4.797	4.868	4.653	4.709	4.902	4.68	4.909	4.544	4.576	4.519	4.594	4.556	4.687	4.89	4.61	4.673	4.52	4.962	5.448	5.984	5.128	4.761	4.585	5.559	4.953
HPCAL4	HPCAL4	51440	1	40144319	40157382	1p34.2	NM_016257.2	NP_057341.1							4.496							5.702												4.528		4.669			4.656									4.609
PPIE	PPIE	10450	1	40204516	40229586	1p32	NM_001195007.1	NP_982281.1	7.229	7.193	7.55	7.359	7.651	7.556	6.228	7.409	7.887	7.73	7.937	8.1	7.71	8.324	7.95	7.824	7.032	7.898	6.988	7.909	8.441	6.962	7.699	8.285	7.948	7.832	7.931	8.281	7.962	7.722	8.507	8.084	7.801	7.69	7.26	8.624	7.154	7.035	7.917	7.77	7.434
BMP8B	BMP8B	656	1	40223902	40254533	1p35-p32	NM_001720.3	NP_001711.2	4.816	4.672			4.932	4.435			4.561	5.582	4.495	4.782	4.911	5.674	5.445	4.796	4.996	4.686		4.485			5.372	5.6		7.99	4.999	6.119	6.147	4.821	5.229	4.617	4.439	4.941	5.184	5.428				5.143	4.875
OXCT2	OXCT2	64064	1	40235196	40237020	1p34	NM_022120.1	NP_071403.1	5.218				4.766					4.981			5.061	6.03	5.564	4.748	4.816	4.586					5.107	6.111	4.591	6.736		6.101	5.342		4.522			4.54		4.709				4.826	4.515
TRIT1	TRIT1	54802	1	40306705	40349183	1p34.2	NM_017646.4	NP_060116.2	6.964	6.814	7.688	7.882	7.469	8.079	7.284	6.748	7.134	7.131	7.817	8.081	7.941	8.13	8.199	7.962	8.003	8.545	7.535	8.004	8.618	7.554	8.071	8.49	8.209	7.213	7.478	8.085	7.535	7.779	8.072	8.219	7.369	7.07	7.065	8.415	7.731	7.258	7.599	8.195	7.414
MYCL	MYCL	4610	1	40361095	40367687	1p34.2	NM_005376.4	NP_001028254.2	4.727			5.243	5.124	5.1			4.743	4.735	4.46	6.548	5.065	5.594	5.805		5.652	5.551			5.585		4.948	4.473	4.63			4.479	4.488	5.304	5.088	4.892			4.608	6.175	4.456		5.017	6.856	5.015
MFSD2A	MFSD2A	84879	1	40420783	40435640	1p34.2	NM_001136493.1	NP_116182.2	4.932	6.223	5.498	5.883	5.676	7.108	6.83		8.333	7.117	8.423	6.187	7.514	6.02	6.388	5.934	5.702	5.802	5.782	6.503	4.641	6.475	6.449		6.015	5.944	6.034	4.6		5.342	6.381	6.441	5.434	4.853	5.348	5.398	6.343	6.119	5.862	5.63	5.521
CAP1	CAP1	10487	1	40506254	40538321	1p34.2	NM_006367.3	NP_006358.1	8.797	10.237	11.015	10.867	9.528	10.743	10.107	10.742	10.557	10.611	10.275	10.352	10.193	10.232	9.88	10.08	10.095	9.728	9.833	10.353	10.045	9.508	9.509	10.709	11.009	10.444	10.618	10.774	11.276	10.073	10.959	10.664	10.465	10.02	9.706	11.089	10.496	10.254	10.74	10.002	9.963
PPT1	PPT1	5538	1	40538381	40563142	1p32	NM_001142604.1	NP_001136076.1	9.88	8.856	9.509	9.746	10.239	9.73	9.76	9.636	9.557	10.06	9.758	10.176	9.598	9.094	10.368	9.989	10.041	9.329	9.253	10.374	9.746	9.249	10.22	10.323	10.309	10.151	10.167	10.148	10.357	9.66	10.659	10.287	9.748	9.418	8.616	10.142	9.779	8.674	9.254	10.173	10.16
RLF	RLF	6018	1	40627040	40706593	1p32	NM_012421.3	NP_036553.2	7.378	7.033	7.945	8.162	7.546	8.285	7.672	6.624	8.011	8.274	8.23	7.356	7.726	8.015	8.055	7.701	8.185	7.456	7.361	7.405	8.09	7.262	7.486	8.162	7.843	7.454	8.021	7.469	8.097	7.431	8.48	7.946	7.201	6.986	6.788	8.584	7.514	7.021	7.601	7.831	7.884
ZMPSTE24	ZMPSTE24	10269	1	40723721	40759856	1p34	NM_005857.4	NP_005848.2	8.958	9.161	9.345	9.828	9.458	9.673	9.986	8.939	9.851	9.764	9.508	9.757	10.024	9.422	9.773	9.462	9.461	9.05	9.233	9.358	9.424	8.506	9.629	9.676	9.544	9.25	9.613	9.532	9.415	8.819	9.611	9.628	9.203	9.254	8.839	10.735	9.713	9.183	9.468	9.445	9.492
COL9A2	COL9A2	1298	1	40766162	40782939	1p33-p32	NM_001852.3	NP_001843.1	4.525				4.675																							4.425												4.632
SMAP2	SMAP2	64744	1	40839377	40888998	1p35.3-p34.1	NM_022733.2	NP_001185908.1	6.962	6.899	8.122	7.734	7.201	8.171	8.528	5.209	7.281	8.153	7.831	8.466	7.42	7.108	6.902	6.951	7.456	7.945	8.214	8.265	9.482	7.746	8.861	8.374	8.019	7.179	7.881	7.84	8.28	7.292	7.953	8.87	8.172	8.024	5.96	7.431	6.96	7.19	6.466	7.263	6.821
ZFP69B	ZFP69B	65243	1	40916336	40929390	1p34.2	NM_023070.2	NP_075558.2	6.039	5.634	6.354	6.652	5.46	6.481	6.292		5.408	6.047	5.921	5.51	6.138	4.587	5.843	5.065	5.833	5.793	6.449	5.548	6.456	6.705	5.781	6.082	7.068	5.052	5.468	6.327	4.939	5.117	6.115	6.364	6.283	5.742	5.232	6.842	5.725	5.772	4.958	6.767	5.613
ZFP69	ZFP69	339559	1	40943301	40962015	1p34.2	NM_198494.2	NP_940896.2	5.691	4.954	5.671	5.918			5.459	5.272		4.986		5.992	5.894		5.839		5.769	5.604	5.894	5.613	5.79	5.113	5.654	5.403	6.208	5.015	5.944	5.803	5.411	4.924	6.134	4.89	6.287	5.72		6.585	5.766	5.206	5.178	5.905
EXO5	EXO5	64789	1	40974432	40982214	1p34.2	NM_022774.1	NP_073611.1	5.484	5.699	4.882	5.748	5.551		5.028	5.286	5.093	5.573	4.781					5.419	5.05	5.526	6.011	5.463	4.586	6.153	5.216	5.875	4.463		5.091	5.311	5.213	4.522	5.64	4.51	4.738	4.893	4.493	6.247	5.943	4.969	5.109	5.756	5.482
ZNF684	ZNF684	127396	1	40997232	41013841	1p34.2	NM_152373.3	NP_689586.3	4.426		4.729	5.186		4.973	4.814		4.689	4.836	4.716	4.733		4.662			5.25	4.471	4.754	4.888	4.45	4.907	4.67		4.761	4.521	5.141	4.884	5.117		5.287	4.745	4.991	5.629		5.603
RIMS3	RIMS3	9783	1	41086351	41131324	1pter-p22.2	NM_014747.2	NP_055562.2	5.699	5.416	6.194	5.872	5.252	5.589	5.351	4.95	6.176	6.09	5.93	5.982	5.713	6.255	5.74	5.078	5.19	5.616	7.444	5.14	5.289	6.578	7.142	6.335	5.491	5.42	5.346	5.053	5.273	5.648	5.107	5.266	5.272	5.55	5.465	6.017	5.15	5.34	5.403	6.244	5.19
NFYC-AS1	NFYC-AS1	100130557	1	41154751	41157933	1p34.2			6.605	5.853	5.311	6.2	6.268	6.052	5.235		5.963	6.127	5.832	5.499	6.315	5.318	6.559	6.76	5.675	6.102	6.318	6.203	5.869	6.539	5.799	5.999	5.679	5.349	6.909	5.862	6.021	5.851	6.683	5.68	6.12	6.537	5.389	6.506	5.804	6.013	5.911	6.036	5.233
NFYC	NFYC	4802	1	41157241	41237276	1p32	NM_001142587.1	NP_001136060.1	7.333	7.184	6.445	7.448	7.2	7.975	7.55	6.226	7.885	7.485	7.742	7.854	7.74	7.989	7.993	7.597	7.369	7.784	8.389	8.033	7.864	8.187	8.183	8.054	8.002	7.43	8.424	7.957	8.059	7.931	8.442	7.819	8.009	8.071	7.521	9.173	7.736	6.55	7.724	8.657	8.051
MIR30C1	MIR30C1	407031	1	41222955	41223044	1p34.2			4.423	4.597	4.644		4.822		5.075		5.69	5.233	5.355	5.027	5.734	4.663	5.166	4.454	4.857	4.517	5.467	5.315	5.122	4.673	5.294	4.567	4.679	5.161		5.471		5.167		5.232	4.58	4.961	5.295	5.23	4.584	5.263	4.528	4.688	4.496
KCNQ4	KCNQ4	9132	1	41249683	41306124	1p34	NM_004700.3	NP_751895.1	6.056	5.356	5.029	5.422	5.571	4.988	5.088		5.016	5.076	5.159	5.057	6.417	6.619	6.659	6.546	5.272	5.932	5.212	6.158	6.222	6.029	5.715	5.037	4.921	5.994	4.986	5.095	4.917	5.055	5.028	5.06	4.991	5.436	5.174	5.455	5.198	5.867	5.027	5.282	5.04
CITED4	CITED4	163732	1	41326727	41328018	1p34.2|1p35-p34	NM_133467.2	NP_597724.1					6.298															5.438							6.271						6.299	7.829	5.612	6.229				4.775	7.175
CTPS1	CTPS1	1503	1	41444970	41478237	1p34.1	NM_001905.2	NP_001896.2	8.349	9.018	9.192	9.256	7.919	9.948	8.955	6.882	9.26	8.765	8.942	8.887	9.138	8.852	9.25	9.08	8.209	8.912	9.463	9.082	9.168	9.425	9.366	9.105	9.509	8.472	9.542	8.943	9.156	8.446	9.767	9.496	8.952	8.817	9.569	10.743	9.906	8.375	8.851	9.107	8.43
SLFNL1-AS1	SLFNL1-AS1	100507178	1	41480261	41509562	1p34			6.125	6.498	6.16	6.314	6.659	6.672	6.105		6.454	6.565	6.617	5.789	5.981	6.949	7.265	6.29	6.262	6.483	6.9	6.426	6.092	6.551	6.594	6.398	5.384	5.64	6.617	6.292	6.314	5.879	6.402	6.149	6.054	6.061	7.11	7.651	6.601	6.42	6.402	6.163	6.311
SLFNL1	SLFNL1	200172	1	41481268	41487427	1p34.2	NM_144990.3	NP_659427.3		4.593								4.987				4.494	4.92							4.507	4.494	4.44			4.691	4.522			4.438		4.464	4.529	4.91	5.964	4.804			4.547
SCMH1	SCMH1	22955	1	41492870	41707815	1p34	NM_001172221.1	NP_001165693.1	6.837	8.091	8.147	8.236	7.447	8.441	7.872	5.627	8.232	8.522	7.57	7.457	7.72	7.676	8.069	8.375	7.427	8.164	8.65	8.578	7.849	8.373	7.946	8.618	8.11	7.702	8.077	7.849	7.225	7.705	8.306	7.824	8.099	7.826	7.082	9.139	7.913	8.041	8.109	7.768	7.515
FOXO6	FOXO6	100132074	1	41827602	41849263	1p34.2			5.59	5.502	4.933	4.635	5.601	4.504	4.715	5.091	4.773	4.603	5.224	4.508	4.594	5.722	4.741	5.3	4.96	5.397	4.722	4.905	4.883	5.046	6.054		4.693	5.292		4.79	4.54	4.87	5.383	4.463	4.483		4.91	5.458	5.66	5.204	4.788	6.219	5.119
EDN2	EDN2	1907	1	41944445	41950354	1p34	NM_001956.3	NP_001947.1	6.024	5.847	5.816	5.634	5.796	5.63	5.616		5.833	5.665	5.981	5.672	5.519	5.493	5.66	5.738	5.907	5.612	5.755	5.815	5.923	5.763	5.952	5.371	5.746	5.485	5.614	5.633	5.601	5.647	5.517	5.73	5.638	5.66	6.252	5.735	5.857	5.844	5.832	5.773	5.766
HIVEP3	HIVEP3	59269	1	41972035	42501596	1p34	NM_001127714.2	NP_078779.2	6.621	6.664	5.586	4.915	6.106	6.638	6.033	4.654	7.604	6.427	7.102	5.353	4.802	6.09	4.707	5.781	5.883	5.209	5.377	6.109	4.922	6.547	6.456	5.241	6.229	5.695	6.965	5.471	5.226	4.944	5.671	5.691	6.175	5.871	5.057	6.279	5.789	7.05	5.708	5.627	5.501
HNRNPFP1	HNRNPFP1	644449	1	42506215	42508515	1p34.2			7.896	7.503	6.698	7.92	7.978	7.233	7.413		7.576	6.829	7.762	8.312	8.048	7.763	7.941	8.06	7.703	7.935	7.777	7.9	8.053	7.62	7.526	7.777	7.829	7.337	7.381	7.806	7.649	7.475	7.378	7.341	7.525	7.193	7.436	7.293	7.217	7.137	7.441	7.522	7.534
GUCA2A	GUCA2A	2980	1	42628361	42630395	1p35-p34	NM_033553.2	NP_291031.2												5.175																						5.505
FOXJ3	FOXJ3	22887	1	42642209	42801548	1p34.2	NM_014947.4	NP_001185779.1	8.121	8.242	8.725	8.794	8.478	9.19	8.928	8.105	8.857	8.964	8.957	9.078	9.013	9.201	9.01	9.126	9.074	8.69	8.902	8.748	8.476	8.771	8.889	8.951	9.395	8.579	9.145	9.274	9.169	8.675	9.366	9.13	8.737	8.372	8.2	9.815	8.959	8.341	8.94	9.126	8.83
RIMKLA	RIMKLA	284716	1	42846467	42889900	1p34.2	NM_173642.3	NP_775913.2	4.702				4.447	5.349			4.796		5.414	5.819	5.01	5.35	5.419	5.484	6.893	5.338	4.858			5.428	4.453	6.668			4.513			4.931					5.325	5.606				4.551	5.07
ZMYND12	ZMYND12	84217	1	42896000	42921938	1p34.2	NM_032257.4	NP_115633.3	4.629																4.497			4.571				5.631					4.649		5.539									4.96
PPCS	PPCS	79717	1	42922011	42939049	1p34.2	NM_001077447.1	NP_078940.2	8.169	7.365	7.883	7.339	8.468	8.023	6.959	7.493	7.53	7.265	8.495	8.88	8.367	8.363	8.604	8.452	7.968	7.528	7.431	7.94	6.559	7.066	7.637	8.045	8.45	8.41	8.531	8.38	8.579	7.953	8.977	8.268	7.807	7.86	7.658	9.741	7.831	7.972	8.983	8.098	9.236
CCDC30	CCDC30	728621	1	43000559	43120335	1p34.2	NM_001080850.2	NP_001074319.1					4.426																															4.943
PPIH	PPIH	10465	1	43124047	43142429	1p34.1	NM_006347.3	NP_006338.1	9.034	9.132	8.934	9.487	8.636	9.429	9.514	6.727	9.568	8.921	9.708	9.611	9.603	10.149	9.756	9.394	9.42	9.507	9.693	10.402	10.41	9.964	9.839	10.086	9.42	8.611	9.299	9.534	9.179	8.482	9.356	9.345	9.388	9.241	8.893	9.93	9.374	8.493	9.406	9.437	8.897
YBX1	YBX1	4904	1	43147905	43169474	1p34	NM_004559.3	NP_004550.2	9.819	10.003	10.64	10.813	9.281	10.93	10.268	12.576	10.877	10.648	10.868	10.768	10.611	10.589	10.762	10.58	10.055	10.713	10.77	11.075	10.716	10.838	11.25	10.676	10.935	10.204	10.877	9.878	10.818	10.483	11.23	11.064	10.344	9.909	9.98	11.057	10.802	10.302	10.444	10.203	9.941
CLDN19	CLDN19	149461	1	43198763	43205925	1p34.2	NM_001185117.1	NP_001172046.1	6.71	6.806	6.415	6.757	6.583	6.145	6.308		7.01	6.319	7.067	6.584	6.883	6.338	6.528	6.296	6.418	6.484	7.256	6.941	7.027	6.973	6.683	6.167	6.484	6.163	6.59	6.687	6.503	6.422	6.399	6.825	6.497	7.053	7.014	6.578	6.755	6.899	6.804	6.809	7.028
P3H1	P3H1	64175	1	43212005	43232755	1p34.1	NM_001146289.1	NP_001139761.1	5.632	7.911	8.768	8.411	5.867	8.072	8.374	9.268	7.718	9.496	8.018	6.216	6.441	7.104	6.743	6.075	6.63	7.115	7.285	7.555	7.634	7.225	6.751	7.552	7.697	7.612	8.403	8.041	8.024	6.689	8.146	8.575	7.609	7.428	6.604	8.603	8.09	7.604	7.493	7.854	6.002
C1orf50	C1orf50	79078	1	43232915	43241413	1p34.2	NM_024097.3	NP_077002.2								4.65		4.681	4.596				4.604			5.163	4.558	4.715		4.667	4.654	4.463							5.175					6.046	4.717		4.61	5.417
LOC100129924	LOC100129924	100129924	1	43253660	43263901	1p34.2	NM_001242750.1	NP_001229679.1	5.075	4.572		4.701	5.564	4.782	4.444		4.453	4.554	4.818		5.308	4.951	5.475		4.568	5.704	4.688	4.496	4.984	5.039	4.679	4.914	4.724				4.582	4.546	4.774				4.467	5.052	4.602	5.125	4.554	4.526
SVBP	SVBP	374969	1	43272722	43283059	1p34.2	NM_199342.3	NP_955374.1	5.143	6.721	5.462	5.868	4.948	7.43	5.909	6.713	7.041	6.485	6.872	6.327	5.336	6.005	6.612	6.27	5.701	6.885	6.593	6.731	7.363	6.407	5.094	6.584	5.698	5.119	6.103	5.406	5.67	4.707	5.589	5.263	5.049	4.485	5.802	7.188	6.564	6.12	5.572	7.591	5.814
ERMAP	ERMAP	114625	1	43282775	43310660	1p34.2	NM_018538.3	NP_061008.2	6.226	5.552	5.657	6.201	6.393	6.222	6.2		5.723	6.498	5.587	6.144	6.159	5.632	5.673	6.719	5.923	6.33	5.716	5.533	7.992	5.547	5.132	5.72	5.471	6.1	5.669	5.165	5.299	5.177	5.525	5.404	4.82	5.181	5.496	7.369	6.143	5.487	6.141	6.203	6.133
ZNF691	ZNF691	51058	1	43312243	43318146	1p34.2	NM_015911.3	NP_056995.1	6.632	6.129	6.282	6.591	6.618	6.703	6.478		6.234	6.713	6.463	6.583	6.658	6.779	6.04	6.591	6.867	6.663	6.877	6.647	7.001	6.999	6.963	6.586	6.776	6.712	6.656	6.457	6.66	6.378	7.281	6.963	6.57	7.187	6.392	7.743	6.725	6.525	6.523	6.766	6.39
ATP6V1E1P1	ATP6V1E1P1	343515	1	43368902	43369582	1p34.2			11.362	11.112	11.715	11.431	11.402	11.345	11.828		11.368	11.497	11.791	11.812	11.828	11.617	11.519	10.937	11.483	11.146	11.221	11.031	11.865	11.181	10	11.453	11.274	12.685	12.46	11.799	12.905	11.896	12.493	12.347	12.338	12.421	11.109	12.041	11.436	11.366	11.405	11.209	12.269
SLC2A1	SLC2A1	6513	1	43391045	43424847	1p34.2	NM_006516.2	NP_006507.2	9.161	9.53	9.102	7.956	7.659	9.378	9.03	6.701	10.13	8.86	10.422	8.702	10.054	8.618	8.889	10.297	9.701	10.404	7.985	8.147	8.82	7.888	8.514	9.78	9.243	8.015	8.836	8.934	9.228	8.179	8.049	8.829	8.306	8.052	8.568	8.808	8.838	9.985	8.859	7.485	9.69
SLC2A1-AS1	SLC2A1-AS1	440584	1	43424719	43449029	1p34.2			5.392	4.528	4.648	4.669	4.937	5.097	4.472		4.912	4.664	5.493	4.821	5.442	4.95	5.037	5.865	5.134	6.678		4.505	4.886	4.795		4.682	4.77	5.422	4.783	4.69	5.325	4.836	4.73	4.589			4.762	5.353	4.848	6.203	4.55		5.258
FAM183A	FAM183A	440585	1	43613593	43622067	1p34.2	NM_001101376.2	NP_001094846.2	4.983	5.051	5.122	5.415	5.369		4.967		5.061	4.674	4.979	4.694	4.598		5.365	5.116	5.073	5.085	5.022	4.796	5.008	4.782	4.91			4.624	4.715	4.562	4.828		4.634	5.102	4.445	4.541	5.269	5.697	4.947	5.067	4.92	5.012	4.952
CFAP57	CFAP57	149465	1	43638000	43720029	1p34.2	NM_001167965.1	NP_001161437.1				4.678	4.739																							5.203
LOC100131756	LOC100131756	100131756	1	43705871	43707973	1p34.2			5.098	5.282	5.369		4.885		5.266		5.124	4.669	5.168	4.627	5.017	5.03	4.922	4.757	5.442	4.874	5.18	5.12	4.591	5.151	5.539		4.655	4.855	4.613	5.407	5.163	4.653	4.672	4.989	4.692	5.491	4.866	5.229	5.219	5.362		5.5	4.711
TMEM125	TMEM125	128218	1	43735664	43739673	1p34.2	NM_144626.2	NP_653227.1	6.249	5.33	5.356	5.327	7.599	5.114	5.209		5.359	5.218	5.326	8.096	7.302	6.067	7.512	7.437	6.535	5.63	5.28	5.366	5.335	5.305	5.312	5.138	5.185	5.046	5.119	5.215	5.311	5.132	5.064	5.291	5.128	5.469	5.277	5.224	5.276	5.325	5.318	5.551	7.12
C1orf210	C1orf210	149466	1	43747556	43751288	1p34.2	NM_001164829.1	NP_001158301.1	6.155	4.7	4.491	4.487	6.737	4.449	4.476		4.503	4.426	4.571	8.024	6.228	5.713	6.668	6.997	6.612	6.068	4.629	4.555	4.731	4.48	4.499	4.442		4.487			4.442	4.449	4.48	4.512		4.755	4.438	4.524	4.592	4.496	4.552	4.503	5.836
TIE1	TIE1	7075	1	43766565	43788781	1p34-p33	NM_001253357.1	NP_005415.1	4.839	5.049	5.034	4.975	4.962	4.765	5.178		4.991	5.095	4.927	4.904	4.87	4.78	4.821	4.944	5.019	4.93	5.253	5.053	5.183	5.049	4.993	4.847	4.85	6.107	4.843	4.594	4.773	4.957	5.165	5.144	4.82	4.928	4.926	4.895	6.025	5.098	5.294	5.071	4.984
MPL	MPL	4352	1	43803474	43820135	1p34	NM_005373.2	NP_005364.1	5.126	5.261	5.566	5.277	5.227	5.09	5.311		5.257	4.803	5.577	5.85	5.688	5.832	5.641	5.484	5.723	5.66	5.432	5.197	5.182	5.12	5.612	4.729	5.118	5.086	5.308	5.345	5.122	5.138	5.343	5.517	5.345	4.794	5.376	5.543	5.301	5.43	5.049	5.338	5.249
CDC20	CDC20	991	1	43824625	43828873	1p34.1	NM_001255.2	NP_001246.2	9.335	9.761	9.778	10.351	8.942	10.525	9.783	9.583	10.521	9.895	10.411	9.362	9.952	10.416	10.279	9.803	9.604	9.523	9.814	9.755	9.654	9.538	8.959	10.011	10.203	8.601	9.775	9.746	9.707	9.047	9.937	10.045	9.244	9.28	9.871	10.307	10.519	9.712	9.267	9.559	9.683
MED8	MED8	112950	1	43849578	43855483	1p34.2	NM_201542.4	NP_963836.2	6.449	6.784	8.048	8.123	7.138	7.682	7.761	7.62	7.57	8.142	7.657	7.83	6.975	7.013	6.952	7.714	7.096	7.216	6.844	7.167	7.668	6.648	7.578	7.588	7.837	7.861	7.574	7.748	7.859	6.791	8.541	7.632	7.537	7.383	6.848	8.188	7.107	7.237	7.705	7.279	7.272
SZT2	SZT2	23334	1	43855555	43919918	1p34.2	NM_015284.3	NP_056099.3	7.15	7.112	7.687	7.68	7.611	7.779	7.527		7.681	8.47	7.972	7.168	7.799	7.477	7.752	7.803	7.353	7.514	7.827	7.66	7.114	7.704	7.736	7.706	7.394	7.727	7.808	7.77	7.976	7.364	8.521	7.777	7.34	7.135	7.099	8.574	7.479	7.44	7.535	7.586	7.501
HYI	HYI	81888	1	43916673	43919660	1p34.2	NM_031207.5	NP_112484.3	4.837	7.303	5.322	6.07	5.264	6.881	5.627	5.317	5.646	5.669	5.661	5.216	4.728	5.231	6.128	5.521		4.773	6.186	5.046	4.47	5.9	4.615	4.672	6.189	5.703	5.921	6.415	5.658	4.851	6.277	4.581	5.611	5.092	4.953	6.98	7.309	6.281	8.269	5.617
PTPRF	PTPRF	5792	1	43996546	44089343	1p34	NM_002840.3	NP_569707.2	8.361	8.464	8.273	8.072	8.928	9.116	7.517	5.884	7.983	7.229	7.933	8.687	8.486	8.51	8.039	8.945	8.397	7.434	7.73	5.86	5.803	5.728	5.911	5.46	8.568	6.423	7.677	8.616	6.916	7.44	6.544	7.818	7.971	7.53	8.3	9.301	9.332	8.572	9.468	8.008	8.667
KDM4A	KDM4A	9682	1	44115796	44171189	1p34.1	NM_014663.2	NP_055478.2	7.778	7.022	7.57	8.105	7.352	7.987	7.712		7.611	7.992	8.009	7.757	8.315	8.31	7.958	7.911	8.042	7.907	7.747	7.98	7.132	7.615	7.389	7.984	8.175	7.866	8.441	7.898	7.881	7.65	8.197	8.074	7.686	7.427	6.957	8.563	7.314	7.555	8.374	7.951	7.255
KDM4A-AS1	KDM4A-AS1	100132774	1	44165408	44173012	1p34.1			6.687	6.494	6.536	6.648	6.637	7.032	6.655		6.701	6.95	6.85	6.595	6.492	6.554	6.665	6.484	6.318	6.793	6.8	6.361	6.664	6.473	6.741	6.797	7	6.766	7.166	6.702	6.932	6.449	7.227	6.913	7.005	6.725	6.373	7.485	6.847	6.695	6.624	6.815	6.247
ST3GAL3	ST3GAL3	6487	1	44173203	44396837	1p34.1	NM_006279.3	NP_001257394.1	5.968	7.166	7.537	7.2	6.015	7.444	7.008		7.137	7.505	6.844	5.927	5.479	5.933	6.39	5.99	5.728	6.682	7.077	7.829	6.407	6.72	6.413	7.14	6.627	7.063	7.516	6.821	6.891	6.104	7.206	6.203	6.692	6.644	6.018	7.887	7.253	7.774	7.47	7.122	6.259
SHMT1P1	SHMT1P1	6471	1	44315092	44317615	1p34			5.721	6.254	6.162	6.16	5.679	5.461	5.343		6.327	5.817	6.038	4.843	5.75	5.579	5.332	5.749	5.763	5.757	5.81	6.06	6.183	6.156	5.676	5.461	5.707	5.565	5.154	4.89	5.773	4.996	5.361	5.987	5.39	5.889	5.255	5.806	5.784	5.801	5.772	5.366	5.474
ARTN	ARTN	9048	1	44398991	44402912	1p33-p32	NM_001136215.1	NP_001129687.1	4.731	5.374	4.733	5.026	5.698						4.45	4.45	4.644	4.933	4.66			4.705		4.455							4.483							4.671		4.5		5.571		5.141	7.676
IPO13	IPO13	9670	1	44412477	44433694	1p34.1	NM_014652.3	NP_055467.3	7.047	6.92	7.612	7.815	7.743	7.582	8.216	5.324	7.724	8.206	8.056	6.982	7.596	7.118	7.419	6.856	6.781	7.079	7.284	7.327	7.461	7.388	7.549	7.662	7.655	7.927	8.046	7.445	7.678	7.543	8.583	8.256	7.583	7.452	6.62	8.665	7.349	7.669	7.611	7.512	7.547
DPH2	DPH2	1802	1	44435652	44439043	1p34	NM_001384.4	NP_001034678.1	7.084	7.118	7.166	7.894	7.136	7.563	7.551	6.049	7.392	7.239	7.613	7.549	7.814	7.842	7.977	7.868	7.079	7.666	7.535	8.442	8.323	7.843	8.167	7.986	7.963	7.172	8.092	8.394	7.756	7.117	8.023	7.899	8.447	8.037	7.097	8.506	7.816	6.851	7.337	7.825	7.111
ATP6V0B	ATP6V0B	533	1	44440319	44443972	1p32.3	NM_001039457.1	NP_001034546.1	8.493	8.697	8.988	9.926	9.276	9.559	9.791	9.135	9.705	9.234	9.903	9.927	9.277	9.081	9.458	9.137	9.43	9.01	9.039	10.113	9.998	8.961	10.408	9.751	9.441	9.454	9.893	10.059	9.875	9.725	10.763	9.974	9.249	9.27	8.279	10.62	9.341	8.913	9.102	9.48	9.051
B4GALT2	B4GALT2	8704	1	44444873	44456843	1p34-p33	NM_001005417.2	NP_001005417.1	8.595	8.55	9.754	9.167	8.317	9.336	9.037	6.476	8.738	9.243	8.972	8.167	8.323	8.977	8.796	8.909	8.12	8.195	6.683	8.522	8.588	6.86	8.555	8.692	9.137	8.227	8.974	8.221	8.443	8.491	8.95	9.022	8.615	8.692	8.369	9.931	8.593	8.399	8.911	8.71	8.246
CCDC24	CCDC24	149473	1	44457279	44462198	1p34.1	NM_152499.1	NP_689712.1	6.157	5.358	5.816	5.9	6.356	5.314	5.799		5.396	5.628	5.898	5.737	6.157	6.561	6.649	6.033	5.69	5.858	5.051	4.925	5.328	4.893	5.449	5.971	6.042	5.89	5.625	6.32	6.036	5.563	6.027	5.749	5.449	5.301	5.941	6.986	5.916	5.738	5.852	6.131	6.515
SLC6A9	SLC6A9	6536	1	44462154	44497164	1p33	NM_201649.3	NP_008865.2	7.608	7.688	8.866	9.001	7.371	6.647	8.198		7.172	7.519	7.591	7.251	6.459	7.264	7.879	6.496	7.55	7.987	6.637	6.586	7.407	6.776	7.267	6.173	6.458	6.177	8.006	6.08	6.007	6.241	6.106	6.107	7.125	7.333	6.986	8.636	7.107	6.855	7.816	7.229	7.287
KRT8P47	KRT8P47	644743	1	44568811	44570376	1p34.1			10.296	8.708	7.921	8.477	10.298	7.823	7.591		8.125	7.564	8.397	10	9.611	9.374	9.583	10.101	10.111	9.926	7.48	7.377	8.576	7.288	7.254	6.792	7.048	6.84	7.085	7.287	7.3	7.604	7.057	7.344	6.984	7.368	10.054	9.609	9.326	8.287	10.147	7.717	9.983
KLF17	KLF17	128209	1	44584521	44600809	1p34.1	NM_173484.3	NP_775755.3		5.091	6.244	6.272			5.326		4.594	5.531	4.572		4.493				4.556				4.561				5.189			4.809	4.496	4.65	4.867	4.662		4.552	4.44	6.281	4.457	4.47	5.529
DMAP1	DMAP1	55929	1	44679124	44686351	1p34	NM_019100.4	NP_001029196.1	7.641	7.636	7.519	8.37	8.065	8.805	8.312	6.689	8.388	8.091	8.29	8.312	8.009	7.961	8.37	7.995	7.886	8.14	8.269	7.99	7.878	8.312	8.185	8.312	7.813	8.004	8.591	8.018	7.748	7.113	8.586	7.825	8.059	7.886	7.23	8.985	8.178	7.651	8.175	7.867	8.096
ERI3	ERI3	79033	1	44686741	44820951	1p32	NM_024066.1	NP_076971.1	7.988	7.838	8.299	8.778	8.02	8.648	8.738	6.939	8.683	8.92	8.774	8.378	8.327	8.468	8.412	8.424	8.429	8.232	8.11	8.279	8.159	8.189	8.35	8.206	8.611	8.049	9.068	8.417	8.642	7.971	8.839	8.758	8.255	8.234	7.915	9.362	8.577	8.286	8.427	8.819	8.327
ERI3-IT1	ERI3-IT1	100874278	1	44688266	44709955				4.561		4.526	4.794		4.618			4.758	5.264	4.909			4.785	4.825	5.139			4.572			4.688	4.864	5.348			5.235	4.654	4.951		5.898	5.031	4.589			4.964	5.035	4.788	4.688	5.115
RNF220	RNF220	55182	1	44870959	45117396	1p34.1	NM_018150.2	NP_060620.2	8.479	8.79	9.046	9.023	8.266	9.233	8.798	7.766	9.2	9.053	9.058	9.336	9.084	9.048	9.429	9.4	9.156	9.303	9.009	9.603	8.982	9.411	9.133	9.164	9.34	8.832	9.285	9.024	9.099	8.825	9.115	8.756	8.92	8.845	8.274	9.282	8.952	8.453	8.908	8.969	8.558
TMEM53	TMEM53	79639	1	45118918	45140280	1p34.1	NM_024587.2	NP_078863.2	6.102	6.434	6.183	6.597	6.197	6.414	6.926	5.15	6.45	6.137	6.791	7.924	6.788	6.818	6.435	7.15	6.878	7.055	6.277	6.221	5.976	5.988	7.286	6.526	6.512	7.444	7.222	7.817	7.237	7.697	7.695	6.925	7.134	7.413	6.403	7.146	7.092	6.988	6.414	6.633	6.664
C1orf228	C1orf228	339541	1	45140393	45191263	1p34.1	NM_001145636.1	NP_001139108.1	4.752	4.831	4.91	4.808	4.691	4.512	4.742		4.769	4.679	4.884	4.638	4.733	4.588	4.67	4.692	4.813	4.644	8.388	8.306	4.953	8.764	4.952	4.528	4.711	4.483	4.63	4.65	4.744	4.705	4.698	4.848	4.615	5.101	4.845	4.87	4.838	4.872	4.869	5.114	4.766
KIF2C	KIF2C	11004	1	45205489	45233438	1p34.1	NM_006845.3	NP_006836.2	7.905	8.609	8.442	9.115	7.468	9.485	8.357	6.848	9.121	8.781	9.147	8.271	7.982	8.682	8.404	8.391	8.699	8.402	8.516	8.256	8.781	8.32	7.958	9.504	8.156	7.602	8.972	8.175	8.254	7.818	8.797	8.147	8.418	8.314	7.679	8.687	8.631	8.364	7.965	8.37	8.359
SNORD46	SNORD46	94161	1	45242163	45242261	1p34.1			6.892	6.571	6.697	6.872	6.666	6.988	6.595		6.877	6.846	6.549	6.045	7.383	6.922	7.518	7.256	7.019	6.997	6.984	7.824	7.656	7.449	8.105	8.512	7.299	6.841	7.593	7.493	6.703	6.926	7.219	7.285	6.956	6.855	5.976	7.427	7.102	6.221	7.125	7.202	6.239
SNORD38A	SNORD38A	94162	1	45243513	45243584	1p34.1			4.51	5.694	6.073	6.304	6.411	7.205	5.808		5.297	5.787	5.404	5.949	7.179	7.158	7.518	7.255	6.598	6.603	6.696	7.244	6.549	7.037	7.717	8.659	6.561	6.02	7.249	6.203	6.923	5.648	7.259	6.095	6.625	6.031	6.102	6.451	6.32	5.734	6.772	6.955	6.056
RPS15AP11	RPS15AP11	644790	1	45245956	45246416	1p34.1			9.391	8.45	8.416	8.558	8.934	8.675	8.731		8.665	8.119	8.304	9.655	9.269	9.239	9.212	8.996	9.364	8.913	9.006	9.785	8.987	9.161	9.803	9.302	9.508	9.483	8.714	8.885	8.603	8.776	8.801	9.279	9.271	8.757	8.735	8.863	8.533	8.204	8.413	8.923	8.899
BEST4	BEST4	266675	1	45249256	45253426	1p33-p32.3	NM_153274.2	NP_695006.1												4.987						5.326					4.519	5.966															4.437
PLK3	PLK3	1263	1	45265896	45271667	1p34.1	NM_004073.2	NP_004064.2	5.778	6.614	6.51	6.01	5.748	6.612	6.586		6.458	6.353	6.685	6.46	6.909	7.559	6.738	7.042	6.773	6.855	6.592	6.247	6.667	6.726	7.379	8.093	7.17	7.888	6.406	6.908	7.407	6.235	8.123	7.265	6.31	6.344	6.151	6.889	7.18	6.454	7.827	6.676	6.325
BTBD19	BTBD19	149478	1	45274153	45279801	1p34.1	NM_001136537.1	NP_001130009.1	5.529	5.737	6.739	5.793	5.505	5.501	6.088	5.287	6.454	6.44	7.085	5.587	5.807	6.03	5.826	6.569	5.664	6.035	5.747	5.752	5.879	5.703	7.706	5.568	7.228	6.91	5.424	6.938	8.21	5.643	8.047	7.517	5.525	5.755	6.029	5.74	6.717	6.372	7.457	5.571	5.784
PTCH2	PTCH2	8643	1	45285515	45308616	1p34.1	NM_003738.4	NP_003729.3	6.987	7.238	7.305	7.166	7.092	6.769	6.99		7.342	7.19	7.48	6.895	6.953	6.802	6.999	7.111	7.105	7.168	7.385	7.267	7.354	7.222	7.248	6.846	6.802	6.518	6.769	6.917	6.904	7.11	7.105	7.145	7.045	6.932	7.37	7.062	7.301	7.274	7.201	6.986	7.105
EIF2B3	EIF2B3	8891	1	45316193	45452394	1p34.1	NM_001166588.2	NP_001248347.1	6.669	7.041	7.622	7.904	7	7.946	7.956	5.781	7.494	7.497	7.488	7.345	7.61	6.777	7.284	6.903	6.479	7.112	7.574	7.7	8.838	7.586	8.234	7.862	7.561	6.884	7.608	7.139	7.553	6.753	8.152	8.337	6.961	7.124	6.851	7.612	7.665	7.033	7.237	7.351	7.086
MRPS17P1	MRPS17P1	359803	1	45457348	45457924	1p34			5.943	6.095	6.156	6.753	5.501	5.809	6.09		5.742	5.43	5.6	5.732	5.747	5.8	5.937	6.389	5.966	6.12	5.948	6.349	6.052	5.25	5.826	6.223	5.703	5.542	5.556	5.378	5.785	5.569	5.621	5.43	5.905	5.755	5.663	6.6	5.772	5.691	5.782	5.804	5.78
HECTD3	HECTD3	79654	1	45468219	45477027	1p34.1	NM_024602.5	NP_078878.3	6.997	7.331	7.933	7.502	7.676	7.698	8.093	5.465	7.841	8.22	7.823	8.136	8.372	7.663	7.689	7.26	7.462	7.345	7.092	7.529	8.132	7.106	7.399	7.654	8.126	7.588	8.15	7.717	7.934	7.977	8.359	8.085	7.911	7.927	7.104	8.397	7.787	7.466	7.789	6.912	7.066
UROD	UROD	7389	1	45477804	45481341	1p34	NM_000374.4	NP_000365.3	6.56	7.306	7.278	7.363	6.963	7.665	7.446	8.313	7.379	7.646	7.813	6.777	7.071	7.219	7.295	6.52	6.982	7.615	6.833	7.847	9.467	6.964	7.061	8.175	7.792	7.559	8.011	7.71	8.227	7.185	8.021	7.809	7.789	7.618	6.305	7.212	7.472	7.42	7.741	6.724	6.599
ZSWIM5	ZSWIM5	57643	1	45482075	45672250	1p34.1	NM_020883.1	NP_065934.1	6.995	5.407	5.48	5.131	6.326	6.513	5.325		6.267	5.282	6.003	7.271	6.404	5.59	6.858	5.387	5.901	7.027	5.249	5.254	5.395	5.626	5.168	5.794	5.569	5.036	5.136	5.038	5.511	6.672	5.181	5.421	5.173	5.408	5.816	7.706	5.322	5.094	5.864	6.415	6.302
OSTCP5	OSTCP5	100874386	1	45613434	45613883				8.469	8.427	8.793	8.175	8.022	8.272	8.443		8.098	8.365	8.554	8.984	8.606	8.751	8.453	8.371	8.327	7.637	8.685	9.138	8.889	8.601	9.134	8.489	8.464	8.839	8.192	8.768	8.309	8.241	8.353	8.753	8.305	8.213	8.006	8.351	8.88	7.692	7.689	8.624	8.274
HPDL	HPDL	84842	1	45792544	45794346	1p34.1	NM_032756.2	NP_116145.1	4.858											5.787	7.586			5.707		6.956	4.433	7.172		4.468	5.832													4.513				4.71
MUTYH	MUTYH	4595	1	45794913	45806142	1p34.1	NM_001048173.1	NP_036354.1	6.5	6.329	6.318	6.225	6.525	6.66	6.255	4.747	6.522	6.902	6.574	6.784	6.911	7.385	7.123	6.798	7.907	7.468	7.314	6.546	7.083	7.718	7.049	6.707	6.758	6.93	6.995	6.86	6.982	6.102	7.582	6.627	6.727	6.663	6.248	6.919	7.274	6.353	6.008	7.416	6.821
TOE1	TOE1	114034	1	45805341	45809650	1p33	NM_025077.3	NP_079353.3	6.816	7.165	7.311	7.685	7.005	7.775	7.541	5.115	7.348	7.344	7.737	7.534	7.918	7.888	7.935	7.529	7.677	7.612	8.069	8.025	8.358	8.37	7.442	8.065	8.059	7.189	7.965	7.846	7.889	7.435	8.22	7.846	8.03	7.817	7.061	7.86	7.216	6.528	7.627	7.956	7.163
TESK2	TESK2	10420	1	45809554	45956840	1p32	NM_007170.2	NP_009101.2	6.234	5.479	4.968	4.981	6.837	5.475	4.859		5.118	4.626	5.002	6.141	5.642	6.052	5.95	5.797	6.035	5.665	5.705	5.471	5.404	5.838	5.532	4.659	4.737	7.824	7.065	6.163	8.583	8.067	8.533	7.101	6.108	6.094	4.471	5.269	4.938		4.98	5.297	5.036
CCDC163P	CCDC163P	126661	1	45959597	45965751	1p34.1			6.204	5.14	5.396	5.527	5.672	6.344	5.68		5.636	5.39	6.199	6.259	6.484	5.972	7.142	5.151	6.292	5.848	6.291	5.414	6.37	6.585	6.366	6.111	5.226	6.288	5.278	5.85	5.011	5.679	5.692	5.444	4.83	5.493	5.377	6.662	6.293	5.355	5.198	5.573	5.514
MMACHC	MMACHC	25974	1	45965855	45976739	1p34.1	NM_015506.2	NP_056321.2	6.738	5.995	6.124	6.873	6.571	7.084	6.42		6.124	6.424	6.188	7.11	7.333	7.135	7.187	6.296	7.015	6.744	6.712	7.42	6.922	6.428	7.352	6.207	6.16	7.639	6.173	7.515	5.903	6.605	6.989	7.571	6.225	6.781	5.406	7.127	6.317	6.102	5.549	6.355	6.164
PRDX1	PRDX1	5052	1	45976706	45988562	1p34.1	NM_181696.2	NP_859048.1	11.006	10.531	10.921	11.353	10.943	11.238	11.422	11.213	11.968	10.825	11.845	11.445	11.639	11.718	11.44	11.325	11.214	11.107	11.118	10.516	11.293	10.96	11.363	10.074	11.252	11.026	11.355	11.756	11.596	11.085	9.583	10.589			11.804	11.787	11.72	11.217	11.191	11.613	11.751
AKR1A1	AKR1A1	10327	1	46016454	46035723	1p33-p32	NM_006066.3	NP_006057.1	7.473	7.426	8.308	8.514	8.698	8.491	8.658	8.94	8.529	8.387	8.973	9.407	9.072	8.993	9.381	8.821	9.305	9.011	8.723	8.411	8.383	8.972	9.296	8.14	8.86	9.082	8.514	8.879	10.158	7.729	9.045	8.129	8.021	7.803	7.932	8.538	8.249	7.596	8.091	7.545	8.725
NASP	NASP	4678	1	46049659	46084578	1p34.1	NM_152298.3	NP_689511.2	8.119	8.2	7.869	8.432	7.426	8.826	8.368	7.295	8.334	8.196	8.723	8.726	8.291	8.887	8.681	8.811	8.836	8.844	9.474	9.254	9.333	9.726	9.276	9.204	8.527	7.87	8.498	8.413	8.031	8.074	8.642	8.337	8.369	8.34	8.018	8.184	8.218	7.666	7.792	8.593	7.114
CCDC17	CCDC17	149483	1	46085715	46089731	1p34.1	NM_001190182.1	NP_001108410.2	5.551	6.359	5.603	5.832	5.963	5.521	5.538		5.578	5.752	5.629	5.377	6.287	5.868	6.517	6.172	5.462	5.722	6.264	5.624	5.611	5.819	5.761	6.295	5.614	5.408	6.15	5.873	5.708	6.016	6.153	6.022	5.538	5.751	5.414	5.942	5.813	6.121	5.964	5.91	5.836
GPBP1L1	GPBP1L1	60313	1	46092975	46152302	1p34.1	NM_021639.4	NP_067652.1	8.182	7.732	8.174	8.463	7.903	7.918	8.072	7.493	8.125	8.088	8.15	8.664	8.692	8.701	8.683	8.76	8.703	8.312	8.375	8.781	8.662	8.535	8.249	8.647	8.88	8.152	8.449	8.605	8.388	8.035	8.701	8.42	8.024	7.901	7.279	8.434	8.173	7.966	8.554	8.451	8.062
RPS15AP10	RPS15AP10	728963	1	46111451	46112357	1p34.1			6.45	5.858	6.169	5.743	6.457	6.467	6.343		5.6	6.059	5.339	6.174	6.585	6.742	6.791	6.852	6.654	6.151	6.087	6.679	6.091	6.191	6.779	6.871	6.415	6.208	6.472	6.517	6.053	6.162	6.478	6.207	5.945	6.338	5.65	5.827	5.63	5.775	5.708	6.166	6.028
TMEM69	TMEM69	51249	1	46153846	46160108	1p34.1	NM_016486.3	NP_057570.2	7.975	8.711	8.598	8.916	8.668	8.805	8.182	6.497	8.297	8.504	8.427	8.912	9.371	8.978	9.053	9.13	8.978	8.708	8.456	9.398	9.9	8.34	9.536	8.52	9.257	8.866	8.915	9.266	9.049	9.063	9.572	9.278	8.806	8.708	7.747	8.557	8.348	8.693	8.548	8.79	8.593
IPP	IPP	3652	1	46159997	46216485	1p34-p32	NM_005897.2	NP_001138821.1	6.455	5.76	6.957	6.8	6.48	6.829	6.737	6.901	6.732	7.326	7.11	6.772	7.084	7.01	7.371	6.196	6.138	6.128	6.163		6.292	5.971	5.624	6.63	6.413	7.478	6.822	5.684	7.058	5.731	7.194	6.934	5.436	6.31	6.088	7.803	6.734	6.5	6.558	7.424	6.522
MAST2	MAST2	23139	1	46269284	46501796	1p34.1	NM_015112.2	NP_055927.2	7.67	7.907	8.435	8.407	8.015	8.529	8.38	6.325	8.382	8.696	8.244	7.949	8.171	8.34	8.346	8.105	7.997	7.947	7.316	6.813	7.708	7.665	7.459	7.953	7.788	7.856	8.702	7.993	7.922	7.711	8.318	7.979	7.884	7.794	7.593	8.172	8.211	8.043	8.172	7.963	7.634
TMA16P2	TMA16P2	100101407	1	46311009	46313390	1p34.1															4.488	4.61										4.581	4.488			4.431
PIK3R3	PIK3R3	8503	1	46505811	46642167	1p34.1	NM_003629.3	NP_001107644.1	8.167	4.873	6.108	8.51	7.531	6.621	6.89	5.226	6.851	6.791	7.468	6.384	6.499	4.585	6.623	6.813	6.254	5.722	8.1	5.916	5.747	8.511	8.323	5.501	6.132	9.479	6.675	8.919	9.885	5.97	8.802	6.75	5.42	5.728	4.705	7.507	5.596	5.342	6.017	7.421	8.085
TSPAN1	TSPAN1	10103	1	46640748	46651634	1p34.1	NM_005727.3	NP_005718.2	4.739	4.49			6.493	4.533	4.538		4.712		4.901	7.287	7.322	6.066	7.445	10.453	6.452	5.361	4.8		4.435	4.482	4.898		4.559	5.388		5.733	5.449	4.697	5.183	4.646		4.746	4.586	5.159	4.865	4.892	4.662	4.773	10.332
POMGNT1	POMGNT1	55624	1	46654352	46685977	1p34.1	NM_017739.3	NP_060209.3	7.252	8.035	8.433	7.921	7.973	8.556	8.552	6.631	8.533	8.53	8.598	8.068	8.089	8.348	8.181	7.903	7.943	7.628	7.412	6.572	7.686	7.549	7.717	8.191	8.41	8.874	8.899	8.946	9.465	8.256	9.567	8.835	8.95	8.812	7.345	8.894	8.528	8.102	8.233	8.375	8.188
LURAP1	LURAP1	541468	1	46669005	46686928	1p34	NM_001013615.2	NP_001013633.1	5.594	5.819	5.985	6.108	6.272	6.712	5.69		6.262	6.091	5.946	5.168	5.468	5.198	5.427	5.425	5.566	5.815	6.037	5.449	6.008	5.986	5.418	5.743	4.914	8.864	8.259	6.894	7.802	7.386	8.893	7.04	7.815	7.714	5.641	5.599	6.11	6.101	5.741	5.26	5.525
RAD54L	RAD54L	8438	1	46713366	46744145	1p32	NM_003579.3	NP_001136020.1	7.211	7.154	7.082	7.574	6.565	8.007	6.885		7.615	7.483	7.374	6.979	7.564	7.532	7.895	7.894	7.399	7.301	8.201	7.561	7.92	8.167	7.624	7.935	7.49	6.932	7.748	7.666	7.441	6.992	7.931	7.186	7.772	7.501	6.552	7.242	7.499	6.854	6.72	7.725	6.817
LRRC41	LRRC41	10489	1	46744071	46769038	1p34.1	NM_006369.4	NP_006360.3	7.438	7.574	8.326	8.551	8.045	8.735	8.621	7.405	8.458	8.677	8.711	7.523	8.911	7.995	8.649	7.507	7.339	8	8.093	7.736	8.384	8.067	7.88	8.588	8.024	8.401	8.388	8.113	8.614	7.367	9.076	8.809	8.287	8.057	7.531	8.424	7.846	7.98	8.494	7.929	8.086
NSUN4	NSUN4	387338	1	46805848	46830824	1p34	NM_001256127.1	NP_001243057.1	7.496	6.115	7.48	7.987	7.587	7.808	7.697	5.07	7.149	7.485	7.469	8.35	7.815	7.926	7.692	7.48	7.835	8.043	7.69	8.305	8.508	7.828	8.571	7.894	7.984	7.752	8.348	7.926	7.484	7.417	8.586	7.816	7.809	7.902	7.051	8.07	7.422	6.923	7.659	7.841	7.178
FAAH	FAAH	2166	1	46859938	46879520	1p35-p34	NM_001441.2	NP_001432.2	6.613	5.337	5.301	5.583	6.71	5.235	5.756		5.52	5.248	5.671	7.703	7.092	6.706	6.781	6.948	6.551	6.848	5.316	5.599	5.266	5.484	5.493	5.203	5.057	4.963	5.086	5.279	5.198	5.255	5.284	5.349	4.965	5.316	5.41	6.428	5.515	5.266	5.288	5.805	5.325
FAAHP1	FAAHP1	729041	1	46899498	46911374	1p33			5.082	4.843	5.121	5.008	5.433	4.925	4.61		5.165	5.048	5.413	5.016	5.254	5.463	4.819	5.213	5.034	4.983	5.181	5.226	5.264	5.045	5.348	4.684	4.611	4.982	4.845	5.457	4.934	5.601	5.587	5.338	5.035	4.857	5.2	5.985	4.996	5.344	5.145	5.674	5.124
DMBX1	DMBX1	127343	1	46972667	46979886	1p33	NM_147192.2	NP_757379.1	6.863	6.669	6.357	6.387	7.191	6.249	6.785		7.081	6.621	6.926	7.026	6.404	7.051	6.762	7.484	6.85	6.575	6.641	6.626	6.88	6.576	6.585	6.743	6.538	6.193	6.234	6.219	6.547	6.726	6.581	6.34	6.369	6.27	6.87	6.922	6.597	6.528	6.663	6.731	6.983
KNCN	KNCN	148930	1	47011315	47016887	1p33	NM_001097611.1	NP_001091080.1	7.443	7.434	7.48	7.385	7.464	7.15	7.269		7.827	7.3	7.488	7.386	7.537	7.23	7.476	7.569	7.36	7.616	7.541	7.478	7.496	7.736	7.344	7.317	6.87	7.162	7.365	7.201	7.353	7.397	7.464	7.378	7.08	7.206	7.525	7.097	7.648	7.496	7.266	7.182	7.341
MKNK1	MKNK1	8569	1	47023078	47069966	1p33	NM_003684.5	NP_945324.1	7.152	7.15	6.571	7.011	7.775	7.187	6.882	6.018	7.608	7.558	8.119	7.871	7.671	7.721	7.752	7.738	7.519	7.37	7.006	7.76	7.882	6.845	7.526	7.952	6.78	7.561	7.92	7.81	7.598	7.079	7.737	7.161	7.442	7.486	6.705	8.129	7.265	6.736	7.395	7.171	8.103
MOB3C	MOB3C	148932	1	47073386	47082563	1p33	NM_145279.4	NP_660322.2	4.911	5.217	5.204	5.22	5.403	5.461	6.102	5.537	5.666	6.127	6.279	5.961	6.034	5.419	5.737	6.955	5.5	5.079	4.746	4.866	5.122	4.872	5.692	5.853	5.405	5.593	5.983	5.382	5.328	5.368	5.609	5.33	5.815	5.954	4.937	5.662	5.333	5.22	6.266	5.511	6.893
ATPAF1	ATPAF1	64756	1	47100710	47134099	1p33-p32.3	NM_001256418.1	NP_001243347.1	8.113	7.27	7.647	7.516	8.398	8.592	8.1	7.35	8.593	8.211	7.951	8.52	7.616	8.353	8.923	7.907	7.836	7.977	7.752	7.794	7.114	7.961	8.341	5.761	7.447	8.193	8.237	8.053	8.126	8.01	8.47	7.964	7.807	7.658	7.521	8.318	7.847	7.421	8.319	7.834	7.665
TEX38	TEX38	374973	1	47137504	47139256	1p33	NM_001145474.2	NP_001138946.1											5.079										4.442		4.785													4.539			4.782
EFCAB14	EFCAB14	9813	1	47140830	47184736	1p33	NM_014774.2	NP_055589.1	7.996	8.047	8.721	8.533	8.77	8.532	8.723	8.006	8.378	9.071	8.395	9.028	8.754	8.637	9.143	9.191	8.601	8.113	8.004	8.255	7.793	8.209	8.403	8.712	8.656	9.005	9.058	8.799	9.189	8.197	9.029	8.504	8.174	7.884	7.866	9.132	8.476	8.86	8.854	8.726	8.872
CYP4B1	CYP4B1	1580	1	47264669	47285021	1p34-p12	NM_001099772.1	NP_001093242.1																																									6.715
CYP4Z2P	CYP4Z2P	163720	1	47308766	47366147	1p33							7.088
CYP4X1	CYP4X1	260293	1	47489239	47516423	1p33|1	NM_178033.1	NP_828847.1					6.997
CYP4Z1	CYP4Z1	199974	1	47533159	47583992	1p33	NM_178134.2	NP_835235.1	4.501				5.006
LINC00853	LINC00853	100874253	1	47644921	47646011					4.456	4.84		4.823				4.574			4.572			4.494	4.897				4.44	4.497		4.909	4.512		4.637					4.638	4.532	5.161	4.668		6.388
PDZK1IP1	PDZK1IP1	10158	1	47649260	47655771	1p33	NM_005764.3	NP_005755.1	4.524	4.794							4.428		4.433	4.731	6.524		5.8	6.856	4.421		4.438															4.841	5.112	7.494		5.66	6.62	4.516
TAL1	TAL1	6886	1	47681961	47698007	1p32	NM_003189.2	NP_003180.1																			6.917		7.691	6.398
STIL	STIL	6491	1	47715810	47779819	1p32	NM_003035.2	NP_003026.2	7.665	8.009	7.88	8.48	7.091	8.861	8.245	7.566	8.507	8.399	7.996	8.104	8.477	8.56	8.681	8.319	8.079	7.62	6.837	7.753	8.162	7.925	7.73	8.437	8.243	7.425	8.606	7.632	7.983	7.621	8.443	7.681	7.777	7.498	7.327	8.109	8.034	7.577	7.78	8.274	7.734
CMPK1	CMPK1	51727	1	47799468	47844511	1p32	NM_016308.2	NP_001129612.1	8.018	8.942	9.571	9.342	8.079	9.635	9.416	9.381	9.501	9.733	9.572	10.236	10.114	8.939	8.771	9.322	9.079	8.396	8.897	9.462	9.681	9.202	9.312	9.453	9.178	8.581	9.412	9.123	9.106	8.342	9.526	9.226	8.764	8.442	8.717	9.261	8.994	9.041	9.392	8.999	8.725
FOXD2-AS1	FOXD2-AS1	84793	1	47897806	47900313	1p33			5.096	5.19	4.989	4.664	5.34	5.562	5.165		5.365	5.932	5.452	5.34	5.955	5.635	5.125	4.904	5.219	5.171	6.228	5.984	6.667	5.285	4.693	6.708	5.874	5.684	6.733	7.187	5.926	5.749	5.655	6.906	6.257	5.934	5.655	6.054	5.724	4.909	5.452	5.714	4.639
FOXD2	FOXD2	2306	1	47901688	47906363	1p34-p32	NM_004474.3	NP_004465.3	5.756	4.966	5.196	5.235	6.323	5.557	5.226		5.126	5.693	4.652	5.746		5.149	4.436	5.151	5.132		4.807	5.54	4.742	4.528	4.837	4.838	4.876	5.613	6.853	5.707	5.719	5.363	5.247	6.082	6.046	6.201	4.488	5.859	4.982	5.353	5.166	5.446
TRABD2B	TRABD2B	388630	1	48226199	48462562	1p33	NM_001194986.1	NP_001181915.1										6.203																										4.516
SKINTL	SKINTL	391037	1	48567386	48648100	1p33					4.599																																	4.435		4.589
SLC5A9	SLC5A9	200010	1	48688356	48714316	1p33	NM_001011547.2	NP_001128653.1	6.536	6.703	6.693	6.319	6.229	5.888	6.338		6.643	6.572	6.528	6.418	6.392	6.243	6.37	6.505	6.6	6.254	6.577	6.621	6.558	6.534	6.222	6.18	6.188	6.177	6.151	6.256	6.343	6.381	6.211	6.433	6.085	6.299	6.536	6.766	6.513	6.262	6.192	6.057	6.445
SPATA6	SPATA6	54558	1	48761043	48937880	1p33	NM_019073.2	NP_061946.1	4.45		4.557	5.037	5.153		5.27		5.478	6.648	5.469	4.507	4.494	5.248	5.035		4.534	4.837					4.497	5.36	4.716	6.142	5.932	6.44	5.64	6.066	6.425	6.686	6.415	6.724	4.58	5.31	4.515			5.405
PPP1R8P1	PPP1R8P1	5512	1	48790645	48791817	1p33									4.645			5.106																4.437	4.88	5.015			4.454		5.277	4.801
AGBL4	AGBL4	84871	1	48998526	50489626	1p33	NM_032785.3	NP_116174.3																												4.756												4.485
BEND5	BEND5	79656	1	49193194	49242641	1p33	NM_024603.2	NP_078879.2									4.772	4.991	4.486								5.597			5.945							4.688		4.457
ZNF859P	ZNF859P	100507490	1	50307929	50312071	1p33			6.248	6.326	6.473	6.531	5.999	6.688	6.052		6.724	6.316	6.184	6.106	5.886	6.135	6.204	6.099	6.099	5.892	6.189	6.053	6.401	6.478	6.029	5.85	6.133	5.852	6.021	6.598	5.915	5.868	6.495	6.508	6.103	6.196	5.521	5.86	6.362	6.203	6.308	5.993	6.126
DMRTA2	DMRTA2	63950	1	50883222	50889119	1p32.3	NM_032110.2	NP_115486.1			4.457	5.05		7.432	5.24	5.125	4.509	4.505	4.522	5.441	5.972		6.374					4.439	4.532		4.518	5.45	4.629	4.59			4.451	4.495	4.652	4.454	5.158	5.768		4.53	4.679		4.433	4.74
FAF1	FAF1	11124	1	50906934	51425936	1p33	NM_007051.2	NP_008982.1	5.915	6.803	7.404	7.382	6.813	7.887	7.255	7.841		7.382		7.269	7.418	7.258	7.713	7.406	7.067	7.313	7.728	7.54	7.677	7.253		7.474	7.93	7.174	7.69	7.762	7.619	7.219	8.175	7.079	7.345	7.183	6.39	7.658	7.142	6.708	6.93	7.132	6.945
CDKN2C	CDKN2C	1031	1	51434366	51440309	1p32	NM_078626.2	NP_523240.1	6.74	7.528	7.738	9.361	6.754	8.905	8.526	8.404	4.621	9.71	4.468	6.17	5.446	5.815	6.67	5.638	6.634	5.921	8.874	7.547	7.5	7.685	4.803	5.376	7.155	7.246	7.458	6.826	7.173	5.89	7.14	6.672	6.673	7.202	6.759	7.216	6.611	7.341	6.684	6.142	6.715
C1orf185	C1orf185	284546	1	51567905	51613754	1p32.3	NM_001136508.1	NP_001129980.1										4.43
CFL1P2	CFL1P2	391039	1	51623316	51624211	1p32.3			9.85	10.01	10.014	10.116	9.699	9.965	9.904		9.769	9.64	9.571	9.544	9.445	9.748	9.307	9.88	9.608	9.801	9.784	9.788	9.53	9.693	10	10.334	10.047	9.055	9.682	9.657	9.364	9.638	9.566	9.518	10.39	10.097	9.767	10.084	9.743	9.471	9.954	9.846	9.685
RNF11	RNF11	26994	1	51701944	51739119	1p32	NM_014372.4	NP_055187.1	8.083	8.313	9.479	8.964	8.317	9.478	9.167	9.494	8.794	8.996	8.914	7.681	7.791	8.363	8.116	7.687	7.715	6.96	7.442	6.758	6.799	7.249	7.535	7.157	8.815	7.962	8.459	8.39	8.606	7.843	8.481	8.314	7.758	7.47	7.155	9.169	8.64	8.649	8.973	8.418	8.44
TTC39A	TTC39A	22996	1	51752929	51810788	1p32.3	NM_001144832.1	NP_001073963.1	8.173	4.943	4.898	4.855	9.394	4.68	4.873		5.141	4.766	5.25	7.739	7.138	6.784	6.652	6.919	5.492	5.944	5.075	4.91	5.055	4.898	5.683	4.56	4.661	5.27	4.913	5.588	5.558	5.233	7.622	5.067	4.758	4.982	5.652	6.809	5.133	5.738	4.87	5.307	6.297
EPS15	EPS15	2060	1	51819934	51984995	1p32	NM_001981.2	NP_001153441.1	8.426	8.569	8.449	8.261	8.168	9.176	8.688	8.301	8.79	8.864	8.601	8.64	8.655	8.675	8.462	8.551	8.376	8.135	8.528	8.816	9.068	8.182	8.196	8.49	8.867	8.948	9.174	9.097	8.992	9.03	9.87	8.855	8.821	8.372	7.863	9.32	8.954	8.737	8.703	8.21	9.011
OSBPL9	OSBPL9	114883	1	52082545	52254891	1p32.3	NM_148907.2	NP_078862.4	9.029	8.401	7.958	8.434	8.704	9.107	8.802	8.078	8.956	8.095	8.763	8.402	9.385	8.779	8.968	8.787	9.101	8.61	8.441	8.924	9.597	7.259	9.486	8.707	8.965	9.388	9.637	9.253	9.798	9.316	10.14	9.013	8.451	8.137	8.287	9.455	9.086	8.906	8.848	8.803	9.352
SLC25A6P3	SLC25A6P3	100422686	1	52174754	52175610				7.008	7.124	7.259	7.029	6.596	6.382	6.358		7.016	6.753	7.363	6.561	6.64	6.466	6.474	6.754	7.004	6.746	7.104	7.063	7.273	7.197	6.897	6.263	6.488	6.208	6.396	6.763	6.601	6.493	6.647	6.791	6.646	6.484	6.978	6.819	6.928	7.139	7.101	6.828	7.108
NRDC	NRDC	4898	1	52254865	52344609	1p32.2-p32.1	NM_001242361.1	NP_001229290.1	8.145	7.991	8.833	9.135	8.26	9.188	8.678	9.519	8.679	9.092	8.953	8.254	8.488	8.771	7.877	8.14	7.727	7.855	8.501	8.624	8.932	8.294	8.952	9.024	8.748	8.447	8.992	8.839	8.62	8.612	8.835	8.876	8.021	8.098	7.928	9.749	8.557	8.518	9.147	9.377	8.668
RAB3B	RAB3B	5865	1	52373627	52456436	1p32-p31	NM_002867.3	NP_002858.2			4.908	6.136		6.578	4.607		4.501	4.453	4.546			5.719																					4.967	4.51	6.709	5.445	6.921
TXNDC12	TXNDC12	51060	1	52485803	52521843	1p32.3	NM_015913.3	NP_056997.1	9.026	9.216	9.522	10.158	9.266	9.739	10.336	10.639	9.918	10.038	10.134	10.176	9.88	10.302	10.071	9.696	10.242	9.993	9.399	9.8	9.517	9.174	10.061	9.883	9.869	9.875	9.988	10.007	9.919	9.371	10.153	9.992	9.978	9.767	9.591	10.538	9.606	9.89	9.929	10.444	9.461
BTF3L4	BTF3L4	91408	1	52521856	52556388	1p32.3	NM_001136497.2	NP_001129969.1	8.229	8.011	8.45	8.813	8.436	8.923	8.284	7.605	8.632	8.348	8.549	8.209	7.525	8.608	8.712	8.511	7.956	8.242	8.24	8.723	8.114	8.193	8.546	8.067	8.405	7.878	8.085	8.425	7.801	7.422	8.081	7.769	7.724	7.232	7.096	9.042	8.152	7.947	8.86	8.618	8.079
ZFYVE9	ZFYVE9	9372	1	52607765	52812358	1p32.3	NM_007323.1	NP_015563.2	6.1	6.757	7.079	6.45	6.517	7.719	6.823	4.532	6.478	7.179	6.488	5.874	6.8	7.316	7.303	6.545	6.501	6.423	6.225	5.819	6.08	6.176	5.741		7.087	7.384	7.218	7.066	7.276	6.483	7.397	7.128	6.632	6.49	5.749	8.071	6.593	6.339	7.866	6.585	6.576
PDCL3P6	PDCL3P6	100419023	1	52645486	52646365				6.275	5.76	6.021	5.887	5.472	6.3	5.803		6.388	5.426	6.181	5.611	5.857	6.04	5.698	5.58	5.017	5.707	5.826	5.814	5.449	5.731	5.643	6.041	6.419	6.367	6.338	6.641	6.712	6.141	6.958	6.268	6.464	6.386	5.391	5.922	5.638	5.463	5.823	6.091	5.596
CC2D1B	CC2D1B	200014	1	52816264	52831877	1p32.3	NM_032449.2	NP_115825.1	6.528	6.916	6.714	7.071	6.719	7.529	7.111		7.28	7.273	7.578	6.504	7.43	6.923	7.097	7.215	6.78	6.6	6.897	6.594	7.056	7.08	6.808	7.418	7.209	7.871	7.898	7.354	7.429	7.388	8.527	7.668	7.371	7.237	6.606	7.856	7.435	7.193	7.177	7.094	6.906
ORC1	ORC1	4998	1	52838500	52870143	1p32	NM_004153.3	NP_001177747.1	7.267	6.861	6.89	7.602	6.775	7.905	7.681		7.624	7.162	8.019	7.89	7.966	7.977	8.004	7.987	7.86	7.779	8.357	8.439	8.709	7.908	8.294	8.312	7.721	7.174	7.804	7.675	7.441	7.462	7.959	7.611	7.786	7.592	7.397	7.957	7.264	6.43	6.721	8.056	7.075
PRPF38A	PRPF38A	84950	1	52870218	52883992	1p32.3	NM_032864.3	NP_116253.2	7.12	6.573	7.132	7.564	6.99	7.48	7.366	6.602	7.785	7.591	7.549	8.24	7.38	7.708	7.893	7.764	7.755	8.056	8.558	8.416	8.385	8.208	8.337	8.142	7.659	6.885	7.9	7.392	7.051	6.451	7.573	7.099	7.73	7.388	6.527	7.956	7.55	6.787	6.783	7.728	7.035
ZCCHC11	ZCCHC11	23318	1	52888947	53018762	1p32.3	NM_015269.2	NP_056084.1		6.988	7.009	7.612	7.059	7.998	6.99	6.187	7.19	7.483	6.964	6.497	7.057	7.9	7.951	6.98	6.948	7.505	7.994	7.274	7.089	7.9	7.626	7.514	7.639	7.395	7.321	6.856	7.01	7.317	7.921	6.942	7.116	6.764	6.714	8.393	7.327	6.767	7.08	7.657	7.337
GPX7	GPX7	2882	1	53068042	53074723	1p32	NM_015696.4	NP_056511.2		4.594	7.051	5.018		5.206		5.326		5.821	5.208							5.535	8.493			4.944	8.681	4.633												6.415	5.322			6.339
FAM159A	FAM159A	348378	1	53099065	53122737	1p32.3	NM_001042693.1	NP_001036158.1																							5.142
COA7	COA7	65260	1	53152013	53164038	1p32.3	NM_023077.2	NP_075565.2	6.901	6.331	6.959	7.763	7.012	7.748	7.204	5.063	6.322	6.656	6.716	7.795	8.009	7.592	7.428	7.344	7.104	7.364	6.761	7.867	8.299	6.925	8.364	7.272	7.932	6.95	7.618	7.492	7.328	7.253	7.766	7.775	7.256	7.102	6.566	7.812	7.256	6.483	6.7	7.43	6.817
ZYG11B	ZYG11B	79699	1	53192130	53293013	1p32.3	NM_024646.2	NP_078922.1	6.888	7.28	8.091	7.231	7.265	8.643	8.008	7.064	8.011	8.09	7.957	6.801	7.731	7.795	8.346	6.407	7.027	7.283	6.987	6.387	7.476	6.134	7.218	7.397	6.932	7.608	8.286	7.915	7.813	7.722	8.3	7.95	7.79	7.524	7.226	8.821	7.757	7.672	7.67	8.008	7.153
ZYG11A	ZYG11A	440590	1	53308182	53360247	1p32.3	NM_001004339.2	NP_001004339.2	6.753	5.78		7.025	6.712																7.369		7.056	7.721			6.836		5.216	4.978			5.866	5.818	5.658	5.871	7.091	6.006		7.156
ECHDC2	ECHDC2	55268	1	53361581	53387446	1p32.3	NM_018281.3	NP_060751.2	6.329	6.074	6.209	5.923	6.348	4.768	4.65	4.859	5.029	5.799	6.302	6.555	6.757	6.069	4.755	5.717	4.727	5.296	5.697	5.617	4.773	5.033	4.882	5.113	4.778	4.731	5.275	4.497	4.768	4.9	4.638	4.63	4.807	5.269	5.372	7.205	5.986	5.959	5.893	6.583	6.019
SCP2	SCP2	6342	1	53392900	53517289	1p32	NM_001193617.1	NP_001180528.1	7.37	7.709	8.738	7.312	8.397	8.443	7.524		4.99	8.376	7.658	8.532	8.538	7.466	7.704	7.129	8.386	7.158	8.419	8.184	7.291	7.596	7.015	4.674	7.435	7.769	7.866	4.51	7.64	8.26	8.694	7.685	7.191	7.144	7.42	9.397	8.239	7.95	7.584	8.108	6.585
PODN	PODN	127435	1	53527723	53551174	1p32.3	NM_001199081.1	NP_001186010.1	4.65	4.898	7.423	4.944	4.803	4.897	5.069		5.053	5.142	4.878	4.8	5.012	4.779	4.68	4.92	5.085	4.913	6.637	4.896	5.039	4.883	4.805	4.867	4.985	4.919	5.046	4.914	4.859	5.018	5.768	5.047	4.99	5.092	5.092	5.058	6.319	5.059	5.221	4.755	4.97
SLC1A7	SLC1A7	6512	1	53552850	53608304	1p32.3	NM_006671.4	NP_006662.3			4.68																																		6.771	4.475
CPT2	CPT2	1376	1	53662100	53679869	1p32	NM_000098.2	NP_000089.1	7.059	5.683	6.43	6.31	7.51	6.578	6.784	5.878	6.68	6.661	7.096	7.775	7.991	6.855	7.439	7.391	7.727	7.191	6.577	6.756	6.57	6.119	7.363	6.776	6.121	7.455	7.023	6.815	7.113	6.804	7.711	6.99	6.777	6.417	6.104	7.345	7.098	6.346	6.295	7.191	6.152
C1orf123	C1orf123	54987	1	53679771	53686311	1p32.3	NM_017887.1	NP_060357.1	8.384	8.227	8.52	8.143	8.328	8.802	8.842	5.578	8.691	8.831	8.586	8.67	8.509	8.584	8.572	8.67	7.938	8.48	8.637	8.639	8.803	9.14	8.139	9.028	8.512	8.6	8.943	8.825	8.408	8.008	8.687	8.453	8.432	8.029	8.225	8.921	8.849	8.019	8.232	8.726	8.35
LOC100507564	LOC100507564	100507564	1	53704281	53708455				4.554					4.689							4.51		4.61																			4.885		5.285				5.988	4.815
LRP8	LRP8	7804	1	53708040	53793821	1p34	NM_033300.3	NP_004622.2	6.939	7.186	7.353	7.303	6.657	7.848	8.383	5.111	8.212	7.956	8.298	7.946	8.389	7.791	7.659	8.606	7.735	7.648	7.816	8.016	7.009	7.921	8.114	8.383	7.498	8.222	9.382	7.856	8.323	7.339	8.615	7.891	7.967	7.765	7.572	8.444	7.98	7.7	7.819	7.549	7.776
SLC25A3P1	SLC25A3P1	163742	1	53904042	53905693	1p32.3			5.526	5.78	5.504	5.605	5.543	5.187	5.317		5.599	5.148	5.679	5.682	5.287	5.119	5.231	5.51	5.594	5.246	5.632	5.576	5.405	5.724	5.813	4.999	5.363	4.989	5.511	5.657	5.663	5.691	5.32	5.921	4.97	5.745	5.791	5.628	5.615	5.668	5.696	5.39	5.51
GLIS1	GLIS1	148979	1	53971905	54199877	1p32.3	NM_147193.2	NP_671726.2	5.285	5.312	6.526	5.769	5.083	5.607	5.783		5.345	6.685	5.477	5.283	5.291	5.113	5.185	5.148	5.315	5.224	5.251	5.312	5.309	5.118	5.2	5.083	5.261	5.212	5.243	5.225	5.284	5.145	5.301	5.434	5.293	5.564	5.213	5.258	5.406	5.208	5.269	5.852	5.255
NDC1	NDC1	55706	1	54231133	54304225	1p32.3	NM_001168551.1	NP_001162023.1	8.337	8.637	8.573	9.108	9	9.512	8.679	6.246	8.777	8.2	8.519	9.543	9.221	9.137	9.501	9.067	9.25	8.87	8.833	9.321	9.033	8.419	9.498	8.818	9.323	8.124	8.892	8.56	8.609	8.304	9.075	8.701	8.593	8.156	8.342	9.567	8.975	8.252	8.452	9.293	8.923
YIPF1	YIPF1	54432	1	54317391	54355487	1p33-p32.1	NM_018982.4	NP_061855.1	6.617	6.527	6.623	6.577	8.197	7.126	7.273	5.56	6.765	6.828	6.706	7.057	6.67	6.886	6.493	6.341	6.07	6.645	6.432	6.565	6.504	6.488	6.905	7.891	7.676	6.951	7.623	7.377	7.376	6.686	7.522	7.122	6.985	6.79	5.993	7.599	6.822	6.767	6.975	6.673	6.357
DIO1	DIO1	1733	1	54359860	54376759	1p33-p32	NM_001039715.1	NP_001034805.1
HSPB11	HSPB11	51668	1	54387233	54411981	1p32	NM_016126.2	NP_057210.2	6.038	7.422	7.242	7.598	8.468	8.024	7.557	9.555	7.829	8.006	7.741	6.351	6.804	7.689	7.983	7.668	6.797	6.665	8.256	6.69	7.911	7.728	7.006	8.069	7.319	7.161	8.248	7.589	7.724	6.372	7.83	7.079	7.2	6.871	6.553	7.328	7.365	7.301	7.218	7.246	8.032
LRRC42	LRRC42	115353	1	54411998	54433841	1p33-p32.1	NM_001256409.1	NP_443172.1	6.759	7.436	7.626	7.64	7.544	8.149	7.216	7.029	7.244	7.433	7.145	7.133	8.227	8.319	8.235	8.15	7.765	7.199	7.021	5.945	7.462	6.949	6.726	7.657	7.942	7.402	7.303	7.528	7.411	6.934	7.361	7.184	7.067	6.962	6.64	7.985	7.505	6.785	7.808	7.765	7.765
LDLRAD1	LDLRAD1	388633	1	54472970	54483859	1p32.3	NM_001010978.3	NP_001010978.2
TMEM59	TMEM59	9528	1	54492353	54519246	1p32.3	NM_004872.3	NP_004863.2	8.558	8.647	9.563	9.205	9.743	9.148	9.661	10.236	9.371	10.215	8.973	10.114	9.729	8.804	9.53	9.716	10.003	8.835	8.474	8.964	8.722	8.008	10.063	9.255	9.32	10.056	9.697	9.582	9.645	8.635	10.088	9.386	9.102	8.599	7.781	10.258	9.006	9.219	9.795	8.745	9.079
TCEANC2	TCEANC2	127428	1	54519244	54578192	1p32.3	NM_153035.1	NP_694580.1	6.719	6.449	7.086	7.136	6.939	7.346	7.398		6.655	7.598	6.725	7.886	7.576	7.043	7.17	6.947	7.109	6.686	7.487	7.086	7.096	7.179	7.198	7.366	7.744	7.56	7.357	7.515	7.424	6.692	7.964	7.292	7.658	7.488	6.333	7.454	6.964	6.666	6.747	7.349	6.566
CYB5RL	CYB5RL	606495	1	54638026	54665746	1p32.3	NM_001031672.2	NP_001026842.2	7.097	6.308	6.227	6.717	7.057	7.399	6.965		7.042	6.672	6.904	7.53	6.994	7.384	7.354	6.561	6.974	7.203	6.888	7.259	7.426	6.988	7.507	6.77	6.857	7.052	7.197	6.879	6.929	6.876	7.747	6.534	6.876	6.635	6.773	6.969	7.057	6.58	6.279	7	7.024
MRPL37	MRPL37	51253	1	54665839	54684056	1p32.1	NM_016491.3	NP_057575.2	9.865	9.417	9.771	10.317	9.604	10.426	10.187	9.785	10.396	10.232	10.475	10.655	10.321	10.047	10.19	10.107	10.343	10.242	10.087	10.378	10.479	9.992	10.191	9.926	10.355	9.761	10.589	10.095	10.608	9.963	10.779	10.497	9.925	9.768	9.355	10.355	10.302	9.616	9.825	9.988	9.937
SSBP3	SSBP3	23648	1	54691103	54872068	1p32.3	NM_145716.3	NP_663768.1	7.045	5.568	5.572	6.438	6.45	6.019	6.513	5.573	6.198	7.695	6.74	8.371	6.648	6.994	6.485	6.172	6.722	7.003	7.662	7.108	7.736	8.15	7.134	6.897	8.005	5.883	7.451	6.838	6.293	6.21	6.808	7.02	6.802	6.533	5.483	7.603	7.178	5.887	5.346	7	6.061
C1orf191	C1orf191	619518	1	54703715	54704735	1p32.3												4.69								4.447	5.101			5.14					4.96
HNRNPA1P63	HNRNPA1P63	645436	1	55002468	55003427	1p32.3			5.532	5.71	4.958	5.112	4.984	5.842	5.232		5.206	4.586	4.847	6.117	5.542	6.053	5.696	5.528	5.806	5.919	5.938	6.312	5.549	6.111	6.662	6.258	5.724	5.371	5.4	6.062	5.322	5.289	5.463	5.712	5.768	5.45	5.256	5.058	5.271	5.131	5.535	5.638	5.243
ACOT11	ACOT11	26027	1	55013806	55100417	1p32.3	NM_147161.3	NP_671517.1	5.312	5.143	5.212	5.305	5.335	5.229	5.549		5.447	5.428	5.745	7.503	7.114	7.049	6.391	7.24	6.309	6.031	5.395	6.443	5.433	5.363	5.288	5.578	6.069	6.352	5.109	5.625	5.627	5.677	5.356	5.211	5.55	5.941	5.664	6.323	5.518	5.316	5.319	6.054	6.011
FAM151A	FAM151A	338094	1	55074849	55089200		NM_176782.2	NP_788954.2	7.495	7.423	7.434	7.575	7.348	7.011	7.53		7.629	7.331	7.674	7.287	7.325	7.209	7.188	7.491	7.4	7.536	7.793	7.462	7.583	7.284	7.736	6.969	7.088	6.725	7.154	7.117	7.338	7.205	7.212	7.652	6.927	7.369	7.798	7.438	7.562	7.623	7.512	7.381	7.826
MROH7	MROH7	374977	1	55107412	55175940	1p32.3	NM_001039464.2	NP_001034553.2	5.332	5.5	5.876	5.844	5.502	5.396	5.507		5.838	5.468	5.78	5.479	5.477	5.238	5.533	5.523	5.35	5.34	5.762	5.8	6.102	5.73	5.804	5.143	5.17	4.974	5.317	5.298	5.3	5.652	5.491	5.578	5.485	5.653	5.856	5.447	5.814	5.75	5.803	5.44	5.349
TTC4	TTC4	7268	1	55181494	55208328	1p32.3	NM_004623.4	NP_004614.3	6.301	7.213	7.198	7.303	7.119	7.749	7.589	6.217	7.353	7.156	7.771	7.283	7.391	7.407	7.203	7.236	7.169	6.981	7.438	7.366	8.103	7.37	7.356	7.677	7.754	6.798	7.481	7.189	7.355	7.138	7.695	7.369	6.954	7.262	7.123	7.822	8.032	6.902	7.602	8.29	7.101
PARS2	PARS2	25973	1	55222570	55230226	1p32.2	NM_152268.3	NP_689481.2	7.307	7.114	6.838	7.18	7.053	7.008	7.323	6.372	7.149	7.136	7.224	8.119	8.069	7.87	8.001	7.676	8.032	7.624	7.091	7.63	7.799	7.115	7.725	7.103	6.994	7.533	7.497	6.953	7.524	6.829	7.917	7.45	7.453	7.326	7.032	7.637	7.434	7.171	6.843	7.433	6.931
TTC22	TTC22	55001	1	55246751	55266941	1p32.3	NM_017904.3	NP_060374.2			4.535				4.455					6.955	7.19	4.451		6.993	4.527			4.577	4.583		5.392											4.536		5.729				4.893	6.474
LEXM	LEXM	163747	1	55271735	55307937	1p32.3	NM_001110533.1	NP_689820.2		4.424	4.651		4.433		4.8		4.727		4.636	4.813	4.766			4.565	4.89	4.515	4.567	5.139	4.619	4.65	4.5		4.545			4.581		4.593		4.524			4.694		4.617				4.68
DHCR24	DHCR24	1718	1	55315299	55352921	1p32.3	NM_014762.3	NP_055577.1	9.275	9.495	10.108	11.014	11.171	10.542	9.654	9.372	11.113	11.214	11.259	10.582	10.534	9.821	10.432	10.358	10.052	8.843	9.416	10.428	9.984	9.537	10.569	5.733	9.877	10.191	11.046	9.721	10.381	9.36	10.562	9.385	9.947	9.662	8.097	11.152	10.439	9.369	10.435	9.493	9.978
TMEM61	TMEM61	199964	1	55446336	55457966	1p32.3	NM_182532.1	NP_872338.1																							5.661
MIR4426	MIR4426	100616345	1	55461299	192685520				7.24	7.019	6.868	6.455	6.425	7.476	6.281		6.204	6.494	6.529	6.45	7.9	7.244	7.115	6.941	7.233	7.107	6.589	7.861	6.949	6.673	7.208	7.49	8.18	6.504	6.83	7.514	6.939	7.235	6.862	7.318	6.855	7.254	6.736	6.869	7.255	6.75	6.681	7.552	7.296
BSND	BSND	7809	1	55464616	55474465	1p32.1	NM_057176.2	NP_476517.1	5.362	5.124	5.21	5.492	5.242	5.344	5.122		5.593	5.299	5.708	5.639	5.205	4.845	5.171	5.509	5.168	5.073	5.699	5.559	5.694	5.439	6.269	5.266	5.56	5.112	5.151	5.204	5.36	5.504	5.461	5.437	5.499	5.199	5.299	5.332	4.99	4.984	5.408	5.142	5.379
PCSK9	PCSK9	255738	1	55505148	55530526	1p32.3	NM_174936.3	NP_777596.2	5.893	6.315	5.874	7.215	5.871	5.787	5.902		5.932	5.824	5.867	8.202	7.517	7.192	6.225	5.816	9.152	6.869	5.923	5.912	7.166	5.857	5.965	5.661	5.709	6.202	5.791	5.743	5.995	5.841	6.421	5.887	5.685	6.08	6.211	7.195	6.405	5.865	5.746	5.887	5.845
USP24	USP24	23358	1	55532031	55681039	1p32.3	NM_015306.2	NP_056121.2	6.953	7.663	8.144	8.208	7.405	8.409	7.709	6.285	7.893	8.142	7.873	8.236	8.301	8.21	7.853	8.499	7.509	8.048	8.159	8.362	8.238	7.918	7.595	8.927	8.338	7.655	8.223	8.357	8.284	7.697	8.525	8.519	8.159	7.902	7.547	9.047	8.147	7.92	7.746	8.27	8.345
LOC100507634	LOC100507634	100507634	1	55681080	55683128	1p32.3			6.193	6.418	6.155	5.963	6.625	6.446	6.095		6.39	6.13	6.289	5.804	6.784	6.389	6.513	5.895	6.05	6.276	6.282	6.056	7.015	6.131	5.969	6.816	6.049	6.52	6.185	7.453	6.477	6.13	7.06	7.057	6.584	6.569	6.496	7.071	6.485	6.256	5.981	6.315	6.697
GYG1P3	GYG1P3	645506	1	55687951	55689746	1p32.3			7.967	7.35	8.25	8.133	8.083	8.542	8.214		7.819	7.628	7.709	8.217	7.883	7.602	7.465	7.843	7.475	7.372	7.248	8.287	7.549	6.706	7.942	9.202	8.257	8.184	8.481	8.222	8.676	7.756	8.366	8.52	8.491	8.41	7.511	7.914	7.985	7.561	8.385	8.042	7.14
MIR4422	MIR4422	100616272	1	55691313	55691396				4.534	5.225	5.219	5.328	4.841	4.724	4.822		5.26	5.291	5.475	5.203	5.269	5.02	4.511	5.088	4.831	4.598	4.956	4.702	5.185	4.63					5.161	4.91	5.1	4.717	4.97	4.916		4.595	5.015	5.055	5.128	4.993	4.887	4.671	5.295
GOT2P1	GOT2P1	645538	1	55833137	55834446	1p32.3			4.749	4.535		4.458			4.578		5.212		4.936	4.762	4.523			4.53		4.436	4.681	4.624	4.696	4.798		5.438	4.69	4.654			4.657	4.505	4.685			4.548	4.579		5.047	4.636	4.615		4.796
PLPP3	PLPP3	8613	1	56960418	57045257	1p32.2	NM_003713.4	NP_003704.3	5.952	6.242	7.92	8.53	5.41	6.563	4.473	5.573		9.058	5.445	6.175	5.703	5.326	5.234	5.693	5.543	7.814		4.504			5.317	5.306	4.632	7.928	7.22	8.607	8.346	5.651	6.358	8.122	6.352	6.631	6.637	8.714	5.191	6.176	6.791	6.422	6.297
PRKAA2	PRKAA2	5563	1	57110989	57181008	1p31	NM_006252.3	NP_006243.2		5.626	4.623	4.487	6.066	7.318	4.721		6.47	5.661	6.857			5.991				7.386				4.742		6.03				6.872	4.472	6.486		6.453			6.309	7.265	5.162	5.188	5.358	6.771	6.395
C1orf168	C1orf168	199920	1	57184476	57285369	1p32.2	NM_001004303.4	NP_001004303.3					5.8
C8A	C8A	731	1	57320442	57383894	1p32	NM_000562.2	NP_000553.1	5.184	5.179	5.201	5.203	5.044	4.704	4.841		5.271	4.945	5.191	4.836	5.33	5.002	4.935	4.984	5.278	4.73	5.174	5.075	5.091	5.194	5.471	4.872	5.065		5.297	4.974	5.012	4.916	4.621	5.082	5.251	5.332	4.947	4.963	5.229	5.196	5.036	5.256	5.211
C8B	C8B	732	1	57394882	57431813	1p32.2	NM_000066.3	NP_000057.2																	4.43																							4.599
DAB1	DAB1	1600	1	57463578	58716211	1p32-p31	NM_021080.3	NP_066566.3										6.313	5.345	4.845							6.856			4.77										4.689
OMA1	OMA1	115209	1	58946390	59012471	1p32.2-p32.1	NM_145243.3	NP_660286.1	6.528	5.466	5.315	5.23	6.751	5.961	5.811		6.024	6.63	5.78	7.433	7.116	7.066	7.216	6.857	6.893	5.593	6.762	6.736	6.678	6.598	7.59	6.692	6.795	7.922	7.534	6.921	7.038	6.654	7.978	7.006	6.725	6.443	5.57	6.407	6.473	6.036	5.963	6.551	6.364
TACSTD2	TACSTD2	4070	1	59041094	59043166	1p32	NM_002353.2	NP_002344.2	8.776	7.411			9.888		4.444				4.445	8.811	6.4	4.776	8.507	9.65	5.085		4.771		4.493		4.552		4.47					4.59				4.479		5.092	6.08	8.694		4.501	10.48
MYSM1	MYSM1	114803	1	59120410	59165747	1p32.1	NM_001085487.2	NP_001078956.1	6.574	5.976	7.028	7.241	6.575	7.597	6.736	5.7	6.948	7.21	6.976	6.62	7.067	7.398	7.439	7.287	7.146	7.252	7.227	7.66	7.069	7.218	6.96	7.776	7.137	7.341	8.261	7.329	7.625	7.224	8.247	7.506	7.697	7.714	6.087	6.783	6.537	6.037	7.213	7.239
JUN	JUN	3725	1	59246462	59249785	1p32-p31	NM_002228.3	NP_002219.1	5.695	7.527	7.502	8.314	6.039	8.374	7.304	6.647	7.655	7.891	7.898	6.694	6.933	5.336	6.356	6.597	7.028	7.13	5.678	5.215	6.57	5.273	6.165	7.612	8.152	4.896	6.367	6.913	5.437	6.005	5.361	5.565	6.034	5.804	6.026	6.523	7.211	7.085	8.476	6.902	6.544
PHBP3	PHBP3	391044	1	59465347	59466162	1p32.1			7.791	7.832	7.097	7.18	7.472	7.815	7.998		7.772	6.973	7.213	8.432	8.003	8.236	7.921	7.935	7.716	7.4	7.257	7.963	7.757	7.601	8.122	7.954	8.432	8.094	7.731	8.216	7.758	7.966	7.763	8.502	7.654	7.653	7.82	7.537	8.196	7.466	7.912	8.102	7.312
FGGY	FGGY	55277	1	59762624	60228402	1p32.1	NM_018291.3	NP_001106882.1	5.725	5.003	5.51	5.57	5.657	6.183	5.829		5.769	6.391	5.759	7.001	5.99	5.86	6.088	6.017	6.141	7.357	6.684	5.647	5.59	5.907	4.931	6.093	6.3	6.63	6.242	7.142	6.763	5.694	6.572	6.163	5.596	5.332	5.211	5.557	6.546	5.872	5.605	6.467	6.429
HOOK1	HOOK1	51361	1	60280532	60342050	1p32.1	NM_015888.4	NP_056972.1	6.395				6.808							7.762	7.513	6.587	8.172	6.806	6.775	6.7					7.073					5.47													6.753
CYP2J2	CYP2J2	1573	1	60358979	60392423	1p31.3-p31.2	NM_000775.2	NP_000766.2	7.497				5.66				4.669	5.423	4.763	6.576	6.42	4.5	5.201	4.593	6.053	4.755					4.81		4.426			6.93	4.799	4.992	4.886	5.795	6.366	5.569					4.654	4.535	6.039
C1orf87	C1orf87	127795	1	60456065	60539442	1p32.1	NM_152377.2	NP_689590.1	4.726	4.869	4.638	4.574		4.491	4.644		5.052		4.739	4.702			4.513		4.649	4.532	5.008	4.974	4.934	4.684	4.664		4.578	4.766		4.558	4.526		4.461	4.765	4.462	4.572	4.598	4.502	4.759	4.842	4.675		4.739
NFIA	NFIA	4774	1	61542945	61928460	1p31.3-p31.2	NM_005595.4	NP_005586.1	5.964	5.351			8.089	5.53					4.597	4.701	6.141	5.826	7.183	6.511	6.642			5.243	5.877		7.196		6.158	5.115		5.932	4.94	5.937	6.722	6.867	5.681	5.532	6.083	7.202	4.992	5.317	5.754	6.153	5.536
TM2D1	TM2D1	83941	1	62146718	62191095	1p31.3	NM_032027.2	NP_114416.1	6.375	6.374	6.424	6.58	7.575	6.95	7.132	7.245	7.191	7.44	6.995	7.513	6.931	6.713	6.89	6.839	7.35	6.864	6.251	6.923	6.904	6.19	6.828	7.172	7.072	7.485	7.656	7.405	8.017	7.142	7.982	7.29	7.208	7.127	5.823	7.371	6.506	7.533	7.61	7.376	7.086
INADL	INADL	10207	1	62208148	62629591	1p31.3	NM_176877.2	NP_795352.2	7.377	5.317	5.197	4.437	8.824	5.443	5.351		6.226	5.13	6.143	7.429	7.563	7.246	7.774	7.806	7.304	7.21					6.612			5.801	5.565	4.568	5.693	5.787	5.66	5.043	4.988	5.169	6.399	6.958	5.466		6.096	6.361	7.504
KANK4	KANK4	163782	1	62701836	62785083	1p31.3	NM_181712.4	NP_859063.3							4.433
USP1	USP1	7398	1	62901974	62917475	1p31.3	NM_001017416.1	NP_003359.3	7.798	8.486	8.446	8.991	7.593	9.345	8.369	9.393	8.926	8.86	8.522	8.653	8.384	8.05	8.977	8.763	8.46	8.311	9.15	8.844	8.371	9.025	8.988	8.385	8.799	8.023	8.609	8.261	8.266	7.853	8.562	7.686	7.976	7.58	7.386	8.012	8.446	7.47	8.143	8.694	8.282
DOCK7	DOCK7	85440	1	62920396	63154039	1p31.3	NM_033407.3	NP_212132.2	6.46	7.375	8.064	7.868	6.645	8.427	7.58	7.622	8.047	8.59	7.506	6.853	7.015	7.829	7.971	7.029	7.368	7.304	6.658	6.317	5.881	6.254	5.681	6.761	8.002	8.474	9.263	8.089	8.798	8.144	8.957	8.14	8.38	7.984	6.495	7.516	7.236	7.548	7.962	7.248	7.436
LOC400756	LOC400756	400756	1	62926691	62948952	1p31.3											4.654	5.115	4.816		4.501				4.766	5.065	4.668		4.442	4.432					5.833	5.178	4.883	4.56	5.574	4.747	5.109	5.093		4.579	5.013	5.226		4.759	4.544
ATG4C	ATG4C	84938	1	63249776	63330941	1p31.3	NM_178221.2	NP_116241.2	6.414	5.774	5.661	6.256	5.632	6.667	6.41		6.022	7.006	5.896	6.728	6.772	6.445	6.924	5.173	6.419	5.685	6.676	6.958	6.281	6.497	6.587	6.41	7.232	6.948	6.292	6.651	6.366	6.154	7.036	6.529	6.235	6.025	5.488	5.939	6.094	5.558	5.036	6.657	5.826
LINC00466	LINC00466	199899	1	63624753	63782928	1p31.3			6.05	6.103	6.35	5.956	5.926	5.642	6.005		6.101	5.511	6.108	5.94	5.933	5.743	5.801	5.826	6.118	5.876	6.342	6.648	6.263	6.248	6.089	5.572	5.584	5.64	5.655	5.96	5.811	5.821	5.789	5.985	5.866	5.863	6.105	5.923	5.868	6.098	5.874	5.91	5.991
FOXD3	FOXD3	27022	1	63788729	63790797	1p31.3	NM_012183.2	NP_036315.1																										5.99	5.577	4.922	5.489		5.714		5.233	5.991
ALG6	ALG6	29929	1	63833260	63904233	1p31.3	NM_013339.3	NP_037471.2	6.342	6.204	5.591	6.319	6.447	5.964	6.667	5.576	6.127	7.548	6.177	7.543	7.343	6.765	6.673	6.246	5.864	5.826	7.113	6.126	6.438	6.85	7.434	7.361	7.09	7.238	7.593	6.606	7.237	6.566	7.91	7.728	6.653	6.437	5.837	6.496	6.784	6.076	6.258	7.224	6.842
ITGB3BP	ITGB3BP	23421	1	63906440	63988944	1p31.3	NM_014288.4	NP_055103.3	7.845	7.391	7.857	8.071	7.509	8.452	8.663		8.261	8.444	7.868	8.562	7.869	8.723	8.404	8.417	9.101	8.315	8.428	8.423	8.411	8.474	9.01	8.329	8.448	8.276	8.591	8.619	8.136	7.835	8.74	8.155	7.899	7.777	7.566	7.633	8.529	7.425	7.445	8.232	7.397
EFCAB7	EFCAB7	84455	1	63988971	64038364	1p31.3	NM_032437.2	NP_115813.2	5.011	4.525	5.081	5.455	5.311	5.667	6.012	5.043	5.122	6.677	5.132	6.022	5.344	6.008	5.653	5.198	5.383	5.705	5.896	5.151	4.596	5.87	5.553	5.567	5.836	6.166	6.473	6.076	6.584	5.19	6.688	6.245	5.651	5.486	4.954	5.072	5.285	5.029	5.099	5.654	5.14
DLEU2L	DLEU2L	79469	1	64014650	64016307	1p31-p22			4.765	4.684	5.042	5.156	5.141	5.309	5.322		5.343	6.202	4.92	5.225	5.165	5.265	5.921	4.982	4.442	6.079	5.842	4.891	4.98	5.585	5.554	5.615	4.537	5.452	6.148	4.916	5.174	5.194	5.944	4.941	4.725	4.822	5.477	5.093	4.873	4.932		5.357	5.066
PGM1	PGM1	5236	1	64058946	64125916	1p31	NM_001172818.1	NP_001166290.1	5.736	8.563	8.95	8.124	7.57	9.372	8.237	9.133	8.559	9.636	8.521	8.062	8.069	8.259	8.961	8.128	8.79	7.639	7.9	8.571		7.748	7.568	8.588	7.635	9.298	9.708	8.518	9.675	8.718	9.885	9.979	9.061	8.885	7.889	8.569	8.67	8.605	8.12	8.672	8.32
ROR1	ROR1	4919	1	64239689	64647179	1p32-p31	NM_001083592.1	NP_005003.2		8.102	8.533	6.347		7.903	5.91	4.779	5.003	7.164	5.89	4.444	4.826	5.448	5.338	8.468	5.825	5.561	4.459	4.436	4.423		6.663	4.461	4.538	6.186	6.573	6.426	6.314	5.467	6.519	7.631	6.081	6.133	6.798	6.421	7.55	7.822	7.831	5.36	5.694
CFL1P3	CFL1P3	100131874	1	64308661	64309477	1p31.3			7.163	7.072	7.712	7.22	7.003	7.28	7.381		7.313	7.638	7.288	6.798	7.122	6.749	6.824	7.123	7.654	7.238	6.609	6.859	6.381	6.654	7.463	7.065	7.575	6.738	7.428	6.972	6.807	6.922	7.067	7.17	7.72	7.27	6.93	7.163	7.333	6.651	7.141	6.924	6.531
UBE2U	UBE2U	148581	1	64669489	64710027	1p31.3	NM_152489.1	NP_689702.1		4.501		4.635					4.522											4.471		4.479							4.563							4.475			4.664
CACHD1	CACHD1	57685	1	64936475	65158741	1p31.3	NM_020925.2	NP_065976.2	5.582	4.871	4.564	6.574	5.351	7.358	7.723		5.975	6.347	8.216	6.754	5.646	7.117	6.281	4.457	6.722	7.356	4.565	4.773	4.703	5.568	4.642	5.133	7.844	7.92	8.15	7.215	7.673	6.39	7.854	7.351	6.082	5.726	5.478	7.634	5.15	4.567	5.99	6.989	6.454
RAVER2	RAVER2	55225	1	65210777	65298914	1p31.3	NM_018211.3	NP_060681.2	6.419	6.285	5.083	6.845	7.262	7.621	6.772	4.881	7.168	5.505	6.79	6.201	7.316	8.508	8.199	5.664	7.678	7.351	7.161	7.626	6.042	7.16	7.231	7.129	7.508	7.62	7.87	7.084	7.488	7.109	7.83	7.252	7.423	7.042	6.549	7.465	6.782	4.781	6.54	7.151	7.307
JAK1	JAK1	3716	1	65298905	65432187	1p32.3-p31.3	NM_002227.2	NP_002218.2	7.487	8.383	9.243	9.564	10.2	9.484	8.994	7.945	8.464	9.343	8.339	9.191	8.302	8.619	8.357	7.966	8.644	8.566	8.202	7.623	7.885	7.331	8.426	9.519	8.786	8.713	8.939	8.368	8.813	8.052	8.837	8.546	8.313	7.993	9.097	9.318	8.921	8.476	9.298	8.535	8.283
SLC2A3P2	SLC2A3P2	391045	1	65448478	65451790	1p31.3								5.444				4.629					6.739			5.184			6.166			7.02	4.728	6.825	4.831	4.542	5.524	4.923	4.91	5.693	4.607		5.088	6.005		4.76		6.291	6.888
LOC645195	LOC645195	645195	1	65713846	65721849	1p31.3			5.26	6.963	6.682	6.417	6.485	7.755	5.142		6.416	6.112	6.746	5.229	5.511	6.345	5.775	5.064	5.89	7.182	5.14	5.371	8.085	5.801	5.606	7.354	5.748	5.97	6.439	7.386	5.912	6.313	5.423	5.864	5.635	5.948	5.597	6.055	6.121	6.266	6.523	5.323	6.194
DNAJC6	DNAJC6	9829	1	65730376	65881552	1p31.3	NM_001256864.1	NP_001243794.1	5.393	6.614	7.399	6.02	6.038	9.102	4.616		6.282	6.551	6.135		4.577	6.344	6.164		5.977	7.166			7.995	5.491	5.117	7.884	5.411	6.216	6.489	6.927	4.681	5.229	4.719	5.062	6.03	5.978	5.653	6.427	5.631	5.754	6.677	4.841	6.561
LEPROT	LEPROT	54741	1	65886130	65901690	1p31.3	NM_017526.4	NP_059996.1	7.049	8.414	8.738	7.73	8.081	8.303	7.869	8.493	7.767	8.449	7.847	7.514	7.045	6.533	7.518	7.98	6.915	7.379	6.304	6.758	8.19	5.806	7.782	8.875	7.919	8.722	8.877	8.706	7.944	7.605	8.668	8.488	7.61	7.51	8.006	8.955	7.909	9.29	8.671	7.907	8.316
LEPR	LEPR	3953	1	65886334	66103176	1p31	NM_001198689.1	NP_001185616.1	4.833			5.058							4.61							4.6	4.719	4.69	5.772			4.482													5.218	4.461
PDE4B	PDE4B	5142	1	66258192	66840262	1p31	NM_001037341.1	NP_001032418.1				5.807					5.09	5.214	5.3			8.64			4.772			5.375				5.159	5.852	7.694	7.076	6.354	7.959	5.948	7.12	4.563	7.189	6.393	5.772	6.478	4.531	5.408		8.239
SGIP1	SGIP1	84251	1	66999251	67216822	1p31.3	NM_032291.2	NP_115667.2			5.66			5.374																				5.68											4.488
TCTEX1D1	TCTEX1D1	200132	1	67218139	67244730	1p31.3	NM_152665.2	NP_689878.2																										5.127
INSL5	INSL5	10022	1	67263423	67266942	1p31.3	NM_005478.4	NP_005469.2		4.487	4.61						4.455								4.505	4.522				4.421	4.455							4.506										4.735
WDR78	WDR78	79819	1	67278571	67390570	1p31.3	NM_207014.2	NP_079039.4	4.717		4.651	5.687		4.815	4.687			5.28			6.202	5.07	5.479		4.96	4.867	4.642			4.604			4.773											5.736	4.712	5.146	5.526	5.913
MIER1	MIER1	57708	1	67390577	67454302	1p31.3	NM_001077703.2	NP_001139582.1	6.693	7.37	8.072	7.643	6.915	7.588	7.724	7.63	7.7	7.791	7.783	7.894	8.079	7.793	8.065	8.164	7.935	7.679	7.904	8.022	7.138	8.468	8.524	8.222	8.247	7.65	7.68	7.476	7.608	7.386	7.55	7.236	6.777	6.466	6.556	7.514	7.497	7.26	8.386	7.56	7.34
SLC35D1	SLC35D1	23169	1	67465014	67520080	1p32-p31	NM_015139.2	NP_055954.1	5.272	6.149	7.241	6.004	6.254	7.166	7.876	6.222	6.647	7.721	6.863	6.844	7.202	6.429	6.469	5.497	7.117	6.158	6.751	6.427	6.321	7.122	5.842	7.887	6.859	6.996	7.11	6.418	6.8	5.664	6.865	6.725	6.241	6.539	5.895	6.761	6.159	6.489	7.244	6.974	6.129
C1orf141	C1orf141	400757	1	67557858	67600654	1p31.3	NM_001013674.1	NP_001013696.1																								4.616
IL23R	IL23R	149233	1	67632168	67725650	1p31.3	NM_144701.2	NP_653302.2																				8.324	7.154			6.578				7.654
IL12RB2	IL12RB2	3595	1	67773046	67862583	1p31.3-p31.2	NM_001258215.1	NP_001245145.1																				5.336	4.59			6.675		5.979	7.901	5.541	6.946	6.155			5.725					4.58
SERBP1	SERBP1	26135	1	67873492	67896123	1p31	NM_001018069.1	NP_001018077.1	9.069	8.748	9.377	9.783	8.202	9.483	9.054	9.649	9.396	9.419	9.117	9.882	9.563	9.609	9.749	9.411	9.826	9.578	9.642	10.432	9.568	9.401	9.422	9.419	9.661	8.781	9.599	9.276	9.13	8.789	9.569	9.269	9.242	8.611	8.668	8.984	9.264	8.439	8.984	9.266	8.79
GADD45A	GADD45A	1647	1	68150859	68154021	1p31.2	NM_001199741.1	NP_001915.1	5.502	8.377	9.956	9.179	5.666	10.086	8.736	9.424	8.022	7.642	8.522	7.715	7.53	8.382	7.28	7.985	9.063	9.094	5.742	6.47	9.33	6.774	8.723	8.594	8.837	7.33	7.009	7.304	8.71	6.665	8.642	8.412	6.492	6.162	6.972	7.097	8.907	7.876	10.912	7.667	8.262
GNG12	GNG12	55970	1	68167148	68299155	1p31.3	NM_018841.5	NP_061329.3	5.969	8.127	9.65	9.284	6.659	9.238	8.289	7.397	8.029	8.696	7.987	7.582	7.289	7.394	6.512	7.776	7.176	6.247			4.505			6.71	8.821	8.632	9.816	9.085	8.994	8.506	9.254	9.465	9.368	9.234	7.653	8.801	7.864	7.986	8.803	7.929	7.111
GNG12-AS1	GNG12-AS1	100289178	1	68297970	68668670	1p31.3								4.53					4.477	4.466	4.436				4.528	4.726							4.59	5.341	6.761	5.205	4.919	5.027	5.575	5.198	5.573	5.269			4.435		4.44
DIRAS3	DIRAS3	9077	1	68511644	68517314	1p31	NM_004675.2	NP_004666.1				4.462		4.857	6.568		5.826	5.749	7.527	4.528		4.449			4.737				6.001					6.099					4.593			4.54		10.144		4.469
WLS	WLS	79971	1	68564141	68698284	1p31.3	NM_024911.6	NP_001180263.1	4.614	7.391	6.627	8.281	4.437	8.024	9.536	7.39	7.765	8.518	8.727	8.398	8.122	7.761	8.037	8.652	8.637	6.65	4.533	4.446		4.581	4.453	8.716	9.064	7.694	8.991	8.786	7.942	8.07	8.945	9.155	8.304	8.187	5.741	6.935	7.916	8.443	7.308	6.455	7.428
RPE65	RPE65	6121	1	68894506	68915642	1p31	NM_000329.2	NP_000320.1
DEPDC1	DEPDC1	55635	1	68939834	68962904	1p31.2	NM_017779.4	NP_060249.2	7.052	7.791	8.132	8.107	6.55	8.623	8.433	6.976	8.538	8.32	8.492	7.242	6.964	8.291	7.595	7.005	7.194	7.021	7.405	6.692	6.369		6.447	7.69	8.238	7.327	7.905	7.504	7.852	7.184	7.935	8.251	7.31	7.087	7.111	7.643	7.752	8.198	7.415	7.784	7.772
LRRC7	LRRC7	57554	1	70225857	70589171	1p31.1	NM_020794.2	NP_065845.1				4.957		4.485				5.47																											5.576
PIN1P1	PIN1P1	5301	1	70385004	70386000	1p31			6.757	7.457	6.775	7.021	6.916	7.731	7.522		7.712	7.325	7.197	7.581	6.892	7.163	7.239	6.768	7.388	6.937	7.509	7.472	7.226	7.323	7.369	7.593	7.28	7.273	7.189	7.371	7.156	7.108	7.119	7.332	7.321	7.012	6.773	6.693	6.885	7.07	7.397	6.981	6.801
LRRC40	LRRC40	55631	1	70610484	70671361	1p31.1	NM_017768.4	NP_060238.3	7.103	7.83	7.977	8.288	7.081	8.82	7.973	9.248	7.957	7.78	7.679	7.257	8.036	7.864	8.373	7.729	7.792	7.972	8.379	8.063	7.774	7.957	7.461	8.343	8.352	7.763	7.919	7.515	7.963	7.098	8.031	6.666	7.003	6.647	7.397	7.939	6.973	7.771	7.837	7.999	7.367
SRSF11	SRSF11	9295	1	70671364	70717701	1p31	NM_004768.3	NP_001177916.1	6.933	7.789	7.681	7.81	7.353	8.185	7.04	11.515	7.694	8.367	7.657	6.5	7.761	8.037	8.321	7.936	7.163	7.883	8.111	8.175	7.494	8.105	7.31	8.279	7.181	7.692	8.501	7.58	8.169	7.555	8.502	6.949	7.416	7.086	6.778	7.43	6.649	7.325	7.819	7.416	7.348
ANKRD13C	ANKRD13C	81573	1	70724684	70820417	1p32.3-p31.3	NM_030816.4	NP_110443.3	6.718	8.172	7.739	7.774	7.035	7.637	7.791	6.557	7.316	8.08	7.23	6.832	7.363	7.346	7.524	6.89	6.966	6.436	6.866	6.396	6.373	6.652	6.345	7.932	7.378	7.392	7.931	7.492	7.225	6.53	7.301	6.647	6.703	6.68	6.148	7.678	6.511	7.635	7.409	7.774	7.465
HHLA3	HHLA3	11147	1	70820492	70833705	1p31.1	NM_001036645.1	NP_001026863.1	5.082		7.105	6.284	4.928	6.388	6.321	5.492	5.489	7.644	5.962	5.344	7.367	5.945	6.371	4.994	6.475	4.846	5.399		5.895	5.763	5.205	5.68	4.658	5.773	5.54	5.857	5.223	4.767	5.688	4.89	5.108	4.867	5.049	5.096	5.596	5.86	4.939	6.613	6.423
CTH	CTH	1491	1	70876900	70905534	1p31.1	NM_001190463.1	NP_714964.2	4.539	7.348	5.949	4.593	4.785	6.547	5.71	4.584	4.803	5.042	6.005		6.086	6.224	6.272	4.919	6.387	5.125		5.544	6.679	4.76	5.382	6.039	4.949	6.358	6.162	6.562	6.535	5.647	6.492	5.068	5.557	5.197	4.57		4.81	5.263	5.039	6.564	5.145
PTGER3	PTGER3	5733	1	71318035	71513491	1p31.2	NM_198715.2	NP_942008.1					7.671																4.612
ZRANB2-AS1	ZRANB2-AS1	100132618	1	71512188	71532865	1p31.1						4.696	4.708	4.546				4.514	4.507		4.745		4.481	4.888			4.686	4.599	4.868	4.673	4.647	4.75	4.937	4.461	4.531	4.932	4.671		4.719		4.988	4.655		4.512			4.5
ZRANB2	ZRANB2	9406	1	71528973	71546972	1p31	NM_203350.2	NP_976225.1	7.288	8.243	7.982	8.413	7.809	8.579	8.217	7.422	8.217	8.307	8.445	7.61	8.312	8.337	8.125	8.387	7.666	8.382	8.758	8.908	8.748	8.411	8.675	8.642	8.421	7.758	8.725	8.417	8.8	7.505	8.559	7.777	8.432	8.044	6.822	7.852	7.553	7.405	8.182	7.997	7.824
MIR186	MIR186	406962	1	71533313	71533399	1p31.1																										4.619
ZRANB2-AS2	ZRANB2-AS2	100852410	1	71547006	71703406	1p31.1			4.478			4.619		4.433			4.462	4.674			4.49		4.967				5.041	4.96	4.587	4.827			4.517	5.023	5.022	4.826	4.991	4.64	5.301		4.5	4.747			4.484
NEGR1	NEGR1	257194	1	71868624	72748277	1p31.1	NM_173808.2	NP_776169.2		6.161	6.764	5.611		8.317			5.609	4.852	5.451								4.581						5.187			6.128				4.579					5.929	5.157	4.675		4.503
GDI2P2	GDI2P2	100420259	1	72740225	72740839				7.578	7.315	7.075	7.902	7.658	7.497	7.542		7.324	7.356	6.598	7.915	7.811	7.169	7.417	7.778	7.577	7.35	7.526	7.825	7.469	7.353	7.668	7.783	7.796	7.658	7.58	7.961	7.254	7.025	7.207	6.968	7.475	6.988	7.612	8.201	7.1	7.99	7.232	7.941	6.445
KRT8P21	KRT8P21	126811	1	73570461	73572166	1p31.1			8.203	7.999	8.061	8.203	8.049	7.299	7.69		7.93	7.494	8.335	8.08	7.997	7.687	7.889	7.796	7.988	8.019	8.045	7.846	8.174	8.068	7.682	7.57	7.284	6.96	7.397	7.513	7.537	7.719	7.384	7.747	7.169	7.268	8.165	8.092	7.97	8.108	8.469	7.967	8.306
LRRIQ3	LRRIQ3	127255	1	74491701	74663871	1p31.1	NM_001105659.1	NP_001099129.1																				4.431								4.669	5.353		5.3										4.607
FPGT	FPGT	8790	1	74663895	74674386	1p31.1	NM_001199329.2	NP_001186257.2	5.914	6.547	6.187	6.165	7.078	5.79	6.732	5.997	6.757	7.058	6.544	6.865	7.081	6.286	7.007	6.356	6.464	5.863	5.629	6.645	6.768	5.457	5.497	5.513	7.085	7.046	7.104	6.502	7.08	6.082	7.187	6.143	6.178	5.906	6.187	7.196	4.799	6.102	6.517	6.977	6.738
TNNI3K	TNNI3K	51086	1	74701070	75010116	1p31.1	NM_015978.2	NP_057062.1		4.57		4.683					4.464	5.021	4.421			4.663	4.883	4.426			4.45	4.695					4.567		4.712				4.557					4.491		4.59	4.447	4.486	4.794
ERICH3	ERICH3	127254	1	75033794	75139422	1p31.1	NM_001002912.4	NP_001002912.4												4.446
CRYZ	CRYZ	1429	1	75171171	75199092	1p31.1	NM_001130043.1	NP_001123514.1	7.95	8.153	7.242	8.072	8.475	8.89	7.342	8.154	8.824	8.765	8.714	8.513	8.748	8.124	8.64	9.241	8.596	8.208	8.246	7.155	8.682	7.676	7.45	7.726	8.509	7.486	8.379	8.303	7.968	7.66	8.294	6.5	7.776	7.493	9.386	9.957	7.059	8.21	6.516	9.082	7.64
TYW3	TYW3	127253	1	75198835	75232360	1p31.1	NM_001162916.1	NP_001156388.1	7.892	9.792	8.424	8.697	8.052	9.251	8.718	6.071	8.477	8.929	8.641	8.007	8.951	9.212	9.382	8.554	8.083	8.726	8.753	9.431	9.144	8.882	8.338	9.455	9.083	8.41	9.409	9.448	9.336	8.643	8.759	8.655	8.901	8.734	7.931	8.941	8.538	8.611	8.247	9.22	8.612
LHX8	LHX8	431707	1	75594118	75627218	1p31.1	NM_001001933.1	NP_001001933.1							5.237	7.972		7.934																	4.601		7.323						6.818	5.097
SLC44A5	SLC44A5	204962	1	75667815	76076799	1p31.1	NM_152697.4	NP_689910.2									5.362		4.476	5.445		5.147		7.305	4.559	6.544	4.701		4.773	4.955	5.041													5.454	4.575	5.581		6.625	6.899
ACADM	ACADM	34	1	76190031	76229363	1p31	NM_000016.4	NP_000007.1	7.341	8.614	7.654	8.392	7.193	8.27	8.056	8.279	8.124	7.927	7.965	8.086	8.433	8.375	8.645	7.331	8.849	8.466	9.03	8.7	8.758	8.785	7.572	9.049	8.556	9.056	8.865	8.634	9.173	8.336	9.061	7.247	8.353	8.282	6.914	8.026	7.363	7.904	7.631	8.067	6.846
RABGGTB	RABGGTB	5876	1	76251878	76260775	1p31	NM_004582.3	NP_004573.2	7.148	9.754	8.823	8.333	6.965	8.401	8.821	8.536	8.666	7.869	8.991	7.606	8.788	9.418	9.123	8.254	9.173	9.129	8.154	8.335	8.994	8.133	6.998	8.541	8.806	7.794	8.222	8.902	8.502	9.127	8.841	7.673	8.383	7.914	8.037	8.383	7.955	8.942	9.645	8.3	7.889
MSH4	MSH4	4438	1	76262555	76378923	1p31	NM_002440.3	NP_002431.2
ST6GALNAC3	ST6GALNAC3	256435	1	76540388	77096669	1p31.1	NM_001160011.1	NP_694541.2				4.473						4.845									4.421							6.931	7.51	4.469	5.399	5.696	7.483	5.677	7.052	6.372
TPI1P1	TPI1P1	729708	1	77165448	77166664	1p31.1			9.653	9.054	9.198	9.553	8.046	10.378	9.675		9.64	9.481	9.152	9.841	9.628	9.693	9.76	9.619	10.083	10.006	9.052	9.344	8.948	9.065	9.284	10.244	10.031	9.416	9.797	9.702	9.556	9.799	9.455	9.763	10.262	9.906	9.395	9.485	9.681	8.895	9.521	9.965	9.976
ST6GALNAC5	ST6GALNAC5	81849	1	77333185	77529737	1p31.1	NM_030965.1	NP_112227.1	5.244		8.384	5.535		7.226	4.59		4.428	4.563	4.664	4.43		4.958				4.596					4.696	4.541				4.9		4.469				4.737		4.501		5.079	5.236		4.841
PIGK	PIGK	10026	1	77554666	77685132	1p31.1	NM_005482.2	NP_005473.1	6.03	8.136	7.62	6.59	6.519	7.358	7.898	5.425	7.44	7.841	7.001	6.663	6.416	6.891	6.653	6.168	6.986	6.35	6.673	7.308	6.337	5.714	6.247	6.858	7.522	7.429	7.338	7.475	7.686	6.364	7.472	6.235	6.644	6.304	5.863	7.16	6.19	6.946	6.698	6.89	6.757
AK5	AK5	26289	1	77747661	78025654	1p31	NM_012093.3	NP_777283.1			6.067	4.519		5.348	4.698		4.545	6.732	4.664														5.918		8.256	4.58	6.287				4.728	4.742			4.436		4.777
ZZZ3	ZZZ3	26009	1	78028100	78149112	1p31.1	NM_015534.4	NP_056349.1	7.537	9.129	8.173	8.187	6.82	8.371	8.197	6.648	8.04	8.19	7.986	7.443	7.983	8.1	8.126	8.052	7.629	7.711	7.573	7.953	7.388	7.661	7.194	7.957	8.222	8.101	8.528	8.068	8.307	7.689	8.751	6.813	7.953	7.419	6.699	7.75	7.457	7.942	8.056	7.885	7.64
USP33	USP33	23032	1	78161673	78225564	1p31.1	NM_201626.2	NP_055832.3	7.437	9.383	8.376	8.215	7.457	8.714	8.548	8.137	8.518	8.604	8.496	7.668	8.487	8.467	8.533	8.01	8.313	8.029	8.189	8.058	8.047	7.811	7.242	8.273	8.565	8.742	8.75	8.671	8.584	8.052	8.562	7.682	8.122	7.827	7.208	8.187	6.986	8.185	8.281	8.393	7.608
FAM73A	FAM73A	374986	1	78245308	78345225	1p31.1	NM_198549.3	NP_001257313.1	6.193	7.978	7.321	7.263	6.275	7.407	7.582	5.472	6.938	7.115	6.531	6.03	7.598	6.742	7.214	6.498	6.861	5.968	6.069	6.204	5.484	6.103	5.395	6.722	7.409	7.361	7.44	7.789	7.834	7.033	7.568	7.09	7.104	6.838	6.333	7.217	6.411	7.074	7.523	7.432	7.137
NEXN-AS1	NEXN-AS1	374987	1	78347032	78355224	1p31.1			4.83	5.892	5.922	4.971	5.235	7.605	5.752		5.356	5.317	5.532	5.077	5.074	5.043	5.043	4.873	5.267	4.966	5.095	5.291	5.125	4.964	5.174	4.618	5.129	4.756	4.794	5.023	4.923	5.528	4.817	5.12	4.91	5.152	5.101	5.841	5.693	5.552	5.856	5.183	5.18
NEXN	NEXN	91624	1	78354199	78409578	1p31.1	NM_001172309.1	NP_001165780.1		5.997	7.792			7.108	5.884	6.243	4.514	5.617	4.816											5.038														4.88	4.851	5.067	5.046
FUBP1	FUBP1	8880	1	78412166	78444889	1p31.1	NM_003902.3	NP_003893.2	9.134	9.366	8.35	9.451	8.907	9.394	8.557	6.212	9.019	8.915	9.013	9.171	9.087	8.946	9.256	9.577	8.208	9.526	9.779	9.515	9.327	9.674	8.919	9.369	9.219	8.499	9.078	9.005	8.572	8.326	8.831	8.19	8.207	8.004	8.496	8.769	8.622	8.25	8.827	9.392	8.598
DNAJB4	DNAJB4	11080	1	78444841	78483648	1p31.1	NM_007034.3	NP_008965.2	4.433	6.571	7.611	7.943	4.594	7.613	7.116	5.849	6.669	7.01	6.544	4.587	6.547	6.178	5.405	5.417	5.713	4.777	4.736	4.66	5.664	4.971	5.26	5.111	6.897	5.552	5.413	5.521	5.435	5.28	5.752	4.991	4.693	4.935	5.928	5.817	5.444	6.437	8.282	6.534	6.215
GIPC2	GIPC2	54810	1	78510645	78604133	1p31.1	NM_017655.4	NP_060125.4												7.792	7.031			7.248	7.845
MGC27382	MGC27382	149047	1	78695282	78835147	1p31.1						4.92						7.305													4.569														4.513	4.563
PTGFR	PTGFR	5737	1	78956727	79006386	1p31.1	NM_001039585.1	NP_001034674.1			5.986	6.527		5.52	7.738	6.671		8.562	5.374														4.688														5.681
IFI44L	IFI44L	10964	1	79086066	79111830	1p31.1	NM_006820.2	NP_006811.2				6.829			5.57	6.122		5.678	6.586		5.878			9.761							8.334	5.746	6.264														6.571		4.538
IFI44	IFI44	10561	1	79115476	79129763	1p31.1	NM_006417.4	NP_006408.3		5.359		7.271			6.532	8.826	5.245	6.648	6.61		4.834			9.95			5.176			6.033	6.64	6.416	7.932		5.869	5.113	5.125			4.632	4.742	4.746				6.804	7.594		4.689
ADGRL4	ADGRL4	64123	1	79355448	79472495	1p33-p32	NM_022159.3	NP_071442.2							5.215																		6.075			5.401												4.987
PSAT1P3	PSAT1P3	729779	1	79520632	79521739	1p31.1			6.327	8.972	8.64	8.973	6.058	8.317	7.737		7.703	8.181	8.364	8.203	7.449	9.145	8.311	8.148	8.973	9.381	8.51	8.583	8.248	7.351	8.114	5.591	7.484	8.032	8.543	7.774	8.065	8.424	7.769	8.894	8.827	8.519	8.865	7.36	7.59	6.741	8.592	7.643	7.427
ADH5P2	ADH5P2	343296	1	79986753	79988151	1p31.1			5.772	5.86	5.857	5.805	5.447	6.465	5.736		6.025	5.649	5.128	5.964	5.965	6.116	5.961	5.964	5.718	5.289	5.844	5.529	6.075	6.16	5.194	5.78	6.176	5.868	5.923	5.769	5.856	5.814	5.504	5.958	5.834	5.607	5.417	5.551	5.834	5.257	5.207	5.804	5.334
RNU5D-1	RNU5D-1	26830	1	80501462	80746718	1p34.1			6.295		4.731	6.324	4.794		5.466		5.253	5.328	5.043			7.972	8.038	6.622	7.322	7.042	5.821	7.843	7.706	6.935	10.629	9.665	6.538	6.845		7.472	5.554			5.132	5.337	4.842		5.299	5.517				4.681
HMGB1P18	HMGB1P18	646526	1	80749036	80749653	1p31.1				4.927	4.985	4.836		4.448	5.274		4.471	4.959	5.092	4.661	4.973			5.232	4.745	4.687	4.721	5.069	5.377		4.848	4.67	5.109		4.504	4.62	4.94	5.288	4.682	4.849	4.733	4.878	4.824	4.986		4.795		4.597	4.738
HNRNPA1P64	HNRNPA1P64	100129325	1	80916766	80961814	1p31.1			9.482	9.582	9.165	9.396	9.134	9.598	9.205		9.534	9.037	9.334	9.765	9.56	9.687	9.621	9.362	9.694	9.807	9.814	10.134	9.638	9.994	9.699	9.702	9.678	9.263	9.275	9.583	9.153	9.421	9.145	9.671	9.453	9.32	9.18	8.913	9.402	8.939	9.318	9.504	9.114
RPL7P10	RPL7P10	646538	1	81563879	81564710	1p31.1			6.603	6.221	7.248	7.681	6.83	7.059	6.461		6.48	6.26	6.357	7.863	6.837	7.599	6.83	6.758	6.549	6.869	6.664	6.934	6.82	6.894	6.982	6.832	7.69	6.561	6.562	7.135	6.691	7.892	6.667	7.054	6.599	6.892	6.376	6.228	7.149	6.707	6.627	7.124	6.619
HNRNPA3P14	HNRNPA3P14	729817	1	81892209	81893095	1p31.1			5.417	5.193	5.056	5.285	5.081	5.625	4.826		5.685	5.118	5.438	5.477	5.092	5.787	5.403	5.499	5.15	5.391	5.767	6.167	5.69	5.757	5.813	5.733	6.204	5.547	5.128	5.748	5.88	5.514	5.801	5.683	5.388	5.599	5.505	5.12	5.12	4.943	5.196	5.606	5.445
ADGRL2	ADGRL2	23266	1	82165454	82458422	1p31.1	NM_012302.2	NP_036434.1			5.259	5.434							4.432														4.917		4.828			4.765		4.591							6.25		5.863
ST13P20	ST13P20	729828	1	82187384	82188742	1p31.1			6.88	6.85	7.789	7.571	7.29	7.069	7.388		7.302	7.166	7.324	7.381	7.596	7.633	7.634	7.083	7.455	7.387	7.411	7.512	7.301	7.25	7.578	7.114	7.238	7.27	7.377	9.22	7.941	7.651	7.701	7.646	7.399	7.385	6.49	6.996	7.393	7.299	7.09	7.361	8.029
TTLL7	TTLL7	79739	1	84335056	84464833	1p31.1	NM_024686.4	NP_078962.4		6.466	6.001	5.882	5.709	6.558	5.866	5.434	7.012	6.906	7.302			6.317	5.194			5.418						6.138	4.6		6.293	5.339	5.57	5.955	6.214		5.273	4.725	4.599	5.473	4.756	6.509	5.188	5.027	4.877
PRKACB	PRKACB	5567	1	84543657	84704181	1p31.1	NM_001242862.1	NP_002722.1	5.335	7.616	7.461	6.358	6.12	7.793	7.691	7.155	7.821	7.485	7.621		5.315	9.079	6.132			6.71	8.431	7.389		8.319	7.753	6.679	8.12	6.942	7.856	7.996	7.739	6.778	7.86	7.89	8.128	7.841	5.959	7.393	6.491	5.309	7.717	6.297	6.719
LOC100128775	LOC100128775	100128775	1	84710016	84710259	1p31.1			6.471	6.67	6.092	6.674	6.139	6.562	6.483		6.909	6.302	6.404	6.8	6.679	5.904	6.507	6.062	6.692	6.605	6.97	7.178	6.66	6.766	6.432	6.811	7.271	6.897	6.09	7.482	6.531	7.011	6.545	6.958	6.759	6.582	6.794	6.337	7.202	7.193	6.937	6.933	6.665
SAMD13	SAMD13	148418	1	84764048	84816481	1p31.1	NM_001134663.1	NP_001010971.1														6.162													5.041				4.504					4.521
DNASE2B	DNASE2B	58511	1	84864214	84880691	1p22.3	NM_021233.2	NP_067056.2																										6.977					6.515
RPF1	RPF1	80135	1	84944919	84964033	1p22.3	NM_025065.6	NP_079341.2	6.934	8.576	7.48	7.884	7.1	8.305	7.791	9.432	7.619	7.1	7.94	7.382	6.633	8.542	7.446	7.548	7.17	7.59	7.448	8.013	7.484	7.719	6.892	8.329	8.332	7.63	8.336	7.93	8.163	7.224	8.17	7.092	7.657	7.319	6.537	7.156	6.836	6.987	7.276	7.112	7.283
GNG5	GNG5	2787	1	84964005	84972262	1p22	NM_005274.2	NP_005265.1	7.987	10.424	9.071	9.779	8.691	9.53	9.652	10.764	9.538	9.234	9.538	9.103	9.289	9.728	9.027	9.526	9.303	9.077	9.138	9.097	9.67	8.988	8.959	9.495	9.585	9.418	9.471	9.725	9.609	9.043	9.837	8.852	9.325	8.797	8.982	9.422	9.074	9.714	9.281	9.069	9.342
CTBS	CTBS	1486	1	85018803	85040163	1p22	NM_004388.2	NP_004379.1	5.019	8.046	6.218	5.479	5.981	5.805	6.421	5.632	5.797	6.428	6.235	5.399	5.916	6.618	6.012	6.146	6.066	4.977	5.365	6.099	5.669	4.981	5.849	6.23	5.84	6.941	6.594	6.255	6.934	5.619	6.788	6.076	5.48	5.173	5.379	6.435	5.956	7.144	5.453	6.828	6.96
SSX2IP	SSX2IP	117178	1	85109389	85156240	1p22.3	NM_001166293.1	NP_054740.3	5.48	7.285	5.624	6.98	5.173	6.472	6.778	4.605	7.427	6.265	7.762	4.947	5.723	7.277	6.591	5.671	6.64	5.612	5.524	5.551	7.531	5.568	5.39	6.068	5.674	6.421	6.553	6.553	6.248	5.573	5.949	5.09	5.565	5.552	5.598	6.101	5.043	5.756	5.524	7.078	5.784
LPAR3	LPAR3	23566	1	85279085	85358896	1p22.3	NM_012152.2	NP_036284.1														7.151											5.384		7.092		6.933	5.696										5.709
MCOLN2	MCOLN2	255231	1	85391265	85462805	1p22	NM_153259.2	NP_694991.2		4.951			4.749	5.277	5.584		6.248		5.788			5.334	6.337		5.949							5.728	5.306	5.329	6.118	6.797	7.075	5.762	5.933	5.932	5.959	5.833	4.444			5.336	4.437	4.89
MCOLN3	MCOLN3	55283	1	85483764	85514223	1p22.3	NM_018298.10	NP_001240622.1					4.715									5.609	5.332		4.512									4.486	9.271	5.814	7.251		4.857	4.877	5.934	6.13							4.574
WDR63	WDR63	126820	1	85527980	85598821	1p22.3	NM_145172.3	NP_660155.2																										4.713	7.732					5.628
SYDE2	SYDE2	84144	1	85623355	85666728	1p22.3	NM_032184.1	NP_115560.1	7.237	7.024	5.414	5.547	6.129	6.96	5.566		5.296	4.609	4.754	4.974	4.912	5.345	6.647	5.482	6.186			4.914	5.121	5.144			6.098	5.281	4.909	6.515	4.538	5.25	4.607		4.843	4.621	4.716	6.277	5.273	5.076	6.685	5.472	6.103
C1orf52	C1orf52	148423	1	85715636	85725355	1p22.3	NM_198077.3	NP_932343.1	6.356	7.897	6.674	7.153	6.267	7.084	6.917	8.969	6.96	6.936	7.199	5.732	6.581	7.066	7.166	6.756	6.636	6.722	6.752	6.845	6.85	7.056	5.978	6.963	7.095	6.564	6.948	7.614	6.718	5.925	7.02	6.167	6.734	6.338	5.662	6.574	6.388	6.625	7.635	6.849	6.552
BCL10	BCL10	8915	1	85731459	85742587	1p22	NM_003921.4	NP_003912.1	6.101	8.231	6.916	7.574	5.961	7.504	7.203	9.003	6.676	6.852	7.258	6.583	7.234	6.872	6.689	6.974	7.328	6.165	6.181	6.331	6.097	6.335	6.197	6.668	7.774	6.392	7.095	6.758	6.542	5.947	6.175	5.688	6.268	5.882	5.582	6.425	6.328	7.308	7.717	6.388	6.707
LOC646626	LOC646626	646626	1	85742040	85743771	1p22.3			4.703	5.544	4.66	4.868		5.364	4.727		4.882	5.157	4.656	4.566	4.947	4.866		4.923	5.086	4.454		4.576		4.609		4.913	5.278	4.458		4.638		4.867	4.622		4.47	4.592	4.587	4.833	5.046	5.367	5.467	4.588	4.925
DDAH1	DDAH1	23576	1	85784167	86044046	1p22	NM_012137.3	NP_036269.1	5.771	9.392	8.986	8.523	6.482	9.316	5.871	6.805	6.744	6.929	6.555	7.294	7.566	5.995	6.991	7.214	7.138	5.126		5.463		5.086	5.903		7.33			6.617		5.916	5.25	5.177	5.56	5.513	5.434	6.961	6.486	7.318	8.88	6.279	6.2
CYR61	CYR61	3491	1	86046443	86049648	1p22.3	NM_001554.4	NP_001545.2	5.927	11.687	11.146	10.833	7.092	10.884	8.124	12.14	9.264	8.499	8.528	5.066	5.226	6.075	6.479	5.343	5.655	5.121	4.883	4.99	5.124	5.15	5.084	4.687	9.236	4.713	5.599	9.756	5.06	6.076	5.68	5.594	6.16	5.641	7.204	8.53	9.142	9.297	10.818	8.301	7.764
ZNHIT6	ZNHIT6	54680	1	86115105	86174116	1p22.3	NM_017953.3	NP_060423.3	5.779	8.528	7.167	7.623	6.318	7.535	6.563	7.113	6.54	6.684	6.813	5.884	7.243	6.805	6.765	6.24	5.785	6.819	6.953	7.273	6.989	7.124	6.734	7.565	7.696	6.768	7.449	7.386	7.208	6.365	7.368	6.492	6.735	6.517	5.931	6.663	5.999	7.116	7.164	6.92	6.73
COL24A1	COL24A1	255631	1	86194915	86622121	1p22.3	NM_152890.5	NP_690850.2									4.586		4.58																	5.427
ODF2L	ODF2L	57489	1	86812506	86862025	1p22.3	NM_020729.2	NP_001171694.1		6.408	5.153	6.11		5.304		6.822	4.54	5.49	5.044		4.94	5.461	5.296	5.504		4.899	4.826	4.705		5.49		5.567	5.738	4.979	6.253	4.505	5.918	5.069	5.29	4.611	4.814	4.564		5.189	4.947	5.684		5.408	5.441
CLCA2	CLCA2	9635	1	86889768	86922240	1p22.3	NM_006536.5	NP_006527.1				4.481						7.558																													4.542
SH3GLB1	SH3GLB1	51100	1	87170252	87213867	1p22	NM_001206653.1	NP_057093.1	6.159	9.346	8.385	8.141	6.901	8.346	7.945	9.288	8.035	8.743	8.152	6.939	7.427	7.327	7.285	7.858	7.117	7.33	7.426	7.229	6.83	6.927	6.497	7.989	8.117	7.593	8.374	7.764	7.889	6.683	7.646	6.75	7.417	7.009	6.586	8.18	6.91	8.044	8.455	7.415	7.204
SEP15	SEP15	9403	1	87328127	87380107	1p31	NM_004261.3	NP_976086.1	9.598	11.413	10.472	10.132	9.682	10.58	10.686	10.498	10.288	10.58	10.558	10.56	10.612	10.496	10.226	10.762	10.651	10.214	10.54	10.622	10.34	10.47	10.489	10.569	10.667	10.667	10.541	10.477	10.644	10.01	10.63	9.814	9.891	9.717	9.559	10.47	10.006	10.618	10.514	10.568	10.333
HS2ST1	HS2ST1	9653	1	87380334	87575681	1p22.3	NM_001134492.1	NP_036394.1	7.403	8.93	7.563	7.942	7.394	8.031	8.11	6.729	7.459	8.463	7.82	7.192	7.892	7.743	7.814	8.623	7.905	7.623	8.188	7.435	8.169	7.56	6.927	8.275	8.092	7.853	8.127	7.577	8.461	7.346	8.348	7.47	7.466	7.328	6.781	8.481	6.986	7.818	7.529	9.273	7.577
LINC01140	LINC01140	339524	1	87595447	87634886	1p22.3			5.007	5.24	5.029	5.668	5.03	4.966	5.171		5.316	5.125	5.624	4.862	4.966	5.281	5.14	5.229	5.158	5.161	5.344	5.422	5.193	4.939	5.047	5.104	5.468	5.156	4.866	6.552	5.102	5.011	5.082	5.298	4.793	5.019	5.243	5.977	5.09	5.432	5.084	5.696	5.222
LMO4	LMO4	8543	1	87794150	87814607	1p22.3	NM_006769.3	NP_006760.1	5.035	6.506	6.957	8.528	7.082	6.057	6.317	5.044	6.679	6.618	7.3	5.014	5.553	5.747	5.949	7.492	6.131	5.719	5.195	6.36	5.486	4.794	5.605	5.69	6.102	5.577	6.489	6.227	6.227	5.436	5.393	5.809	5.932	5.896	5.668	7.744	5.537	6.171	6.028	5.081	5.593
PKN2	PKN2	5586	1	89149921	89301938	1p22.2	NM_006256.2	NP_006247.1	7.496	9.38	8.108	8.092	7.641	8.699	8.096	7.168	8.274	8.151	7.965	7.318	8.041	8.593	8.579	8.833	8.651	7.566	7.444	7.152	6.919	7.416	6.854	7.512	8.618	8.095	8.514	8.101	8.196	7.833	8.561	7.369	7.753	7.475	7.551	8.46	7.382	8.013	8.524	8.494	8.804
GTF2B	GTF2B	2959	1	89318320	89357301	1p22-p21	NM_001514.5	NP_001505.1	6.794	8.761	7.27	7.799	7.316	7.98	8.084	6.82	7.772	7.545	8.151	7.745	8.376	8.433	8.151	8.011	8.035	7.893	8.416	8.345	8.221	8.265	7.857	8.535	8.391	8.069	8.001	8.375	8.209	7.685	8.442	7.5	7.396	7.286	7.01	7.793	7.168	7.609	8.173	7.564	7.782
CCBL2	CCBL2	56267	1	89401455	89458643	1p22.2	NM_001008661.2	NP_001008662.1	7.071	8.584	6.095	6.39	7.585	8.527	7.384	8.238	7.608	7.778	6.969	6.619	8.395	7.387	8.717	7.698	7.923	6.741	7.625	8.208	7.092	7.778	6.125	7.942	7.226	8.07	7.904	6.221	7.535	6.323	7.436	5.609	6.938	6.674	5.903	7.041	6.564	8.142	7.132	7.278	7.406
RBMXL1	RBMXL1	494115	1	89445138	89458643	1p22.2	NM_019610.5	NP_062556.2	6.716	8.183	6.498	6.862	6.942	7.396	6.877	6.237	6.657	7.145	7.017	6.52	7.09	6.723	7.187	7.523	6.049	6.843	6.65	7.692	7.204	6.833	6.269	7.14	7.334	6.964	7.737	8.117	7.337	6.746	7.063	7.199	7.335	6.873	5.621	6.062	6.142	6.528	6.863	6.914	6.868
GBP3	GBP3	2635	1	89472359	89488549	1p22.2	NM_018284.2	NP_060754.2		7.475	6.307	4.989		6.692	6.688	8.348	4.747	6.874	5.302	5.708	5.781		5.256	6.422	5.499		4.721			5.164	4.684	4.757	5.598	5.838	6.617		5.172		4.596		5.025	4.722		4.959	5.398	6.038	8.181		5.757
GBP1	GBP1	2633	1	89517986	89531043	1p22.2	NM_002053.2	NP_002044.2		7.098	6.221	8.365		5.269	6.915	9.667	4.575	7.779	5.361					5.261			4.543			5.679	4.446	5.703	4.718		5.653	4.649	4.616			5.067	4.723				4.553	4.642	6.764
GBP2	GBP2	2634	1	89571815	89591842	1p22.2	NM_004120.4	NP_004111.2		5.783		4.742		4.424	6.99	6.345	5.009	7.031	5.407	5.757				5.437								7.166		4.421	6.025		4.457			4.751	5.412	4.734		6.528		5.56	4.68		4.505
GBP7	GBP7	388646	1	89597433	89641723	1p22.2	NM_207398.2	NP_997281.2		5.72	4.957	6.439		7.018	7.622			4.975		4.555	4.701	4.565	4.831	7.637	5.018		4.805		4.562	6.516	5.507	6.71	5.801	4.997	5.256	4.554	5.005		4.513	4.459					4.436		5.443	4.537
GBP4	GBP4	115361	1	89646830	89664633	1p22.2	NM_052941.4	NP_443173.2		5.027		5.583		6.876	7.252									7.121			4.693			6.335	4.779	5.789	4.635		4.466		4.479										4.94
GBP5	GBP5	115362	1	89724633	89738544	1p22.2	NM_001134486.2	NP_001127958.1				5.171				4.608	6.439		6.893								4.557						5.013
GBP6	GBP6	163351	1	89829435	89853719	1p22.2	NM_198460.2	NP_940862.2	4.427				4.471	4.424							4.475				4.627		4.506				4.467												4.421		4.561				4.687
GBP1P1	GBP1P1	400759	1	89873237	89890493	1p22.2						4.451			4.886				4.598
LRRC8B	LRRC8B	23507	1	89990396	90063420	1p22.2	NM_001134476.1	NP_001127948.1	6.486	4.937	4.675	5.428	6.478	5.491	4.895		5.308	6.193	5.882	6.201	7.524	6.924	6.802	7.472	7.143	6.386	6.256	6.769	6.935	6.043	5.706	5.363	6.362	7.265	5.177	5.214	5.335	5.634	6.568	4.989			5.889	6.112	4.734	4.629	5.195	6.551	6.768
FLJ27354	FLJ27354	400761	1	90090407	90098453	1p22.2																												5.319			4.557		5.429
LRRC8D	LRRC8D	55144	1	90286572	90401989	1p22.2	NM_018103.4	NP_001127951.1	7.36	9.432	7.856	8.291	7.122	9.102	8.551	6.923	9.015	7.992	9.112	8.479	8.621	7.277	7.942	7.792	7.961	8.098	8.336	9.067	7.921	7.934	8.255	7.483	8.302	9.092	8.943	7.981	8.411	8.282	8.781	7.897	8.894	8.258	8.653	8.055	7.455	6.939	9.473	7.276	8.638
GEMIN8P4	GEMIN8P4	492303	1	90458823	90460525	1p22			5.752	6.341	5.709	6.103	6.515	6.264	6.106		6.59	6.085	6.749	7.077	6.669	6.435	6.054	6.63	6.594	6.562	6.654	6.392	7.044	6.292	6.623	6.332	6.094	6.841	6.942	6.642	7.172	6.851	7.831	6.588	6.989	6.593	6.678	6.574	5.647	6.066	6.157	6.462	7.003
ZNF326	ZNF326	284695	1	90460677	90494094	1p22.2	NM_182975.2	NP_892021.1	6.557	7.586	6.739	7.665	6.482	7.858	7.247	6.304	7.566	7.428	7.143	7.748	7.705	7.222	7.756	7.463	7.279	7.605	7.647	7.742	7.048	7.791	6.396	7.763	7.682	7.8	7.883	7.666	7.53	7.565	8.184	7.057	7.399	7.433	6.814	6.91	6.614	6.826	7.195	7.526	7.151
LOC149351	LOC149351	149351	1	91069691	91089877	1p22.2			4.581	5.332	5.296	4.746			4.636		4.786	5.355	4.888		5.61	5.31	4.906		4.43	5.513	4.696	4.437	5.972		4.551	4.53	5.688	5.304	6.097	6.033	6.217	6.002	6.976	5.434	5.914	6.085	5.1	4.741	4.516	5.45	4.82	4.624	4.614
BARHL2	BARHL2	343472	1	91177578	91182794	1p22.2	NM_020063.1	NP_064447.1	6.358	6.373	6.455	6.398	6.16	5.834	6.182		6.305	5.983	6.375	6.423	6.001	5.889	5.863	6.002	6.227	6.287	6.247	6.627	6.716	6.457	6.257	5.895	6.29	5.944	5.844	6.228	6.333	6.28	6.198	6.073	5.762	6.311	6.503	6.557	6.314	6.465	6.591	6.173	6.339
PHKA1P1	PHKA1P1	646780	1	91358512	91359483	1p22.2			7.448	8.466	6.878	5.549	7.316	8.56	8.593		7.742	6.355	8.129	7.696	8.142	8.672	9.002	8.847	9.175	9.03	7.901	6.264	7.792	8.52	7.941	9.886	4.747	5.883	5.889	5.768	7.947	8.417	6.908	8.865	9.156	8.862	9.166	8.864	8.63	9.18	5.703	9.055	8.276
ZNF644	ZNF644	84146	1	91380856	91487812	1p22.2	NM_201269.2	NP_115562.3	6.579	7.689	7.107	7.355	6.494	7.298	6.875	7.573	7.156	7.306	7.199	6.417	7.027	7.526	7.69	7.455	7.141	7.308	7.402	7.466	6.692	7.408	6.791	7.773	7.428	7.25	7.705	7.467	7.34	6.98	7.707	6.232	7.13	6.579	5.964	6.84	6.25	6.788	7.099	7.487	7.228
RPL5P6	RPL5P6	646784	1	91489431	91490423	1p22.2			7.712	8.524	7.814	8.205	7.745	8.053	7.735		8.179	7.872	8.332	7.967	7.586	8.148	7.976	7.872	8.486	8.101	8.476	8.764	8.453	8.266	8.322	8.22	8.443	7.488	8.123	8.412	7.991	8.007	7.685	7.933	7.485	7.977	7.853	7.995	7.834	8.129	7.954	7.731	7.811
HFM1	HFM1	164045	1	91726322	91870426	1p22.2	NM_001017975.3	NP_001017975.3																		4.664			4.87						4.554	4.834	4.987	5.216	4.976		4.971
FEN1P1	FEN1P1	645931	1	91793794	91795819	1p22.2			6.696	6.744	6.571	6.687	7.102	6.807	6.442		6.838	6.854	6.382	7.936	6.831	7.291	7.278	7.407	6.538	6.688	6.728	7.027	7.031	6.93	7.6	7.281	7.407	6.813	6.81	6.635	6.29	6.995	6.864	6.56	7.724	7.286	6.447	6.016	6.569	5.654	6.593	6.229	6.356
CDC7	CDC7	8317	1	91966403	91991321	1p22	NM_001134420.1	NP_003494.1	6.692	7.12	5.535	6.184	5.708	6.659	6.547	4.799	5.932	6.647	5.665	6.339	6.926	7.105	7.458	6.932	6.46	6.798	6.862	7.135	7.181	6.948	5.741	7.065	6.661	6.674	7.14	6.438	6.474	6.272	7.123	6.212	7.045	6.5	5.894	6.426	6.042	6.335	5.668	7.218	6.93
HSP90B3P	HSP90B3P	343477	1	92100567	92109334	1p22.1			7.173	7.501	7.683	7.553	7.527	7.824	7.371		7.538	7.353	7.458	8.277	7.333	7.662	7.715	7.694	7.99	6.916	6.989	7.81	7.358	6.771	8.013	7.012	7.672	7.943	7.118	7.571	7.478	7.5	8.112	8.301	7.137	6.855	7.148	7.455	7.684	7.245	7.468	7.828	7.367
TGFBR3	TGFBR3	7049	1	92145899	92371559	1p33-p32	NM_001195683.1	NP_001182612.1	5.04	5.966	6.079	7.202	4.975	5.759	5.417		4.751	6.865	4.931	8.722	5.675	6.029	7.93	7.177	7.61	7.195	4.64	4.605	7.661	4.518	6.671	5.078	6.438	8.182	8.273	7.268	8.558	6.883	8.315	6.743	7.726	7.485	6.496	6.452	5.258	6.522	6.25	7.329	6.611
BRDT	BRDT	676	1	92414927	92479985	1p22.1	NM_001242806.1	NP_001229737.1
EPHX4	EPHX4	253152	1	92495532	92529093	1p22.1	NM_173567.4	NP_775838.3		6.13					4.78		4.78		5.043	5.68			5.044		4.838	5.236																				4.778			5.273
BTBD8	BTBD8	284697	1	92545861	92613401	1p22.1	NM_183242.3	NP_899065.2		5.329											5.517	4.744	5.514		5.191								4.434			4.424													4.536
GAPDHP46	GAPDHP46	100240711	1	92580195	92581388	1p22.1			8.434	8.154	8.458	8.589	7.753	8.913	9		8.98	8.524	9.148	8.611	8.643	8.757	8.626	8.473	9.192	8.774	8.868	8.701	8.225	8.717	8.769	8.936	9.258	8.826	8.83	8.905	8.739	8.883	8.477	9.161	8.802	8.759	8.896	8.881	8.87	8.359	8.848	9.033	9.233
KIAA1107	KIAA1107	23285	1	92632608	92650280	1p22.1	NM_015237.2	NP_056052.2	4.502	5.144			4.594		4.564					4.712	5.755	4.812	5.627	4.498	5.368	4.516							4.662			4.464			4.511						4.434				4.611
GLMN	GLMN	11146	1	92711954	92764566	1p22.1	NM_053274.2	NP_444504.1	5.398	6.982	5.53	6.304	5.541	6.601	5.829	5.128	5.617	6.137	5.741	5.35	6.232	6.387	6.248	5.767	6.118	5.982	6.339	7.062	6.098	6.556	5.327	6.855	6.556	5.67	6.596	5.878	5.96	5.377	6.223	5.174	5.785	5.678	5.139	5.995	4.822	5.676	5.995	6.547	6.01
RPAP2	RPAP2	79871	1	92764521	92853732	1p22.1	NM_024813.2	NP_079089.2	5.85	7.334	6.329	6.374	5.93	7.115	6.786		6.612	6.937	6.396	6.3	6.725	7.147	7.466	6.214	6.542	6.739	6.534	7.101	6.385	6.715	6.377	7.351	6.945	7.128	7.319	6.716	7.015	6.15	7.1	5.955	6.01	6.04	5.795	6.642	5.702	6.551	6.884	6.918	6.107
GFI1	GFI1	2672	1	92940317	92952433	1p22	NM_005263.3	NP_001120688.1	5.268	5.068	4.962	5.031	5.005	4.929	5.289		5.072	4.949	5.179	5.199	5.018	5.662	5.867	4.944	5.063	5.619	7.552	9.288	5.218	7.711	5.672	5.633	5.325	4.882	4.839	4.978	5.013	5.332	4.969	5.055	4.969	5.275	5.089	4.935	5.058	5.078	5.092	5.17	5.099
EVI5	EVI5	7813	1	92974252	93257961	1p22.1	NM_005665.4	NP_005656.4	5.315	8.239	7.157	6.051	5.767	7.578	6.883	6.117	6.407	7.386	6.557	5.357	6.363	6.602	6.613	5.782	5.979	6.093		5.165	5.765		5.412	5.113	7.179	7.331	7.435	7.651	7.109	6.694	7.027	6.523	6.67	6.329	5.711	6.862	6.195	7.261	6.878	6.204	5.643
HMGB3P9	HMGB3P9	100873879	1	93134069	93134651					6.063	5.046	4.715	4.566	5.225			4.589	5.735			5.049	4.481	4.94	4.86		5.343		4.515	4.558		4.489		4.498	5.23	6.161	5.843	5.53	4.681	5.749	4.728	4.792	5.101			4.746	5.271	4.889	4.47
RPL5	RPL5	6125	1	93297593	93307481	1p22.1	NM_000969.3	NP_000960.2	6.163	7.446	6.366	6.97	6.482	6.933	5.908		6.287	6.318	6.143	5.455	6.653	6.916	6.941	6.824	5.917	6.735	6.58	6.737	6.291	7.003	6.043	8.215	6.41	6.154	6.737	6.727	6.514	6.493	6.661	5.97	6.45	6.673	5.924	6.255	5.768	6.064	6.315	6.448	6.004
FAM69A	FAM69A	388650	1	93298285	93427079	1p22.1	NM_001252270.1	NP_001006606.2		7.621	7.71			6.408	6.992	8.401	7.666	8.436	6.645	6.566	5.251	5.529			5.267	5.335	5.879			4.993	5.417	5.123	6.122	6.796	5.702	6.081	6.455	6.569	6.492	5.153	6.093	5.689	5.727	4.727	4.74	5.991	4.87	5.772	4.823
SNORA66	SNORA66	26782	1	93306275	93306408	1p22.1			8.439	8.844	8.184	8.829	7.844	8.315	7.794		8.4	8.215	8.685	7.299	8.731	8.223	8.769	8.464	7.68	9.03	8.599	8.811	8.507	9.103	8.252	9.52	7.814	7.481	8.975	7.958	7.951	8.257	8.44	7.852	8.452	8.336	7.959	8.108	7.855	8.276	8.239	8.587	8.095
MTF2	MTF2	22823	1	93544791	93604638	1p22.1	NM_001164392.1	NP_001157864.1	6.733	8.584	7.077	7.657	6.933	7.78	7.203	7.051	7.357	7.248	7.758	7.176	7.893	8.049	7.681	7.74	7.656	7.742	9.427	8.252	8.428	9.119	7.081	8.215	7.886	7.454	7.655	7.858	7.365	6.924	7.932	6.713	6.657	6.547	6.714	7.226	6.941	7.154	7.355	8.31	7.126
TMED5	TMED5	50999	1	93615298	93646246	1pter-q31.3	NM_016040.4	NP_057124.3	7.62	10.184	8.778	9.292	8.381	9.363	8.969	8.349	8.815	9.777	9.226	8.809	9.361	8.69	8.744	8.973	8.832	8.581	8.644	8.697	9.089	8.305	8.892	8.962	9.623	8.633	8.938	8.929	8.774	8.265	9.286	8.279	8.536	8.27	7.952	8.959	8.431	9.536	9.166	8.755	8.655
CCDC18	CCDC18	343099	1	93646272	93744287	1p22.1	NM_206886.3	NP_996769.3	4.998	6.07	5.413	6.276	4.816	6.223	5.409		5.709	6.451	5.425	4.915	5.675	6.089	6.093	5.505	5.803	5.386	6.255	5.925	5.138	5.199	5.104	5.666	5.877	5.657	5.715	5.431	5.472	4.838	5.915	4.566	5.048	4.89	4.494	5.347	5.016	5.907	4.902	6.223	5.063
CCDC18-AS1	CCDC18-AS1	100131564	1	93775665	93811368	1p22.1			6.46	6.834	6.037	4.968	7.096	6.06	5.511		5.756	6.628	5.814	5.013	6.537	6.911	6.434	6.433	5.964	6.871	6.511	6.102	6.239	6.344	7.379	5.776	5.525	6.713	6.149	6.115	6.346	5.718	7.171	5.642	5.514	5.359	5.958	6.583	6.315	7.482	6.261	7.127	6.587
DR1	DR1	1810	1	93811477	93828148	1p22.1	NM_001938.2	NP_001929.1	7.258	9.681	8.898	8.628	7.834	8.989	8.697	8.064	8.698	8.427	8.812	7.765	8.347	8.517	8.557	8.172	8.236	8.195	8.716	8.555	8.761	8.438	8.631	8.604	8.886	7.864	8.163	8.632	7.929	7.746	8.337	7.297	8.423	8.111	7.379	8.054	8.067	8.262	8.631	8.433	7.886
FNBP1L	FNBP1L	54874	1	93913687	94020218	1p22.1	NM_001024948.2	NP_060207.2	7.042	7.757	7.192	7.418	7.603	7.837	5.923	6.461	6.841	5.854	7.714	7.67	8.181	7.657	8.175	7.88	8.394	8.118	5.857		4.937	6.331	5.71		7.343	7.185	6.889	7.489	7.806	7.799	8.278	6.384	7.577	7.101	6.836	8.016	5.911	6.691	6.799	7.093	7.451
BCAR3	BCAR3	8412	1	94027297	94312706	1p22.1	NM_001261410.1	NP_003558.1	6.129	8.772	8.285	8.554	7.716	8.429	7.504	7.131	7.136	7.387	7.285	6.754	6.361	6.944	6.225	7.448	6.361	6.174	5.196	5.262	5.275	5.215	5.149	5.125	8.16	7.144	7.333	7.215	7.405	6.967	7.414	6.286	7.224	6.935	6.788	7.079	7.481	7.584	8.35	5.794	7.192
LOC100129046	LOC100129046	100129046	1	94057524	94065587	1p22.1			5.114	5.465	5.179	5.432	5.222	5.198	5.091		5.079	4.997	5.28	6.657	7.096	4.917	6.502	6.262	5.925	7.909	5.12	4.839	5.132	5.292	5.663	4.874	5.101	4.797	5.141	5.002	5.124	5.229	5.02	4.9	5.376	5.156	5.281	5.001	5.104	5.253	5.323	5.065	5.207
DNTTIP2	DNTTIP2	30836	1	94335013	94344762	1p22.1	NM_014597.4	NP_055412.2	6.959	8.854	7.2	7.912	7.078	7.968	7.777	9.166	7.29	7.367	7.372	7.027	8.217	7.795	7.79	7.702	6.317	7.228	7.448	7.568	7.801	7.659	7.414	8.512	8.305	7.737	7.851	8.145	7.498	7.229	7.728	7.074	7.77	7.386	7.117	7.433	7.056	7.322	7.717	7.635	7.553
GCLM	GCLM	2730	1	94350755	94375154	1p22.1	NM_002061.2	NP_002052.1	5.372	7.463	6.877	6.596	4.906	6.442	7.646	6.548	8.265	7.78	7.313	5.8	7.852	6.053	5.891	6.033	5.64	5.335	5.942	5.728	6.651	5.981	5.634	6.965	5.958	5.39	6.824	6.436	6.221	6.683	6.27	5.356	5.989	5.783	7.945	6.597	6.109	6.495	8.005	6.828	7.084
CHCHD2P5	CHCHD2P5	100874508	1	94410016	94410416				7.841	8.328	9.012	8.498	8.769	8.749	8.929		8.734	8.117	8.035	8.987	8.81	8.518	8.392	8.501	8.99	8.836	8.769	8.781	8.954	8.66	9.782	8.915	8.776	8.401	8.534	9.148	8.65	9.016	8.798	9.027	8.9	8.113	7.994	8.759	8.301	8.679	8.129	8.768	8.525
ABCA4	ABCA4	24	1	94458393	94586705	1p22	NM_000350.2	NP_000341.2	4.6	4.539	4.596	4.68	4.506	4.585	4.617		4.521	4.524	4.598	4.62	4.493	4.546	4.434	4.472	4.546		4.607	4.431	4.532	4.679	4.566		4.5			4.429	4.539		4.755	4.547		4.763	4.424	4.452	4.546	4.578	4.782	4.569	4.79
ARHGAP29	ARHGAP29	9411	1	94634462	94703307	1p22.1	NM_004815.3	NP_004806.3	4.999	10.126	8.778	7.404	6.945	8.653	7.599	4.454	7.921	7.249	8.062			9.29	6.481	8.527	6.096	4.883	5.998			5.698						6.965	5.956	5.446	7.286	4.653	5.139	4.736	6.97	6.7	8.266	7.861	9.527	5.522	7.18
LOC100505940	LOC100505940	100505940	1	94713413	94800403				4.753	5.43	5.326	5.057	5.017	4.867	4.755		4.694			4.838	4.533	4.835		5.166	5.093	4.727	4.963	4.746	4.739	4.456	4.954	4.832		4.816	4.908	5.12	4.873	4.564	4.537	4.731	4.625	4.634	4.692		5.308	4.816	5.287	4.778	4.647
GAPDHP29	GAPDHP29	441893	1	94767525	94768782	1p21.3			10.579	10.091	10.575	10.063	9.515	10.927	10.991		10.588	10.715	10.768	10.681	10.67	10.766	10.535	10.446	11.089	10.575	10.649	10.469	9.915	10.319	10.661	11.061	11.326	11.027	10.867	11.054	10.746	11.002	10.482	11.314	11.011	10.704	10.459	10.456	10.951	9.722	10.428	10.865	10.754
ABCD3	ABCD3	5825	1	94883932	94984219	1p21.3	NM_002858.3	NP_001116146.1	7.478	9.543	8.685	7.95	7.805	8.772	8.462	8.551	9.014	8.841	8.519	9.078	8.248	8.474	8.661	8.64	8.004	8.195	8.642	7.96	7.02	8.411	7.213	7.868	7.777	8.211	8.581	8.292	8.224	7.519	8.501	7.06	8.092	7.6	7.898	8.888	7.511	8.14	7.537	7.904	7.984
F3	F3	2152	1	94994731	95007413	1p22-p21	NM_001993.4	NP_001171567.1		10.306	8.67		4.566	8.829	8.718	5.54	6.745	6.873	7.147	6.656	6.18	6.208	6.29	4.836	8.964	4.902	4.515	4.918		4.542			5.103		4.66	4.978	4.821	5.274	4.582	4.476	4.553	4.546	4.63	6.718	7.878	8.182	9.273	4.701	8.798
SLC44A3	SLC44A3	126969	1	95285897	95360803	1p21.3	NM_001114106.2	NP_001245269.1	4.538		4.527		5.404					4.755	4.484	7.841	7.042	5.598	6.584	6.177	7.956	6.749					4.542	4.978	4.421	5.918	5.111	5.098	5.808	5.317	5.244				4.712	6.764	4.556	4.695	4.639	4.731	6.693
CNN3	CNN3	1266	1	95362504	95392779	1p22-p21	NM_001839.3	NP_001830.1		9.793	8.747	8.663	8.702	10.033	8.703	10.783	9.659	9.133	9.4	5.594	4.843	7.94	8.961		7.374	7.657	5.681			5.275	5.687		8.312	8.525	9.309	8.628	8.245	6.133	8.21	7.602	8.022	7.416	6.557	8.519	9.021	8.941	9.161	5.861	7.522
LOC729970	LOC729970	729970	1	95393583	95428826	1p21.3				5.283		4.546		7.088	4.872	5.585	6.233	4.611	5.915				5.538			4.793									4.471	4.708			5.11			5.383		6.381	5.846	5.075	4.939		5.395
ALG14	ALG14	199857	1	95448278	95538507	1p21.3	NM_144988.3	NP_659425.1	6.305	8.157	7.171	7.176	6.731	7.624	7.758	6.033	7.112	7.062	7.652	7.99	7.008	6.962	7.514	6.644	6.258	7.559	7.045	7.037	6.688	6.955	6.457	7.321	7.023	7.579	7.895	7.541	7.261	7.193	7.417	6.426	6.939	6.659	6.491	7.069	6.316	6.942	7.645	6.079	6.48
TMEM56	TMEM56	148534	1	95558072	95663161	1p21.3	NM_001199679.1	NP_689700.1	4.479	6.836	4.596	6.72	5.847	5.82	5.251	5.842	6.111	5.574	6.074		4.487	6.208	6.648	4.971	6.479	5.98			6.94			4.802		6.418	5.179	6.28	5.505	6.788	6.021		6.427	6.221	6.771	7.188	4.655	5.446	5.427		5.648
TMEM56-RWDD3	TMEM56-RWDD3	100527978	1	95583478	95710509	1p	NM_001199691.1	NP_001186620.1	5.145	5.158	4.458	5.531					5.166		4.659		5.007	4.66	6.204	4.765					5.215				5.229						5.037	4.732	4.545	5.602	5.025	6.112		4.71	4.689
RWDD3	RWDD3	25950	1	95699710	95712781	1p21.3	NM_001128142.1	NP_001121614.1	5.054	6.394	5.281	6.054	5.982	6.117	5.385	6.65	5.961	6.603	6.486	4.587	5.405	6.026	6.061	5.783	5.461	6.038	6.068	5.153	6.237	6.328	4.968	5.742	5.841	6.009	6.384	5.617	5.927	5.725	6.436	5.185	5.925	5.651	5.648	6.258	5.185	6.196	5.967	5.518	5.468
LOC100996630	LOC100996630	100996630	1	95799739	95807074										4.629													4.472			4.892									4.959		4.606						4.488	4.437
FLJ31662	FLJ31662	440594	1	95940292	95944912	1p21.3					4.755	4.664	4.61				4.527	4.664	4.59		5.041	4.45	4.988	4.558	4.86	4.729	5.066	4.566	4.633	4.752							4.788			4.901		4.646	4.738			4.953		4.889	4.743
LOC100996635	LOC100996635	100996635	1	95975671	95981020																			4.424			4.437																						4.544
EEF1A1P11	EEF1A1P11	440595	1	96912485	96914178	1p21.3			4.601	5.44	5.154	5.408	4.519	5.046	4.903		5.194	4.508	5.062	5.003	5.428	5.246	4.988	5.066	5.663	5.271	5.246	6.385	5.401	4.993	6.143	5.335	5.743	4.866	4.727	5.674	5.566	5.699	5.236	5.4	5.805	5.896	4.652	4.836	5.191	4.991	5.201	5.317	5.247
NDUFS5P2	NDUFS5P2	100286918	1	97049962	97050342	1p21.3			5.244	4.463		4.881	4.799	4.949	4.832		5.47	5.087	4.843	4.903	5.381	5.709	4.51	4.968	4.868			5.559	5.579	4.933	5.744	5.477	5.541	4.518	4.881	5.005	4.775	4.694	5.587	4.958	4.77	4.759	4.539	6.24	4.795	4.752	4.848	5.13	4.937
PTBP2	PTBP2	58155	1	97187160	97280605	1p21.3	NM_021190.2	NP_067013.1	6.795	8.399	7.487	7.785	6.701	7.867	6.514	5.941	7.47	8.026	7.318	6.459	6.756	7.741	8.002	7.68	7.042	7.895	8.331	7.298	7.032	8.146	6.085	7.438	7.482	7.332	8.041	7.458	7.104	6.951	7.823	6.358	6.82	6.721	6.788	7.031	6.679	7.503	7.169	7.716	6.823
DPYD	DPYD	1806	1	97543299	98386615	1p22	NM_001160301.1	NP_001153773.1		9.368	8.138	6.948		8.803	8.155	7.569	8.622	9.164	7.828	4.777		5.159	4.764	5.591	5.275		8.067	5.791		7.994	7.318	8.355	8.222		7.029	6.792		5.054		6.735	7.58	7.171	5.368	7.129	6.616	7.533	7.611	4.459	7.413
SEC63P1	SEC63P1	100420341	1	98011256	98012515				5.813	6.199	6.652	6.997	6.247	6.8	6.274		6.16	6.44	5.961	6.257	6.413	5.805	6.274	6.076	6.22	6.358	6.219	7.056	5.973	5.675	6.697	6.748	6.732	6.729	6.114	5.961	6.788	6.314	6.285	6.604	6.568	6.259	5.523	6.803	5.893	6.154	6.391	6.4	5.979
LOC729987	LOC729987	729987	1	98676266	98738214	1p21.3				4.982		4.655		4.834			4.913																			4.927										5.278
SNX7	SNX7	51375	1	99127235	99226056	1p21.3	NM_015976.4	NP_057060.2		8.813	7.763	8.013		8.142	7.737	9.095	9.148	7.648	8.385	7.199	7.044	6.999	7.162	7.066	6.585	6.101						7.867	7.705	6.66	8.011	7.156	6.891	6.047	6.791	5.73	7.267	6.962	6.487	7.378	6.378	7.767	6.833	6.049	6.977
PLPPR5	PLPPR5	163404	1	99355800	99470449	1p21.3	NM_001010861.2	NP_001032394.1
LOC100129620	LOC100129620	100129620	1	99469831	99614408	1p21.3			4.855		4.612		4.915				4.512			4.59	4.435			5.241	4.954							4.7	4.598										5.115	4.495	5.034		4.937
PLPPR4	PLPPR4	9890	1	99729847	99775138	1p21.2	NM_001166252.1	NP_055654.2			6.231			6.521	5.135		5.337		7.59			4.421													6.601													4.7
PALMD	PALMD	54873	1	100111430	100160097	1p22-p21	NM_017734.4	NP_060204.1					4.513		4.433			7.962											4.535															6.695				7.158	4.721
FRRS1	FRRS1	391059	1	100174258	100231349	1p21.2	NM_001013660.2	NP_001013682.2	6.035	5.251	7.223	5.555	7.115	5.621	6.28		5.844	5.31	7.063	7.753	8.476	7.418	6.931	7.367	7.265	6.764	6.244	6.681	8.227	5.491	5.808	7.156	7.236	6.905	8.362	5.409	7.112	6.47	7.231	6.839	7.646	7.076	5.303	6.151	5.96	5.577	4.494	6.312	7.385
AGL	AGL	178	1	100315639	100389579	1p21	NM_000643.2	NP_000635.2	6.581	6.492	6.219	5.77	7.233	7.004	6.82	7.021	6.679	6.922	6.834	7.464	7.823	7.708	7.082	7.39	7.859	7.609	7.085	6.506	7.201	7.291	5.523	6.635	6.663	7.076	7.38	6.918	6.672	6.796	7.058	5.909	6.64	6.554	6.037	7.335	5.658	6.333	6.428	6.992	6.993
SLC35A3	SLC35A3	23443	1	100435344	100492534	1p21	NM_012243.2	NP_036375.1	6.321	7.363	6.986	6.636	6.637	6.649	6.31	5.584	6.431	6.559	6.345	6.28	7.884	6.708	7.276	7.201	8.389	6.386	6.671	6.143	6.24	6.462	5.866	6.585	5.565	6.25	6.27	6.474	6.147	6.191	6.586	5.189	5.736	5.368	5.672	6.48	5.077	6.738	7.322	6.804	7.348
MFSD14A	MFSD14A	64645	1	100503788	100548929	1p21.2	NM_033055.2	NP_149044.2	8.362	9.594	8.992	9.124	8.642	9.228	8.863	7.894	8.769	9.044	8.908	8.543	9.395	8.427	9.368	9.706	8.961	8.832	9.187	9.047	8.742	9.122	8.979	9.791	9.259	9.148	9.624	8.997	8.751	8.873	9.13	8.311	8.771	8.414	8.344	9.429	8.107	9.061	9.548	9.249	9.049
SASS6	SASS6	163786	1	100549100	100598651	1p21.2	NM_194292.1	NP_919268.1	6.699	7.541	6.514	7.032	6.747	7.432	6.879		6.888	6.653	6.643	6.971	7.309	7.642	7.581	7.431	6.858	7.122	7.556	7.294	7.251	7.189	6.815	7.766	7.002	6.735	7.167	7.241	6.603	6.847	7.102	5.938	7.321	6.868	6.186	7.039	5.695	6.771	6.599	7.275	7.101
TRMT13	TRMT13	54482	1	100598705	100616054	1p21.2	NM_019083.2	NP_061956.2	6.142	6.568	6.516	6.496	6.508	6.812	6.744	6.784	6.106	6.849	5.794	6.372	6.677	6.771	6.853	6.679	6.451	6.87	7.013	6.8	6.982	6.815	6.566	6.919	7.251	6.718	7.133	7.127	5.875	5.656	6.663	5.804	6.729	6.477	5.676	6.498	5.908	7.032	6.254	6.586	6.039
LRRC39	LRRC39	127495	1	100614003	100643829	1p21.2	NM_001256386.1	NP_001243316.1																														5.128	4.908
DBT	DBT	1629	1	100652477	100715409	1p31	NM_001918.3	NP_001909.3	6.742	6.901	6.612	6.633	7.46	7.325	7.091		6.532	7.522	6.921	7.524	7.613	7.449	7.508	7.118	7.373	7.155	6.615	6.872	6.7	6.581	6.855	7.144	7.415	7.719	7.365	7.113	6.553	6.384	7.323	6.674	6.923	6.691	6.043	6.769	6.106	6.714	7.045	6.84	6.887
RTCA	RTCA	8634	1	100731713	100758325	1p21.2	NM_001130841.1	NP_003720.1	5.865	8.166	7.366	8.01	5.89	7.519	7.734	6.714	7.517	7.527	7.648	7.025	7.246	7.242	7.459	7.148	6.97	7.34	7.396	7.087	7.537	7.193	6.882	7.896	8.028	7.781	7.988	7.717	7.529	7.252	8.008	6.752	7.267	7.289	6.468	7.281	6.656	7.9	7.884	7.192	6.768
CDC14A	CDC14A	8556	1	100818022	100985833	1p21	NM_033312.2	NP_201569.1	4.839	6.55	5.367	4.994	5.644	6.304	5.304		5.118	5.525	4.854	5.101	5.945	6.009	6.408	5.481	6.905	6.44	6.2	6.231	7.674	5.901	4.934	5.638	6.527	5.63	6.343	6.265	5.434	5.796	5.813	5.751	5.886	5.73	5.023	6.119	5.246	5.939	4.937	6.236	5.236
BCAS2P2	BCAS2P2	100421045	1	100858591	100859213				7.693	6.476	6.023	6.403	5.609	6.463	6.17		7.231	5.896	6.146	6.032	5.743	6.072	5.565	5.969	6.012	6.292	5.943	5.974	6.242	5.731	5.943	6.511	6.057	5.543	6.423	7.19	6.475	6.041	6.243	5.98	5.682	5.768	5.373	5.748	5.701	5.715	6.456	5.967	5.919
VCAM1	VCAM1	7412	1	101185195	101204601	1p32-p31	NM_001199834.1	NP_542413.1							4.567	5.123		9.621																											8.203	9.489
EXTL2	EXTL2	2135	1	101337927	101360735	1p21	NM_001261440.1	NP_001028197.1	4.81	6.679	6.14	5.796	5.268	6.163	6.128	8.032	6.157	6.773	6.364	5.789	6.02	6.58	6.498	6.054	5.813	6.252	6.326	5.818	5.967	5.779	5.891	5.979	7.258	6.71	7.153	7.082	6.536	5.686	6.664	5.42	6.849	6.43	5.281	6.659	5.055	6.309	5.21	6.671	5.435
SLC30A7	SLC30A7	148867	1	101361631	101447311	1p21.2	NM_133496.4	NP_598003.2	6.726	8.593	7.718	7.553	7.39	8.136	8.415	6.265	7.624	8.261	7.704	7.395	7.787	7.48	7.826	8.223	7.44	7.179	7.665	7.521	6.561	7.391	7.103	8.439	8.42	7.967	8.285	8.853	8.089	7.462	8.318	7.327	7.97	7.693	6.564	7.721	7.186	7.627	8.18	8.071	7.17
DPH5	DPH5	51611	1	101455179	101491362	1p21.2	NM_001077395.1	NP_001070863.1	7.124	8.058	7.227	7.162	7.176	7.576	8.081	6.048	7.482	7.286	7.87	7.373	8.334	8.124	7.362	7.138	7.963	7.816	7.861	7.746	8.48	8.302	7.508	7.504	8.637	8.102	7.531	8.256	7.668	8.196	8.331	7.406	6.923	6.965	7.686	7.806	7.57	7.744	7.608	8.205	7.318
S1PR1	S1PR1	1901	1	101702304	101707076	1p21	NM_001400.4	NP_001391.2		4.722		5.019		6.023			4.728	4.851	5.31								5.672			5.711	4.479	9	4.987					4.593									5.069
PPIAP7	PPIAP7	5489	1	101736181	101737050	1p21.2			5.906	6.077	5.93	5.931	5.454	5.726	6.528		6.349	5.986	5.824	6.338	6.417	5.89	5.772	6.363	5.869	6	6.43	6.14	6.183	5.983	6.195	6.285	6.188	5.623	5.895	6.377	5.604	5.978	5.857	6.468	5.796	5.235	5.738	5.535	5.998	6.298	6.07	6.272	5.974
RPSAP19	RPSAP19	730029	1	102251821	102252853	1p21.1			10.624	10.451	10.772	10.464	10.203	10.791	10.22		11.023	10.133	10.374	10.463	10.501	10.893	10.649	10.021	10.965	10.471	10.474	11.079	10.733	10.504	11.215	10.806	11.084	10.194	10.462	10.522	10.29	10.683	10.208	10.573	9.927	10.047	10.39	9.789	10.641	10.072	10.529	10.353	9.998
OLFM3	OLFM3	118427	1	102268122	102462790	1p22	NM_058170.2	NP_477518.2
COL11A1	COL11A1	1301	1	103342022	103574052	1p21	NM_001190709.1	NP_542196.2	4.75	4.734	4.944	4.764	4.664	4.768	5.057		7.641	9.419	8.767	4.844	4.653	4.494	4.581	4.624	4.748	4.66	4.796	4.829	4.792	4.87	4.991	4.516	4.766	7.488	4.533	5.618	7.032	4.635	7.213	4.699	4.573	4.744	4.777	4.817	4.797	4.896	4.854	4.911	4.696
RNPC3	RNPC3	55599	1	104068577	104097859	1p21	NM_017619.3	NP_060089.1	6.888	7.266	6.084	7.075	7.07	6.791	7.049		7.354	7.372	6.948	7.025	7.054	7.399	7.456	7.53	7.084	7.331	7.579	8.068	6.858	7.635	7.256	7.171	7.385	7.332	7.856	7.933	7.54	6.961	7.479	6.463	7.068	6.836	6.16	6.834	6.172	6.995	7.087	6.974	6.676
AMY1A	AMY1A	276	1	104198140	104301311	1p21	NM_001008221.1	NP_004029.2	4.841	5.74	5.613	5.472	5.223	5.216	5.18		4.862	5.164	5.344	4.746	4.8	5.009	5.731	5.25	5.246	5.389	4.764	5.316	5.266	5.154	5.46	5.235	5.25	4.983	4.979	5.229	5.17	4.822	5.5	5.298	4.666	5.526	5.107	4.869	4.989	5.584	5.282	4.905	5.254
LOC100129138	LOC100129138	100129138	1	104615644	104619693	1p21.1						4.637	4.781		4.534			4.47		4.612									4.656				4.888			8.099									4.677
PRMT6	PRMT6	55170	1	107599266	107601916	1p13.3	NM_018137.2	NP_060607.2	8.912	5.762	4.916	6.097	6.44	6.384	6.236	5.605	5.877	6.482	6.729	6.267	6.737	5.43	6.201	6.216	5.398	6.296	6.087	6.887	7.074	6.253	5.544	6.618	7.135	5.445	6.237	7.385	6.417	5.298	6.342	6.63	5.899	5.448		6.433	5.433		5.54	6.668	6.526
NTNG1	NTNG1	22854	1	107682539	108027521	1p13.3	NM_001113228.1	NP_055732.2		5.748		4.6					4.538	7.324	5.423														6.377			4.671		4.721							4.819		7.067		4.988
VAV3	VAV3	10451	1	108113781	108507545	1p13.3	NM_006113.4	NP_001073343.1	4.918				7.918					4.749									8.356	6.528		7.174				4.438			6.939		5.902	4.943	5.435	5.167	4.854
SLC25A24	SLC25A24	29957	1	108677343	108742980	1p13.3	NM_013386.4	NP_037518.3	8.552	10.226	8.157	8.932	8.051	8.741	7.766	9.367	7.716	7.769	7.715	7.67	8.766	8.003	9.002	8.897	8.962	7.634	6.55	6.789	7.374	6.732	7.663	8.434	9.139	7.817	8.774	8.404	8.301	7.332	8.228	7.847	7.842	7.373	7.71	8.474	8.075	8.918	8.536	7.772	7.971
NBPF4	NBPF4	148545	1	108765962	108786703	1p13.3	NM_001143989.2	NP_001137461.1	5.16		4.433	4.634	4.665						4.555						4.439	7.384	4.484		7.46		4.53		4.747			4.725			4.596	4.78		6.422		4.509		4.557		4.441	4.512
LOC101060442	LOC101060442	101060442	1	108912511	108959616				4.827																	5.981			5.315							5.932		4.784
LOC400768	LOC400768	400768	1	108963258	108975896	1p13.3			5.679	4.787	4.726	4.88	5.023		4.679		4.691		4.89	4.619	4.449				4.564	6.62	4.724	4.695	7.185	4.868	5.056	4.433	5.215	4.47		6.137	4.687	5.116	5.357	5.496	4.591		4.619	4.654	4.656	4.571	4.591	4.454	4.623
ST13P21	ST13P21	642818	1	109045000	109046073	1p13.3			5.466	5.478	6.497	6.137	5.47	5.6	6.181		6.088	6.086	6.012	5.82	5.948	6.188	5.839	5.727	5.584	5.847	6.039	6.019	5.992	5.981	6.452	5.532	5.926	5.415	6.012	7.091	6.385	5.928	6.107	6.448	5.994	5.639	5.52	5.636	6	5.851	5.938	6.123	6.145
FAM102B	FAM102B	284611	1	109102970	109181949	1p13.3	NM_001010883.2	NP_001010883.2	9.286	8.801	7.041	6.446	6.541	7.361	7.436	5.878	7.252	6.328	6.811	7.865	7.066	7.14	6.389	6.184	8.284	5.563	6.327	6.468	7.428	6.354	5.264	6.111	6.92	8.704	6.819	9.104	9.534	6.742	7.674	6.738	6.177	5.8	6.516	8.306	6.527	6.83	6.472	6.749	6.519
HENMT1	HENMT1	113802	1	109190909	109204148	1p13.3	NM_144584.2	NP_001096062.1	6.483			5.684								6.729	5.864		6.615	6.068			6.929	5.542		7.442		5.977	5.741			4.595	6.26							5.943	4.644			7.381	6.043
PRPF38B	PRPF38B	55119	1	109234931	109244422	1p13.3	NM_018061.2	NP_060531.2	7.36	7.459	6.599	6.946	6.319	7.083	6.568	5.074	6.59	6.882	6.559	6.476	7.01	7.169	7.37	7.04	6.701	7.207	7.719	7.443	7.326	7.684	6.743	7.997	7.293	7.01	7.62	8.183	7.783	6.678	7.371	6.846	6.991	6.802	6.082	6.409	5.995	6.297	6.854	7.252	6.614
STXBP3	STXBP3	6814	1	109289284	109352148	1p13.3	NM_007269.2	NP_009200.2	8.131	8.055	7.687	7.349	7.147	8.06	7.797		7.474	7.755	7.243	7.703	8.068	7.628	7.937	7.624	7.754	7.294	7.214	7.321	7.416	7.236	6.918	8.194	7.753	8.157	8.226	8.776	8.398	7.248	7.934	7.742	7.427	7.1	6.615	7.308	6.41	7.63	7.885	7.808	6.983
AKNAD1	AKNAD1	254268	1	109358519	109400864	1p13.3	NM_152763.4	NP_689976.2		4.528		4.494	4.586	4.64	4.921		4.436		4.599	4.56		4.429	4.429		4.423	4.551							5.202			5.241				4.676	4.422			4.574				4.502
GPSM2	GPSM2	29899	1	109419602	109473044	1p13.3	NM_013296.4	NP_037428.3	7.854	8.406	7.244	7.81	6.845	7.828	7.067	6.926	7.773	7.968	7.258	6.96	7.629	7.31	8.352	7.304	7.523	6.713	6.365	6.68	6.548	6.49	5.617	6.712	6.782	6.973	8.057	7.765	7.497	6.542	7.169	6.359	7.185	7.138	6.248	6.72	6.084	7.63	6.311	7.169	7.5
CLCC1	CLCC1	23155	1	109472129	109506121	1p13.3	NM_015127.4	NP_055942.1	7.6	8.222	7.63	7.733	6.807	8.08	7.614	5.851	7.673	8.098	8.067	5.297	7.271	6.886	7.739	7.179	6.726	6.298	5.215	7.489	8.172	5.6	7.7	5.892	7.372	7.002	7.811	8.402	7.679	6.777	7.556	7.632	7.222	7.088	7.206	7.945	6.589	7.195	7.804	7.953	6.937
WDR47	WDR47	22911	1	109512837	109584850	1p13.3	NM_014969.5	NP_055784.3	6.841	8.308	7.489	8.143	6.274	8.106	7.772	5.895	7.661	7.923	7.603	6.053	6.907	6.898	7.043	5.852	6.573	6.581	6.678	6.625	6.261	6.911	5.977	7.528	7.284	7.292	8.099	7.444	8.271	6.581	7.461	7.486	7.081	7.168	6.112	6.707	6.359	7.449	7.053	7.347	6.246
RANP5	RANP5	100129428	1	109589435	109590101	1p13.3									4.665					4.792			4.46		4.457	4.495	4.47		4.689		4.512	4.805	4.435			4.694		4.687				4.864	4.46	4.887
TAF13	TAF13	6884	1	109606997	109618624	1p13.3	NM_005645.3	NP_005636.1	7.96	9.344	9.074	8.859	7.106	8.7	8.991	9.825	8.705	8.858	8.792	7.234	8.162	7.438	7.631	7.029	6.998	6.81	6.242	6.76	8.357	6.714	6.299	8.206	9.167	7.84	8.514	10.502	9.272	7.761	8.338	9.009	8.671	8.291	6.539	8.558	7.494	7.763	8.762	8.78	7.941
TMEM167B	TMEM167B	56900	1	109633402	109639554	1p13.3	NM_020141.3	NP_064526.1	7.819	8.684	8.508	7.759	7.746	8.597	8.89	7.565	7.65	8.196	8.201	7.768	7.902	7.318	7.277	7.475	7.495	6.877	7.429	7.485	8.42	7.803	7.227	7.764	8.161	7.464	7.997	9.119	8.69	7.387	7.92	7.844	7.51	7.385	6.304	7.524	7.344	8.051	7.994	7.647	7.419
SCARNA2	SCARNA2	677766	1	109642814	109643234	1q13.1			9.132	9.171	8.269	8.565	8.64	8.971	8.428		8.487	8.784	8.784	8.539	9.115	9.116	8.918	8.637	9.093	8.893	8.576	9.6	9.432	9.148	8.97	8.779	8.552	8.87	8.714	9.567	9.517	8.484	8.839	9.314	8.65	8.375	8.185	8.291	8.496	9.088	8.917	9.128	8.25
C1orf194	C1orf194	127003	1	109648572	109656479	1p13.3	NM_001122961.1	NP_001116433.1					5.947
KIAA1324	KIAA1324	57535	1	109656584	109749403	1p13.3	NM_020775.4	NP_001253978.1	8.261	4.43			9.153	4.771	4.719		4.538		4.709	5.442					6.461											4.926								4.5			5.583	4.502
SARS	SARS	6301	1	109756514	109780804	1p13.3	NM_006513.3	NP_006504.2	8.446	10.233	9.382	9.161	8.097	9.387	8.578	7.006	8.502	8.931	8.861	8.463	8.761	8.957	8.93	8.666	9.176	9.357	8.55	7.977	9.278	8.298	7.79	8.888	8.862	8.351	8.913	9.4	9.031	8.422	8.888	9.023	8.208	8.222	7.798	8.301	8.167	8.485	9.442	8.664	7.956
CELSR2	CELSR2	1952	1	109792640	109818378	1p21	NM_001408.2	NP_001399.1	8.396	7.108	6.229	6.382	7.757	6.979	6.64		7.563	7.98	7.916	6.306	7.021	7.223	7.357	6.69	6.846	6.912	6.623	6.213	7.427	6.578	6.451	6.449	6.207	7.997	7.74	7.423	7.014	6.938	7.975	6.664	6.613	6.664	6.87	7.73	6.39	6.229	6.644	6.938	7.034
PSRC1	PSRC1	84722	1	109822175	109825790	1p13.3	NM_001005290.3	NP_001027462.1	8.617	9.126	7.668	8.151	6.558	8.731	7.59	6.039	8.673	8.273	8.794	6.901	7.465	7.745	8.107	7.612	7.828	7.559	7.597	7.257	7.68	7.478	6.19	7.681	7.807	7.317	8.017	8.596	8.11	7.42	8.03	7.926	7.897	8.115	7.252	7.036	7.507	8.114	7.014	8.09	7.003
MYBPHL	MYBPHL	343263	1	109834986	109849663	1p13.3	NM_001010985.2	NP_001252542.1												4.44													4.525
SORT1	SORT1	6272	1	109852187	109940567	1p13.3|1p21.3-p13.1	NM_002959.5	NP_002950.3	8.406	9.44	8.015	5.914	8.679	9.561	6.489	5.897	8.959	8.21	8.66	7.882	8.099	7.315	8.451	8.308	8.197	7.766	8.002	4.587	8.98	7.9	7.377	6.527	5.546	9.753	8.856	10.068	10.176	8.148	9.632	7.804	8.166	8.028	6.584	8.398	7.34	7.519	7.302	6.423	8.59
PSMA5	PSMA5	5686	1	109941652	109969108	1p13	NM_002790.3	NP_001186703.1	8.862	9.612	8.268	8.622	8.298	9.014	9.1	7.526	8.961	8.256	9.217	8.816	9.194	8.953	8.844	9.28	8.789	8.477	8.903	9.01	9.434	9.144	8.768	9.482	9.257	8.586	9.281	10.177	9.547	8.537	9.012	9.131	8.623	8.682	8.283	8.645	8.397	8.514	8.91	9.166	8.521
SYPL2	SYPL2	284612	1	110009099	110024764	1p13.3	NM_001040709.1	NP_001035799.1	5.054	5.201	5.049	5.16	5.211	5.428	5.222		5.264	5.089	5.079	5.039	4.846	5.586	5.156	4.942	5.095	5.082	4.982	5.037	5.308	5.043	4.952	5.011	4.795	5.254	5.03	5.061	5.07	5.039	5.061	5.237	4.948	5.67	5.006	5.065	5.223	5.133	5.114	5.305	4.957
ATXN7L2	ATXN7L2	127002	1	110026560	110035420	1p13.3	NM_153340.4	NP_699171.3	7.147	6.608	6.28	7.032	6.256	6.625	6.73		6.507	6.556	6.712	6.441	6.887	6.876	6.945	6.645	6.748	7.033	7.042	7.017	6.997	7.43	6.489	7.481	6.917	6.639	6.783	6.774	6.627	6.328	6.598	6.647	6.861	6.522	6.057	6.346	6.06	6.385	6.326	7.088	6.253
CYB561D1	CYB561D1	284613	1	110036657	110043063	1p13.3	NM_001134403.1	NP_872386.1	7.047	7.122	6.743	6.394	6.726	6.504	6.743		6.871	7.212	6.806	7.097	6.89	6.539	6.81	7.107	6.187	6.712	6.707	6.713	6.269	6.526	5.909	6.58	7.145	7.332	7.339	7.571	7.1	6.388	7.025	6.793	6.907	6.569	6.147	6.478	5.985	6.99	6.671	6.328	6.384
AMIGO1	AMIGO1	57463	1	110049445	110052336	1p13.3	NM_020703.2	NP_065754.2	6.022	7.236	5.187	5.378	6.453	4.803	4.84		6.001	5.002	5.592	5.668	6.25		6.607	5.203	5.453	5.282	5.15	5.518	5.019	5.047	5.666	5.571	5.51	5.559	6.187	5.725	5.88	5.469	5.028	5.325	5.693	5.788	5.185	6.059	5.12	5.64		6.326	4.864
GPR61	GPR61	83873	1	110082493	110088455	1p13.3	NM_031936.4	NP_114142.3	7.482	7.522	7.767	7.606	7.783	7.055	7.577		7.371	7.397	7.759	7.276	7.23	7.257	7.17	7.29	7.655	7.281	7.509	7.749	7.569	7.442	7.282	6.933	6.788	6.394	6.938	6.801	7.203	7.109	6.801	7.093	6.64	7.406	7.613	7.449	7.312	7.949	7.596	7.43	7.748
GNAI3	GNAI3	2773	1	110091185	110138454	1p13	NM_006496.3	NP_006487.1	9.309	10.201	9.616	9.685	8.907	9.831	9.576	10.302	9.904	9.496	9.569	8.92	9.356	9.585	9.116	9.218	9.077	9.227	8.962	9.01	9.383	8.928	8.274	9.809	9.842	8.661	9.405	10.529	9.647	8.847	9.414	8.831	9.008	8.818	8.583	8.9	8.83	9.235	9.347	9.457	8.651
RNU6V	RNU6V	6071	1	110133926	110134261	1p13			7.875	7.29	6.917	7.115	7.551	7.377	7.605		7.498	8.246	7.609	7.973	7.43	7.485	7.333	7.437	7.72	7.287	7.364	7.653	7.648	7.827	6.878	7.377	7.609	7.061	6.735	6.876	7.32	6.909	7.026	7.212	7.477	7.205	7.342	7.211	7.613	7.294	8.181	7.151	7.227
GNAT2	GNAT2	2780	1	110145888	110155705	1p13.1	NM_005272.3	NP_005263.1																									4.455
AMPD2	AMPD2	271	1	110162434	110174677	1p13.3	NM_203404.1	NP_001244290.1	7.649	8.252	8.265	8.057	7.361	7.898	8.431	7.077	7.815	8.28	8.47	7.372	7.903	7.812	7.935	7.52	7.473	7.59	8.001	7.875	7.883	8.081	7.393	7.899	8.649	7.6	8.141	9.167	8.53	7.575	8.052	8.744	8.249	8.119	7.364	7.852	7.674	7.903	8.262	8.68	7.271
RPL7P8	RPL7P8	441896	1	110193984	110194479	1p13.3			8.565	8.428	9.564	9.248	8.78	8.582	8.267		8.541	8.276	8.151	9.381	8.653	9.282	8.818	8.726	8.391	8.82	8.806	9.225	8.74	8.823	8.859	8.779	9.452	8.497	8.447	8.977	8.601	9.511	8.805	9.08	8.732	8.774	8.596	7.745	9.168	8.418	8.206	8.987	8.366
GSTM4	GSTM4	2948	1	110198697	110208123	1p13.3	NM_147148.2	NP_000841.1	6.323	7.437	6.297		6.381	6.253	5.888		7.257	5.067	7.542	6.96	6.592	5.656	7.266			5.518	5.091	6.631	6.35	5.454	5.573	7.126	5.444	7.565	7.46	7.596	7.315	7.436	7.231	6.628	7.296	7.472	5.487	6.848	6.121	6.579		6.533	4.497
GSTM2	GSTM2	2946	1	110210643	110226619	1p13.3	NM_000848.3	NP_001135840.1	5.162	7.534	5.644	4.991	8.515	7.742	6.569		7.534	5.552	7.513	5.722	5.595	5.433	6.533			5.1	5.415	5.736	6.014	7.522	5.007	6.018	4.982	8.108	6.453	7.712	8.294	6	7.171	7.487	5.583	5.269	5.339	7.3	6.309	7.798	4.433	7.765
GSTM1	GSTM1	2944	1	110230417	110236367	1p13.3	NM_146421.2	NP_666533.1	5.516	7.297	6.623	4.44	6.212	6.286	5.416		6.355	4.65	6.714	5.711	5.491	4.781	5.729			4.799	5.08	5.516	5.611	7.091	5.126	7.008	4.697	7.445	5.831	6.748	6.844	6.68	6.202	5.976	5.875	6.374	4.895	6.846	5.43	6.424		7.888
GSTM5	GSTM5	2949	1	110254863	110260890	1p13.3	NM_000851.3	NP_000842.2	5.891	6.524	6.12	5.342	6.506	6.211	5.859		6.212	5.267	6.361	6.566	6.171	5.671	6.344	5.213	5.262	5.631	5.455	6.083	5.642	6.385	5.23	6.448	5.307	6.6	6.044	6.41	6.344	6.131	6.218	6.234	6.215	6.025	5.534	6.38	5.677	6.128	5.066	7.003	4.906
GSTM3	GSTM3	2947	1	110276553	110283660	1p13.3	NM_000849.4	NP_000840.2	7.113	8.382	5.794	5.936	9.73	7.634	7.094		7.335	6.918	7.416				8.313							5.399				5.685	5.735	6.561	5.528	5.035	6.146	5.772	6.061	5.836	4.974	5.77	5.273		6.625	6.404	4.678
EPS8L3	EPS8L3	79574	1	110292701	110306644	1p13.3	NM_133181.3	NP_078802.2	5.523	5.382	5.319	5.238	5.359	5.197	5.351		5.41	5.212	5.411	8.678	8.665	5.18	6.31	8.324	6.488	8.832	5.35	5.474	5.445	5.415	5.314	5.102	5.237	5.091	5.255	5.206	5.331	5.178	5.276	5.3	5.088	5.268	6.019	5.206	5.478	5.318	5.227	5.322	5.228
CSF1	CSF1	1435	1	110453232	110473616	1p13.3	NM_000757.5	NP_757350.1	5.533	9.043	8.326	7.087	5.852	6.916	8.308	6.19	7.443	9.059	6.912	5.475	6.27	5.933	6.563	5.881	5.371	5.259	6.256	5.282	6.185	5.443	5.569	5.763	6.454	6.06	5.743	6.576	5.294	6.214	6.335	6.345	5.804	5.949	6.731	6.572	7.73	8.191	8.498	6.853	5.434
AHCYL1	AHCYL1	10768	1	110527386	110566364	1p13.2	NM_001242676.1	NP_006612.2	7.358	8.665	8.522	7.557	8.253	8.577	8.759	8.565	8.534	8.7	9.149	7.974	8.621	8.271	8.801	8.196	8.56	8.111	8.058	7.612	8.262	7.693	7.132	7.593	8.056	7.845	8.363	9.3	9.254	9.093	9.127	8.281	7.603	7.433	8.127	8.269	8.245	8.39	8.824	8.399	8.458
STRIP1	STRIP1	85369	1	110574198	110597263	1p13.3	NM_033088.3	NP_001257697.1	7.472	8.092	7.262	7.601	7.294	8.069	7.461	5.412	7.278	7.606	7.291	7.036	7.542	7.562	7.678	7.563	7.214	7.686	7.438	7.539	7.64	7.644	6.792	7.802	7.683	7.502	7.85	8.539	7.81	7.328	8.04	7.563	7.328	7.186	6.707	7.423	6.804	7.147	7.738	7.651	7.067
ALX3	ALX3	257	1	110602996	110613322	1p13.3	NM_006492.2	NP_006483.2	5.657	6.036	6.103	5.878	5.418	5.433	5.576		6.039	5.872	6.066	5.356	5.622	5.245	5.228	5.535	5.51	5.6	6.316	6.097	6.169	6.033	5.749	5.423	5.549	5.646	5.901	5.718	5.721	5.914	6.157	6.134	5.893	5.63	6.102	5.995	6.052	6.04	6.091	5.591	5.883
SLC6A17	SLC6A17	388662	1	110693131	110744823	1p13.3	NM_001010898.2	NP_001010898.1	5.163	5.241	5.218	5.132	6.424	4.949	5.121		5.227	4.998	5.218	5.335	5.077	7.443	4.924	5.146	5.27	5.036	5.313	5.235	5.245	5.249	5.255	5.021	7.629	6.442	6.851	6.519	6.885	6.632	8.978	5.632	5.105	5.273	6.027	6.47	5.178	5.239	5.794	7.793	5.147
KCNC4	KCNC4	3749	1	110753335	110776674	1p21	NM_004978.4	NP_004969.2	5.49	6.079	5.645	5.18	5.745	5.652	5.307		5.382	5.525	5.153	5.573	6.589	6.328	6.25	5.067	5.962	6.093	6.255	6.039	5.441	5.824	5.398	5.884	6.058	5.863	6.895	6.462	6.024	6.05	6.392	6.401	5.7	5.852	5.735	6.275	5.488	5.45	7.247	5.883	5.032
LOC100506257	LOC100506257	100506257	1	110772525	110774041	1p21-p13			5.496	6.624	5.532	5.472	6.124	6.059	5.767		5.609	5.787	5.373	5.726	6.893	6.904	6.006	4.922	6.447	6.675	6.596	6.274	5.657	6.465	5.3	6.261	6.254	6.377	7.444	6.888	5.957	6.514	6.639	6.695	6.349	6.065	6.047	6.541	5.999	5.478	7.459	6.149	5.514
RBM15	RBM15	64783	1	110881944	110889303	1p13	NM_022768.4	NP_073605.4	8.586	9.054	8.051	8.549	8.29	8.623	8.102		8.292	8.642	8.227	7.839	8.413	8.874	8.977	8.807	8.223	8.696	8.983	9.122	8.716	8.892	8.122	9.052	8.287	8.283	8.995	9.17	8.779	8.141	8.926	8.35	8.39	7.994	7.79	8.222	7.694	8.129	7.982	8.865	8.2
SLC16A4	SLC16A4	9122	1	110905472	110933704	1p13.3	NM_004696.2	NP_001188475.1	4.44	4.487	5.172		4.646		8.164		4.705	5.617	7.05	6.597	4.677			5.364	4.634	4.448								8.287	6.708	7.964	6.888	6.402	6.2	7.581	6.197	5.667	7.286		5.183	6.257		4.791
LAMTOR5	LAMTOR5	10542	1	110943876	110950546	1p13.3	NM_006402.2	NP_006393.2	8.583	9.537	8.448	8.673	8.286	9.018	9.27	9.494	8.774	8.345	8.893	8.606	9.024	8.856	9.019	8.63	8.865	8.394	8.546	8.457	8.953	8.715	8.466	9.201	9.016	9.693	9.525	10.665	9.902	9.159	9.545	9.377	8.667	8.334	8.522	8.991	8.106	9.188	8.998	8.83	8.417
LAMTOR5-AS1	LAMTOR5-AS1	101410535	1	110950430	110958896	1p13.3																															4.475											5.134
CYMP	CYMP	643160	1	111023387	111033891	1p13.3			4.504	4.826	4.658	4.83	4.617	4.436	4.871		4.829	5.037	4.838	4.915	4.772	4.753		4.677	4.72	4.51	5.467	4.512	4.747		5.05	4.845	4.583	4.473	4.696	4.748	4.791		4.464	4.63	4.775	5.004	4.765		4.68	5.186	4.953	4.95	4.452
LOC440602	LOC440602	440602	1	111030301	111032880	1p13.3			4.446	4.861	5.244	4.442	4.77	4.817	4.99		4.732	4.585	4.521		4.763	4.841		4.88	4.872		4.646	4.878		5.088	5.057		4.49		5.183			4.799	4.507	4.87		4.587	4.495	4.524	5.344	4.736	5.036	4.525	5.039
KCNA2	KCNA2	3737	1	111136201	111174096	1p13	NM_001204269.1	NP_004965.1										4.971																					4.452	6.324	4.435
KCNA3	KCNA3	3738	1	111196185	111217655	1p13.3	NM_002232.3	NP_002223.3																			7.055			6.702	7.555
NRBF2P3	NRBF2P3	643232	1	111390194	111391693	1p13.3			4.984	5.368	4.793	5.119	5.458	5.437	5.667		5.421	5.096	5.194	5.498	5.859	5.313	5.571	5.257	5.631	5.52	5.143	5.342	5.373	4.467	4.87	5.649	5.816	5.999	5.594	5.803	5.97	5.994	5.56	4.966	5.326	5.151	5.043	5.262	5.042	5.209	5.358	5.42	5.246
CD53	CD53	963	1	111413820	111442558	1p13	NM_001040033.1	NP_001035122.1																			9.013	7.946	8.847	8.926	8.04	10.033				4.422
LRIF1	LRIF1	55791	1	111489811	111506566	1p13.3	NM_018372.3	NP_060842.3	6.921	7.264	6.471	6.824	7.304	7.228	7.122	7.739	6.752	7.264	6.235	7.031	7.739	7.141	6.423	6.556	6.768	6.437	7.344	7.612	8.645		6.999	8.771	8.136	7.873	6.855	7.831	6.406	6.425	7.525	7.527	6.192	5.719	6.557	6.967	4.461	7.53	7.365	7.874	7.5
CCNT2P1	CCNT2P1	100418763	1	111550314	111558140				5.898	6.017	6.153	5.472	5.429	5.142	5.731		5.899	5.854	6.071	5.378	5.702	5.132	5.435	5.625	6.198	5.941	6.191	6.167	5.721	6.156	6.238	6.081	5.873	4.851	5.831	5.925	5.657	5.908	6.115	5.627	5.969	5.885	5.84	5.707	6.057	5.843	5.559	5.559	5.68
DRAM2	DRAM2	128338	1	111659953	111682838	1p13.3	NM_178454.4	NP_848549.3	6.945	8.089	6.89	7.782	7.326	6.924	7.337	5.326	7.283	7.696	7.184	8.199	8.132	7.489	8.064	7.877	8.381	7.647	7.231	7.787	7.588	6.715	6.477	6.957	7.341	8.126	8.126	7.752	8.414	7.149	7.709	7.04	6.898	6.795	6.607	7.391	6.55	7.088	7.552	7.619	7.372
CEPT1	CEPT1	10390	1	111682248	111727724	1p13.3	NM_001007794.1	NP_006081.1	7.699	8.327	7.38	7.807	7.753	7.798	7.75	6.459	7.451	7.687	6.922	8.052	8.513	8.221	8.278	7.685	7.344	7.578	8.839	7.99	7.867	7.979	7.416	7.964	7.795	7.505	7.904	8.318	7.966	7.104	8.055	7.681	7.203	7.227	6.384	7.56	6.877	7.313	7.717	7.946	7.248
DENND2D	DENND2D	79961	1	111728590	111747160	1p13.3	NM_024901.4	NP_079177.2	7.002	5.538	4.585	4.71	7.299	4.526	4.97		4.634	4.704	4.973	6.992	6.854	6.861	6.693	8.313	6.576	5.961	8.161	5.375	4.713	9.236	7.524	7.758	4.643	5.357	4.498	5.59	4.739	5.039	6.55	4.755	4.647	4.822	4.99	5.127	5.23	5.349	6.003	5.957	5.154
CHI3L2	CHI3L2	1117	1	111770280	111786062	1p13.3	NM_004000.2	NP_003991.2				5.417						5.098	4.557								8.744			9.292																	5.383
CHIAP1	CHIAP1	100420342	1	111793633	111799337				4.756	4.588	4.787	5.144	4.574				4.633	4.885	4.717	4.725	4.64	4.62	4.686	4.749	4.89	4.805	5.045	4.602	4.632	5.13	4.985		4.582	4.554		4.617	4.563	4.551	5.014	4.723	5.008	5.052	5.12	4.604	4.808	5.209	5.272	4.816	4.818
CHIAP2	CHIAP2	149620	1	111823145	111828730	1p13.2			6.153	6.125	6.009	6.059	5.908	5.705	5.629		6.236	6.12	6.057	5.764	5.872	5.518	5.917	5.857	5.846	6.102	5.899	6.119	5.782	6.028	5.612	5.447	5.485	5.453	5.908	5.411	5.832	5.864	5.948	6.002	5.647	5.644	5.947	5.643	6.015	5.915	5.916	5.849	5.962
CHIA	CHIA	27159	1	111833473	111863188	1p13.2	NM_021797.3	NP_001244930.1	5.283	5.471	5.533	5.659	5.237	4.969	5.44		5.563	5.203	5.588	5.756	5.23	5.251	4.998	5.353	5.427	5.33	5.591	5.584	5.578	5.494	5.655	5.179	5.228	4.904	5.233	5.493	5.113	5.426	5.248	5.597	5.193	5.665	5.352	5.202	5.233	5.152	5.325	5.018	5.356
PIFO	PIFO	128344	1	111889181	111895639	1p13.2	NM_181643.4	NP_857594.2					7.04									4.529
PGCP1	PGCP1	441897	1	111927140	111932473	1p13.2			6.635	6.577	6.635	6.647	6.355	6.304	6.192		6.779	6.403	6.74	6.17	6.078	6.1	6.218	6.469	6.312	6.438	7.109	6.69	6.768	6.942	6.813	6.127	6.217	6.351	6.498	6.552	6.509	6.509	6.587	6.758	6.252	6.608	6.429	6.362	6.554	6.548	6.505	6.177	6.377
OVGP1	OVGP1	5016	1	111956936	111970399	1p13	NM_002557.3	NP_002548.3	5.428	5.232	5.057	5.445	5.529	5.485	5.225		5.445	5.136	5.9	7.02	5.905	6.362	5.236	5.651	5.87	6.237	5.604	5.525	5.111	5.237	5.305	5.057	5.333	4.956	5.147	5.468	5.016	5.244	5.276	5.197	5.152	5.114	5.107	5.377	5.136	5.723	5.66	5.358	5.222
WDR77	WDR77	79084	1	111982511	111991930	1p13.2	NM_024102.2	NP_077007.1	9.039	9.773	8.654	9.505	8.658	9.526	9.236	5.826	9.158	8.572	9.392	9.169	9.135	9.089	9.309	9.384	8.805	8.806	9.312	9.046	9.898	9.47	9.044	8.965	9.749	8.614	9.332	9.87	9.588	8.725	9.467	9.439	8.897	8.798	8.865	9.193	9.126	9.197	8.864	9.917	8.709
ATP5F1	ATP5F1	515	1	111991742	112004525	1p13.2	NM_001688.4	NP_001679.2	10.409	10.425	9.758	9.961	9.889	10.113	10.044	12.461	10.323	9.745	10.06	10.365	10.239	10.255	10.153	9.879	10.056	9.774	9.886	10.625	10.603	9.726	9.649	10.116	10.598	9.951	10.397	10.805	10.805	10.177	10.578	10.518	9.721	9.662	8.929	10.086	9.165	9.772	9.829	9.88	9.56
C1orf162	C1orf162	128346	1	112016490	112021134	1p13.2	NM_174896.2	NP_777556.1	4.434	4.432	4.478	4.482		4.542			4.738	4.503			4.585	4.444	4.7	4.505	4.663		4.541	8.518	4.608	4.593	4.449				4.71			4.468	4.596	4.55		4.601			4.519	4.54	4.567	4.624
ADORA3	ADORA3	140	1	112042050	112046743	1p13.2	NM_000677.3	NP_001075445.1																				5.092											4.49
RAP1A	RAP1A	5906	1	112162404	112259317	1p13.3	NM_002884.2	NP_001010935.1	8.115	8.411	8.024	7.516	6.945	8.336	7.985	8.836	7.929	8.334	7.704	7.569	7.92	7.423	7.799	7.575	7.622	6.974	7.117	7.896	7.516	7.05	7.504	7.741	7.832	8.172	7.879	9.013	8.442	7.102	8.066	8.055	7.384	6.968	6.204	7.526	6.836	7.829	7.688	7.803	7.351
KRT18P57	KRT18P57	643329	1	112190849	112192218	1p13.2			6.562	5.953	5.794	5.324	6.665	5.779	5.662		5.546	5.359	5.58	6.372	6.051	6.024	6.108	6.581	6.413	6.25	5.382	5.436	5.761	5.139	5.258	5.684	5.788	5.457	5.908	5.736	5.286	5.644	5.48	5.157	5.701	5.383	6.44	5.9	5.912	5.55	6.731	5.419	6.459
FAM212B-AS1	FAM212B-AS1	100506343	1	112282462	112290420				5.094	5.152	5.075	4.878	5.533	5.272	4.726		5.132	5.05	5.368	4.795	4.881	5.002	4.699	4.817	5.072	5.212	4.926	5.322	5.372	5.067	5.061	4.867	4.975	5.021	5.139	5.048	4.78	4.764	4.979	5.745	5.075	5.071	5.052	5.018	5.237	5.179	5.22	5.182	4.963
DDX20	DDX20	11218	1	112298189	112310199	1p21.1-p13.2	NM_007204.4	NP_009135.4	7.613	7.964	6.625	7.087	6.677	7.585	6.713	5.757	6.769	6.656	6.81	6.451	7.071	7.037	7.393	6.785	6.558	6.613	7.237	7.492	7.45	7.209	6.397	7.229	7.522	7.038	7.421	8.537	7.663	6.701	7.263	7.299	6.839	6.595	6.119	6.898	6.067	6.332	7.306	7.487	6.359
KCND3	KCND3	3752	1	112318453	112531777	1p13.3	NM_172198.2	NP_751948.1	4.645		4.567							5.253							4.521			4.421				8.36				5.149				4.43							6.21
KCND3-IT1	KCND3-IT1	100874295	1	112396383	112399527																											4.497
KCND3-AS1	KCND3-AS1	100873995	1	112452278	112453552																											4.49
LOC100129406	LOC100129406	100129406	1	112740446	112740847	1p13.2			5.007	6.207	5.589	5.833	5.03	5.87	4.691		5.479	5.191	5.674	5.151	5.569	5.292	5.596	6.229	5.395	5.515	4.958	4.683	4.898	4.567	4.501	5.276	5.163	5.035	5.908	6.352	5.759	5.326	5.399	5.212	5.426	5.492	5.265	5.169	5.07	5.935	5.548	5.353	5.377
CTTNBP2NL	CTTNBP2NL	55917	1	112938799	113003786	1p13.2	NM_018704.2	NP_061174.1	6.28	7.587	6.925	7.018	5.34	7.283	6.521	6.571	6.864	6.78	7.047	6.442	6.915	6.426	6.443	7.486	6.84	6.073	4.927	4.683	4.601	5.317		5.988	7.103	6.58	6.836	7.794	6.713	6.014	6.415	6.62	6.502	6.309	5.901	6.46	6.099	6.715	7.203	6.672	6.628
WNT2B	WNT2B	7482	1	113009162	113063910	1p13	NM_004185.3	NP_078613.1	6.17	4.477		6.094										4.605																				4.68		4.423			5.458	4.477
ST7L	ST7L	54879	1	113066140	113162040	1p13.2	NM_138729.3	NP_620056.1	5.814	6.465	5.763	6.152	5.746	6.156	6.579		5.671	6.206	5.5	5.3	6.254	6.066	6.591	5.493	6.206	6.486	5.272	5.3	5.166	5.383	4.508	5.436	6.028	6.259	6.219	6.603	6.067	5.684	6.142	6.585	5.644	5.387	4.636	5.467	5.904	6.074	6.361	6.521	5.334
CAPZA1	CAPZA1	829	1	113162074	113214241	1p13.2	NM_006135.2	NP_006126.1	9.82	10.923	9.979	10.462	9.722	10.473	10.348	10.834	10.226	10.341	10.364	10.176	10.452	10.378	10.218	10.336	10.193	10.026	10.205	10.612	10.551	10.093	9.847	10.596	10.627	9.996	10.368	10.899	10.64	9.58	10.133	10.217	9.649	9.309	9.445	10.036	9.543	10.33	10.261	10.109	9.912
MRPL53P1	MRPL53P1	359752	1	113168493	113168846	1p13.2			4.879	5.002		5.145	4.846	5.282	4.904		5.548	4.78	5.383	5.463	5.868	5.052	5.553	5.683	5.677	4.913	5.166	4.663	5.535	5.274	5.735	5.906	4.976	5.064	5.127	4.728	5.209	5.607	5.712	4.807	5.466	5.739	5.259	5.302	5.443	5.525	5.019	4.81	5.168
MOV10	MOV10	4343	1	113216933	113243368	1p13.2	NM_001130079.1	NP_001123551.1	8.05	8.333	7.43	8.234	7.904	8.024	7.975	7.587	7.736	8.364	8.034	6.851	8.134	8.628	8.698	9.106	7.889	7.656	8.059	5.759	8.357	8.145	6.513	7.981	7.808	7.82	7.755	8.625	8.503	7.542	7.803	8.029	7.818	7.587	7.151	7.754	7.281	7.627	8.727	8.28	8.023
RHOC	RHOC	389	1	113243748	113250025	1p13.1	NM_001042678.1	NP_001036143.1	8.085	10.073	9.691	9.553	9.46	8.89	9.601	9.197	9.165	10.004	9.618	8.192	9.06	8.698	8.216	9.13	8.737	7.969	7.204	5.117	9.003	6.976	5.758	8.661	9.839	8.755	9.566	10.506	9.765	8.106	8.431	9.647	8.819	8.749	8.666	9.315	8.547	9.726	9.442	8.62	9.396
PPM1J	PPM1J	333926	1	113252615	113257950	1p13.2	NM_005167.5	NP_005158.5	5.602	5.076	5.347	5.485	7.252	4.547	4.755		4.842	4.661	4.68		4.753	6.34	5.52	5.182	5.413	5.193		4.746	5.882	4.585	4.532	4.666	5.443	5.685	4.653	6.536	5.839	5.202	4.787	5.861	4.877	5.346	4.85	5.222	4.684	4.968	5.236	5.424	5.345
FAM19A3	FAM19A3	284467	1	113263188	113269856	1p13.2	NM_182759.2	NP_877436.1	5.804	5.802	5.912	6.626	5.583	5.66	6.275		6.009	6.175	6.059	5.678	5.714	6.211	5.757	5.713	5.879	5.809	5.903	6.013	6.167	5.995	5.745	5.556	6.105	7.21	5.725	7.933	7.118	5.838	6.322	6.659	5.655	5.979	6.088	5.922	6.007	5.973	6.127	5.827	6.047
SLC16A1	SLC16A1	6566	1	113454469	113498975	1p12	NM_003051.3	NP_003042.3	5.586		8.035	8.117		8.201	7.716	6.798	8.366	8.106	8.703	4.907	7.949	7.879	8.221	7.507	8.515	8.051	7.948	8.09	8.562	7.589	7.713	8.651	7.866	7.047	7.477	8.225	8.604	6.865	7.755	8.082	7.287	6.985	6.606	7.071	6.946	7.816	8.509	7.22	6.652
AKR7A2P1	AKR7A2P1	246182	1	113465971	113467295	1p12			7.041	6.481	6.92	6.22	7.009	6.948	7.317		6.554	7.283	6.707	7.78	7.297	7.2	6.798	7.308	6.925	7.085	6.856	6.669	6.214	5.833	7.143	7.042	6.734	7.724	7.277	7.755	7.879	6.727	7.454	7.557	7.242	7.148	6.063	6.875	6.856	6.695	6.348	6.916	6.795
LOC100506392	LOC100506392	100506392	1	113499019	113511608	1p13-p12				4.457	6.215	5.921		6.117	5.622	4.582	5.418	6.098	5.442	4.441	5.8	5.374	5.405	5.52	4.823	5.604	5.98	5.274	5.951	5.639	5.618	6.052	5.571	5.535	6.094	7.019	6.328	5.487	5.961	5.898	5.98	6.087	5.128	5.026	5.393	5.868	5.987	5.573	4.718
LOC100996251	LOC100996251	100996251	1	113554308	113615724													4.514							4.482		4.652												4.468							4.677
LRIG2	LRIG2	9860	1	113615791	113667824	1p13.1	NM_014813.1	NP_055628.1	7.155	7.998	6.84	7.365	6.711	7.394	7.205	4.976	6.813	7.257	6.765	6.323	6.973	7.21	7.494	7.019	7.252	6.94	7.031	7.135	7.318	7.046	6.151	7.102	7.167	7.065	7.265	7.816	7.217	6.704	7.386	7.219	6.388	6.242	6.043	6.991	5.973	7.218	7.134	7.271	6.872
MAGI3	MAGI3	260425	1	113933474	114228545	1p12-p11.2	NM_152900.2	NP_690864.2	6.277	6.73	5.796	6.633	6.525	6.505	6.502	5.066	7.162	6.564	7.054	6.236	6.858	6.147	6.753	6.967	6.551	6.527	5.887	5.521	5.435	5.563	5.259	6.301	5.769	5.275	5.401	7.051	6.039	5.672	5.482	5.13	5.393	5.166	5.993	6.673	5.63	6.131	5.432	5.485	6.428
PHTF1	PHTF1	10745	1	114239823	114301777	1p13	NM_006608.2	NP_006599.2	6.535	7.71	6.25	6.764	5.499	6.969	6.785	6.349	6.909	7.158	7.547	6.197	5.952	5.942	6.218	6.267	5.404	6.512	4.925	5.66	6.236		6.108	6.455	6.428	7.063	7.836	7.971	7.782	6.522	7.238	6.763	6.427	6.519	5.691	6.902	6.415	6.263	7.025	6.72	5.222
RSBN1	RSBN1	54665	1	114304453	114355098	1p13.2	NM_018364.3	NP_060834.2	7.63	7.389	6.435	6.779	5.673	6.711	6.247	5.678	6.535	6.314	6.571	6.104	6.383	6.508	6.633	6.302	6.294	6.53	7.238	7.163	7.134	7.088	5.977	6.652	6.363	5.915	6.407	6.963	6.822	5.437	6.162	5.842	5.865	5.56	5.38	5.968	5.549	6.592	6.543	7.125	5.906
AP4B1-AS1	AP4B1-AS1	100287722	1	114355233	114443859	1p13.2			4.891
PTPN22	PTPN22	26191	1	114356432	114414381	1p13.2	NM_012411.4	NP_057051.3																		4.852	6.671	6.859		6.576		5.011	7.561													5.178
BCL2L15	BCL2L15	440603	1	114419435	114430169	1p13.2	NM_001010922.2	NP_001010922.1												7.155	5.873			4.769		4.425																		4.643
AP4B1	AP4B1	10717	1	114436816	114447746	1p13.2	NM_001253853.1	NP_006585.2	8.087	7.339	6.759	6.99	6.043	7.243	6.901	5.055	6.564	6.967	6.755	6.191	6.968	6.491	6.865	6.685	6.231	7.105	7.2	7.469	6.944	7.039	6.457	7.247	6.822	6.287	7.633	7.562	7.265	5.78	6.713	6.867	6.895	6.789	6.05	6.561	5.877	6.746	6.045	6.556	5.926
DCLRE1B	DCLRE1B	64858	1	114447914	114456708	1p13.2	NM_022836.3	NP_073747.1	8.328	7.634	6.333	6.48	5.654	6.781	6.523		6.451	6.422	6.339	5.975	6.407	6.191	6.197	5.928	6.332	5.94	6.408	6.367	6.688	6.411	5.826	6.487	6.816	6.171	6.649	7.016	6.575	5.953	6.323	6.269	6.452	6.322	5.7	6.12	5.686	6.235	6.043	7.018	5.675
HIPK1	HIPK1	204851	1	114471995	114520491	1p13.2	NM_198268.2	NP_852003.1	10.414	8.878	8.391	8.463	8.351	8.893	8.568	7.824	8.413	8.645	8.54	8.056	8.401	8.212	8.656	8.154	9.116	7.776	8.645	9.023	8.747	8.898	7.497	8.306	8.461	8.175	8.49	9.282	8.898	7.753	8.264	8.279	7.558	7.451	7.831	8.621	8.001	8.073	8.281	8.719	7.773
OLFML3	OLFML3	56944	1	114522012	114524876	1p13.2	NM_020190.2	NP_064575.1			6.937		8.847	5.042		9.387				5.981														5.352		6.334				7.044			6.447				5.037	4.542
SYT6	SYT6	148281	1	114631913	114696472	1p13.2	NM_205848.3	NP_995320.1	4.473	4.471	4.462									4.576				4.425		4.537								4.434	4.686	5.373	4.629	4.479	4.983	5.071			6.543					4.575
TRIM33	TRIM33	51592	1	114935398	115053781	1p13.1	NM_033020.2	NP_056990.3	9.084	7.979	6.65	7.18	6.73	7.514	6.676	5.309	6.899	7.027	7.049	6.582	7.283	7.531	7.662	7.781	7.279	7.493	7.857	7.138	7.462	7.745	6.399	7.355	6.91	7.377	7.484	8.517	8.053	6.92	7.686	7.383	7.059	6.731	6.3	6.788	6.262	7.171	7.185	7.555	6.846
EIF2S2P5	EIF2S2P5	347675	1	115010739	115012265	1p13.1				4.504	4.49			4.637						4.932				4.731	4.477						4.561	4.886	5.058				4.523		4.572	5.035								4.514
PKMP1	PKMP1	643586	1	115078591	115080076	1p13.2			10.421	10.653	10.611	10.477	10.325	10.994	11.146		11.329	10.651	11.268	11.118	10.712	10.773	10.506	10.912	11.154	10.528	10.061	10.226	9.803	9.289	10.854	10.867	11.214	11.096	11.291	10.973	11.03	10.756	10.823	10.938	10.838	10.648	10.881	10.923	10.871	10.401	11.079	10.647	10.986
BCAS2	BCAS2	10286	1	115110180	115124265	1p13.2	NM_005872.2	NP_005863.1	10.679	9.322	8.703	8.809	8.51	9.179	8.791	8.223	10.1	8.631	9.051	8.335	8.337	8.755	8.338	8.39	8.507	8.604	8.617	8.498	9.031	8.844	8.014	9.073	8.987	8.231	8.95	9.409	9.325	8.239	8.877	8.816	8.413	8.259	7.874	8.317	8.013	8.403	8.987	8.579	8.39
DENND2C	DENND2C	163259	1	115127195	115212732	1p13.2	NM_001256404.1	NP_940861.3	5.6	5.877	4.623		5.503	5.506			5.503	5.428				6.147	5.524									4.713	4.735	4.533		5.113	5.548	4.569		5.907						4.968	4.805	5.494	5.596
AMPD1	AMPD1	270	1	115215719	115238239	1p13	NM_001172626.1	NP_000027.2									7.987
NRAS	NRAS	4893	1	115247084	115259515	1p13.2	NM_002524.4	NP_002515.1	11.354	10.779	9.95	10.612	9.003	10.276	9.648	9.414	10.888	9.81	10.253	9.366	9.643	9.861	9.819	9.592	9.231	9.342	9.72	9.347	10.135	9.709	9.142	9.941	10.297	9.329	9.84	10.883	10.302	9.437	10.282	9.953	9.164	9.191	9.016	9.999	9.25	10.011	9.567	10.176	9.087
CSDE1	CSDE1	7812	1	115259533	115300671	1p22	NM_001242893.1	NP_001123995.1	12.064	11.209	11.056	9.807	10.139	11.229	10.732	10.699	11.408	11.01	10.761	9.97	10.619	10.811	10.842	10.454	10.408	10.367	10.688	10.886	10.669	10.817	10.191	10.678	10.79	10.351	10.626	11.517	11.246	10.256	10.753	10.96	10.073	9.866	9.812	10.736	10.269	10.675	10.697	11.142	10.651
SIKE1	SIKE1	80143	1	115312104	115323308	1p13.2	NM_001102396.1	NP_001095866.1	9.302	8.202	7.421	7.331	6.911	7.839	7.003	6.679	8.042	7.562	7.568	6.83	7.669	7.549	7.646	7.371	7.631	7.554	7.778	7.974	8.011	7.91	7.045	7.738	7.597	7.002	7.305	8.253	7.255	6.466	7.437	7.163	7.565	7.251	5.981	7.147	6.385	7.157	7.387	7.833	7.189
SYCP1	SYCP1	6847	1	115397423	115537990	1p13-p12	NM_003176.2	NP_003167.2
TSPAN2	TSPAN2	10100	1	115590632	115632121	1p13.2	NM_005725.4	NP_005716.2		5.299	5.387			6.289	4.425		6.255		5.964								4.918	4.481		5.296															4.635				4.945
NGF	NGF	4803	1	115828536	115880857	1p13.1	NM_002506.2	NP_002497.2		4.716	6.67	5.721		8.148																																	6.24
CNOT7P2	CNOT7P2	100132332	1	116107002	116108052	1p13.1			7.245	6.848	7.536	7.921	7.008	7.199	7.516		7.182	6.695	7.004	7.503	7.271	7.407	7.7	6.997	7.255	7.037	7.547	7.012	7.247	7.492	6.944	7.388	7.129	7.267	6.413	7.311	6.667	7.237	6.497	7.565	7.261	6.646	7.254	7.038	6.827	6.306	6.916	7.321	6.894
VANGL1	VANGL1	81839	1	116184573	116240845	1p13.1	NM_001172411.1	NP_620409.1	7.221	7.355	6.398	6.96	5.971	5.777	6.004	6.429	8.007	6.843	7.422	7.202	6.823	7.14	7.007	7.07	5.962	6.051	7.139	5.626	5.856	7.102	5.922	5.263	6.696	7.212	7.059	7.704	7.543	5.937	6.719	6.326	6.658	6.567	6.272	6.842	5.885	6.661	6.918	6.593	7.355
CASQ2	CASQ2	845	1	116242625	116311426	1p13.1	NM_001232.3	NP_001223.2										4.584	4.655	4.426														6.078		4.753	5.504		6.033										6.08
SLC22A15	SLC22A15	55356	1	116519118	116612675	1p13.1	NM_018420.2	NP_060890.2		5.633	4.627		4.954	6.751		6.127	5.786	5.471	5.218	4.784	5.793	5.842	5.972			6.229		7.096	4.574			6.308		6.117	6.833	5.837	7.254	5.509	6.741	5.564	6.25	5.955		4.466		4.476	6.036		5.266
MAB21L3	MAB21L3	126868	1	116654375	116677861	1p13.1	NM_152367.2	NP_689580.2												5.394																4.466	4.465
ATP1A1	ATP1A1	476	1	116915794	116947396	1p21	NM_000701.7	NP_001153705.1	9.658	9.979	9.155	9.285	9.011	9.637	9.451	8.913	10.764	10.241	10.219	10	9.841	9.627	9.697	9.47	10.364	9.651	8.694	9.573	9.622	8.836	9.403	9.503	9.698	10.712	11.272	10.266	11.084	10.701	10.977	10.449	10.637	10.443	8.646	9.121	9.577	9.657	9.108	9.311	9.562
ATP1A1-AS1	ATP1A1-AS1	84852	1	116935486	116961244	1p13.1			6.145	5.008			4.75	4.698	4.585			4.507		4.53	4.517	5.225	5.903	5.024	4.595	4.671		4.856	4.701	4.826	4.62		4.886	4.811	5.008	5.661	5.582		4.833			4.815		4.576		5.089		5.571	4.784
LOC100506459	LOC100506459	100506459	1	117035637	117041833				4.469			4.481					4.886	5.016	4.712					4.455	4.571	4.512	4.599		4.723	4.647	4.455		4.821	4.688	5.267	8.264	7.007	4.936	5.086	6.868	4.878	5.316		4.489	4.512	4.815	4.452	4.522
CD58	CD58	965	1	117057155	117113715	1p13	NM_001144822.1	NP_001770.1	6.057	8.01	7.323	7.265	5.821	7.53	7.123	8.582	8.624	8.518	8.452	7.183	6.973	6.904	6.773	7.775	7.114	7.008	6.976	5.623	7.482	6.805	5.574	6.967	6.819	8.495	8.087	8.136	7.813	7.386	7.949	7.7	7.083	6.589	6.215	7.459	5.89	7.35	6.901	6.812	7.166
NAP1L4P1	NAP1L4P1	728589	1	117075599	117076713	1p13.1			4.928	6.217	5.761	5.139	4.768	5.719	5.096		5.918	5.799	5.657	4.817	5.178	5.535	5.331	5.79	5.242	5.2	5.374	5.163	5.573	5.456	4.92	5.611	5.412	5.769	6.258	6.95	5.9	5.032	6.09	5.349	5.638	5.368	4.957	4.957	5.848	5.377	5.075	4.795	4.949
IGSF3	IGSF3	3321	1	117117019	117210377	1p13	NM_001007237.2	NP_001007238.1	8.93	6.178	7.298	6.481	9.169	6.728	7.764	5.415	8.793	8.26	8.748	8.076	7.464	7.646	7.285	7.64	8.026	6.497	5.9	5.751	7.361	6.042	5.81	6.02	6.218	10.065	9.007	9.585	9.317	7.715	9.503	9.272	8.364	8.365	7.832	8.377	6.579	6.058	7.111	7.41	7.779
GAPDHP64	GAPDHP64	391069	1	117256257	117257532	1p13.1			10.51	10.047	10.242	10.194	9.702	10.768	10.958		10.626	10.584	10.729	10.619	10.809	10.723	10.511	10.541	10.922	10.572	10.67	10.532	9.909	10.436	10.488	10.979	11.189	10.842	10.668	10.807	10.661	10.934	10.362	10.874	10.759	10.538	10.611	10.539	10.714	10.072	10.502	10.694	10.83
NEFHP1	NEFHP1	339396	1	117282605	117285230	1p13.1			5.711	5.899	5.59	5.73	6.137	6.111	6.469		5.631	5.656	5.964	6.415	6.027	5.91	5.545	5.832	6.433	5.394	6.097	6.4	6.174	5.853	6.144	6.247	5.89	5.962	5.802	5.988	5.726	6.235	5.465	5.789	5.558	5.858	5.888	5.86	5.962	5.73	6.06	6.578	5.689
CD2	CD2	914	1	117297085	117311851	1p13.1	NM_001767.3	NP_001758.2																			5.31			8.591
PTGFRN	PTGFRN	5738	1	117452544	117532980	1p13.1	NM_020440.2	NP_065173.2	7.354	4.697	9.443	5.89	8.49	8.025	7.845	7.358	8.515	9.544	8.501	7.618	7.704	7.818	8.032	7.031	7.331	6.933	4.702	6.381	7.073	5.001	4.687	4.96	4.658	8.54	8.889	5.043	8.816	6.903	8.041	9.363	7.988	7.797	6.647	8.34	5.874	4.657	7	6.043	7.5
CD101	CD101	9398	1	117544371	117579173	1p13	NM_001256106.2	NP_001243038.1	4.441		5.497	4.605	5.18		5.021		5.276	5.46	5.339	4.489	4.513	5.001	5	4.556	4.633	4.582	4.48	5.407	4.484					4.647	5.367		4.762		4.723	5.673	4.899	4.68		5.607			4.726		4.627
TTF2	TTF2	8458	1	117602948	117645491	1p22	NM_003594.3	NP_003585.3	8.73	7.947	7.779	8.231	7.174	8.544	7.802	5.53	8.874	7.828	7.92	7.282	7.983	8.095	8.455	8.008	7.754	7.82	8.592	8.365	7.895	8.167	7.837	7.534	7.534	7.2	8.705	8.883	8.317	8.622	8.378	7.952	8.294	8.009	7.285	7.703	6.957	7.196	7.408	6.786	7.126
TRIM45	TRIM45	80263	1	117653676	117664411	1p13.1	NM_001145635.1	NP_001139107.1	7.357	5.582	5.525	5.681	6.509	6.377	5.746	5.341	6.731	6.322	6.66	5.061	5.71	5.494	5.864	5.36	5.186	5.148	4.459	4.816	5.401	5.18	4.625	5.447	5.696	6.07	5.836	6.31	5.931	7.118	6.008	5.454	5.69	5.759	5.216	6.321	4.991	5.247	5.263	6.213	5.747
RPS15AP9	RPS15AP9	441898	1	117680786	117681269	1p13.1			7.193	7.099	6.891	6.677	7.247	6.828	6.869		7.384	6.776	7.08	7.608	7.297	7.16	7.246	7.414	7.511	7.179	7.164	7.765	6.919	7.13	8.156	7.429	7.274	7.219	7.13	6.942	7.353	7.336	7.282	7.2	7.071	6.715	7.143	6.932	7.197	6.593	6.596	7.011	6.926
VTCN1	VTCN1	79679	1	117686208	117753582	1p13.1	NM_001253849.1	NP_001240778.1					7.549							5.157																								5.072					7.433
MAN1A2	MAN1A2	10905	1	117910084	118068320	1p13	NM_006699.3	NP_006690.1	8.597	8.122	8.426	7.795	7.923	8.783	8.43	5.252	9.124	8.472	8.106	7.875	7.797	8.361	8.434	7.89	8.058	7.441	7.617	7.503	7.723	7.599	7.728	7.69	8.149	8.327	7.992	9.195	8.615	7.689	8.204	8.424	7.617	7.374	6.932	7.988	7.257	7.553	7.922	8.415	8.18
VPS25P1	VPS25P1	441899	1	118092036	118092536	1p12																			4.59
FAM46C	FAM46C	54855	1	118148603	118171011	1p12	NM_017709.3	NP_060179.2	5.3	6.324	4.753	4.894	5.117		5.401		4.934	6.046	5.329	5.247		4.57			5.02		6.754	7.388	6.038	5.155	8.937	7.788			4.617	6.059	5.275	4.684	5.252	5.853	4.507	4.957			4.438	4.609	4.456	4.5	4.776
GDAP2	GDAP2	54834	1	118406106	118472302	1p12	NM_001135589.1	NP_060156.1	6.736	7.163	6.876	6.521	6.465	7.311	7.142		7.742	7.158	6.833	6.145	7.111	6.879	6.827	6.798	6.476	6.583	6.517	6.539	6.387	6.355	5.979	6.967	7.201	7.105	7.669	8.952	7.942	6.494	7.618	6.87	7.455	7.185	6.09	6.96	6.184	6.06	7.052	7.039	6.565
WDR3	WDR3	10885	1	118472371	118503049	1p12	NM_006784.2	NP_006775.1	7.52	7.842	7.131	7.65	6.662	7.804	7.435	6.506	7.911	6.998	7.541	6.842	7.198	8.009	7.598	7.339	7.105	7.209	7.46	8.014	8.001	7.522	7.867	8.417	8.459	7.583	8.192	9.668	8.787	7.384	8.084	8.571	8.413	8.145	6.964	7.291	6.938	6.525	7.518	8.093	6.757
SPAG17	SPAG17	200162	1	118496287	118727848	1p12	NM_206996.2	NP_996879.1									6.135	4.823	5.791
PSMC1P12	PSMC1P12	644094	1	119156760	119158290	1p12			5.452	5.017	7.185	6.382	5.976	7.052	5.064		5.813	7.419	5.774	5.25	5.664	5.854	5.651	6.271	4.98	5.961	5.913	5.71	5.727	5.313	5.928	5.686	5.208	5.649	5.316	5.124	5.704	5.658	6.065	5.082	5.763	5.937	5.617	5.571	5.591	6.144	6.396	6.26	6.246
TBX15	TBX15	6913	1	119425665	119532179	1p11.1	NM_152380.2	NP_689593.2			4.89	5.096		5.246	5.58	4.705		6.552	4.666
WARS2	WARS2	10352	1	119573838	119683295	1p12	NM_015836.3	NP_056651.1	6.389	6.465	6.192	6.39	5.645	6.244	5.467	5.057	8.531	6.17	6.432	6.645	6.54	5.624	6.725	6.572	6.064	6.863	5.708	6.403	6.478	5.842	5.633	6.336	6.761	6.187	6.878	7.429	7.248	6.511	6.887	6.291	6.217	5.766	5.289	5.583	5.166	5.226	5.809	6.493	5.895
RPS3AP12	RPS3AP12	100270905	1	119669117	119669933	1p13.3-p13.1			9.008	8.581	8.016	8.093	8.778	8.554	8.59		8.899	7.998	8.377	9.171	9.077	9.179	9.011	8.802	9.309	8.852	8.851	9.304	8.64	9.174	8.823	9.102	8.982	8.84	8.695	9.279	8.326	9.118	8.347	8.271	8.979	8.337	8.261	7.959	8.816	8.178	8.201	8.758	8.298
GAPDHP58	GAPDHP58	391077	1	120038411	120039538	1p12			9.356	8.975	9.016	9.103	8.494	9.758	9.856		9.768	9.414	9.71	9.543	9.765	9.525	9.413	9.417	10.049	9.482	9.641	9.531	8.934	9.378	9.497	9.846	10.207	9.75	9.647	9.836	9.659	9.835	9.405	10.036	9.751	9.566	9.625	9.61	9.714	9.014	9.671	9.938	10.131
HSD3B1	HSD3B1	3283	1	120049825	120057681	1p13.1	NM_000862.2	NP_000853.1																																							4.828
GAPDHP32	GAPDHP32	644213	1	120076170	120077443	1p12			7.338	7.266	7.566	7.573	6.5	7.876	7.883		7.772	7.699	7.742	7.773	7.799	7.98	7.468	7.53	8.234	7.794	7.627	7.803	7.029	7.581	7.725	8.146	8.195	7.769	7.665	8.027	8.096	7.916	7.692	8.077	7.737	7.702	7.753	7.532	7.729	7.391	7.744	7.894	7.945
GAPDHP27	GAPDHP27	401960	1	120101174	120102467	1p12																												4.675	4.535	4.804	5.186									5.394
HSD3BP4	HSD3BP4	128102	1	120106502	120115199	1p13.1			6.656	6.656	7.05	7.07	6.478	6.462	6.724		6.831	6.618	7.023	6.942	6.467	6.785	6.63	6.626	6.42	6.637	7.038	6.904	6.98	6.761	6.839	6.329	6.644	6.188	6.729	6.555	6.951	6.564	6.4	6.804	6.077	6.775	6.911	6.757	6.717	7.189	7.037	6.703	7.031
GAPDHP33	GAPDHP33	644237	1	120138587	120139872	1p12																												5.615	6.29	6.665	6.483	4.736	5.491	4.759	5.8	4.638				5.519
LINC00622	LINC00622	644242	1	120140324	120141914	1p12					5.077				6.184		5.944			5.075						5.963							4.781	7.513	9.209	8.934	9.512	7.443	8.385	7.301	8.198	7.595				6.343
ZNF697	ZNF697	90874	1	120161999	120190390	1p12	NM_001080470.1	NP_001073939.1	5.287	6.683	5.829	5.375	5.106	5.705	6.801	5.289	7.65	5.862	6.634	5.944	5.108	5.567	5.044	5.13	5.59	7.017	4.774	5.301	6.223	4.837	4.845	5.54	7.077	8.024	8.139	8.742	8.986	7.635	8.225	8.159	7.659	7.527	5.075	5.489	6.266	6.224	5.809	6.068	5.611
PHGDH	PHGDH	26227	1	120254418	120286849	1p12	NM_006623.3	NP_006614.2	7.803	5.463	8.714	8.15	7.492	8.607	7.489	8.364	9.833	8.154	8.629	7.784	6.958	8.339	8.415	6.965	9.152	8.949	8.688	8.08	7.183	8.698	6.094	6.385	5.233	7.692	8.527	8.073	9.018	7.6	8.891	8.027	8.517	8.119	7.486	4.925	7.228	7.069	8.327	5.716	7.521
HMGCS2	HMGCS2	3158	1	120290618	120311555	1p13-p12	NM_001166107.1	NP_001159579.1	4.504	4.426			5.523		4.487		4.541		4.435	10.379	4.499			4.857	7.981		4.504	4.52	4.61		4.514					4.436			4.46			4.592	4.469			4.464		4.573	4.423
REG4	REG4	83998	1	120336640	120354203	1p13.1-p12	NM_032044.3	NP_114433.1													4.431				9.351
NOTCH2	NOTCH2	4853	1	120454175	120612317	1p13-p11	NM_001200001.1	NP_001186930.1	9.002	9.863	10.089	9.258	9.25	10.082	9.381	8.759	11.055	10.038	8.971	8.04	8.193	8.804	9.237	8.332	8.781	5.091	7.52	8.502	4.742	8.429	9.819	9.236	9.882	10.026	9.844	10.582	10.65	9.174	9.328	9.503	8.934	8.802	8.226	8.758	9.177	9.499	9.985	9.347	8.643
SRGAP2-AS1	SRGAP2-AS1	100873165	1	121102016	121139765	1q32.1			5.571	5.233	5.436	5.387	5.633	5.136	5.22		5.223	4.932	5.417	5.141	4.828	4.67		4.523	5.455	5.269	5.187	5.261	5.478	4.631	4.978	4.68	5.02	4.737	5.624	5.404	6.711	6.099	5.201	5.12	6.376	5.604	5.174	5.38	5.244	4.952	5.706	5.334	5.478
SRGAP2B	SRGAP2B	647135	1	121107151	121134685	1q21.1			7.471	6.975	6.58	6.842	7.002	7.553	6.262		7.607	7.556	6.094	5.697	6.08	7.455	7.187	7.046	6.875	7.167	6.381	6.447	5.942	6.205	7.357	7.523	7.03	8.368	8.309	8.699	9.096	7.893	8.571	7.978	7.597	7.343	6.144	6.103	7.223	5.637	8.217	7.274	6.497
LOC727820	LOC727820	727820	1	142529481	142537642	1q21.1			5.095	6.439	6.287	4.849	7.795	6.216	6.944	7.047	6.13	6.751	6.364	7.441	6.554	7.651	7.259	9.031	6.586	8.801	6.112	7.662	5.5	6.371	7.407	7.436	7.019	5.786	7.292	6.907	6.897	7.093	6.152	7.533	7.312	7.052	4.523	8.167	7.162	6.352	6.54	8.218	7.384
ANKRD20A12P	ANKRD20A12P	100874392	1	142697420	142713605																												5.262	5.492						4.76
LOC100132057	LOC100132057	100132057	1	143687126	147904682	1q21.2
LINC01138	LINC01138	388685	1	143717587	143744519	1q21.1			4.954	6.83	6.326	5.015	7.455	6.13	7.893	5.676	6.596	7.431	6.723	7.44	7.014	7.503	7.376	8.477	6.581	7.984	6.618	7.982	5.795	6.393	7.051	7.487	8.009	6.662	7.709	7.25	7.59	7.564	6.791	8.459	8.472	8.203	5.82	7.506	7.473	6.989	6.293	7.458	6.925
LOC100132495	LOC100132495	100132495	1	143963223	143963630	1q21.1			7.076	6.603	6.788	5.408	6.922	7.097	5.744		7.007	6.899	5.665	4.463	5.631	6.791	6.586	6.192	4.95	5.357	5.85	5.555	5.13	5.697	7.223	6.36	6.117	7.209	7.231	7.596	7.258	6.745	6.813	6.53	6.37	6.786	5.761	5.912	6.71	6.536	6.889	6.562	6.029
LINC00623	LINC00623	728855	1	144298163	149619134	1q21.1			4.615	5.109	5.15		5.733	4.884	6.405	7.906	6.094	4.591	5.59	6.827	4.923	6.359	5.379	6.903	5.856	7.415	5.281	6.487	5.647	5.284	6.494	5.708	6.647	4.593	6.357	7.168	6.204	5.39	5.196	7.101	6.333	6.127	4.717	6.387	6.406	5.901	5.396	6.721	5.431
LINC00869	LINC00869	57234	1	144300467	149651107	1q21.1			6.364	6.272	6.193	6.161	5.677	5.967	5.983		5.886	5.688	5.548	6.254	5.927	6.342	5.813	6.985	6.013	5.563	5.448	5.532	5.041	5.38	5.684	6.348	6.783	6.344	5.03	6.157	6.16	6.757	6.368	6.426	6.012	5.696	5.399	5.834	6.127	5.695	5.68	6.127	6.29
PFN1P2	PFN1P2	767846	1	144610814	144612719	1q21			6.919	6.157	5.31	6.179	5.895	6.66	5.318		6.419	6.478	5.298		5.663	5.762	5.346	5.913	4.607	5.686	5.2			4.628	5.57	6.295	6.169	6.8	6.503	6.745	5.814	6.387	6.443	5.348	6.816	6.028	5.523	5.638	6.248	5.738	5.917	5.98	4.982
NBPF8	NBPF8	728841	1	144614958	148346929	1q21.1			7.668	7.555	6.988	6.876	6.952	7.919	6.563		7.32	7.249	6.087	5.613	6.498	6.786	6.347	6.716	5.726	6.529	6.137	5.312	5.374	5.824	6.543	7.161	7.057	7.269	7.19	7.353	7.102	7.055	7.232	6.786	7.034	6.987	6.119	7.009	7.277	7.024	7.253	7.15	5.936
NBPF9	NBPF9	400818	1	144614958	148346929	1q21.1	NM_001037675.3	NP_001032764.2	9.366	8.852	8.308	8.463	9.184	9.326	8.194		8.909	9.014	8.264	6.903	8.141	9.018	8.816	8.414	7.563	8.332	8.199	7.79	7.369	8.246	8.777	8.812	7.905	8.805	9.072	8.799	8.779	8.671	9.127	8.538	8.731	8.461	8.298	8.546	8.852	9.098	8.971	8.948	7.965
PDE4DIP	PDE4DIP	9659	1	144851423	145076186	1q12	NM_001002811.1	NP_001185761.1				5.116		4.851			5.833	6.386	4.502										7.06			8.368		5.121											4.565
SEC22B	SEC22B	9554	1	145096406	145116997	1q21.1	NM_004892.5	NP_004883.3	5.551	5.195	5.333	5.143	4.815	6.254	5.416	5.446	8.461	6.063	5.846	4.917	4.881	5.159	5.192	4.95	4.623	5.083	5.18	4.867	4.745	5.297	5.447	5.138	5.446	5.687	5.693	6.846	5.96	5.037	5.671	4.835	4.78	4.781		5.307	5.966	5.241	5.939	5.13	4.616
NOTCH2NL	NOTCH2NL	388677	1	145209112	145286270	1q21.2	NM_203458.3	NP_982283.2	8.788	9.082	8.69	8.065	9.189	9.192	7.809	10.729	8.664	9.141	8.088	6.616	7.365	8.131	8.574	7.947	7.117	6.677	7.86	7.972	6.645	7.989	9.099	8.918	8.708	9.128	8.564	8.925	8.599	8.222	8.656	8.456	8.062	7.961	7.611	8.538	8.752	8.854	9.638	8.476	8.237
NBPF10	NBPF10	100132406	1	145293370	146466121	1q21.1	NM_001039703.5	NP_001034792.4	10.502	10.046	9.72	9.599	10.096	10.358	9.16		9.816	10.524	9.299	7.637	9.226	9.545	9.561	9.322	8.589	9.75	8.942	8.214	8.169	8.971	9.494	10.087	9.606	10.074	10.462	10.531	9.963	10.201	10.321	9.663	10.012	9.984	9.162	9.979	10.132	10.162	10.249	10.067	9.097
TXNIP	TXNIP	10628	1	145438437	145442644	1q21.1	NM_006472.4	NP_006463.3	9.757	9.541	6.738	5.768	7.615	8.699	7.911		8.195	9.634	8.364	8.486	7.694		8.768	7.394	9.503	9.391	6.935	8.701	9.48	8.329	10.16	8.022	7.818	8.296	8.669	6.881	8.074	7.658	7.993	7.269	7.768	7.256	4.771	5.824	6.196	9.521	9.429	5.096	7.119
POLR3GL	POLR3GL	84265	1	145456235	145470387	1q21.1	NM_032305.1	NP_115681.1	7.768	7.055	6.41	6.009	7.036	7.163	7.522	8.014	6.625	7.257	6.714	7.419	7.003	7.002	6.589	6.066	6.908	7.179	6.893	6.992	7.089	6.945	8.284	7.618	7.518	7.888	7.102	7.036	7.017	7.141	7.121	6.749	7.196	6.831	6.25	6.861	6.833	7.36	6.559	6.465	6.666
ANKRD34A	ANKRD34A	284615	1	145470507	145475647	1q21.1	NM_001039888.2	NP_001034977.1	7.016	4.76	4.959	4.771	6.383	5.471	5.287		4.843	5.336	5.2	4.729	4.778	4.925	5.171	4.844	4.871	4.674	4.815	4.74	5.04	4.572	7.007	4.977	6.31	5.668	5.483	4.956	5.107	4.643	5.145	5.073	5.84	7.583	4.679	5.432	4.876	5.335	4.807	4.721	4.774
LIX1L	LIX1L	128077	1	145477066	145501669	1q21.1	NM_153713.1	NP_714924.1	4.902	8.353	7.717	8.588	6.013	8.429	8.364	7.748	8.299	8.88	8.312	4.928	4.872	7.299	5.566	6.15	5.207	7.944	8.461	7.949	7.399	8.246	8.576	8.644	8.77	8.758	8.499	7.736	7.637	8.472	8.154	7.908	8.738	8.609	7.584	8.394	7.94	8.804	7.804	8.16	5.131
RBM8A	RBM8A	9939	1	145507556	145513535	1q21.1	NM_005105.3	NP_005096.1	9.171	7.542	6.375	7.973	8.849	7.688	7.832	7.017	8.259	7.699	8.489	9.232	7.257	8.317	7.598	7.803	8.271	8.916	8.114	7.905	7.556	8.432	8.104	8.678	7.753	8.623	7.504	7.441	6.53	7.397	7.35	6.523	7.798	7.697	7.88	8.747	7.559	7.645	8.087	9.062	8.072
GNRHR2	GNRHR2	114814	1	145509751	145516076	1q12			6.496	4.927	4.895	4.676	6.56	5.214	5.765		5.144	5.234	5.131	5.416	5.521	4.806	5.397	5.232	5.067	4.73	5.293	4.88	5.542	5.104	6.411	5.451	5.123	5.879	4.708	5.423	5.173	5.539	5.466	5.296	5.82	5.813	4.935	5.5	5.07	5.461	5.152	4.777	5.523
PEX11B	PEX11B	8799	1	145516164	145523732	1q21.1	NM_001184795.1	NP_003837.1	8.78	6.976	6.601	6.92	8.87	7.557	8.053	6.678	7.271	7.657	7.459	8.298	7.502	7.666	8.027	7.629	7.343	6.929	7.718	8.016	7.384	7.728	8.185	8.581	7.914	8.442	6.977	6.799	7.274	7.917	7.61	7.285	7.551	7.735	7.098	8.145	7.173	7.752	7.655	7.446	7.511
ITGA10	ITGA10	8515	1	145524890	145543868	1q21	NM_003637.3	NP_003628.2	4.81	4.988	5.689	6.829	5.864	4.785	4.904		4.855	7.402	4.971	4.838	4.738	4.847	4.874	4.806	4.932	4.783	4.991	4.853	4.955	5.012	4.826	4.755	4.835	7.926	5.529	5.137	5.248	5.264	5.372	7.302	5.293	5.48	4.859	5.046	4.967	5.552	4.88	5.068	4.79
ANKRD35	ANKRD35	148741	1	145549208	145568526	1q21.1	NM_144698.3	NP_653299.3		4.508			4.515				4.958	4.571	4.458	4.458				4.488	4.933		4.637	4.731	4.462	4.728										4.49				4.732	4.735	4.513	4.542		4.786
PIAS3	PIAS3	10401	1	145575987	145586546	1q21	NM_006099.3	NP_006090.2	9.206	7.466	7.577	7.579	8.763	7.529	7.482	5.29	7.309	8.349	7.178	7.249	6.314	7.635	7.778	8.172	7.466	6.545	6.48	6.051	6.504	6.331	6.75	8.188	7.732	7.412	7.182	7.557	7.118	8.019	7.233	7.691	7.746	7.592	7.018	8.041	7.529	7.854	7.134	8.98	7.808
NUDT17	NUDT17	200035	1	145586492	145589435	1q21.1	NM_001012758.2	NP_001012776.1	6.386	5.848	5.524	5.423	7.063	5.693	5.557		5.61	5.402	5.584	5.719	5.425	5.543	5.887	5.432	5.753	5.65	5.906	5.759	6.025	5.596	5.776	5.875	5.948	6.552	5.529	5.753	5.554	6.55	6.017	6.542	5.471	6.096	5.815	7.232	6.229	5.953	5.957	5.817	5.999
POLR3C	POLR3C	10623	1	145590666	145611044	1q21.1	NM_006468.6	NP_006459.3	9.265	8.499	7.814	8.716	8.474	8.984	8.552	6.524	8.338	8.384	8.256	8.511	8.696	8.296	8.304	8.119	8.132	7.811	8.255	9.09	8.62	8.284	8.954	8.845	8.651	8.796	8.364	8.83	8.246	8.869	9.08	8.609	8.887	8.717	8.039	8.991	9.011	8.196	8.171	8.96	8.383
RNF115	RNF115	27246	1	145610989	145689005	1q21.1	NM_014455.3	NP_055270.1	8.876	7.803	7.565	7.954	8.158	8.613	8.204	7.779	8.455	7.832	7.966	8.023	7.64	7.61	7.766	7.564	7.432	7.37	7.689	7.839	7.302	7.554	7.88	7.968	7.504	8.298	7.627	7.654	7.544	8.459	8.418	7.582	7.805	7.591	7.641	8.222	7.993	7.694	7.463	8.156	8.086
CD160	CD160	11126	1	145695797	145715639	1q21.1	NM_007053.3	NP_008984.1	4.512				4.468	4.724	4.573			4.599	4.421					4.666	4.51	4.469	4.516	4.607			4.959							4.501
PDZK1	PDZK1	5174	1	145727665	145764206	1q21	NM_002614.4	NP_002605.2					7.408							7.049				4.791																			4.664
GPR89A	GPR89A	653519	1	145764594	145827103	1q21.1	NM_001097613.2	NP_001091082.2	6.503	5.271	4.647	5.452	5.758	5.942	4.754		5.114	5.501	4.725	4.67	5.509	6.173	6.261	5.67	4.753	6.23	5.965	5.774	5.478	5.987	6.337	6.312	4.505	5.662	5.702	5.047	5.022	5.441	5.761	4.667	5.417	5.329	5.085	4.991	5.299	5.827		5.425	5.146
LOC100996517	LOC100996517	100996517	1	146299859	146319333				8.459	8.621	8.75	7.898	7.676	8.977	7.669		10.709	8.532	7.776	7.161	8.183	7.783	8.272	7.957	7.335	7.893	7.921	7.936	7.616	8.226	7.524	8.497	8.132	8.086	8.526	9.894	9.072	8.459	8.64	8.052	7.826	8.158	6.875	7.515	8.727	7.223	8.595	7.884	7.715
NBPF12	NBPF12	149013	1	146373856	146467639	1q21			7.938	7.402	6.092	7.242	7.756	9.123	6.684		8.379	7.337	8.491	6.941	8.139	9.042	8.361	7.385	7.085	7.353	7.745	6.746	7.303	8.824	7.432	8.032	7.346	7.252	8.013	7.074	7.757	8.164	7.856	7.456	7.816	8.005	8.004	8.399	7.352	7.64	8.472	7.58	7.126
LOC728989	LOC728989	728989	1	146490894	146514599	1q21.1			5.762	6.558	6.087	5.244	6.32	6.887	6.146		7.697	7.737	5.979	5.348	5.374	5.406	5.603	5.24	5.518	5.39	5.43	5.29	6.598	5.505	4.831	7.223	6.282	6.997	5.953	6.215	7.975	5.655	8.768	5.476	5.344	5.656	5.295	5.25	7.039	6.104	7.003	5.412	5.129
RNVU1-8	RNVU1-8	101447996	1	146556162	146556303	1q21.1			5.489	5.348	5.137	6.231	5.959	6.133	5.777		5.257	5.554	5.427	5.258	6.255	4.58	5.603	5.462	5.21	5.474	4.539	4.809	6.339	6.357	6.18	8.487	5.74	6.421	4.631	5.482	5.138	6.42	4.889	6.372	4.709	4.608	5.208	6.11	4.911	5.652		5.953	5.051
PRKAB2	PRKAB2	5565	1	146626684	146644168	1q21.1	NM_005399.4	NP_005390.1	7.559	6.016	7.03	6.783	7.083	7.218	6.511	5.307	7.962	7.501	7.525	6.622	6.368	6.736	6.871	6.147	6.727	6.889	6.232	6.333	5.958	6.351	6.375	7.057	7.321	7.758	6.85	7.411	6.443	7.285	7.206	7.251	6.861	6.639	6.277	7.017	6.846	6.546	6.847	7.097	7.343
PDIA3P1	PDIA3P1	171423	1	146649429	146651528	1q21.1			6.273	5.428	5.038	4.793	7.068	6.013	6.298		5.678	6.392	5.309	6.048	6.064	5.367	6.151		4.897	4.864		4.894		4.666		6.243	6.487	6.103	5.36	6.19	5.123	5.63	4.519	5.676	6.101	5.819	4.675	4.994	6.372	5.728	5.154	6.261	5.781
FMO5	FMO5	2330	1	146655883	146697230	1q21.1	NM_001461.3	NP_001138301.1					5.486							7.37					4.487
CCT8P1	CCT8P1	644131	1	146674704	146676564	1q21.1			6.143	6.322	6.491	6.674	6.583	6.639	6.75		6.407	6.292	6.544	7.281	7.094	6.881	6.548	6.585	6.516	6.234	6.815	7.016	7.445	6.311	6.955	7.043	7.446	6.493	6.698	7.027	6.496	6.416	6.391	6.903	6.639	6.744	6.296	6.257	7.255	6.24	6.438	6.581	6.175
CHD1L	CHD1L	9557	1	146714290	146767447	1q12	NM_004284.4	NP_001243267.1	8.254	7.583	6.85	7.601	7.695	8.315	7.443	6.985	7.739	7.752	7.611	8.127	7.516	8.096	8.232	7.577	7.996	7.972	8.327	8.999	8.034	8.579	7.928	8.83	8.208	8.925	8.023	8.181	8.202	8.683	8.325	8.155	8.135	7.952	7.858	8.04	7.929	7.696	7.783	8.708	8.334
LINC00624	LINC00624	100289211	1	146853913	146989699	1q21.1
BCL9	BCL9	607	1	147013270	147098020	1q21	NM_004326.3	NP_004317.2	7.977	6.996	6.06	7.01	7.716	7.656	7.779		8.05	7.73	7.742	7.872	7.522	8.076	7.86	7.847	7.439	7.508	8.17	5.234	6.058	7.671	7.526	7.45	7.815	8.441	8.347	7.847	7.645	7.82	7.544	8.239	8.352	8.239	6.934	7.82	7.264	7.329	6.454	8.331	7.493
ACP6	ACP6	51205	1	147119167	147142634	1q21	NM_016361.4	NP_057445.4	6.741	6.306	4.486		6.541	6.229	6.176	4.621	7.112	7.738	7.442	7.58	7.061	6.714	6.642	7.677	7.426	7.437	5.785	5.453		6.221	7.452	7.213	6.347	7.136	6.475	6.507	6.28	6.057	6.847	6.909	6.998	6.523	5.98	6.362	6.922	6.502	4.846	6.222	7.775
GJA5	GJA5	2702	1	147228331	147245466	1q21.1	NM_181703.3	NP_859054.1																												4.941
GJA8	GJA8	2703	1	147374945	147381395	1q21.1	NM_005267.4	NP_005258.2	5.783	5.912	5.217	5.663	5.463	5.329	6.073		5.542	5.265	5.938	6.099	5.362	5.665	5.2	5.602	5.672	5.805	5.544	5.839	5.587	5.578	5.674	5.409	5.406	5.287	5.361	5.341	5.556	5.412	5.588	5.948	5.158	5.733	5.62	5.457	5.87	5.742	5.439	5.361	5.357
PDZK1P2	PDZK1P2	100034743	1	147466232	147481825	1q21.2			5.61	5.502	5.52	5.311	5.44	5.076	5.58		5.657	5.126	5.665	5.28	5.527	4.869	5.536	5.698	5.252	5.534	5.547	5.603	5.748	5.59	5.135	5.144	5.548	5.287	5.067	5.16	5.598	4.911	5.373	5.689	5.472	5.431	5.764	5.044	5.942	5.683	5.366	5.402	5.615
PFN1P4	PFN1P4	767851	1	147601715	147602420	1q21.1			5.182																	4.55						4.692			4.512				4.725		4.548
LOC284561	LOC284561	284561	1	147751385	147763966	1q21.3									4.554																	4.844													6.005
NBPF15	NBPF15	284565	1	148558187	148596267	1q21.2	NM_173638.4	NP_001164226.1	9.242	9.015	8.459	8.633	8.668	9.224	8.208		8.81	8.901	8.131	7.763	8.12	8.289	7.947	8.225	7.802	8.801	7.88	7.169	7.389	7.602	7.973	8.797	8.822	8.894	9.134	9.034	8.681	9.116	8.904	8.341	9.018	8.805	8.301	8.865	9.098	8.565	8.744	8.823	7.742
FLJ37786	FLJ37786	642691	1	148864455	148866309	1q21			6.181	7.174	6.325	6.784	6.374	6.845	6.34		6.609	6.471	6.509	6.386	6.94	6.491	6.52	6.9	6.852	6.069	5.629	6.1	6.012	5.93	5.794	5.373	7.087	5.629	5.727	6.235	5.41	6.27	5.824	5.898	5.402	5.918	6.465	6.914	6.43	6.458	7.742	6.103	7.147
NBPF17P	NBPF17P	401967	1	149025631	149090117	1q21.2			9.185	8.987	8.822	8.707	8.756	8.994	8.303		8.917	9.173	8.628	7.896	7.922	8.582	8.605	8.408	7.822	7.937	8.376	8.182	7.862	8.356	9.068	8.901	8.762	8.791	8.677	8.877	8.66	8.686	8.598	8.917	8.342	8.285	8.348	8.974	8.888	9.061	9.385	9.036	8.533
LOC388692	LOC388692	388692	1	149287129	149291743	1q21.2							4.781							4.814		5.097	4.693	5.745		5.323					4.52									4.613	4.7	6.737		5.266				5.078
HIST2H2BF	HIST2H2BF	440689	1	149754244	149783928	1q21.2	NM_001161334.1	NP_001154806.1	5.683	7.075			5.98	6.875	7.624		7.147	7.006	7.152	4.86	4.538	4.489	4.584	5.004	4.497	5.008	6.042	4.611	5.816	5.126	5.284	5.828	6.19	7.963	8.386	7.897	7.598		4.654	7.756	4.909	4.736	4.661	7.324	6.434		5.297	6.298	4.999
HIST2H2BC	HIST2H2BC	337873	1	149821758	149822340	1q21.2			9.257	5.847	5.672	6.633	7.623	6.114	7.25		5.914	6.953	5.83	6.785	7.938	7.009	7.514	7.238	6.411	6.82	8.487	6.462	7.418	7.834	7.445	7.007	6.413	7.07	6.525	6.273	5.45	6.497	6.994	6.378	7.339	7.206	6.33	7.211	6.527	5.909	6.576	7.481	7.047
HIST2H2BE	HIST2H2BE	8349	1	149856009	149858232	1q21.2	NM_003528.2	NP_003519.1	5.672				6.773		4.7			4.834					4.669	4.719		4.428			7.584		4.772	4.951		5.188		5.124		4.824	5.091	4.882				4.948			6.009	5.97	5.486
HIST2H2AC	HIST2H2AC	8338	1	149858524	149858961	1q21.2	NM_003517.2	NP_003508.1	12.091	11.568	10.819	11.43	11.18	11.489	11.784		11.81	11.862	11.254	12.017	11.302	11.688	12.087	12.045	11.999	11.922	11.951	11.478	11.913	11.693	12.046	11.679	11.541	11.152	11.341	11.001	10.585	11.272	11.491	11.06	11.487	11.119	11.688	11.546	11.647	11.435	11.136	12.15	11.706
HIST2H2AB	HIST2H2AB	317772	1	149859018	149859466	1q21	NM_175065.2	NP_778235.1	11.364	10.469	9.398	10.111	10.144	10.241	10.643		10.661	10.943	10.442	11.223	10.535	11.081	10.976	10.984	11.392	10.841	11.517	10.706	10.624	11.496	11.05	11.063	10.767	10.057	10.686	9.972	9.962	10.061	10.46	10.159	11.024	10.669	11.062	10.647	10.671	10.337	9.426	10.954	10.454
BOLA1	BOLA1	51027	1	149871154	149872348	1q21	NM_016074.3	NP_057158.1	8.283	5.218	5.105	6.051	7.133	6.212	5.373		5.235	6.182	5.169	6.809	6.062	6.385	5.863	5.992	6.692	5.863	6.718	5.98	5.046	6.837	5.645	6.234	6.037	6.585	6.514	6.111	6.228	6.452	5.713	6.662	6.712	6.847	6.707	6.98	6.129	6.002	5.305	6.854	6.587
SV2A	SV2A	9900	1	149874871	149889434	1q21.2	NM_014849.4	NP_055664.3		4.465	6.756	4.61	4.456	6.941	8.232	7.977	7.893	5.252	7.491	4.488	4.503			4.553		5.634	7.03	4.623		7.156	4.646	6.939	4.582	7.314	6.291	6.01		6.965	5.569	4.603	6.557	5.615	4.469	4.655	7.286	7.087	4.554	6.655	4.456
SF3B4	SF3B4	10262	1	149895208	149900144	1q21.2	NM_005850.4	NP_005841.1	9.865	8.869	8.363	9.334	9.792	9.296	9.344	8.612	8.923	8.933	9.369	8.914	8.871	9.324	9.05	9.026	8.694	8.705	9.087	9.011	8.929	9.299	9.217	10.073	9.737	9.132	8.688	9.489	8.76	9.363	9.173	9.37	9.655	9.455	9.301	9.313	9.351	8.811	9.063	9.481	9.378
MTMR11	MTMR11	10903	1	149900542	149908791	1q12-q21	NM_181873.3	NP_870988.2	6.8	6.062	5.78	6.56	6.577	5.847	5.918		6.323	6.01	5.967	8.505	7.474	6.417	5.887	7.298	6.739	5.581	4.77	4.933	4.847	4.74	4.73	5.58	6.154	6.139	5.913	5.202	5.12	5.272	5.38	5.277	5.635	5.723	6.419	6.837	5.82	6.463	5.482	7.013	6.105
OTUD7B	OTUD7B	56957	1	149912228	149982686	1q21.2	NM_020205.3	NP_064590.2	7.123	6.381	5.842	6.747	6.714	6.84	6.961	4.804	6.472	7.589	7.165	6.5	6.661	6.701	6.29	6.68	6.516	6.332	6.121	5.53	6.221	4.565	6.045	7.074	6.907	8.601	7.693	7.909	7.676	7.448	8.263	7.147	7.879	7.951	6.036	6.917	6.477	6.554	6.834	6.909	7.023
VPS45	VPS45	11311	1	150039349	150117505	1q21.2	NM_007259.3	NP_009190.2	9.042	7.942	7.438	8.135	9.144	8.357	8.264	7.391	8.282	8.415	8.231	8.411	7.742	8.078	8.188	7.569	7.829	7.578	8.314	7.145	7.826	7.88	7.735	8.669	8.021	8.583	8.018	8.073	8.026	7.989	8.115	8.277	8.57	8.378	7.629	8.309	7.89	7.77	8.085	8.517	8.068
PLEKHO1	PLEKHO1	51177	1	150121623	150132260	1q21.2	NM_016274.4	NP_057358.2	6.034	5.985	6.641	6.722	4.967	6.601	6.024	6.84	5.744	6.131	6.296	4.648		5.321	5.208		5.034	5.697	7.944	5.57	5.467	7.864	6.16	5.094	5.767	6.642	5.977	5.143	5.966	5.842	6.121	5.787	6.503	6.234	5.128	5.234	6.496	5.867	5.815	5.325	4.597
ANP32E	ANP32E	81611	1	150190716	150208504	1q21.2	NM_001136478.2	NP_112182.1	8.511	8.194	7.735	8.136	7.563	8.576	7.884	7.931	8.516	7.73	8.498	8.005	8.104	8.257	8.16	7.798	8.1	7.792	8.71	8.534	8.14	8.628	8.686	9.229	7.989	7.659	7.565	7.109	7.465	7.638	7.706	7.51	7.677	7.484	7.691	7.976	7.857	7.092	6.962	8.723	8.199
CA14	CA14	23632	1	150230137	150237480	1q21	NM_012113.1	NP_036245.1																								4.536		5.933	4.668	6.604		7.14	8.605		7.741	7.646
APH1A	APH1A	51107	1	150237798	150241609	1p36.13-q31.3	NM_001243771.1	NP_001230700.1	10.239	9.271	8.001	9.248	9.539	9.293	9.045	8.013	9.098	8.996	9.068	9.634	9.388	8.776	9.163	9.248	9.225	8.519	8.632	9.071	8.537	8.72	9.399	9.45	9.259	9.686	8.686	8.926	8.727	9.829	9.111	8.738	9.741	9.704	8.724	8.975	8.673	9.263	8.904	9.369	9.089
C1orf54	C1orf54	79630	1	150244686	150253335	1q21.2	NM_024579.3	NP_078855.2										4.434			4.785											5.133		5.296					5.378		4.686	4.768
CIART	CIART	148523	1	150254942	150259504	1q21.2	NM_144697.2	NP_653298.1	6.927		5.629	6.399	5.976	6.613	5.441		7.069	6.347	4.774		4.683													4.609	5.494		5.44				6.246	5.971				4.863	5.35	5.767
MRPS21	MRPS21	54460	1	150266261	150281414	1q21	NM_018997.2	NP_061870.1	9.914	7.766	8.27	9.498	9.112	9.422	8.372	10.599	9.056	9.328	9.181	9.38	8.261	9.545	8.239	9.023	8.365	8.2	8.891	9.221	9.545	8.613	9.771	9.884	9.233	9.649	9.315	9.553	9.11	9.275	9.06	9.261	10.151	9.646	8.881	9.461	7.79	8.891	8.578	9.591	8.361
PRPF3	PRPF3	9129	1	150293927	150325704	1q21.1	NM_004698.2	NP_004689.1	8.975	8.069	7.224	8.88	8.372	8.353	7.768	7.369	8.166	8.313	8.219	8.127	7.573	8.076	8.054	7.88	7.177	7.843	8.042	7.981	7.866	8.509	8.04	8.917	8.335	8.155	7.806	8.22	7.682	7.905	7.938	7.935	8.193	8.186	7.907	8.146	8.337	7.233	7.705	8.534	7.765
RPRD2	RPRD2	23248	1	150336586	150449041	1q21.3	NM_015203.3	NP_056018.2	8.966	7.378	6.916	7.72	7.765	7.689	7.711	5.632	7.651	7.872	7.533	8.002	8.074	8.074	8.022	8.062	7.729	7.779	8.132	7.893	7.358	7.824	8.625	8.336	7.846	8.438	7.601	7.365	7.422	7.888	7.78	7.495	7.667	7.504	7.278	7.989	7.202	7.303	7.491	8.404	7.859
ECM1	ECM1	1893	1	150480486	150486265	1q21	NM_004425.3	NP_004416.2	5.482	7.88	7.767	5.291	5.326	6.958	7.009	8.36	6.268	6.892	6.671	8.053	5.687	5.694	5.266	5.591	6.552	5.443	5.448	5.468	7.125	5.341	5.404	6.653	8.182	9.296	9.079	7.456	8.222	9.197	9.449	8.851	9.419	9.25	5.383	5.475	6.006	6.614	6.166	5.469	5.294
ADAMTSL4	ADAMTSL4	54507	1	150521844	150533412	1q21.3	NM_019032.4	NP_061905.2	5.666	6.433	5.962	5.736	5.954	5.454	5.607		5.662	5.575	5.707	5.587	5.599	5.503	5.422	5.531	5.777	5.613	5.638	5.775	8.071	5.588	5.588	6.665	5.65	5.44	5.522	5.645	5.507	6.25	5.439	5.669	5.485	5.718	5.746	6.03	5.877	5.709	6.228	6.188	5.718
LOC100289061	LOC100289061	100289061	1	150527092	150532711	1q21.3			5.158	6.235	5.504	6.119	6.093	5.539	5.034		5.777	5.381	5.86	4.712	5.426	5.479	5.266	5.174	5.235	5.285	5.721	5.272	6.197	5.317	5.32	5.299	5.011	5.782	5.814	5.576	5.117	5.769	5.615	5.78	5.661	5.762	5.475	5.691	5.684	5.621	5.599	6.172	6.146
C1orf138	C1orf138	574406	1	150532553	150534590	1q21.2			5.039	5.509		5.283	5.099	5.472	4.712		4.984	4.627	4.502			4.814	4.634	5.562	4.823	4.617			4.489		4.593	6.464	4.734	4.552	5.251	5.098				4.54	4.677	4.958		5.008	5.401	5.235	5.061	6.295	4.946
MCL1	MCL1	4170	1	150547026	150552214	1q21	NM_001197320.1	NP_001184249.1	9.394	9.316	8.792	9.51	9.051	9.202	9.037	9.314	9.001	9.162	8.998	8.887	8.626	8.815	9.114	9.334	9.814	8.803	8.228	8.353	9.437	8.289	9.228	10.657	10.023	9.132	9.38	8.707	8.514	8.445	8.531	8.762	9.001	8.863	8.368	9.403	9.518	9.225	9.424	10.442	9.15
ENSA	ENSA	2029	1	150594598	150602098	1q21.3	NM_207045.1	NP_996926.1	10.014	8.194	7.493	8.671	9.955	8.34	8.14	8.569	8.556	8.211	8.802	8.419	8.04	8.285	8.787	8.656	8.94	8.338	8.585	8.02	8.799	8.982	8.854	9.01	8.152	8.3	8.188	7.898	7.665	8.384	8.07	7.967	8.404	8.156	8.039	8.736	8.269	8.697	7.881	8.853	9.308
GOLPH3L	GOLPH3L	55204	1	150618700	150669672	1q21.3	NM_018178.5	NP_060648.2	8.02	6.421	5.164	6.984	6.959	6.714	6.926	5.7	6.584	6.844	6.967	8.185	7.388	7.189	7.325	7.298	7.984	6.856	6.899	7.343	7.031	6.623	7.735	6.863	6.968	7.458	6.456	6.2	6.627	5.865	6.591	6.248	6.584	6.433	6.672	6.852	7.125	7.153	7.5	7.068	7.393
HORMAD1	HORMAD1	84072	1	150670534	150693364	1q21.3	NM_032132.4	NP_001186758.1																														6.115					5.524	7.642					5.245
CTSS	CTSS	1520	1	150702671	150738433	1q21	NM_004079.4	NP_001186668.1		5.21					7.951					7.194	4.777			4.991				7.313	5.287		8.38	5.962							4.696				4.898		4.544	6.466		4.498
CTSK	CTSK	1513	1	150768683	150780917	1q21	NM_000396.3	NP_000387.1	4.956			4.909	4.669	4.649	4.96			4.557					4.645											7.707	7.846		8.764		9.365	6.661				5.088				4.843
ARNT	ARNT	405	1	150782180	150849244	1q21	NM_001197325.1	NP_848514.1	9.244	7.879	7.545	8.125	8.493	8.264	8.123	6.555	7.751	8.513	7.654	7.905	7.661	8.143	8.293	7.558	8.467	7.527	7.498	8.143	8.052	7.404	7.97	8.927	8.1	8.585	7.729	7.802	7.602	8.129	7.906	7.759	7.972	7.778	7.622	9.02	8.047	7.816	7.606	9.083	8.122
SETDB1	SETDB1	9869	1	150898814	150937220	1q21	NM_001243491.1	NP_001230420.1	9.045	7.04	6.41	7.251	8.18	7.493	7.159	5.118	7.001	7.513	7.088	7.633	7.589	8.066	8.144	7.821	7.422	7.718	7.78	8.088	7.483	7.707	7.735	8.04	7.227	8.064	7.468	7.407	7.125	7.589	7.52	7.221	7.56	7.359	7.132	7.622	7.236	7.181	6.902	8.198	7.759
CERS2	CERS2	29956	1	150937648	150947479	1q21.3	NM_181746.3	NP_071358.1	10.333	10.383	9.243	10.065	10.76	10.13	10.06	9.19	9.949	9.674	9.795	9.943	9.831	9.996	9.65	10.026	9.538	9.316	9.479	9.859	9.915	9.23	9.89	10.554	10.046	10.162	9.701	9.853	9.53	9.879	9.888	10.011	10.113	9.96	9.772	10.719	10.058	9.85	9.468	10.28	9.828
ANXA9	ANXA9	8416	1	150954498	150968114	1q21	NM_003568.2	NP_003559.2	7.85	5.009	4.926	5.043	9.217	4.868	4.936		5.005	4.929	5.223	7.003	7.101	5.506	7.01	8.133	5.262	5.759	5.147	5.074	5.272	5.012	5.348	4.86	4.873	6.317	4.917	5.02	4.914	5.065	5.269	5.368	4.971	5.24	5.613	5.041	5.01	5.131	5.54	5.429	8.03
FAM63A	FAM63A	55793	1	150969300	150980854	1q21.3	NM_001040217.2	NP_060849.2	6.601	5.52	5.02	5.2	7.47	5.647	5.833		5.632	5.483	5.959	7.341	6.224	4.738	5.895	6.215	5.364	6.294	5.297	5.303	5.774	4.648	7.722	5.119	6.177	6.379	5.882	5.424	5.676	6.428	6.361	5.57	6.267	5.999	5.324	6.314	5.548	5.59	4.54	5.441	6.395
PRUNE	PRUNE	58497	1	150980866	151008189	1q21	NM_021222.1	NP_067045.1	7.858	5.377	5.148	6	6.974	5.787	5.801	5.209	5.325	5.935	5.896	7.437	6.421	6.142	6.277	6.109	6.368	6.247	6.449	5.829	6.768	6.248	6.064	6.942	5.927	6.741	5.651	5.76	5.632	5.93	5.985	6.166	6.293	6.336	5.839	6.302	6.225	5.522	5.502	7.211	6.368
BNIPL	BNIPL	149428	1	151009028	151020076	1q21.3	NM_001159642.1	NP_001153114.1	5.225	4.67	4.658	4.669	8.77	4.59	4.514		4.722	4.593	4.755	4.578	4.573	4.689	4.709	4.535	4.748	4.712	4.85	4.655	4.851	4.774	4.618	4.482	4.513		4.562	4.585	4.509	4.539	4.444	4.662	4.515	4.812	4.664	4.776	4.712	4.803	4.737	4.728	5.035
C1orf56	C1orf56	54964	1	151020258	151023871	1q21.3	NM_017860.3	NP_060330.2	7.348	5.763	5.343	5.599	6.878	6.169	5.824		5.831	5.837	6.026	6.383	6.546	4.548	6.155	5.865	5.661	5.705	5.338	4.574	4.876	4.84	5.424	5.123	5.648	7.387	5.185	6.33	6.011	7.584	6.902	4.505	6.495	6.305	6.285	7.077	6.155	6.141	5.82	7.862	6.487
CDC42SE1	CDC42SE1	56882	1	151023446	151032125	1q21.3	NM_001038707.1	NP_064624.1	8.85	7.228	6.744	7.788	8.805	7.546	7.949	6.699	7.342	7.875	7.983	7.891	7.817	7.255	7.534	7.507	7.182	7.265	7.145	7.374	8.14	7.118	7.61	8.864	8.081	8.663	8.072	7.625	7.311	7.896	7.656	7.773	8.005	7.85	6.925	8.188	7.308	7.187	7.427	8.432	8.166
MLLT11	MLLT11	10962	1	151032150	151040973	1q21	NM_006818.3	NP_006809.1	5.305	5.623	8.876	7.851	7.91	9.314	10.958	10.237	11.137	8.736	11.786	6.941	9.435	4.705	6.149	6.07	4.574	9.018	10.523	4.685	9.836	10.198	5.217	7.767	4.837	8.415	10.371	5.373	7.668	6.654	8.442	6.026	7.172	7.745	9.181	9.306	9.285	4.819	6.015	8.498	5.598
GABPB2	GABPB2	126626	1	151043079	151091007	1q21.3	NM_144618.2	NP_653219.1	6.861	6.388	5.087	5.695	6.527	6.17	5.871	4.449	5.99	6.288	5.355	6.774	6.533	6.21	6.772	5.902	5.428	6.276	6.635	6.695	5.548	6.993	5.729	6.463	6.297	5.619	5.387	5.143	5.001	5.317	4.765	5.261	5.043	5.367	5.443	6.015	5.524	4.964	5.38	6.26	6.235
SEMA6C	SEMA6C	10500	1	151104162	151119140	1q21.2	NM_001178061.1	NP_112175.2	6.252	6.502	6.023	6.231	6.55	6.61	6.279		6.177	6.962	6.468	5.74	5.818	7.232	6.76	5.844	5.981	6.212	6.332	6.087	6.435	6.478	6.061	6.175	6.572	6.045	6.47	6.373	6.289	6.784	5.975	6.588	6.367	6.512	6.321	6.46	6.189	6.764	6.472	6.895	5.882
TNFAIP8L2	TNFAIP8L2	79626	1	151129104	151132225	1q21.3	NM_024575.4	NP_078851.2																			4.553	7.277			4.716	6.678										4.664
LYSMD1	LYSMD1	388695	1	151132223	151138424	1q21.3	NM_001136543.1	NP_997716.1	7.825	6.329	6.173	6.556	7.18	6.882	6.952		6.157	7.079	6.975	6.965	7.027	6.853	7.113	6.082	6.889	6.574	6.988	6.149	6.601	6.741	5.829	7.245	6.913	7.618	6.948	6.897	6.675	7.054	7.303	7.13	7.381	7.288	6.436	7.11	6.611	6.687	6.745	7.031	6.044
VPS72	VPS72	6944	1	151148775	151162689	1q21	NM_005997.2	NP_005988.1	9.944	8.499	7.862	9.122	9.35	9.105	8.927	7.478	8.643	8.649	8.773	9.126	8.758	8.906	8.891	8.685	8.543	8.916	8.792	9.039	8.936	8.837	9.28	9.267	9.268	8.938	8.321	8.93	8.196	9.396	8.713	8.719	8.856	8.666	8.385	8.991	8.823	8.568	8.44	9.084	8.876
PIP5K1A	PIP5K1A	8394	1	151171020	151222007	1q21.3	NM_003557.2	NP_003548.1	8.142	7.368	6.839	7.569	7.716	8.184	7.145	6.607	7.606	7.507	7.771	6.489	7.141	7.557	7.705	7.235	7.33	6.773	7.388	6.809	6.246	7.304	7.107	8.119	7.773	7.772	7.047	7.233	6.864	7.632	6.971	7.564	7.353	7.61	6.904	7.748	7.939	7.259	7.84	8.182	7.826
PSMD4	PSMD4	5710	1	151227196	151239954	1q21.3	NM_002810.2	NP_002801.1	11.105	9.949	9.516	10.225	10.491	10.109	10.368	10.199	10.137	10.116	10.657	10.342	10.09	10.369	10.066	9.954	9.945	10.151	10.007	9.996	10.514	9.871	10.679	10.524	10.178	10.167	10.217	10.489	10.123	10.561	10.346	10.547	10.323	10.055	10.114	10.557	10.773	10.476	10.28	11.273	10.805
LOC100507670	LOC100507670	100507670	1	151252499	151254764				5.467	5.176	4.728	4.975	5.519	4.734	4.865		4.635	4.817	5.441	5.171	4.958	4.665	4.976	4.761	5.343	4.694	4.962	4.534	5.199	5.391	4.898	5.408	5.043	4.914	4.861	5.122	4.563	5.17	5.076	5.212	5.737	5.527	5.108	4.785	5.053	4.728	4.529	5.178	5.132
ZNF687	ZNF687	57592	1	151254030	151264381	1q21.3	NM_020832.1	NP_065883.1	9.147	7.595	6.682	7.525	8.641	7.746	7.785		7.851	7.853	7.856	8.345	8.316	8.191	8.277	8.214	8.232	7.89	7.594	7.746	7.563	7.739	7.922	8.284	7.936	8.293	7.863	7.945	7.521	8.529	7.937	7.921	8.247	7.924	7.649	8.068	7.93	7.396	7.413	8.242	8.147
PI4KB	PI4KB	5298	1	151264272	151300191	1q21	NM_002651.2	NP_001185703.1	9.157	7.957	7.245	8.297	8.605	8.118	8.397	7.264	8.293	8.517	8.395	8.029	7.951	7.702	8.015	7.856	7.631	7.468	7.566	7.504	8.168	7.71	8.266	8.631	8.599	8.554	7.955	7.996	7.694	8.827	8.193	8.228	8.381	8.322	7.314	8.288	8.12	8.049	8.317	8.481	7.915
RFX5	RFX5	5993	1	151313115	151319769	1q21	NM_001025603.1	NP_000440.1	8.493	7.524	6.708	7.557	7.819	7.063	7.041	6.937	7.02	6.942	7.02	7.787	7.578	7.732	7.692	7.41	7.432	7.254	8.188	8.024	6.723	8.298	8.487	8.104	7.823	7.782	8.329	7.993	7.506	7.971	7.477	7.3	8.409	8.155	7.013	7.843	7.125	7.241	7.534	8.32	6.111
SELENBP1	SELENBP1	8991	1	151336777	151345210	1q21.3	NM_003944.3	NP_003935.2	9.919	6.313	5.372	5.311	8.663	4.982	5.33		5.321	7.377	7.306	8.034	7.528	4.838	7.797	6.79	6.26	5.843	5.297	5.289	7.945	5.244	5.14	5.009	4.985	8.725	4.994	5.103	5.131	5.197	5.759	6.124	5.063	5.304	6.549	7.379	6.833	6.201	5.299	5.315	5.166
PSMB4	PSMB4	5692	1	151372040	151374412	1q21	NM_002796.2	NP_002787.2	11.021	10.068	9.532	10.442	10.741	10.352	10.4	11.29	10.368	10.301	10.66	10.109	10.257	10.501	10.609	10.227	9.587	9.924	10.234	10.097	10.222	10.345	10.573	11.141	10.096	11.3	11.268	11.556	11.023	10.668	11.017	11.006	11.164	11.06	9.944	10.532	10.412	10.207	10.256	10.881	10.287
POGZ	POGZ	23126	1	151375199	151431941	1q21.3	NM_145796.3	NP_665739.3	9.618	8.327	7.424	8.287	8.588	8.585	7.915	7.153	8.397	8.491	8.084	7.819	7.998	8.706	8.799	8.499	8.187	8.217	8.849	8.483	7.925	8.905	8.37	9.03	8.231	9.069	8.441	8.377	7.921	8.642	8.578	8.027	8.42	8.122	8.124	8.71	8.397	8.275	7.936	9.044	8.54
CGN	CGN	57530	1	151483861	151511167	1q21	NM_020770.2	NP_065821.1	6.679	5.088	5.057	5.208	7.202	5.098	5.083		5.209	5.122	5.441	7.021	6.963	5.658	6.353	6.848	5.929	5.608	5.215	5.067	5.112	5.42	5.109	5.452	5.048	5.492	4.955	5.309	5.169	5.513	4.98	5.062	4.825	5.345	5.278	5.592	5.208	5.063	5.186	6.292	7.271
TUFT1	TUFT1	7286	1	151512780	151556059	1q21	NM_020127.2	NP_001119809.1	7.384	7.143	6.883	9.026	7.936	8.323	6.287	8.993	7.281	6.456	7.922	7.661	6.416	6.401	6.316	7.242	6.742	6.907	4.69	5.174	4.994	5.196	6.438	8.14	4.935	6.341	5.865	6.274	5.953	6.533	6.418	5.487	6.669	6.573	6.386	8.081	6.564	6.392	7.956	6.335	7.611
SNX27	SNX27	81609	1	151584661	151671559	1q21.3	NM_030918.5	NP_112180.4	9.493	8.054	7.742	8.349	8.902	8.532	8.607	6.846	8.287	8.502	8.294	8.762	8.812	8.807	8.902	8.543	8.566	7.985	8.264	8.502	7.531	8.153	8.304	9.143	8.65	9.235	8.364	8.76	8.786	9.193	9.02	8.802	8.879	8.793	8.448	8.964	8.254	8.744	8.185	9.356	8.546
CELF3	CELF3	11189	1	151672533	151689296	1q21	NM_001172648.1	NP_009116.3	6.302	6.31	6.33	6.162	6.19	5.528	6.192		6.46	6.122	6.681	5.98	6.1	6.092	6.017	6.554	6.241	6.331	6.482	6.541	6.505	6.409	6.674	5.72	5.928	5.681	6.1	5.839	6.341	6.376	6.172	6.284	6.251	6.629	6.49	6.082	6.569	6.265	6.484	6.235	6.232
MRPL9	MRPL9	65005	1	151732118	151736392	1q21	NM_031420.2	NP_113608.1	10.231	9.225	8.308	9.321	9.912	9.44	9.208	9.573	9.363	9.095	9.366	9.962	9.504	9.176	9.455	9.243	9.471	9.747	9.561	9.805	9.358	9.446	9.733	10.109	9.831	9.373	9.154	9.058	8.989	9.567	9.343	9.29	9.615	9.328	8.972	9.384	9.521	9.151	8.998	9.427	9.596
OAZ3	OAZ3	51686	1	151735444	151743806	1q21.3	NM_016178.2	NP_057262.2					5.296
TDRKH	TDRKH	11022	1	151744040	151763010	1q21	NM_001083965.1	NP_001077432.1	8.142	6.352	4.47	6.681	7.637	6.89	5.814		5.888	5.995	5.752	7.428	6.279	6.196	6.722	6.737	6.241	5.97	6.975	5.606	5.901	6.969	6.775	6.327	6.237	7.814	6.231	5.778	6.193	5.904	5.601	4.819	6.737	6.424	6.243	6.432	6.526	5.898	5.017	7.862	6.174
LINGO4	LINGO4	339398	1	151772739	151777918	1q21.3	NM_001004432.2	NP_001004432.1	6.739	6.481	6.928	6.479	7.037	6.512	6.662		6.731	6.778	6.79	6.401	6.368	6.339	5.951	6.517	6.843	6.573	6.659	6.698	6.552	6.682	6.896	7.129	6.325	6.517	6.429	6.412	6.82	6.67	6.499	6.72	6.402	6.009	6.35	6.666	6.702	6.181	6.3	6.329	6.604
RORC	RORC	6097	1	151778546	151804348	1q21	NM_001001523.1	NP_005051.2	5.198	4.845	4.77	4.82	6.08	4.796	4.93		4.967	4.761	5.003	5.279	4.933	4.777	4.796	4.965	4.974	4.959	6.155	4.861	4.906	5.393	5.076	8.382	4.734	5.082	4.727	4.845	4.792	4.844	4.76	4.879	4.664	5.062	4.873	4.829	4.82	5.111	4.851	5.115	4.854
C2CD4D	C2CD4D	100191040	1	151810338	151813033	1q21.3	NM_001136003.1	NP_001129475.1	5.962	5.36	5.64	5.485	5.786	4.876	5.35		5.839	5.44	5.609	6.914	5.666	4.782	5.423	5.671	6.094	5.62	5.439	5.63	5.924	5.311	5.604	6.885	5.439	6.852	6.107	6.04	6.237	6.569	6.577	6.033	6.713	6.876	5.337	5.467	5.63	5.879	5.619	5.472	5.568
THEM5	THEM5	284486	1	151819576	151826173	1q21.3	NM_182578.3	NP_872384.1	4.726	4.694	4.576		4.84	4.596	4.926		4.737			4.945				4.516	4.867	4.675	4.908	4.836	4.425	4.645	4.701	5.262	4.561	4.619	4.602		4.567		4.432		4.465				4.589
THEM4	THEM4	117145	1	151843342	151882361	1q21	NM_053055.4	NP_444283.2	6.267	5.495	5.123		6.136		4.962	4.427	5.071	5.545	5.335	7.279	5.192	6.352	5.64	6.215	5.504	6.43		6.203	6.628		5.504	7.064	6.415	8.229	7.92	7.184	7.569	7.699	6.528	7.397	7.999	7.704	5.806	5.992	5.876	5.423	4.605	6.722	5.45
KRT8P28	KRT8P28	391099	1	151921870	151923465	1q21.3			7.054	5.872	5.47	5.392	7.378	5.727	5.603		5.545	5.415	5.562	7.007	6.946	6.03	6.638	6.913	7.197	6.855	6.005	6.233	5.8	5.536	5.691	5.457	5.42	5.298	5.544	5.217	5.574	5.734	5.443	5.614	5.381	5.361	7.062	6.389	6.437	5.635	7.004	5.372	7.159
S100A10	S100A10	6281	1	151955385	151966714	1q21	NM_002966.2	NP_002957.1	9.857	10.606	9.589	10.656	10.715	10.661	10.353	8.614	10.674	10.82	10.485	11.083	10.608	9.552	10.752	10.955	10.371	10.428	7.535	6.292	4.751	7.648	6.582	11.369	8.749	10.45	10.646	10.007	10.32	9.927	9.27	9.572	10.185	10.515	11.012	10.931	10.562	10.208	10.933	11.11	11.156
S100A11	S100A11	6282	1	152004981	152009511	1q21	NM_005620.1	NP_005611.1	10.673	10.979	10.618	11.255	11.429	10.859	10.743	9.849	10.609	10.76	10.297	11.949	10.628	9.571	9.735	11.239	11.24	10.262	7.49	8.873	9.323	6.565	11.197	11.325	10.884	10.797	11.011	10.106	10.518	10.649	10.277	10.407	10.895	10.319	10.697	11.41	10.547	11.228	10.649	11.567	11.305
TCHHL1	TCHHL1	126637	1	152056619	152061540	1q21.3	NM_001008536.1	NP_001008536.1	4.477	4.584	4.661	4.739			4.575		4.775	4.818	4.44	4.425		4.589					4.67	4.983	5.167	4.506	4.8	4.832	5.213					4.549		4.745			4.658	4.784	5.195	4.466	4.683	4.881	4.71
TCHH	TCHH	7062	1	152078792	152087930	1q21.3	NM_007113.3	NP_009044.2	4.714	4.617	5.015	4.733			4.446		4.44		4.578		4.47					4.464	4.815	4.67	4.653	4.8	4.619					4.707		4.596		4.907		4.778	4.677		4.676	4.491	4.581	4.614	4.48
HDHD1P2	HDHD1P2	327659	1	152095635	152097645	1q21.3			5.18	5.364	4.751	5.224	4.813	5.445	4.637		5.124	4.591	4.64	5.246	4.906	4.702	4.84	5.024	4.802	5.427	5.18	5.625	4.516	5.171	4.928	4.557	5.456		4.604	5.686	5.021	5.059	4.913	5.141	4.792	4.77	5.131	4.513	5.986	4.764	5.015	4.583	4.965
HRNR	HRNR	388697	1	152184551	152196672	1q21.3	NM_001009931.2	NP_001009931.1	5.801	6.489	5.807	5.792	5.585	5.403	5.804		6.089	5.707	5.904	5.74	5.804	5.553	5.664	5.836	5.872	5.941	5.968	5.765	5.68	5.758	5.639	5.868	7.424	7.404	5.733	6.942	6.417	6.084	6.977	6.935	5.716	5.675	5.81	6.121	5.766	6.112	7.584	7.009	5.824
FLG	FLG	2312	1	152274650	152297679	1q21.3	NM_002016.1	NP_002007.1	5.49	9.173	5.496	5.595	5.376	5.495	5.479		6.113	5.351	7.474	5.445	5.413	5.299	5.357	5.422	5.525	5.456	5.564	5.553	5.539	5.545	5.514	5.325	7.656	6.444	5.365	7.344	5.567	6.018	6.672	6.446	5.196	5.5	5.432	5.852	5.521	7.953	6.005	6.578	5.709
FLG-AS1	FLG-AS1	339400	1	152285934	152339168	1q21.3				5.118							5.234		5.207														8.263	6.713		7.287		5.073	7.257	5.569				5.246			5.636	7.577
FLG2	FLG2	388698	1	152321212	152332482	1q21.3	NM_001014342.2	NP_001014364.1	4.92	5.111	5.176	5.219	4.969	4.659	4.728		5.248	4.681	5.262	4.922	4.755	4.515	4.985	4.735	5.087	4.969	5.507	4.822	5.325	5.189	4.858	4.781	5.197	4.87	4.919	5.307	5.021	4.83	5.12	5.317	4.659	5.09	5.148	5.111	5.235	5.273	5.275	5.127	5.17
LCE3E	LCE3E	353145	1	152538174	152539229	1q21.3	NM_178435.3	NP_848522.1	5.033	4.963	5.461	4.613	5.035	4.762	5.652		5.575	5.296	5.306	5.25	5.077	4.971	5.3	5.095	5.369	5.259	5.499	5.752	5.113	5.161	4.824	5.086	4.505	5.006	4.88	5.264	5.026	4.834	5.129	5.417	4.9	5.045	5.135	5.388	5.396	5.277	5.091	4.933	5.322
LCE2A	LCE2A	353139	1	152670839	152671918	1q21.3	NM_178428.3	NP_848515.1	7.115	6.914	7.017	6.837	7.123	8.375	7.056		7.129	6.676	7.058	6.759	6.643	6.697	6.974	6.911	7.018	7.137	7.098	6.97	7.086	7.016	7.213	6.709	6.965	7.383	7.052	7.28	8.235	7.797	8.545	7.449	7.958	7.972	7.03	6.806	6.975	6.766	6.893	6.84	6.961
LCE4A	LCE4A	199834	1	152681522	152681910	1q21.3	NM_178356.2	NP_848133.1	5.359	5.358	5.321	5.501	5.252	5.403	5.842		4.996	5.244	5.518	5.849	5.491	5.125	4.715	5.25	5.541	4.868	5.086	5.793	5.8	5.371	5.207	5.19	5.317	4.465	4.921	4.997	5.272	5.218	4.99	4.595	5.052	5.413	5.157	5.529	5.366	4.904	5.395	5.019	5.456
C1orf68	C1orf68	100129271	1	152691997	152692905	1q21.3	NM_001024679.2	NP_001019850.1	6.223	6.132	6.405	6.129	6.266	5.657	6.059		6.259	5.843	6.402	6.112	5.439	5.653	5.906	5.932	6.234	6.132	6.235	6.36	6.512	6.51	6.042	5.996	5.349	5.878	6.125	5.86	6.075	6.084	5.896	5.876	6.151	6.014	6.459	6.061	6.101	6.207	6.228	6.051	6.025
KPRP	KPRP	448834	1	152730505	152734529	1q21.3	NM_001025231.1	NP_001020402.1	5.086	5.172	4.885	5.154	4.94	5.313	5.299		5.3	4.73	4.98	5.346	4.689	4.545	5.221	4.789	4.848	5.309	5.346	5.022	5.133	5.143	5.161	4.851		5.083	4.952	5.047	5.132	4.906	5.061	4.916	4.875	5.164	5.063	5.039	5.037	5.101	5.021	4.869	5.229
LCE1E	LCE1E	353135	1	152758752	152760901	1q21.3	NM_178353.1	NP_848130.1	5.537	4.761	4.605	5.201	5.233	4.758	5.766		5.465	5.194	4.876	5.439	5.387	5.349	4.993	5.473	5.372	5.031	4.97	4.978	5.466	4.532	4.77		4.676	4.446	5.568	5.133	5.253	5.136	4.999	4.96	4.476	5.599	5.209	4.894	5.049	4.83	4.772	4.868	5.699
LCE1B	LCE1B	353132	1	152784446	152785585	1q21.3	NM_178349.1	NP_848126.1	7.74	7.473	7.583	7.648	7.609	7.447	7.698		7.58	7.647	7.795	7.77	7.791	7.402	7.384	7.518	7.582	7.344	7.731	7.698	7.69	7.583	7.656	7.188	7.176	6.671	7.268	6.945	7.282	7.138	7.193	7.404	6.654	7.438	7.721	7.581	7.332	7.659	7.595	7.55	7.91
SPRR1A	SPRR1A	6698	1	152956563	152958290	1q21-q22	NM_001199828.1	NP_001186757.1												8.629																													4.475
SPRR3	SPRR3	6707	1	152974222	152976332	1q21-q22	NM_001097589.1	NP_005407.1												8.195																													9.598
SPRR1B	SPRR1B	6699	1	153003678	153005376	1q21-q22	NM_003125.2	NP_003116.2												5.873																													6.785
SPRR2D	SPRR2D	6703	1	153012200	153013594	1q21-q22	NM_006945.4	NP_008876.3			4.46					4.738		4.569		4.596	4.582								4.654			4.521	4.613	4.577	7.085	4.789	7.269	4.852	5.724	4.564	4.955	4.442					4.437	4.484
SPRR2B	SPRR2B	6701	1	153042703	153044084	1q21-q22	NM_001017418.1	NP_001017418.1																											5.326		5.544		5.057
SPRR2F	SPRR2F	6705	1	153084599	153085991	1q21-q22	NM_001014450.1	NP_001014450.1	6.794	6.75	6.928	6.613	6.861	6.908	6.887		7.242	6.963	6.864	6.94	6.969	7.041	7.015	6.992	7.457	6.882	7.476	6.801	7.439	6.986	7.401	6.69	6.194	6.291	6.176	7.2	6.781	6.326	6.934	6.979	6.968	6.701	7.102	6.838	7.048	7.17	7.199	6.797	7.381
LELP1	LELP1	149018	1	153175905	153177601	1q21.3	NM_001010857.2	NP_001010857.1	8.3	8.602	8.841	8.361	8.274	8.271	8.505		8.578	8.471	8.443	8.035	8.322	7.996	8.142	8.304	8.776	8.351	8.387	8.602	8.271	8.662	8.53	8.182	7.938	8.051	8.273	7.922	8.033	8.228	7.963	8.109	8.021	7.806	8.677	8.184	8.687	8.17	8.179	7.77	7.95
PRR9	PRR9	574414	1	153190059	153191793	1q21.3	NM_001195571.1	NP_001182500.1												8.636
PGLYRP3	PGLYRP3	114771	1	153270337	153283194	1q21	NM_052891.1	NP_443123.1	6.149	6.013	6.151	5.547	6.003	5.636	6.345		6.089	5.733	6.1	5.969	5.927	5.683	5.723	5.981	5.984	6.071	6.365	6.188	6.133	6.132	6.125	5.613	5.686	5.663	5.575	5.812	5.821	6.132	5.82	6.184	5.337	5.696	6.274	5.902	6.198	6.21	5.969	5.662	6.021
PGLYRP4	PGLYRP4	57115	1	153302596	153321317	1q21	NM_020393.2	NP_065126.2	5.126	5.739	5.242	5.17	5.342	5.254	4.908		5.357	4.942	5.391	5.23	4.922	4.991	5.158	5.339	5.431	5.172	5.659	5.269	5.278	5.501	5.49	4.883	4.517	4.821	4.889	4.658	5.058	4.987	4.969	5.234	5.015	4.887	5.33	5.21	5.392	4.94	4.72	4.882	5.186
S100A9	S100A9	6280	1	153330329	153333503	1q21	NM_002965.3	NP_002956.1					4.983				4.444										4.487	7.037		4.641												4.618		6.779				6.115	10.662
S100A8	S100A8	6279	1	153362507	153363664	1q21	NM_002964.4	NP_002955.2																				7.344																				4.916	5.064
S100A7A	S100A7A	338324	1	153388999	153395701	1q21.3	NM_176823.3	NP_789793.1	4.582	4.869	5.173	4.722		4.567	4.819	4.844	4.864	4.675	4.787	4.541	4.958	4.77	4.654	4.57	4.561	4.573	5.067	4.882	4.773	4.92	4.787	4.926	4.55	4.732	4.598	4.755	4.607	4.739	4.491	4.887		4.702	4.682	4.462	4.863	4.661	4.754		4.718
S100A6	S100A6	6277	1	153507075	153508717	1q21	NM_014624.3	NP_055439.1	6.823	9.692	8.365	8.454	8.754	8.737	9.026	12.343	9.466	9.189	9.188	9.932	9.091	9.221	8.258	9.981	10.402	8.781	5.799	6.778	5.396	5.683	8.202	9.088	8.118	9.34	8.469	8.547	6.785	5.911	8.144	8.889	8.84	8.343	8.839	9.558	8.264	9.222	8.775	8.49	4.765
S100A5	S100A5	6276	1	153509622	153514241	1q21	NM_002962.1	NP_002953.2		5.282										7.193		4.707		5.382
S100A4	S100A4	6275	1	153516094	153518282	1q21	NM_002961.2	NP_002952.1	5.933	9.612	7.34	6.377	7.68	5.7	5.911	10.098	6.217	6.049	6.151	10.189	8.192	9.394	5.812	10.193	6.909	9.8	8.06	8.723	6.05	5.44	9.964	9.105	5.15	9.47	5.826	6.616	5.156	5.218	5.452	6.429	5.678	6.181	9.309	8.34	6.109	10.559	5.561	7.142	6.03
S100A3	S100A3	6274	1	153519808	153521734	1q21	NM_002960.1	NP_002951.1		6.455	5.822	4.811		5.286	6.721		5.426	5.453	5.115	5.917	4.59	5.685	4.48	5.554	4.733	6.345	4.577					4.679	6.332	5.084	7.173	4.706		4.596	4.459	5.808	6.65	7.377	7.554	7.444	5.262	5.682	5.13	5.153	4.479
S100A2	S100A2	6273	1	153533584	153538306	1q21	NM_005978.3	NP_005969.1		6.252		6.354		6.567	4.891	8.85	6.938	4.993	8.604	4.768		5.354		7.445	5.837	5.354						5.069	5.035			5.321		4.57			4.61	4.452		5.375	7.367	6.121	5.312	5.47	5.272
S100A16	S100A16	140576	1	153579358	153585644	1q21	NM_080388.1	NP_525127.1	9.715	8.984	8.464	5.229	10.401	9.016	8.872	7.419	9.356	8.353	9.857	9.29	9.649	9.148	8.84	9.856	9.91	9.732	5.496	5.146	5.392	5.698	4.976	5.291	10.53	9.139	5.611	9.389	5.8	7.703	8.044	7.726	7.984	7.536	9.042	8.331	9.682	9.066	9.66	5.361	10.265
S100A14	S100A14	57402	1	153586731	153588808	1q21.3	NM_020672.2	NP_065723.1	9.074				4.536							7.266	11.454	8.852	9.457	8.62	10.362	6.453		4.432	4.487	4.44												4.613			4.461	4.437		4.604	9.019
S100A13	S100A13	6284	1	153591275	153606568	1q21	NM_001024211.1	NP_001019384.1	8.074	6.958	6.754	7.175	7.752	7.273	7.548	9.357	7.211	7.781	7.504	7.127	7.194	7.441	7.405	7.374	5.72	7.402	4.687	4.752	6.279	4.766	4.962	5.734	7.19	9.131	7.896	7.924	7.518	7.601	8.035	8.131	8.267	8.056	6.767	6.965	7.171	7.355	7.522	6.823	7.613
S100A1	S100A1	6271	1	153600872	153604513	1q21	NM_006271.1	NP_006262.1	4.955	4.68	4.662	4.7	5.644	4.538	4.81		4.688	4.961	4.816	4.662	4.698	4.618	4.685	4.803	4.811	4.646	4.744	4.74	4.982	4.745	4.823	5.048	5.009	9.196	7.905	7.607	8.23	7.229	7.946	7.858	8.018	7.92	4.622	4.669	4.713	4.844	4.705	4.93	4.846
CHTOP	CHTOP	26097	1	153606457	153618782	1q21.3	NM_015607.3	NP_001231593.1	8.337	7.992	7.135	7.938	8.722	8.44	7.617		8.444	8.064	7.908	8.116	7.792	8.712	8.665	8.404	8.104	8.626	8.215	8.01	7.644	8.6	8.148	8.927	7.591	8.075	8.089	7.84	7.767	8.534	8.178	7.629	8.295	7.936	7.716	8.19	8.012	7.598	7.798	8.642	8.441
SNAPIN	SNAPIN	23557	1	153631129	153634328	1q21.3	NM_012437.5	NP_036569.1	8.172	7.23	6.458	7.006	8.529	8.084	7.548	7.839	7.763	7.439	7.751	7.836	7.208	7.61	7.718	7.555	7.452	7.322	6.669	6.864	6.568	6.941	7.739	7.77	7.303	8.232	7.323	7.363	7.264	7.882	7.513	7.433	7.766	7.374	7.201	7.794	7.317	7.223	7.159	8.088	7.624
ILF2	ILF2	3608	1	153634263	153643504	1q21.3	NM_001267809.1	NP_001254738.1	10.705	10.316	9.675	9.774	10.659	10.465	10.376	10.089	10.602	10.08	10.631	10.61	10.37	10.898	10.868	9.987	10.457	10.577	11.084	10.669	10.749	10.982	10.626	11.098	10.577	10.753	9.655	10.146	9.89	10.603	10.402	10.385	10.06	10.066	10.321	10.483	10.745	10.069	10.262	11.113	10.738
NPR1	NPR1	4881	1	153651163	153666468	1q21-q22	NM_000906.3	NP_000897.3	4.923	5.064	5.043	5.097	4.977	4.92	4.988		5.079	5.019	5.084	4.976	5.095	4.774	5.844	4.942	5.028	4.953	5.035	5.11	5.062	5.005	5.017	4.769	4.955	9.499	4.888	4.89	4.936	5.237	4.985	5.065	4.835	4.968	5.155	5.689	5.284	4.976	5.165	6.298	5.089
INTS3	INTS3	65123	1	153700566	153746555	1q21.3	NM_023015.3	NP_075391.3	8.883	8.094	7.247	8.163	8.716	8.273	7.872	6.651	7.998	8.409	8.035	8.234	8.413	8.279	8.961	8.371	8.24	7.756	8.157	8.212	7.522	7.999	8.065	8.179	8.205	9.221	8.764	8.605	9.322	8.907	9.117	8.599	8.925	8.777	7.816	9.124	8.301	7.721	8.227	9.199	8.553
SLC27A3	SLC27A3	11000	1	153747767	153752633	1q21.3	NM_024330.1	NP_077306.1	8.232	5.967	5.704	6.148	7.035	5.664	5.898		6.889	6.06	6.077	6.904	6.968	6.388	7.452	6.531	6.41	6.391	5.711	6.123	5.8	5.669	5.733	6.191	6.215	10.951	7.837	7.718	9.194	6.364	9.571	6.419	6.494	6.717	5.75	6.042	5.95	5.878	5.831	6.331	5.775
GATAD2B	GATAD2B	57459	1	153777202	153895451	1q21.3	NM_020699.2	NP_065750.1	9.261	8.361	7.931	8.774	9.299	8.692	8.532	5.116	8.518	8.602	8.475	8.537	8.283	8.837	8.283	8.949	8.648	8.432	9.167	8.848	8.234	9.109	9.181	9.267	8.922	9.319	9.056	8.632	8.576	9.126	8.851	9.029	9.181	8.963	8.115	8.85	8.253	8.201	8.298	9.122	8.264
DENND4B	DENND4B	9909	1	153901976	153919154	1q21	NM_014856.2	NP_055671.2	8.521	7.741	7.26	7.826	8.132	7.878	7.642	6.068	7.796	7.848	7.821	7.753	8.173	8.003	8.284	8.221	8.034	7.786	8.195	8.125	8.467	8.3	7.906	9.175	8.055	8.402	8.064	8.049	7.71	8.557	8.508	8.093	8.456	8.264	7.794	8.5	8.306	7.588	7.575	8.373	7.977
CRTC2	CRTC2	200186	1	153920147	153931132	1q21.3	NM_181715.2	NP_859066.1	7.706	7.483	6.452	7.215	7.524	7.274	7.45	5.074	6.952	7.346	7.324	7.258	7.441	7.463	7.168	7.495	7.196	6.868	7.368	7.222	6.972	6.889	7.195	8.47	7.737	7.557	7.727	7.654	7.191	7.751	7.134	7.304	8.233	7.849	6.865	7.435	7.48	7.402	7.268	8.132	7.158
SLC39A1	SLC39A1	27173	1	153931574	153940660	1q21	NM_014437.4	NP_055252.2	8.633	8.417	7.695	8.317	9.25	8.395	8.25	7.528	8.348	8.617	8.374	8.676	9.213	7.916	8.739	8.541	8.521	8.393	7.414	7.414	7.85	7.344	7.569	9.214	8.773	8.5	8.922	8.353	8.249	8.928	8.679	8.395	9.134	9.224	8.144	9.493	8.661	8.282	7.689	8.882	8.795
CREB3L4	CREB3L4	148327	1	153940314	153946840	1q21.3	NM_001255981.1	NP_001242908.1	8.078	5.328	5.01	5.031	8.692	5.171	5.346		5.17	5.51	5.452	6.908	6.057	5.702	6.209	6.083	5.676	6.158	5.647	5.73	5.502	5.752	6.146	5.572	6.112	6.38	5.878	5.89	5.654	5.892	5.709	5.625	6.142	6.109	5.637	5.763	5.636	5.122	5.001	5.974	6.016
JTB	JTB	10899	1	153946744	153950451	1q21	NM_006694.3	NP_006685.1	10.191	9.506	8.753	9.404	10.076	9.328	9.541	9.903	9.648	9.454	9.788	10.146	9.736	9.459	9.668	9.475	9.673	9.705	9.616	9.845	9.934	9.613	10.836	10.166	9.163	9.808	8.773	9.039	8.982	9.833	9.304	9.367	9.323	8.912	9.533	10.45	9.725	9.549	9.329	9.508	9.919
RAB13	RAB13	5872	1	153954092	153958853	1q21.2	NM_002870.3	NP_002861.1	9.01	7.653	8.139	7.978	9.392	8.68	8.674	10.417	8.635	9.269	8.379	8.423	7.669	8.338	8.324	7.378	8.219	7.743	5.237	4.588	7.698	4.65	4.708	7.647	9.311	9.66	8.657	8.948	9.126	8.689	8.991	9.243	8.931	8.941	8.006	8.87	9.009	8.766	7.663	8.516	6.089
RPS27	RPS27	6232	1	153963238	153964631	1q21	NM_001030.4	NP_001021.1	9.811	9.146	8.523	9.33	9.504	9.491	9.277		9.27	9.222	9.153	9.934	9.387	9.598	9.66	9.359	10.002	9.126	9.205	9.865	9.212	9.438	10.28	10.427	9.853	9.955	9.321	9.469	9.082	9.959	9.229	9.533	9.903	9.529	9.228	9.846	9.441	9.295	9.198	9.765	9.195
NUP210L	NUP210L	91181	1	153965167	154127592	1q21.3	NM_001159484.1	NP_001152956.1	7.487
RPS7P2	RPS7P2	100270868	1	154051897	154052440	1q21			6.346	6.216	6.136	5.691	6.301	5.811	6.035		6.204	6.19	6.064	5.824	5.957	6.553	6.7	6.553	6.453	6.484	6.206	6.735	5.809	5.844	5.835	6.231	6.536	6.499	6.168	6.778	5.891	6.054	6.119	5.983	5.806	6.188	6.105	6.488	6.581	6.121	5.822	6.422	6.099
TPM3	TPM3	7170	1	154127779	154164611	1q21.2	NM_001043352.1	NP_705935.1	8.568	8.513	7.88	8.837	8.863	8.766	7.94		8.44	8.543	8.508	8	8.621	8.503	8.681	9.064	7.699	8.483	8.692	8.59	8.124	8.571	8.341	9.637	8.452	8.935	9.062	8.951	8.405	9.028	8.586	8.469	9.068	8.842	8.234	8.852	8.588	8.42	8.277	8.924	8.363
C1orf43	C1orf43	25912	1	154179176	154193273	1q21.2	NM_015449.2	NP_620077.1	10.621	9.822	9.395	10.136	10.909	10.109	10.276	10.796	10.329	10.023	10.261	10.942	10.575	10.317	10.003	10.226	10.535	10.191	9.883	10.298	9.929	9.78	10.83	10.267	10.31	11.021	10.251	10.384	10.261	11.128	10.845	10.341	10.563	10.292	9.892	11.159	10.409	10.335	10.185	10.608	10.587
UBAP2L	UBAP2L	9898	1	154192647	154243986	1q21.3	NM_014847.3	NP_055662.3	9.974	9.385	8.519	9.833	9.944	9.674	9.386	7.867	9.23	9.511	9.555	8.918	9.646	9.525	9.645	9.578	8.854	9.249	9.364	9.658	9.486	9.337	9.871	10.539	9.899	10.086	9.574	9.834	9.658	10.23	10.109	9.782	10.147	10.037	9.016	9.69	9.29	9.308	9.103	10.09	9.332
HAX1	HAX1	10456	1	154245038	154248355	1q21.3	NM_006118.3	NP_001018238.1	9.777	8.923	8.581	9.185	9.759	9.148	9.445	9.925	9.05	9.049	9.185	9.708	9.228	9.12	9.442	8.869	9.55	9.107	9.145	9.376	9.426	9.172	9.941	9.905	9.471	9.976	9.113	9.366	8.925	9.904	9.229	9.861	9.768	9.468	8.726	9.937	9.464	8.817	9.282	9.759	9.529
AQP10	AQP10	89872	1	154293591	154297801	1q21.3	NM_080429.2	NP_536354.2	5.422	5.473	5.215	5.6	5.363	5.228	5.634		5.427	5.335	5.298	5.892	5.095	5.241	5.187	5.447	5.657	5.321	5.431	5.293	6.704	5.277	5.658	5.089	4.955	5.158	5.123	4.908	5.393	5.344	5.193	5.413	5.28	5.352	5.536	5.287	5.48	5.359	5.36	5.444	5.575
ATP8B2	ATP8B2	57198	1	154298035	154323780	1q21.3	NM_020452.3	NP_065185.1	7.192	5.465	7.829	7.902	7.514	7.716	7.766	7.346	6.857	8.567	6.741	4.92	4.857	7.626	4.945	4.991	5.028	5.161	7.752	5.193	7.351	8.258	8.939	8.233	8.623	8.8	8.614	8.469	7.613	8.512	8.239	9.129	9.189	9.089	7.244	8.141	7.684	7.564	6.134	8.429	5.079
IL6R	IL6R	3570	1	154377668	154441926	1q21	NM_181359.2	NP_852004.1	4.923	4.778	4.769	4.891	5.369	5.045	5.549		4.993	5.21	5.604	6.066	5.057	5.736	4.777	4.924	5.266	5.41	4.741	8.052	4.888	4.873	7.056	9.521	6.287	8.734	8.115	6.055	5.435	8.932	7.93	6.444	7.824	8.03	5.439	5.892	5.123	4.881	5.586	7.557	5.625
SHE	SHE	126669	1	154451953	154474526	1q21.3	NM_001010846.2	NP_001010846.1	5.344	5.252	5.27	5.217	5.073	4.918	5.122		5.435	4.981	5.469	5.286	4.986	4.791	4.78	5.037	5.24	5.076	5.359	5.248	5.558	5.295	5.324	4.506	4.809	4.674	4.92	5.177	5.139	5.305	5.004	5.211	4.855	5.263	5.491	5.011	5.279	5.308	5.307	5.182	5.317
TDRD10	TDRD10	126668	1	154474694	154520623	1q21.3	NM_182499.3	NP_872305.3																							5.099																	4.614
UBE2Q1	UBE2Q1	55585	1	154521050	154531120	1q21.3	NM_017582.6	NP_060052.3	9.612	8.779	8.015	8.951	9.309	9.141	9.196	8.912	9.564	8.949	9.193	9.366	9.447	8.951	9.175	9.014	8.934	8.864	8.554	8.885	8.434	8.687	9.6	10.183	9.433	9.729	8.994	9.603	8.772	10.321	9.362	9.009	9.633	9.337	8.571	9.831	9.225	8.782	9.163	9.696	9.258
CHRNB2	CHRNB2	1141	1	154540256	154552353	1q21.3	NM_000748.2	NP_000739.1	5.507	5.544	5.79	5.668	5.922	5.371	5.813		5.82	5.883	5.997	5.747	5.505	5.636	5.494	5.67	5.938	6.485	5.745	5.985	5.242	5.377	5.933	5.46	5.93	5.422	7.398	5.473	6.137	5.891	6.235	6.1	5.496	5.279	5.824	5.847	5.765	5.216	6.59	5.652	5.664
ADAR	ADAR	103	1	154554533	154600456	1q21.3	NM_001111.4	NP_001102.2	9.892	9.099	8.515	10.065	9.849	9.324	9.68	10.12	9.944	9.551	9.553	9.525	9.295	9.896	9.867	10.865	9.328	9.163	9.712	9.467	8.791	9.755	10.685	10.603	9.859	10.073	9.349	9.338	9.033	10.135	9.579	9.552	9.626	9.264	9.316	9.963	9.363	9.287	9.839	10.316	10.072
KCNN3	KCNN3	3782	1	154669941	154842754	1q21.3	NM_001204087.1	NP_740752.1							4.803																6.899		4.766		4.49							5.2
PMVK	PMVK	10654	1	154897207	154909484	1q22	NM_006556.3	NP_006547.1	7.791	6.623	6.467	7.337	8.441	7.16	6.878	7.242	7.672	7.233	7.044	8.447	7.335	6.714	6.545	6.962	7.259	6.537	7.005	7.002	6.1	7.099	7.706	7.556	6.963	7.365	7.18	7.118	6.784	7.338	6.961	6.829	7.409	7.386	7.164	7.642	7.282	7.37	5.689	7.984	7.662
PBXIP1	PBXIP1	57326	1	154916558	154928567	1q21.3	NM_020524.2	NP_065385.2	5.294	4.757	4.992	5.308	6.614	4.886	5.046		5.054	5.955	4.9	5.61	5.044	5.102	5.058	5.106	4.939	5.033	5.272	4.874	4.426	5.062	6.047	4.798	5.472	6.363	5.408	5.387	5.425	5.416	5.098	4.868	5.089	4.937	4.67	5.096	4.89	5.279	5.161	5.615	4.852
PYGO2	PYGO2	90780	1	154929501	154934258	1q21.3	NM_138300.3	NP_612157.1	8.11	7.895	6.946	7.296	8.463	7.808	7.803	6.346	8.435	7.827	7.819	8.411	7.974	7.746	8.168	8.212	7.907	7.603	7.754	7.475	7.839	7.488	8.246	8.013	7.679	7.95	7.67	7.714	7.204	7.701	7.562	7.044	8.292	8.069	7.267	8.214	7.657	7.752	7.268	8.332	8.095
SHC1	SHC1	6464	1	154934773	154946959	1q21	NM_001130040.1	NP_001123512.1	7.86	8.983	8.96	10.109	8.999	9.357	9.283	9.168	9.751	9.64	9.739	9.215	9.368	9.158	8.504	9.047	8.111	8.337	7.644	7.627	8.05	7.195	8.447	8.048	9.865	9.974	8.785	8.189	8.658	8.689	8.702	9.522	9.247	9.026	9.174	10.03	9.356	8.819	9.886	10.4	8.583
CKS1B	CKS1B	1163	1	154947117	154951725	1q21.2	NM_001826.2	NP_001817.1	7.984	8.747	7.068	8.087	7.616	8.043	7.508	8.931	8.674	7.626	7.864	8.474	7.68	7.663	7.97	7.905	8.191	7.65	7.442	7.398	7.293	6.976	7.495	7.848	8.002	7.88	7.784	7.45	7.306	7.666	7.292	6.791	7.882	7.709	7.792	7.869	8.176	7.853	7.538	8.627	8.404
FLAD1	FLAD1	80308	1	154955769	154965587	1q21.3	NM_201398.2	NP_079483.3	7.451	6.889	6.597	7.849	8.197	7.225	7.675	6.124	7.916	6.976	7.782	8.708	8.525	7.688	7.875	7.936	7.438	7.649	7.049	7.613	7.838	7.05	8.604	7.689	7.523	7.567	7.115	7.2	7.039	7.965	7.3	7.363	7.433	7.342	7.51	7.717	7.671	6.986	7.344	8.019	7.661
ZBTB7B	ZBTB7B	51043	1	154975105	154991001	1q21.3	NM_001252406.2	NP_001243384.1	6.864	5.895	5.553	6.714	7.495	5.245	6.419	6.247	6.553	6.419	7.042	7.111	7.21	6.675	6.899	6.747	6.443	6.241	5.021	6.731	6.222	5.069	6.964	6.467	5.769	6.277	5.714	5.861	5.589	6.297	5.765	5.835	6.317	6.275	6.201	6.863	6.239	5.809	5.725	6.635	6.836
DCST2	DCST2	127579	1	154991002	155006257	1q22	NM_144622.2	NP_653223.2	5.749	5.018	4.675	4.63	6.027	4.879	4.757		4.843	5.162	4.84	5.255	5.065	5.251	4.978	4.842	4.811	4.786	4.689	4.897	4.871	4.651	5.327	4.759	4.804	5.038	5.092	4.567	4.659	4.937	4.789	4.958	5.127	4.509	4.934	4.941	5.159	5.046	4.978	5.324	4.863
DCST1	DCST1	149095	1	155006281	155023406	1q22	NM_001143687.2	NP_689707.2	5.883	5.941	6.087	5.733	5.981	5.567	6.22		6.036	5.804	6.085	5.838	5.951	5.551	5.79	5.648	6.069	5.903	5.956	6.115	6.039	6.057	6.05	5.57	5.864	5.105	5.186	5.58	5.584	5.713	5.267	5.84	5.391	5.786	5.896	5.607	6.095	6.031	6.123	5.651	5.735
LOC100505666	LOC100505666	100505666	1	155017667	155036467				5.867	5.789	4.883	5.654	6.681	5.16	4.969		5.171	5.283	5.36	5.344	5.5	5.053	5.594	5.282	5.05	5.295	5.125	4.948	5.224	4.578	6.367	5.183	5.192	5.442	5.39	5.492	4.834	5.48	5.441	5.102	6.416	6.584	5.406	5.838	5.146	4.913	4.742	5.24	5.479
ADAM15	ADAM15	8751	1	155023747	155035252	1q21.3	NM_207191.2	NP_997079.1	8.865	8.338	7.326	8.148	9.605	7.585	8.499		8.558	8.683	7.949	8.572	9.296	8.646	8.529	8.384	8.386	7.995	6.684	8.428	7.402	5.946	9.872	8.826	7.632	8.058	8.053	8.079	8.065	8.047	8.169	8.578	8.465	8.333	7.717	8.257	8.518	8.217	8.095	8.321	8.311
EFNA4	EFNA4	1945	1	155036212	155042029	1q21-q22	NM_182689.1	NP_005218.1	7.29	5.736	5.357	6.703	7.165	6.059	6.145	4.61	6.531	6.348	6.474	6.946	6.925	6.406	6.936	6.394	6.87	5.073	6.016	4.858	5.73	5.857	6.384	6.584	6.207	5.465	5.639	5.689	5.322	6.08	5.582	5.477	6.158	6.099	5.77	6.91	6.011	5.802	5.927	6.605	6.269
EFNA3	EFNA3	1944	1	155051347	155060014	1q21-q22	NM_004952.4	NP_004943.1	7.138	5.138	5.112	5.574	7.772	5.455	5.397		5.847	5.078	5.559	6.402	6.921	6.964	6.129	5.14	6.406	5.153	5.364	5.258	5.816	5.167	6.915	6.266	5.578	5.189	5.112	5.444	5.348	6.378	5.089	5.586	6.297	6.179	5.407	6.083	4.994	5.086	5.125	5.89	5.944
EFNA1	EFNA1	1942	1	155100348	155107386	1q21-q22	NM_004428.2	NP_872626.1	7.421	5.284	5.083	6.281	8.156	5.082	5.919	5.716	6.371	5.96	6.289	6.814	6.878	6.349	7.626	6.501	7.518	6.677	5.163	4.885	5.271	5.028	5.74	5.771	5.07	6.304	5.784	5.479	5.257	6.745	5.282	6.141	6.884	6.635	5.75	8.666	5.852	5.795	6.827	7.435	7.246
SLC50A1	SLC50A1	55974	1	155107819	155111334	1q22	NM_018845.3	NP_001116309.1	9.502	8.022	7.267	7.882	9.884	7.891	7.173	7.817	8.201	7.907	8.025	9.47	8.767	8.529	9.059	8.533	9.168	7.704	7.258	7.617	8.491	6.544	8.889	8.942	8.471	8.404	7.873	8.554	7.83	8.808	8.013	8.618	8.55	8.506	7.389	8.971	8.08	8.243	7.965	9.126	9.118
DPM3	DPM3	54344	1	155112366	155112996	1q22	NM_153741.1	NP_061846.2	7.936	8.49	7.229	8.482	8.089	8.131	7.91	7.245	8.95	8.176	8.46	7.849	7.516	8.156	8.396	7.863	8.824	7.274	8.212	7.014	7.525	7.238	9.269	8.738	7.038	8.9	7.94	7.492	7.791	7.599	8.486	7.63	8.834	8.562	7.844	9.01	7.443	7.932	6.52	7.688	7.989
KRTCAP2	KRTCAP2	200185	1	155141883	155145804	1q22	NM_173852.3	NP_776251.1	10.446	10.29	9.392	10.967	10.505	9.955	10.367	10.314	10.661	10.451	10.013	10.934	10.427	9.996	10.317	10.153	10.328	9.723	9.988	10.526	10.707	9.788	11.668	11.098	10.302	10.547	9.672	9.745	9.852	10.906	10.393	10.299	10.12	9.7	10.182	11.089	10.197	10.413	10.053	10.727	10.69
TRIM46	TRIM46	80128	1	155146262	155157447	1q22	NM_025058.4	NP_001243528.1	6.061	5.812	6.287	7.311	6.645	6.069	5.936		6.296	6.381	6.142	5.541	5.824	6.104	5.672	5.732	5.879	5.696	6.497	5.833	5.918	6.411	6.036	7.121	6.407	5.787	6.177	5.852	6.125	6.265	5.951	5.781	6.215	6.585	6.039	6.135	6.095	6.191	5.843	6.848	5.971
MUC1	MUC1	4582	1	155158299	155162706	1q21	NM_001018017.2	NP_002447.4	8.563	5.505	6.042	7.977	10.496	5.703	5.43		5.755	6.716	5.677	7.892	8.965	5.564	5.559	5.744	5.56	6.447	5.415	5.415	6.737	5.351	6.957	8.225	5.459	5.322	5.523	5.252	5.243	5.877	5.352	5.421	5.656	5.857	5.591	7.841	5.34	5.523	6.117	6.296	7.285
THBS3	THBS3	7059	1	155165378	155177772	1q21	NM_001252608.1	NP_001239537.1	6.522	5.422	6.587	7.273	7.357	5.359	5.57		5.913	7.047	5.712	5.889	5.881	5.768	5.982	5.72	5.669	6.127	5.554	5.377	5.366	5.552	5.785	5.849	6.076	7.535	6.253	6.054	5.618	6.799	5.51	6.243	5.989	5.878	5.815	6.439	5.593	6.153	6.209	6.81	6.333
MTX1	MTX1	4580	1	155178489	155183630	1q21	NM_198883.2	NP_942584.1	7.73	7.027	6.704	7.184	8.154	7.669	7.347	7.971	7.692	7.31	7.5	8.528	7.655	7.973	7.78	7.327	7.897	7.571	7.43	7.65	7.807	7.503	7.774	7.924	8.051	7.629	7.403	7.715	7.539	8.661	7.694	7.977	7.993	7.534	7.689	8.074	7.831	7.402	7.551	7.846	8.259
GBAP1	GBAP1	2630	1	155183615	155197325	1q21			8.118	7.823	5.734	6.81	7.171	6.932	6.871		6.777	7.841	5.965	6.252	7.856	6.832	7.509	6.035	5.855	6.386	7.207	5.856	6.051	6.888	7.367	7.488	6.068	7.821	6.667	7.383	6.666	7.64	8.072	6.481	7.772	7.487	6.169	7.25	7.051	6.328	5.929	7.454	6.547
MTX1P1	MTX1P1	4581	1	155200766	155204226	1q22			8.31	7.445	6.613	7.381	8.598	8.42	8.172		8.121	7.728	7.621	9.43	8.384	8.88	8.596	8.148	8.606	8.23	7.588	8.055	7.989	7.447	8.413	8.783	8.815	8.173	7.839	8.193	7.997	8.807	8.28	8.364	8.58	7.659	7.85	8.453	8.189	6.982	7.75	8.482	8.292
GBA	GBA	2629	1	155204238	155214653	1q21	NM_000157.3	NP_001165283.1	8.904	8.548	7.505	8.868	9.475	8.537	8.662		8.543	8.968	8.059	8.647	8.635	8.117	8.324	8.065	7.978	7.687	7.377	7.727	7.203	7.481	8.827	8.605	8.938	9.805	9.103	9.232	9.313	10.359	10.039	8.924	9.361	9.234	7.896	9.082	8.056	8.529	8.332	9.101	8.86
FAM189B	FAM189B	10712	1	155216995	155225274	1q21	NM_001267608.1	NP_937995.1	9.082	7.964	7.616	8.503	8.851	7.897	7.923	6.199	8.144	7.987	8	8.2	8.898	8.69	8.651	8.129	8.405	7.861	7.834	7.417	7.819	7.69	7.953	8.811	8.917	8.734	8.176	8.058	7.861	8.912	8.376	8.698	8.732	8.498	7.774	8.694	8.43	8.233	8.53	8.945	7.891
SCAMP3	SCAMP3	10067	1	155225769	155232176	1q21	NM_052837.2	NP_005689.2	9.22	8.893	8.667	9.242	9.583	8.973	9.65	8.946	9.667	8.905	9.007	9.185	9.067	8.663	8.827	8.672	8.248	8.16	8.607	8.765	8.899	8.575	9.725	9.854	9.195	9.634	8.929	9.471	8.881	9.987	9.164	9.276	10.029	9.732	8.739	9.521	8.881	8.645	8.88	9.419	9.045
CLK2	CLK2	1196	1	155232658	155243320	1q21	NM_003993.2	NP_003984.2	8.158	7.238	6.608	6.953	8.21	7.538	6.84	5.957	7.986	7.825	7.243	7.178	7.529	7.913	7.955	7.557	7.482	7.672	8.194	7.924	7.65	7.9	8.085	8.77	7.139	7.87	7.523	7.329	7.143	7.392	7.481	7.564	7.578	7.344	7.312	7.857	7.468	7.173	7.326	8.188	7.765
HCN3	HCN3	57657	1	155247217	155259639	1q22	NM_020897.2	NP_065948.1	7.613	6.483	5.986	6.622	7.127	6.14	6.357		6.704	6.47	6.415	6.626	6.994	6.985	7.562	7.123	6.933	7.095	6.774	6.267	6.899	6.341	6.574	7.216	6.464	6.45	6.487	6.646	6.056	6.672	7.023	6.066	6.662	6.636	6.705	7.478	6.572	6.126	6.115	7.486	6.592
PKLR	PKLR	5313	1	155259083	155271225	1q21	NM_181871.3	NP_870986.1																					6.356										5.086
FDPS	FDPS	2224	1	155278538	155290457	1q22	NM_001135821.1	NP_001129293.1	9.528	9.632	8.711	9.776	9.476	9.636	9.47	11.242	9.836	9.462	9.299	10.207	9.953	9.461	10.143	9.341	9.847	9.675	9.673	9.924	9.621	9.421	10.543	10.17	10.092	10.031	9.74	9.585	9.273	9.996	9.8	9.229	9.707	9.556	8.886	10.237	10.243	8.862	9.238	9.573	10.026
RUSC1-AS1	RUSC1-AS1	284618	1	155290250	155293938	1q22	NM_001039517.1	NP_001034606.1	5.773	5.053			6.067		4.688		5.197	4.91	4.499	4.485	5.23	4.978	5.205	5.732		4.574				4.545	4.787	4.692	4.446	5.141	5.022	4.789	4.556	4.717	5.069		5.884	5.146	4.809	5.093	4.683	4.83		4.945	4.645
RUSC1	RUSC1	23623	1	155290639	155300909	1q21-q22	NM_001105205.1	NP_055143.2	9.515	8.21	7.481	8.205	9.382	7.835	7.955	7.127	8.873	7.932	8.435	8.556	8.761	8.627	8.177	8.638	8.306	7.927	7.301	7.448	8.155	7.147	7.33	8.742	7.731	7.724	7.467	7.594	7.197	7.706	7.727	7.463	7.87	7.798	7.824	8.554	8.224	7.92	7.748	8.463	7.747
ASH1L	ASH1L	55870	1	155305051	155532324	1q22	NM_018489.2	NP_060959.2	8.715	7.783	7.421	8.183	8.484	8.255	8.189	8.028	8.79	8.681	7.824	8.155	8.058	8.109	8.291	8.197	7.591	7.497	7.681	7.852	7.06	7.615	8.089	8.269	8.216	8.772	7.853	8.096	7.793	8.284	8.184	8.087	7.969	7.751	7.564	8.749	7.565	8.036	8.121	8.741	8.377
POU5F1P4	POU5F1P4	645682	1	155402970	155404053	1q22
ASH1L-AS1	ASH1L-AS1	645676	1	155531771	155533735	1q22			6.5				5.611		4.629		4.564		4.527	4.808	4.712		4.918	4.494	4.561	4.911	5.394	5.153	6.904	4.656	5.693	5.107	4.659			5.455		4.535	4.523	4.466	4.803		4.515	4.49			4.753	4.485	5.079
MSTO1	MSTO1	55154	1	155579960	155584758	1q22	NM_018116.3	NP_001243462.1	6.246	5.879	5.623	5.959	6.712	6.816	5.414		6.561	6.066	5.867	5.2	6.135	6.369	6.576	5.697	5.129	5.689	6.495	6.945	5.829	6.949	6.085	6.886	5.337	6.942	6.46	5.867	6.061	5.698	6.555	5.995	6.064	6.045	5.679	6.293	6.072	6.448	5.597	6.674	5.94
YY1AP1	YY1AP1	55249	1	155629232	155658823	1q22	NM_001198899.1	NP_001185832.1	9.17	8.464	7.929	9.004	9.296	8.791	8.408	8.015	9.184	8.862	8.454	9.187	8.735	8.485	8.694	8.758	8.793	8.211	8.793	8.819	8.497	8.677	8.955	9.64	8.628	8.732	8.132	8.25	8.036	8.27	8.307	8.244	8.477	7.959	8.229	8.957	8.557	8.422	8.44	9.194	8.822
DAP3	DAP3	7818	1	155658881	155708800	1q22	NM_001199849.1	NP_001186780.1	9.32	8.968	8.076	9.076	9.249	9.05	8.712	8.587	9.388	8.477	9.071	9.796	9.445	9.026	8.877	9.073	8.975	8.646	8.542	9.176	9.27	8.583	9.202	9.698	9.163	9.35	9.052	9.048	8.778	9.052	9.073	9.135	9.305	9.137	8.18	9.04	9.016	9.182	8.865	9.539	8.842
GON4L	GON4L	54856	1	155719448	155829191	1q22	NM_032292.4	NP_115668.4	7.988	7.311	6.654	7.764	7.715	7.785	7.317	6.16	8.081	7.651	7.45	7.887	7.475	7.575	7.29	7.556	7.258	7.442	7.512	7.514	7.408	7.508	7.682	8.224	7.637	8.144	7.462	7.506	7.285	6.914	7.784	7.309	7.66	7.513	6.934	7.672	7.309	7.501	7.546	8.206	7.521
SYT11	SYT11	23208	1	155829259	155854990	1q21.2	NM_152280.4	NP_689493.3				7.088		6.615	7.203		9.009	7.091	7.931							5.524	4.831			4.624		8.697	4.865	7.121	5.801	6.304	6.018		5.777	4.677	4.725	4.475			4.459	6.335		5.808
RIT1	RIT1	6016	1	155867598	155881193	1q22	NM_006912.5	NP_001243750.1	6.27	6.176	5.979	6.584	6.922	7.037	6.512	6.452	7.731	7.166	7.418	6.454	6.767	4.771	5.681	6.28	4.708	5.477	6.056	5.154	6.117	6.293	5.877	7.135	6.462	7.205	6.002	5.64	5.835	5.832	7.194	6.228	5.391	5.35	6.072	6.655	6.43	6.18	7.502	6.67	8.208
KIAA0907	KIAA0907	22889	1	155882833	155904233	1q22	NM_014949.2	NP_055764.2	8.483	8.198	6.96	7.775	8.507	8.141	7.717		8.455	8.034	7.827	7.73	8.145	8.36	8.29	8.11	7.895	8.328	8.177	8.149	8.247	7.999	7.945	8.886	7.717	7.961	8.206	8.029	7.712	7.809	8.201	7.748	8.485	8.187	7.549	8.055	8.034	7.754	7.916	8.486	8.241
SNORA80E	SNORA80E	677823	1	155889699	155889833	1q22			7.172	7.042	6.909	6.477	7.341	7.296	6.613		7.358	7.033	6.756	6.797	6.874	7.117	7.171	7.177	7.071	6.979	7.053	7.048	7.174	7.38	7.828	7.809	7.172	7.209	7.089	7.06	7	6.894	7.15	7.09	7.283	7.42	6.798	6.992	7.282	7.16	6.614	7.368	7.27
SCARNA4	SCARNA4	677771	1	155895748	155895877	1q22			4.62										4.491		4.451		4.514			4.521						5.498	4.719		4.539	4.646					4.924				4.477			4.596	4.59
ARHGEF2	ARHGEF2	9181	1	155916629	155948336	1q21-q22	NM_001162383.1	NP_001155855.1	6.757	8.277	8.235	8.408	7.675	8.218	7.939	6.065	7.239	8.506	8	8.162	8.305	7.464	6.932	7.731	7.685	8.111	8.54	8.733	8.355	8.125	8.611	7.901	9.052	8.249	8.31	8.26	8.552	7.865	8.571	8.688	8.877	8.648	6.815	7.205	8.422	8.666	9.035	7.285	7.55
SSR2	SSR2	6746	1	155978838	155990758	1q21-q23	NM_003145.3	NP_003136.1	11.013	11.048	10.647	11.751	11.227	11.016	11.361	11.017	11.342	11.444	11.451	11.617	10.796	10.69	10.573	10.857	11.102	11.073	10.678	11.063	10.577	10.193	11.661	11.347	11.128	11.057	10.876	11.309	10.648	10.668	10.849	11.173	11.74	11.53	10.596	11.683	11.137	11.235	10.574	11.314	10.697
UBQLN4	UBQLN4	56893	1	156005084	156023616	1q21	NM_020131.3	NP_064516.2	8.218	7.157	6.716	7.792	7.955	7.068	7.248	5.322	7.349	7.026	6.922	7.486	7.591	7.678	7.169	7.328	7.151	6.924	6.957	6.782	7.354	6.904	7.784	8.303	7.385	7.547	7.24	7.744	6.825	6.984	6.943	7.093	7.653	7.684	7.136	7.682	7.177	7.654	6.448	8.678	7.134
LAMTOR2	LAMTOR2	28956	1	156024516	156028301	1q22	NM_014017.3	NP_054736.1	8.304	7.135	7.092	7.728	8.278	7.196	7.527	7.565	7.551	7.977	7.6	8.276	8.321	7.642	7.788	7.853	7.919	7.701	7.643	8.004	7.538	7.307	8.074	8.338	7.932	8.239	7.817	7.878	7.397	7.74	7.693	8.009	7.995	7.638	7.697	8.377	7.272	7.41	7.461	8.076	7.364
RAB25	RAB25	57111	1	156030939	156040305	1q22	NM_020387.2	NP_065120.2	8.683				9.203							9.193	9.368	8.395	8.704	9.318	9.253																								9.172
MEX3A	MEX3A	92312	1	156041803	156051789	1q22	NM_001093725.1	NP_001087194.1	6.846	5.157	5.594	6.944	6.126	6.352	5.857		6.516	5.606	6.008	5.158	6.048	5.791	5.686	6.474	5.409	7.438	5.85	5.498	6.046	6.042	5.145	5.076	5.888	5.811	5.901	5.67	5.193	5.765	5.79	5.709	6.018	6.182	5.346	6.483	5.899	5.486	5.175	6.276	5.189
LMNA	LMNA	4000	1	156052336	156109880	1q22	NM_005572.3	NP_733821.1	8.516	9.278	8.952	9.822	9.515	9.397	9.459	8.859	9.275	9.977	9.498	9.714	9.37	9.394	8.681	10.007	9.502	8.765	5.635	7.918	8.17	5.83	8.231	8.308	8.986	9.384	10.528	9.595	9.662	9.241	9.04	9.773	9.675	9.593	9.005	9.303	9.391	9.907	9.305	8.02	9.638
SEMA4A	SEMA4A	64218	1	156119734	156147542	1q22	NM_001193300.1	NP_001180230.1	7.597	5.142	5.199	5.23	7.871	5.06	5.109		5.115	5.233	5.12	6.281	4.955	4.864	5.218	6.235	5.48	5.193	7.329	7.016	5.098	5.161	5.548	4.914	4.973	5.072	4.931	5.132	5.019	5.128	5.087	5.074	4.933	5.316	5.164	5	5.259	5.212	5.471	5.014	6.779
SLC25A44	SLC25A44	9673	1	156163722	156182587	1q22	NM_014655.2	NP_055470.1	7.565	7.15	6.469	7.767	7.906	7.33	7.683	6.842	7.436	7.518	7.763	7.354	7.048	6.298	6.915	7.089	6.832	6.495	7.659	6.886	6.558	6.812	7.339	7.728	7.255	8.219	7.383	8.105	7.653	7.504	7.631	7.4	8.296	8.338	7.301	8.029	7.013	7.358	7.505	8.065	7.266
PMF1	PMF1	11243	1	156182778	156209868	1q12	NM_007221.3	NP_001186582.1	9.549	7.657	6.206	8.072	8.478	7.773	6.605	8.504	7.706	7.905	7.75	8.958	7.628	7.706	6.488	7.301	7.454	7.627	8.199	7.701	7.551	7.352	7.73	8.446	8.199	8.342	8.445	8.765	8.099	8.539	7.962	6.984	7.566		8.015	7.606	7.921	7.875	7.678	8.545	8.303
PAQR6	PAQR6	79957	1	156213111	156217908	1q22	NM_024897.3	NP_079173.2	6.751	6.17	5.768	5.791	7.997	5.868	6.153		6.047	7.09	6.881	6.5	6.006	6.709	6.904	6.178	6.139	6.676	6.329	5.994	6.015	6.09	6.09	6.24	5.76	6.314	6.532	5.947	5.787	6.14	6.181	6.42	6.592	6.68	6.344	6.605	5.896	5.737	6.334	6.779	6.785
SMG5	SMG5	23381	1	156219014	156252620	1q21.2	NM_015327.2	NP_056142.2	8.602	8.695	7.915	8.555	9.045	8.773	8.299	6.034	8.914	8.763	8.692	9.068	8.446	8.486	8.747	9.125	8.507	8.634	8.764	8.546	8.83	8.785	8.419	8.672	9.063	8.713	8.765	8.906	8.923	8.412	9.003	8.777	9.094	8.815	7.863	8.833	9.315	9.173	8.707	9.291	8.69
TMEM79	TMEM79	84283	1	156252703	156262234	1q22	NM_032323.2	NP_115699.1	6.742	6.336	6.074	6.265	8.295	6.298	6.658		6.455	6.534	6.273	7.074	6.446	5.96	6.271	6.39	6.4	6.116	6.632	6.162	6.9	6.624	6.419	6.709	6.421	6.374	6.398	6.221	6.007	5.975	6.397	6.006	6.415	6.46	6.369	6.739	6.782	6.812	6.562	7.719	7.141
[truncated: 21,200 more rows]
[truncated: 19 more columns]

## Sheet: Table S2
Table S2. Number of genes expressed by individual NCI-60 cell lines
Cell Line	# of Genes
CNS:SF-539	8150
LE:SR	17190
CO:HT29	17311
CO:HCT-15	17381
ME:M14	17470
[truncated: 55 more rows]

## Sheet: Table S3
Table S3. Ranking of NCI-60 (n = 59) cell lines by unique gene expression and coverage of human genome.
[truncated: 61 more rows]

[truncated: 11 more sheets: Table S4, Table S5, Table S6, Table S7, Table S8, Table S9, Table S10, Table S11, Table S12, Table S13, Table S14]
